# Supplementary material for: Organoboron/iodide-catalyzed photoredox N-functionalization of NH-sulfoximines/sulfonimidamides
Source: Royal Society of Chemistry journal article supplement (doi:10.1039/d3cc04351g), 2023-01-01

# Supporting Information

## Organoboron/Iodide-Catalyzed Photoredox N-Functionalization of NH-Sulfoximines/Sulfonimidamides

Jiawei Huang<sup>a</sup>, Xiaoman Li<sup>a</sup>, Yu Wei<sup>a</sup>, Zhigang Lei<sup>a, b\*</sup>, Liang Xu<sup>a\*</sup>

<sup>a</sup> School of Chemistry and Chemical Engineering/State Key Laboratory Incubation Base for Green Processing of Chemical Engineering, Shihezi University, Shihezi, China.

<sup>b</sup> Beijing University of Chemical Technology State Key Laboratory of Chemical Resource Engineering.

### Table of Contents

|                                                                                            |     |
|--------------------------------------------------------------------------------------------|-----|
| 1. General considerations                                                                  | S2  |
| 2. Optimizing the selection of photocatalysts for the synthesis of N-sulfonylated products | S3  |
| 3. The synthesis of the photocatalyst used                                                 | S4  |
| 4. General procedure for the N-functionalization of sulfoximines and sulfonimidamides      | S5  |
| 5. General Procedure for the Synthesis of NH-Sulfoximines                                  | S6  |
| 6. General Procedure for the Synthesis of NH-Sulfonimidamides                              | S6  |
| 7. General Procedure for the Synthesis of Thiosulfonate                                    | S6  |
| 8. A possible mechanism of N-phosphonylation of NH-sulfoximines                            | S7  |
| 9. Mechanism Study on N-sulfonylation of NH-sulfoximines using thiosulfonate               | S8  |
| 10. Trapping experiment of ArS-I                                                           | S10 |
| 11. Characterization data of Products                                                      | S11 |
| 12. References                                                                             | S27 |
| 13. Copies of NMR spectra                                                                  | S28 |

## 1. General considerations

**General.** Unless otherwise noted, all reactions were carried out under an air atmosphere. Analytical thin-layer chromatography (TLC) was performed on glass plates coated with 0.25 mm 230–400 mesh silica gel containing a fluorescent indicator. Visualization was accomplished by exposure to a UV lamp. All the products in this article are compatible with standard silica gel chromatography. Column chromatography was performed on silica gel (200–300 mesh) using standard methods.

**Structural analysis.** NMR spectra were measured on a Bruker Ascend 400 spectrometer and chemical shifts ( $\delta$ ) are reported in parts per million (ppm).  $^1\text{H}$  NMR spectra were recorded at 400 MHz in NMR solvents and referenced internally to corresponding solvent resonance, and  $^{13}\text{C}$  NMR spectra were recorded at 101 MHz and referenced to corresponding solvent resonance. Coupling constants are reported in Hz with multiplicities denoted as s (singlet), d (doublet), t (triplet), q (quartet), m (multiplet) and br (broad). Infrared spectra were collected on a Thermo Fisher Nicolet 6700 FT-IR spectrometer using ATR (Attenuated Total Reflectance) method. Absorption maxima ( $\nu_{\text{max}}$ ) are reported in wavenumbers ( $\text{cm}^{-1}$ ). High resolution mass spectra (HRMS) were acquired on Thermo Scientific LTQ Orbitrap XL with an APCI source.

**Materials.** Commercial reagents and solvent were purchased from Adamas, J&K, Energy, Sigma-Aldrich, Alfa Aesar, Acros Organics, TCI and used as received unless otherwise stated.

## 2. Optimizing the selection of photocatalysts for the synthesis of N-sulfenylated products

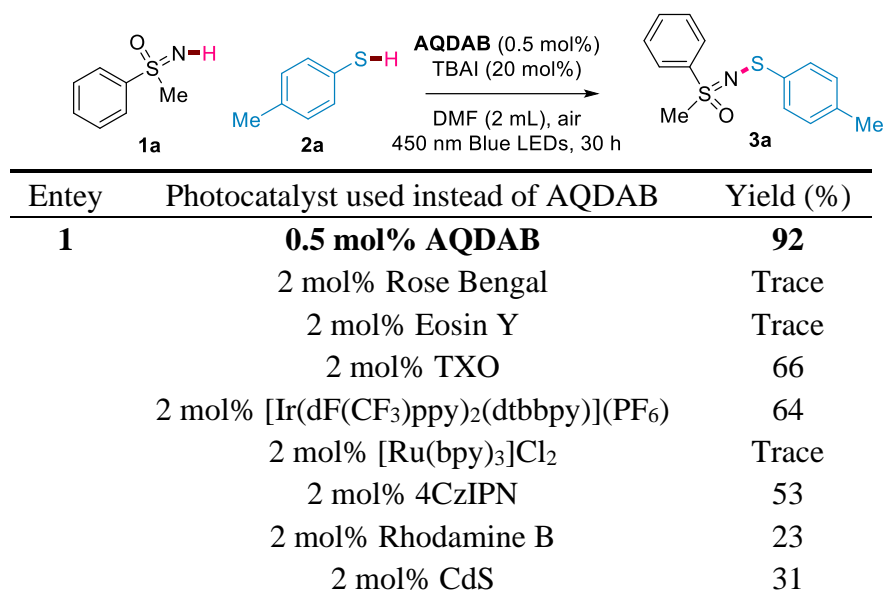

**Scheme S1.** Optimizing the selection of photocatalysts for the synthesis of N-sulfenylated products.

### 3. The synthesis of the photocatalyst used

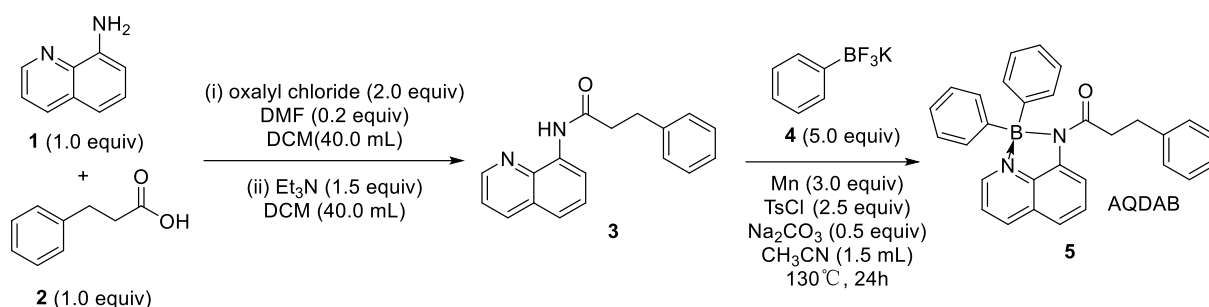

A mixture of hydrocinnamic acid **2** (3.0 g, 20 mmol), oxalyl chloride (5.1 g, 40 mmol, 2.0 equiv), DMF (0.3 mL, 4 mmol, 0.2 equiv) in anhydrous DCM (40.0 mL) was stirred at room temperature overnight. The reaction mixture was then concentrated in vacuo to give the crude hydrocinnamoyl chloride. A mixture of hydrocinnamoyl chloride, 8-aminoquinoline **1** (2.9 g, 20 mmol, 1.0 equiv), and triethylamine (4.2 mL, 30 mmol, 1.5 equiv) in anhydrous DCM (40 mL) was stirred at room temperature overnight. The reaction mixture was then washed with water and brine, dried over anhydrous Na<sub>2</sub>SO<sub>4</sub> and concentrated in vacuo. The resulting residue was purified by silica gel flash chromatography to give 4.1 g of the 3-phenyl-N-(quinolin-8-yl)propanamide **3** in 75% yield.

A flame-dried 25 mL reaction tube was placed with a stirring bar. Then, 3-phenyl-N-(quinolin-8-yl)propanamide **3** (41.4 mg, 0.15 mmol, 1.0 equiv), phenyl trifluoroborate **4** (138 mg, 0.75 mmol, 5.0 equiv), Mn (24.7 mg, 0.45 mmol, 3.0 equiv), 4-toluenesulfonyl chloride (71.5 mg, 0.375 mmol, 2.5 equiv), Na<sub>2</sub>CO<sub>3</sub> (7.9 mg, 0.075 mmol, 0.5 equiv) and CH<sub>3</sub>CN (1.5 mL) were added. The resulting mixture was stirred at 130 °C for 24 hours. Then, the reaction mixture was filtered, concentrated and purified by column chromatography (silica gel) to give 62.7 mg of the target product **AQDAB** in 95% yield.

#### 4. General procedure for the N-functionalization of sulfoximines and sulfonimidamides

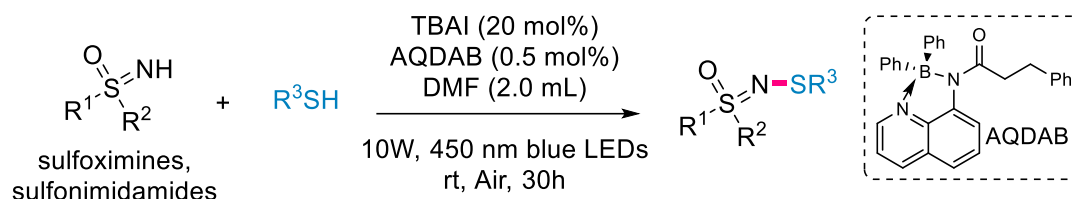

**General Procedure A:** sulfoximines or sulfonimidamides (0.20 mmol, 1.0 equiv), thiol (0.40 mmol, 2.0 equiv), TBAI (0.04 mmol, 20 mol%), AQDAB (0.001 mmol, 0.5 mol%), and DMF (2.0 mL) were added to a dried 25 mL reaction tube. The reaction tube was placed on a photocatalytic parallel reactor with a 450 nm blue LEDs light source (10 W) at the bottom (**Figure S1**). Then the reaction mixture was irradiated with the 450 nm blue LEDs (at approximately 0.3 cm away from the light source). After stirring for 30 hours at 25 °C, the reaction mixture was added 10 mL H<sub>2</sub>O and then extracted with ethyl acetate (3 × 10 mL). The combined organic phase was dried over Na<sub>2</sub>SO<sub>4</sub>, and concentrated under vacuum to afford the crude product, which was purified by column chromatography on silica gel using PE/EA (3: 1) as eluent to give the target products.

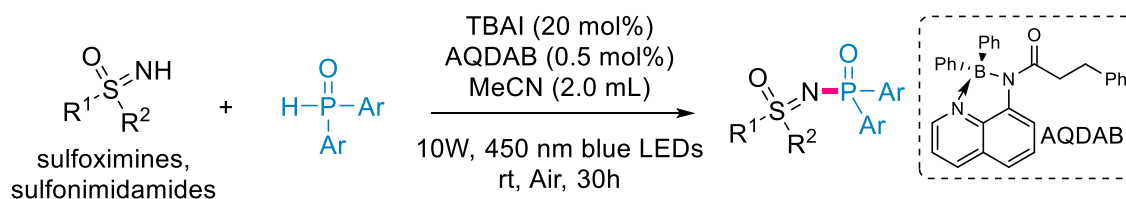

**General Procedure B:** sulfoximines or sulfonimidamides (0.20 mmol, 1.0 equiv), diphenylphosphine oxide (0.40 mmol, 2.0 equiv), TBAI (0.04 mmol, 20 mol%), AQDAB (0.001 mmol, 0.5 mol%), and MeCN (2.0 mL) were added to a dried 25 mL reaction tube. The reaction tube was placed on a photocatalytic parallel reactor with a 450 nm blue LEDs light source (10 W) at the bottom (**Figure S1**). Then the reaction mixture was irradiated with the 450 nm blue LEDs (at approximately 0.3 cm away from the light source). After stirring for 30 hours at 25 °C, the reaction mixture was added 10 mL H<sub>2</sub>O and then extracted with ethyl acetate (3 × 10 mL). The combined organic phase was dried over Na<sub>2</sub>SO<sub>4</sub>, and concentrated under vacuum to afford the crude product, which was purified by column chromatography on silica gel using PE/EA (3: 1) as eluent to give the target products.

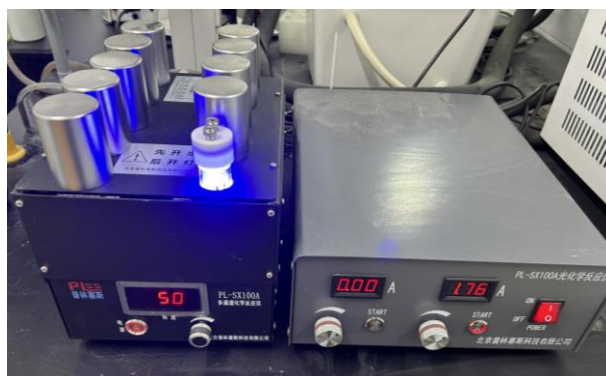

**Figure S1.** Picture of the reactor

## 5. General Procedure for the Synthesis of NH-Sulfoximines <sup>[1]</sup>

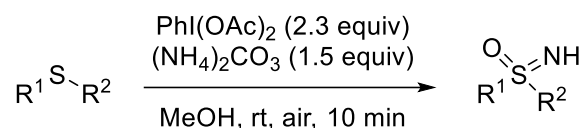

General Procedure for the Synthesis of NH-Sulfoximines. In a dried 50 mL pear-shaped flask equipped with a stirring bar, sulfide (1.0 mmol), PhI(OAc)<sub>2</sub> (2.3 mmol, 2.3 equiv), and (NH<sub>4</sub>)<sub>2</sub>CO<sub>3</sub> (1.5 mmol, 1.5 equiv) were added. Then, MeOH (10.0 mL) was added, and the reaction mixture was stirred at 25 °C for 10 min. The reaction was then quenched by the addition of saturated sodium bicarbonate (10.0 mL). The aqueous phase was extracted with ethyl acetate (10 mL × 3). The combined organic phase was dried over anhydrous MgSO<sub>4</sub>, filtered, and concentrated. The resulting residual was purified by flash silica gel column chromatography using a mixture of PE and EA as the eluent to afford the NH-sulfoximines.

## 6. General Procedure for the Synthesis of NH- Sulfonimidamides <sup>[2,3]</sup>

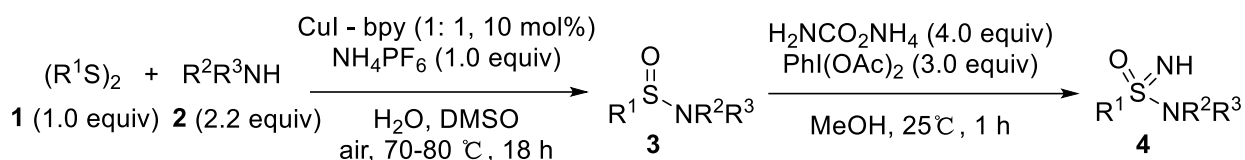

To a mixture of disulfides **1** (1.0 mmol), diethylamine **2** (2.2 mmol, 2.2 equiv), and NH<sub>4</sub>PF<sub>6</sub> (1.0 mmol, 1.0 equiv), in DMSO (0.6 mL) and H<sub>2</sub>O (0.15 mL) were added CuI (0.1 mmol, 10 mmol%) and bpy (0.1 mmol, 10 mmol%), and the mixture was stirred at 80 °C for 18 h in the presence of air provided by a balloon. After the residue was dissolved in Et<sub>2</sub>O, the solution was washed with H<sub>2</sub>O and saturated sodium chloride and dried with anhydrous magnesium sulfate. The resulting residual was purified by flash silica gel column chromatography using a mixture of diethyl ether and hexane as the eluent to afford the Sulfonimidamides **3**.

To the sulfonamide **3** (1.0 mmol) were added PhI(OAc)<sub>2</sub> (3.0 mmol, 3.0 equiv), H<sub>2</sub>NCO<sub>2</sub>NH<sub>4</sub> (4.0 mmol, 4.0 equiv) and finally MeOH (2.0 mL, 0.5 M). The mixture was stirred in an open flask at 25°C for 1 h. The reaction was then quenched by the addition of saturated sodium bicarbonate (10.0 mL). The aqueous phase was extracted with ethyl acetate (10 mL × 3). The combined organic phase was dried over anhydrous MgSO<sub>4</sub>, filtered, and concentrated. The resulting residual was purified by flash silica gel column chromatography using a mixture of PE and EA as the eluent to afford the NH-sulfonimidamides **4**.

## 7. General Procedure for the Synthesis of Thiosulfonate <sup>[4]</sup>

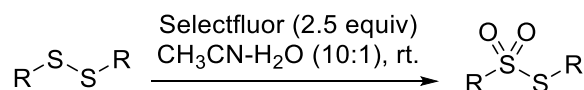

To a mixture of p-tolyl disulfide (1.0 mmol, 1.0 equiv), in acetonitrile (2.0 mL) and water (0.2 mL) were added Selectfluor (2.5 mmol, 2.5 equiv), and the mixture was stirred at room temperature for 20 min. The reaction was monitored by thin layer chromatography (TLC). After the disulfide disappeared from the TLC, water (5 mL) was added and the resulting mixture was extracted with ethyl acetate (15 mL × 3). The extract was washed with brine, dried over anhydrous magnesium sulfate, and evaporated. Chromatography on silica gel gave thiosulfonate as colorless crystals.

## 8. A possible mechanism of N-phosphonylation of NH-sulfoximines

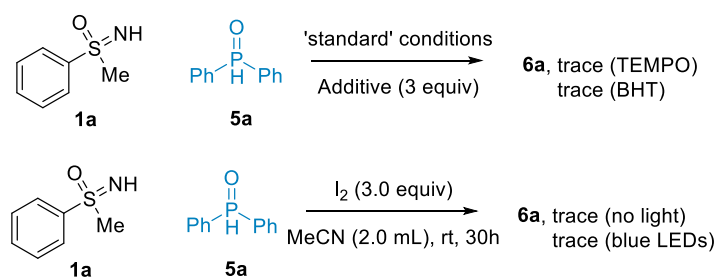

**Scheme S2.** Mechanistic studies for N-phosphonylation of NH-sulfoximines.

To further investigate the reaction mechanism for N-phosphonylation of NH-sulfoximines, a series of control experiments were conducted (**Scheme S2**). When a radical scavenger (TEMPO, BHT) was introduced into the reaction mixture, a significant suppression of the reaction process was observed. This indicates that radical species might be involved in the reaction mechanism. To confirm the role of iodine in the reaction, we attempted to carry out the reaction between diphenylphosphine oxide **5a** and sulfoximine **1a** using stoichiometric iodine. However, the desired compound could not be generated.

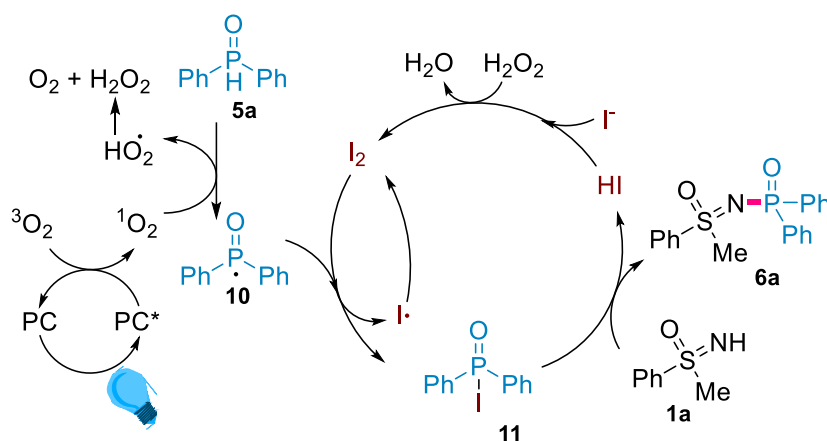

**Scheme S3.** A proposed mechanism for the N-phosphonylation of NH-sulfoximines.

A possible reaction mechanism has been proposed (**Scheme S3**). Initially, the photocatalyst PC was excited by visible light. The excited state PC\* was then quenched by triplet oxygen to generate singlet oxygen  $^1\text{O}_2$ . Subsequently, the hydrogen atom transfer (HAT) of the diphenylphosphine oxide **5a** by singlet oxygen  $^1\text{O}_2$  produced the P-centered radical **10** and hydroperoxide radical species. The disproportionation of the hydroperoxide radical would generate  $\text{O}_2$  and  $\text{H}_2\text{O}_2$ . At the same time, iodides were oxidized to  $\text{I}_2$  in the presence of  $\text{H}_2\text{O}_2$ . P-centered radical **10** reacted with  $\text{I}_2$  to generate active electrophilic species **11**. Subsequently, intermediate **11** and sulfoxide imine **1a** undergo nucleophilic substitution to obtain the final product **6a**.

## 9. Mechanism Study on N-sulfonylation of NH-sulfoximines using thiosulfonate

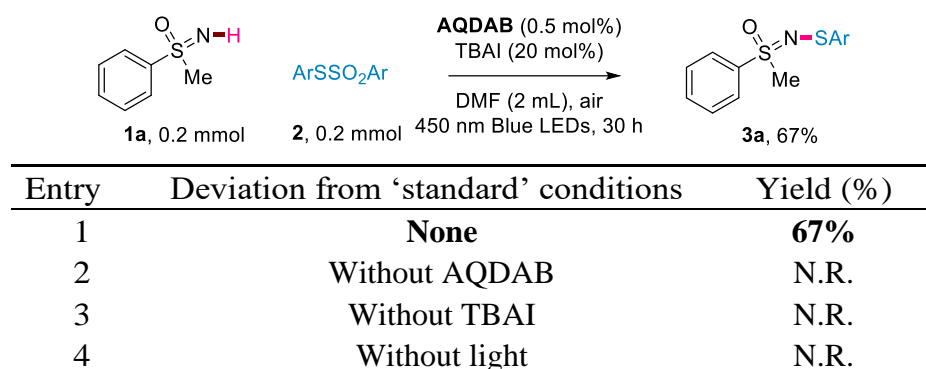

**Scheme S4.** Control Experiment for N-sulfonylation of NH-sulfoximines using thiosulfonate.

When thiosulfonate was used instead of thiol, the reaction proceeded smoothly and achieved a yield of 67%. In the absence of photocatalyst, iodine source or blue LEDs, no desired product was obtained (**Scheme S4** entries 2-4), indicating their essential role in N-sulfonylation during this transformation.

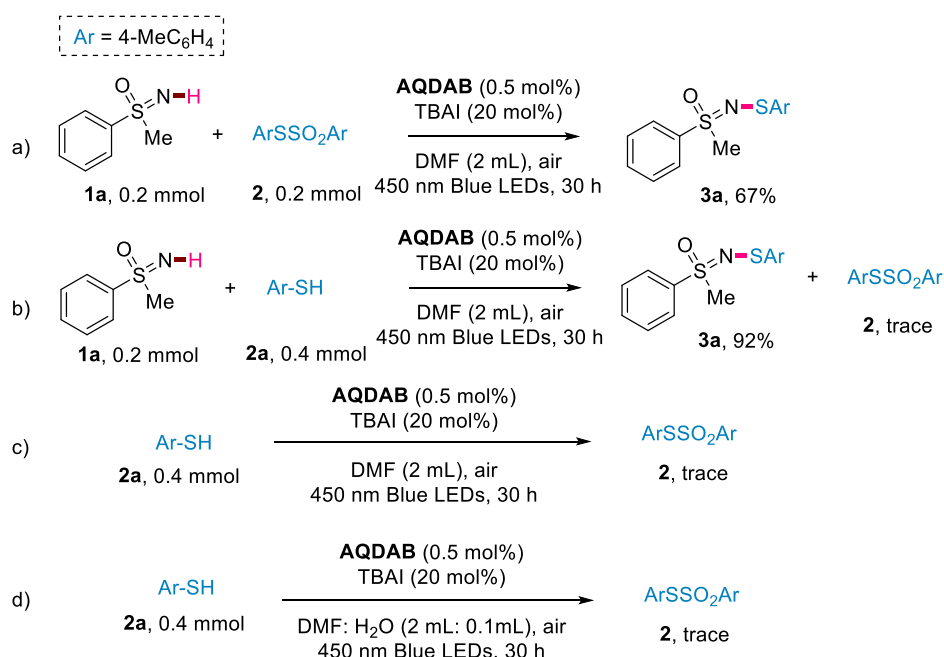

**Scheme S5.** Mechanistic studies for N-sulfonylation of NH-sulfoximines using thiosulfonate.

In order to further investigate the mechanism of thiosulfonate conversion in this reaction, we conducted control experiments (**Scheme S5**). Firstly, we substituted thiol with thiosulfonate under standard conditions and achieved a 67% yield of the desired product (**Scheme S5a**). However, we did not observe the formation of thiosulfonate in the reaction using thiol and sulfoximines (**Scheme S5b**). Similarly, when the reaction involved only thiol, we were unable to detect the formation of the oxidized product, thiosulfonate (**Scheme S5cd**). Based on these results, we propose a possible mechanism for this transformation.

A possible reaction mechanism has been proposed (**Scheme S6**). Initially, the photocatalyst PC was excited by visible light. The excited state PC\* was then quenched by triplet oxygen to generate singlet oxygen  $^1\text{O}_2$ . Subsequently, singlet oxygen  $^1\text{O}_2$  oxidizes  $\text{I}^-$  to  $\text{I}_2$  via a process of single electron transfer

(SET), resulting in the formation of the superoxide radical anion,  $O_2^{\cdot-}$ . In addition, PC was activated to excited state under the irradiation of blue LEDs and underwent energy transfer to thiosulfonate **2**. This process resulted in an excited **2\***. The excited **2\*** underwent homolytic cleavage to give thiol radicals **13** and sulfonyl radicals **14**. Thiol radicals **13** reacted with  $I_2$  to generate active electrophilic species ArS-I **8**. Then, **1a** functioned as the nucleophile to attack ArS-I **8**, affording **9**, which underwent deprotonation to generate the desired product **3a**.

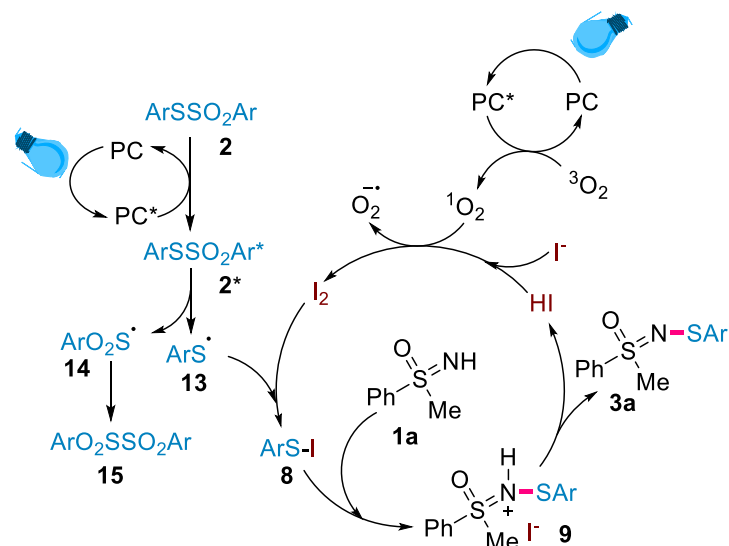

**Scheme S6.** A proposed mechanism for the N-sulfonylation of NH-sulfoximines using thiosulfonate.

## 10. Trapping experiment of ArS-I

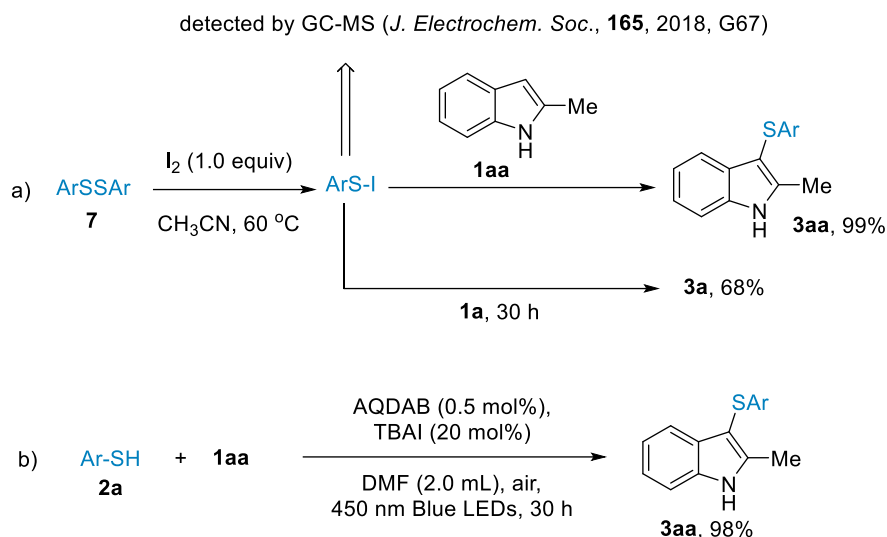

**Scheme S7.** Trapping experiment of ArS-I

In order to further confirm the existence of ArS-I intermediates, we designed and conducted several trapping experiments. According to the literature<sup>[6-8]</sup> by Chen group (*J. Electrochem. Soc.*, **165**, 2018, G67), ArS-I could be generated *in situ* from ArSSAr and I<sub>2</sub>, which was detected by GC-MS analysis, when they explored the mechanism of sulfenylation of 2-methylindole **1aa** (Scheme S7a). Using the same method, to the mixture of **7** and I<sub>2</sub> at 60 °C, 2-methylindole **1aa** and sulfoximine **1a** were added separately. 2-Methylindole was then sulfenylated to afford **3aa** in 99% yield, in line with the result reported by Chen group. In the meanwhile, **3a** was isolated in 68% yield. This implied these two reactions might involve the same ArS-I intermediate during the reaction process. Furthermore, **3aa** could also be successfully generated in 98% yield under the AQDAB/TBAI-catalyzed system (Scheme S7b). This also provided an indirect evidence for the involvement of ArS-I in the photoinduced transformation.

## 11. Characterization data of products

### (3a) methyl(phenyl)((p-tolylthio)imino)- $\lambda^6$ -sulfanone (CAS: 2247600-31-1)<sup>[9]</sup>

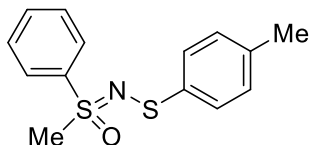

methyl(phenyl)((p-tolylthio)imino)- $\lambda^6$ -sulfanone

Chemical Formula: C<sub>14</sub>H<sub>15</sub>NOS<sub>2</sub>

Exact Mass: 277.0595

Molecular Weight: 277.4000

Following the General Procedure A with sulfoximine (31.0 mg, 0.2 mmol) and 4-toluenethiol (49.7 mg, 0.4 mmol), **3a** was obtained as a colorless oil (51.1 mg, 92%).

This target product was purified by column chromatography on silica gel (PE/EA = 3:1).

<sup>1</sup>H NMR (400 MHz, CDCl<sub>3</sub>)  $\delta$  7.94 (d, *J* = 7.6 Hz, 2H), 7.64 (d, *J* = 7.2 Hz, 1H), 7.56 (t, *J* = 7.6 Hz, 2H), 7.31 (d, *J* = 8.0 Hz, 2H), 7.08 (d, *J* = 8.0 Hz, 2H), 3.25 (s, 3H),

2.29 (s, 3H).

<sup>13</sup>C NMR (101 MHz, CDCl<sub>3</sub>)  $\delta$  138.8, 138.2, 135.2, 133.6, 129.4, 129.3, 128.4, 125.0, 43.7, 21.0.

### (3b) (((4-isopropylphenyl)thio)imino)(methyl)(phenyl)- $\lambda^6$ -sulfanone

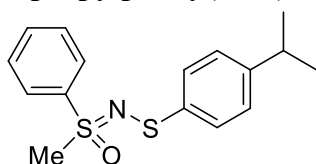

(((4-isopropylphenyl)thio)imino)(methyl)(phenyl)- $\lambda^6$ -sulfanone

Chemical Formula: C<sub>16</sub>H<sub>19</sub>NOS<sub>2</sub>

Exact Mass: 305.0908

Molecular Weight: 305.4540

Following the General Procedure A with sulfoximine (31.0 mg, 0.2 mmol) and 4-isopropylbenzenethiol (60.9 mg, 0.4 mmol), **3b** was obtained as a colorless oil (47.0 mg, 78%).

This target product was purified by column chromatography on silica gel (PE/EA = 3:1).

<sup>1</sup>H NMR (400 MHz, CDCl<sub>3</sub>)  $\delta$  7.93 (d, *J* = 8.0 Hz, 2H), 7.62 (d, *J* = 6.4 Hz, 1H), 7.54 (t, *J* = 6.8 Hz, 2H), 7.33 (d, *J* = 7.2 Hz, 2H), 7.12 (d, *J* = 7.6 Hz, 2H), 3.24 (s, 3H), 2.89 – 2.80 (m, 1H), 1.22 (s, 3H), 1.20 (s, 3H).

<sup>13</sup>C NMR (101 MHz, CDCl<sub>3</sub>)  $\delta$  146.4, 138.9, 138.6, 133.6, 129.5, 128.5, 126.7, 125.0, 43.8, 33.7, 24.0, 24.0.

IR (cm<sup>-1</sup>): 3060, 3018, 2961, 2926, 2870, 1595, 1493, 1447, 1406, 1213, 1092, 982, 822, 743, 687, 525  
HRMS (APCI) *m/z* calcd for C<sub>16</sub>H<sub>20</sub>NOS<sub>2</sub><sup>+</sup> (M+H)<sup>+</sup> 306.0981, found 306.0980.

### (3c) (((4-fluorophenyl)thio)imino)(methyl)(phenyl)- $\lambda^6$ -sulfanone (CAS: 2247600-33-3)<sup>[10]</sup>

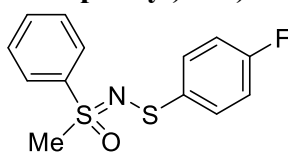

(((4-fluorophenyl)thio)imino)(methyl)(phenyl)- $\lambda^6$ -sulfanone

Chemical Formula: C<sub>13</sub>H<sub>12</sub>FNOS<sub>2</sub>

Exact Mass: 281.0344

Molecular Weight: 281.3634

Following the General Procedure A with sulfoximine (31.0 mg, 0.2 mmol) and 4-fluorobenzenethiol (50.5 mg, 0.4 mmol), **3c** was obtained as a colorless oil (50.6 mg, 90%).

This target product was purified by column chromatography on silica gel (PE/EA = 3:1).

<sup>1</sup>H NMR (400 MHz, CDCl<sub>3</sub>)  $\delta$  7.92 (d, *J* = 8.0 Hz, 2H), 7.65 (t, *J* = 7.2 Hz, 1H), 7.57 (t, *J* = 8.0 Hz, 2H), 7.43 – 7.34 (m, 2H), 6.96 (t, *J* = 8.8 Hz, 2H), 3.26 (s, 3H).

<sup>13</sup>C NMR (101 MHz, CDCl<sub>3</sub>)  $\delta$  161.3 (d, *J* = 244.4 Hz), 138.6, 136.9 (d, *J* = 3.0 Hz), 133.8, 129.6, 128.4, 127.0 (d, *J* = 7.9 Hz), 115.6 (d, *J* = 22.1 Hz), 43.9.

<sup>19</sup>F NMR (376 MHz, CDCl<sub>3</sub>)  $\delta$  -117.31.

### (3d) (((4-chlorophenyl)thio)imino)(methyl)(phenyl)- $\lambda^6$ -sulfanone (CAS: 2247600-32-2)<sup>[10]</sup>

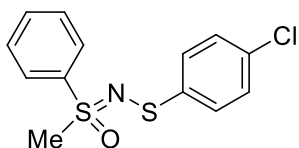

((4-chlorophenylthio)imino)(methyl)(phenyl)- $\lambda^6$ -sulfanone

Chemical Formula:  $C_{13}H_{12}ClNOS_2$

Exact Mass: 297.0049

Molecular Weight: 297.8150

129.6, 128.5, 128.4, 125.1, 43.8.

Following the General Procedure A with sulfoximine (31.0 mg, 0.2 mmol) and 4-chlorobenzenethiol (57.8 mg, 0.4 mmol), **3d** was obtained as a colorless oil (53.4 mg, 90%).

This target product was purified by column

chromatography on silica gel (PE/EA = 3:1).

$^1H$  NMR (400 MHz,  $CDCl_3$ )  $\delta$  7.92 (d,  $J$  = 7.6 Hz, 2H), 7.66 (t,  $J$  = 7.2 Hz, 1H), 7.57 (t,  $J$  = 7.6 Hz, 2H), 7.31 (d,  $J$  = 8.4 Hz, 2H), 7.21 (d,  $J$  = 8.4 Hz, 2H), 3.27 (s, 3H).

$^{13}C$  NMR (101 MHz,  $CDCl_3$ )  $\delta$  141.0, 138.5, 133.9, 130.6,

**(3e) (((4-bromophenyl)thio)imino)(methyl)(phenyl)- $\lambda^6$ -sulfanone (CAS: 2762998-29-6)<sup>[9]</sup>**

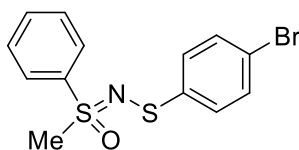

((4-bromophenylthio)imino)(methyl)(phenyl)- $\lambda^6$ -sulfanone

Chemical Formula:  $C_{13}H_{12}BrNOS_2$

Exact Mass: 340.9544

Molecular Weight: 342.2690

129.6, 128.4, 125.3, 118.4, 43.9.

Following the General Procedure A with sulfoximine (31.0 mg, 0.2 mmol) and 4-bromobenzenethiol (74.8 mg, 0.4 mmol), **3e** was obtained as a colorless oil (65.6 mg, 96%).

This target product was purified by column

chromatography on silica gel (PE/EA = 3:1).

$^1H$  NMR (400 MHz,  $CDCl_3$ )  $\delta$  7.92 (d,  $J$  = 7.2 Hz, 2H), 7.66 (t,  $J$  = 7.6 Hz, 1H), 7.57 (t,  $J$  = 8.0 Hz, 2H), 7.31 (d,  $J$  = 8.4 Hz, 2H), 7.21 (d,  $J$  = 8.4 Hz, 2H), 3.27 (s, 3H).

$^{13}C$  NMR (101 MHz,  $CDCl_3$ )  $\delta$  141.8, 138.5, 133.9, 131.4,

**(3f) methyl(phenyl)((4-(trifluoromethyl)phenyl)thio)imino)- $\lambda^6$ -sulfanone (CAS: 2762998-27-4)<sup>[9]</sup>**

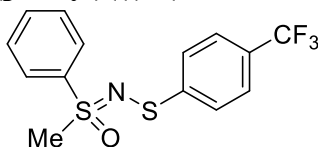

methyl(phenyl)((4-(trifluoromethyl)phenyl)thio)imino)- $\lambda^6$ -sulfanone

Chemical Formula:  $C_{14}H_{12}F_3NOS_2$

Exact Mass: 331.0312

Molecular Weight: 331.3712

$^{13}C$  NMR (101 MHz,  $CDCl_3$ )  $\delta$  148.1, 138.3, 134.0, 129.7, 128.4, 126.6 (q,  $J$  = 32.4 Hz), 125.3 (q,  $J$  = 3.8 Hz), 124.4 (q,  $J$  = 271.3 Hz), 122.5, 44.0.

$^{19}F$  NMR (376 MHz,  $CDCl_3$ )  $\delta$  -62.10.

Following the General Procedure A with sulfoximine (31.0 mg, 0.2 mmol) and 4-(trifluoromethyl)benzenethiol (71.3 mg, 0.4 mmol), **3f** was obtained as a colorless oil (55.6 mg, 84%).

This target product was purified by column chromatography on silica gel (PE/EA = 3:1).

$^1H$  NMR (400 MHz,  $CDCl_3$ )  $\delta$  7.94 (d,  $J$  = 8.0 Hz, 2H), 7.68 (t,  $J$  = 7.6 Hz, 1H), 7.60 (t,  $J$  = 7.6 Hz, 2H), 7.47 (q,  $J$  = 8.8 Hz, 4H), 3.31 (s, 3H).

**(3g) methyl(phenyl)((*m*-tolylthio)imino)- $\lambda^6$ -sulfanone (CAS: 2247600-37-7)<sup>[10]</sup>**

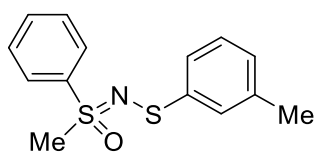

methyl(phenyl)((*m*-tolylthio)imino)- $\lambda^6$ -sulfanone

Chemical Formula:  $C_{14}H_{15}NOS_2$

Exact Mass: 277.0595

Molecular Weight: 277.4000

Following the General Procedure A with sulfoximine (31.0 mg, 0.2 mmol) and 3-methylbenzenethiol (49.7 mg, 0.4 mmol), **3g** was obtained as a colorless oil (46.7 mg, 84%).

This target product was purified by column chromatography on silica gel (PE/EA = 3:1).

$^1\text{H}$  NMR (400 MHz,  $\text{CDCl}_3$ )  $\delta$  7.94 (d,  $J = 7.6$  Hz, 2H), 7.64 (t,  $J = 7.6$  Hz, 1H), 7.56 (t,  $J = 7.6$  Hz, 2H), 7.23 – 7.11 (m, 3H), 6.89 (d,  $J = 7.2$  Hz, 1H), 3.26 (s, 3H), 2.30 (s, 3H).

$^{13}\text{C}$  NMR (101 MHz,  $\text{CDCl}_3$ )  $\delta$  141.9, 138.8, 138.2, 133.7, 129.5, 128.4, 128.4, 126.1, 124.4, 121.1, 43.8, 21.5.

### (3h) (((3-methoxyphenyl)thio)imino)(methyl)(phenyl)- $\lambda^6$ -sulfanone

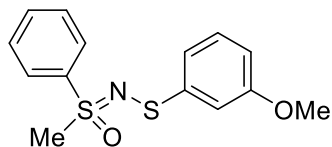

(((3-methoxyphenyl)thio)imino)(methyl)(phenyl)- $\lambda^6$ -sulfanone

Chemical Formula:  $\text{C}_{14}\text{H}_{15}\text{NO}_2\text{S}_2$

Exact Mass: 293.0544

Molecular Weight: 293.3990

Following the General Procedure A with sulfoximine (31.0 mg, 0.2 mmol) and 3-methoxybenzenethiol (56.1 mg, 0.4 mmol), **3h** was obtained as a colorless oil (43.4 mg, 74%).

This target product was purified by column chromatography on silica gel (PE/EA = 3:1).

$^1\text{H}$  NMR (400 MHz,  $\text{CDCl}_3$ )  $\delta$  7.95 (d,  $J = 8.0$  Hz, 2H), 7.68 – 7.62 (m, 1H), 7.61 – 7.53 (m, 2H), 7.22 – 7.13 (m, 1H), 7.00 (s, 1H), 6.94 (d,  $J = 8.0$  Hz, 1H), 6.63 (d,

$J = 8.0$  Hz, 1H), 3.78 (s, 3H), 3.27 (s, 3H).

$^{13}\text{C}$  NMR (101 MHz,  $\text{CDCl}_3$ )  $\delta$  159.9, 143.8, 138.7, 133.8, 129.5, 129.4, 128.4, 115.9, 111.1, 108.9, 55.2, 43.7.

IR ( $\text{cm}^{-1}$ ): 3298, 3063, 3005, 2928, 2835, 1576, 1474, 1281, 1217, 1092, 984, 858, 744, 685, 525.

HRMS (APCI)  $m/z$  calcd for  $\text{C}_{14}\text{H}_{16}\text{NO}_2\text{S}_2^+$  ( $\text{M}+\text{H}$ ) $^+$  294.0617, found 294.0611.

### (3i) (((3-fluorophenyl)thio)imino)(methyl)(phenyl)- $\lambda^6$ -sulfanone

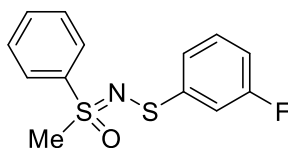

(((3-fluorophenyl)thio)imino)(methyl)(phenyl)- $\lambda^6$ -sulfanone

Chemical Formula:  $\text{C}_{13}\text{H}_{12}\text{FNOS}_2$

Exact Mass: 281.0344

Molecular Weight: 281.3634

Following the General Procedure A with sulfoximine (31.0 mg, 0.2 mmol) and 3-fluorobenzenethiol (51.3 mg, 0.4 mmol), **3i** was obtained as a colorless oil (47.3 mg, 84%).

This target product was purified by column chromatography on silica gel (PE/EA = 3:1).

$^1\text{H}$  NMR (400 MHz,  $\text{CDCl}_3$ )  $\delta$  7.95 (d,  $J = 8.4$  Hz, 2H), 7.67 (t,  $J = 6.4$  Hz, 1H), 7.59 (t,  $J = 7.2$  Hz, 2H), 7.21 – 7.12 (m, 2H), 7.08 (d,  $J = 8.0$  Hz, 1H), 6.76 – 6.67 (m, 1H), 3.30 (s, 3H).

$^{13}\text{C}$  NMR (101 MHz,  $\text{CDCl}_3$ )  $\delta$  163.1 (d,  $J = 247.1$  Hz), 145.3 (d,  $J = 7.5$  Hz), 138.5, 133.9, 129.7 (d,  $J = 8.5$  Hz), 129.6, 128.4, 118.6 (d,  $J = 2.8$  Hz), 111.7 (d,  $J = 21.6$  Hz), 110.3 (d,  $J = 24.6$  Hz), 43.9.

$^{19}\text{F}$  NMR (376 MHz,  $\text{CDCl}_3$ )  $\delta$  -112.66.

IR ( $\text{cm}^{-1}$ ): 3065, 3017, 2926, 1597, 1470, 1207, 1092, 983, 879, 777, 743, 679, 525.

HRMS (APCI)  $m/z$  calcd for  $\text{C}_{13}\text{H}_{13}\text{FNOS}_2^+$  ( $\text{M}+\text{H}$ ) $^+$  282.0417, found 282.0413.

### (3j) methyl(phenyl)((o-tolylthio)imino)- $\lambda^6$ -sulfanone (CAS: 2247600-34-4)<sup>[10]</sup>

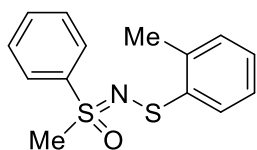

methyl(phenyl)((o-tolylthio)imino)- $\lambda^6$ -sulfanone

Chemical Formula:  $\text{C}_{14}\text{H}_{15}\text{NOS}_2$

Exact Mass: 277.0595

Molecular Weight: 277.4000

Following the General Procedure A with sulfoximine (31.0 mg, 0.2 mmol) and 2-methylbenzenethiol (49.7 mg, 0.4 mmol), **3j** was obtained as a colorless oil (37.2 mg, 67%).

This target product was purified by column chromatography on silica gel (PE/EA = 3:1).

$^1\text{H}$  NMR (400 MHz,  $\text{CDCl}_3$ )  $\delta$  7.96 (d,  $J = 7.6$  Hz, 2H), 7.64 (t,  $J = 8.0$  Hz, 2H), 7.56 (t,  $J = 8.0$  Hz, 2H), 7.23 –

7.16 (m, 1H), 7.04 – 6.91 (m, 2H), 3.27 (s, 3H), 2.15 (s, 3H).

$^{13}\text{C}$  NMR (101 MHz,  $\text{CDCl}_3$ )  $\delta$  140.8, 138.9, 133.7, 132.2, 129.5, 129.5, 128.4, 126.3, 124.5, 123.3, 43.8, 18.8.

**(3k) (((2-chlorophenyl)thio)imino)(methyl)(phenyl)- $\lambda^6$ -sulfanone (CAS: 2762998-28-5)<sup>[9]</sup>**

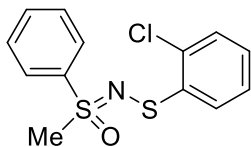

(((2-chlorophenyl)thio)imino)(methyl)(phenyl)- $\lambda^6$ -sulfanone

Chemical Formula:  $\text{C}_{13}\text{H}_{12}\text{ClNOS}_2$

Exact Mass: 297.0049

Molecular Weight: 297.8150

Following the General Procedure A with sulfoximine (31.0 mg, 0.2 mmol) and 2-chlorobenzenethiol (57.8 mg, 0.4 mmol), **3k** was obtained as a colorless oil (44.4 mg, 75%).

This target product was purified by column

chromatography on silica gel (PE/EA = 3:1).

$^1\text{H}$  NMR (400 MHz,  $\text{CDCl}_3$ )  $\delta$  7.96 (d,  $J$  = 8.6 Hz, 2H), 7.68 (dd,  $J$  = 16.3, 7.7 Hz, 2H), 7.59 (t,  $J$  = 7.6 Hz, 2H), 7.26 (t,  $J$  = 7.6 Hz, 1H), 7.18 (d,  $J$  = 7.9 Hz, 1H), 7.00 (t,  $J$  = 7.6 Hz, 1H), 3.31 (s, 3H).

$^{13}\text{C}$  NMR (101 MHz,  $\text{CDCl}_3$ )  $\delta$  141.4, 138.6, 133.9, 129.7, 128.7, 128.4, 127.0, 126.9, 125.2, 124.1, 44.0.

**(3l) (((2,6-dimethylphenyl)thio)imino)(methyl)(phenyl)- $\lambda^6$ -sulfanone**

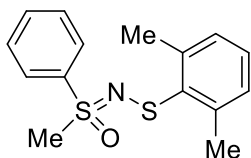

(((2,6-dimethylphenyl)thio)imino)(methyl)(phenyl)- $\lambda^6$ -sulfanone

Chemical Formula:  $\text{C}_{15}\text{H}_{17}\text{NOS}_2$

Exact Mass: 291.0752

Molecular Weight: 291.4270

Following the General Procedure A with sulfoximine (31.0 mg, 0.2 mmol) and 2,6-dimethylbenzenethiol (55.3 mg, 0.4 mmol), **3l** was obtained as a colorless oil (37.3 mg, 64%).

This target product was purified by column chromatography on silica gel (PE/EA = 3:1).

$^1\text{H}$  NMR (400 MHz,  $\text{CDCl}_3$ )  $\delta$  7.69 (d,  $J$  = 7.6 Hz, 2H), 7.54 (t,  $J$  = 7.6 Hz, 1H), 7.39 (t,  $J$  = 8.0 Hz, 2H), 7.06 – 7.00 (m, 1H), 6.94 (d,  $J$  = 7.6 Hz, 2H), 3.09 (s, 3H),

2.43 (s, 6H).

$^{13}\text{C}$  NMR (101 MHz,  $\text{CDCl}_3$ )  $\delta$  141.8, 139.1, 137.6, 133.2, 129.1, 128.7, 128.6, 127.8, 44.2, 21.6.

IR ( $\text{cm}^{-1}$ ): 3057, 3011, 2928, 1580, 1447, 1202, 1090, 989, 771, 746, 689, 523.

HRMS (APCI)  $m/z$  calcd for  $\text{C}_{15}\text{H}_{18}\text{NOS}_2^+$  ( $\text{M}+\text{H}$ ) $^+$  292.0824, found 292.0816.

**(3m) methyl(phenyl)((pyridin-2-ylthio)imino)- $\lambda^6$ -sulfanone (CAS: 2762998-30-9)<sup>[9]</sup>**

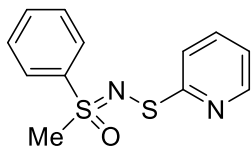

methyl(phenyl)((pyridin-2-ylthio)imino)- $\lambda^6$ -sulfanone

Chemical Formula:  $\text{C}_{12}\text{H}_{12}\text{N}_2\text{OS}_2$

Exact Mass: 264.0391

Molecular Weight: 264.3610

Following the General Procedure A with sulfoximine (31.0 mg, 0.2 mmol) and 2-pyridinethione (44.5 mg, 0.4 mmol), **3m** was obtained as a colorless oil (33.8 mg, 64%).

This target product was purified by column chromatography on silica gel (PE/EA = 3:1).

$^1\text{H}$  NMR (400 MHz,  $\text{CDCl}_3$ )  $\delta$  8.39 – 8.31 (m, 1H), 8.04 – 7.94 (m, 2H), 7.70 – 7.56 (m, 5H), 6.98 – 6.89

(m, 1H), 3.35 (s, 3H).

$^{13}\text{C}$  NMR (101 MHz,  $\text{CDCl}_3$ )  $\delta$  165.8, 148.6, 138.4, 136.6, 133.9, 129.6, 128.5, 119.1, 117.9, 43.8.

**(3n) ((benzylthio)imino)(methyl)(phenyl)- $\lambda^6$ -sulfanone (CAS: 2762998-33-2)<sup>[9]</sup>**

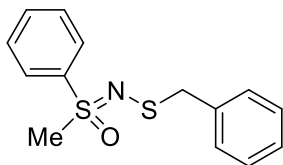

((benzylthio)imino)(methyl)(phenyl)- $\lambda^6$ -sulfanone

Chemical Formula: C<sub>14</sub>H<sub>15</sub>NOS<sub>2</sub>

Exact Mass: 277.0595

Molecular Weight: 277.4000

Following the General Procedure A with sulfoximine (31.0 mg, 0.2 mmol) and benzyl mercaptan (49.7 mg, 0.4 mmol), **3n** was obtained as a colorless oil (22.7 mg, 41%). This target product was purified by column chromatography on silica gel (PE/EA = 3:1).

<sup>1</sup>H NMR (400 MHz, CDCl<sub>3</sub>)  $\delta$  7.92 – 7.85 (m, 2H), 7.67 – 7.61 (m, 1H), 7.59 – 7.53 (m, 2H), 7.37 – 7.32 (m, 2H), 7.31 – 7.25 (m, 2H), 7.24 – 7.19 (m, 1H), 4.16 – 4.02 (m, 2H), 3.09 (s, 3H).

<sup>13</sup>C NMR (101 MHz, CDCl<sub>3</sub>)  $\delta$  139.2, 136.8, 133.5, 129.5, 129.4, 128.5, 128.4, 127.1, 45.9, 43.4.

**(3o) methyl((octylthio)imino)(phenyl)- $\lambda^6$ -sulfanone**

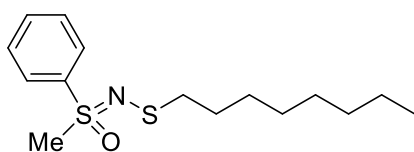

methyl((octylthio)imino)(phenyl)- $\lambda^6$ -sulfanone

Chemical Formula: C<sub>15</sub>H<sub>25</sub>NOS<sub>2</sub>

Exact Mass: 299.1378

Molecular Weight: 299.4910

Following the General Procedure A with sulfoximine (31.0 mg, 0.2 mmol) and 1-mercaptooctane (58.5 mg, 0.4 mmol), **3o** was obtained as a colorless oil (18.5 mg, 31%).

This target product was purified by column chromatography on silica gel (PE/EA = 3:1).

<sup>1</sup>H NMR (400 MHz, CDCl<sub>3</sub>)  $\delta$  7.99 – 7.85 (m, 2H), 7.68 – 7.62 (m, 1H), 7.62 – 7.54 (m, 2H), 3.19 (s, 3H), 2.91 – 2.72 (m, 2H), 1.68 (t,  $J$  = 7.6 Hz, 2H), 1.41 – 1.34 (m, 2H), 1.31 – 1.23 (m, 8H), 0.89 – 0.85 (m, 3H).

<sup>13</sup>C NMR (101 MHz, CDCl<sub>3</sub>)  $\delta$  139.3, 133.4, 129.4, 128.5, 43.9, 41.1, 31.8, 29.2, 29.2, 28.8, 27.8, 22.7, 14.1.

**(3p) methyl(p-tolyl)((p-tolylthio)imino)- $\lambda^6$ -sulfanone**

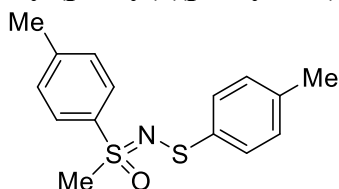

methyl(p-tolyl)((p-tolylthio)imino)- $\lambda^6$ -sulfanone

Chemical Formula: C<sub>15</sub>H<sub>17</sub>NOS<sub>2</sub>

Exact Mass: 291.0752

Molecular Weight: 291.4270

Following the General Procedure A with imino(methyl)(p-tolyl)- $\lambda^6$ -sulfanone (33.8 mg, 0.2 mmol) and 4-toluenethiol (49.7 mg, 0.4 mmol), **3p** was obtained as a colorless oil (50.7 mg, 87%).

This target product was purified by column chromatography on silica gel (PE/EA = 3:1).

<sup>1</sup>H NMR (400 MHz, CDCl<sub>3</sub>)  $\delta$  7.81 (d,  $J$  = 8.0 Hz, 2H), 7.35 (d,  $J$  = 8.4 Hz, 2H), 7.31 (d,  $J$  = 8.0 Hz, 2H), 7.07 (d,  $J$  = 8.0 Hz, 2H), 3.22 (s, 3H), 2.44 (s, 3H), 2.29 (s, 3H).

<sup>13</sup>C NMR (101 MHz, CDCl<sub>3</sub>)  $\delta$  144.7, 138.5, 135.7, 135.1, 130.2, 129.3, 128.5, 124.8, 43.9, 21.6, 21.0.

IR (cm<sup>-1</sup>): 3306, 3020, 2922, 1917, 1597, 1489, 1448, 1398, 1315, 1204, 1090, 980, 806, 752, 528.

HRMS (APCI)  $m/z$  calcd for C<sub>15</sub>H<sub>17</sub>NOS<sub>2</sub>Na<sup>+</sup> (M+Na)<sup>+</sup> 314.0644, found 314.0635.

**(3q) (4-methoxyphenyl)(methyl)((p-tolylthio)imino)- $\lambda^6$ -sulfanone**

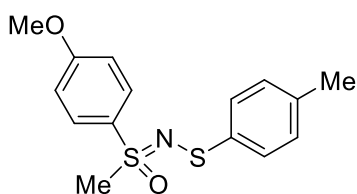

(4-methoxyphenyl)(methyl)((*p*-tolylthio)imino)- $\lambda^6$ -sulfanone

Chemical Formula:  $C_{15}H_{17}NO_2S_2$

Exact Mass: 307.0701

Molecular Weight: 307.4260

129.7, 129.2, 124.7, 114.6, 55.7, 44.0, 20.9.

IR ( $cm^{-1}$ ): 3308, 3013, 2924, 2575, 1900, 1593, 1491, 1406, 1310, 1258, 1094, 831, 764, 704, 522.

HRMS (APCI)  $m/z$  calcd for  $C_{15}H_{17}NO_2S_2Na^+$  ( $M+Na$ ) $^+$  330.0593, found 330.0582.

Following the General Procedure A with imino(4-methoxyphenyl)(methyl)- $\lambda^6$ -sulfanone (37.0 mg, 0.2 mmol) and 4-toluenethiol (49.7 mg, 0.4 mmol), **3q** was obtained as a colorless oil (48.3 mg, 79%).

This target product was purified by column chromatography on silica gel (PE/EA = 3:1).

$^1H$  NMR (400 MHz,  $CDCl_3$ )  $\delta$  7.85 (d,  $J$  = 6.8 Hz, 2H), 7.31 (d,  $J$  = 6.4 Hz, 2H), 7.07 (d,  $J$  = 7.2 Hz, 2H), 7.05 – 6.96 (m, 2H), 3.87 (s, 3H), 3.23 (s, 3H), 2.29 (s, 3H).

$^{13}C$  NMR (101 MHz,  $CDCl_3$ )  $\delta$  163.7, 138.5, 135.0, 130.5,

### (3r) (4-fluorophenyl)(methyl)((*p*-tolylthio)imino)- $\lambda^6$ -sulfanone

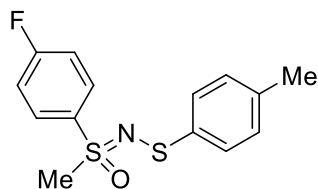

(4-fluorophenyl)(methyl)((*p*-tolylthio)imino)- $\lambda^6$ -sulfanone

Chemical Formula:  $C_{14}H_{14}FNOS_2$

Exact Mass: 295.0501

Molecular Weight: 295.3904

138.0, 135.5, 134.6 (d,  $J$  = 3.1 Hz), 131.3 (d,  $J$  = 9.6 Hz), 129.4, 125.2, 116.8 (d,  $J$  = 22.7 Hz), 43.9, 21.0.

$^{19}F$  NMR (376 MHz,  $CDCl_3$ )  $\delta$  -103.77.

IR ( $cm^{-1}$ ): 3099, 3057, 3018, 2928, 1587, 1489, 1402, 1207, 1094, 991, 962, 847, 800, 714, 532, 482.

HRMS (APCI)  $m/z$  calcd for  $C_{14}H_{15}FNOS_2^+$  ( $M+H$ ) $^+$  296.0574, found 296.0568.

Following the General Procedure A with (4-fluorophenyl)(imino)(methyl)- $\lambda^6$ -sulfanone (34.6 mg, 0.2 mmol) and 4-toluenethiol (49.7 mg, 0.4 mmol), **3r** was obtained as a colorless oil (53.9 mg, 91%).

This target product was purified by column chromatography on silica gel (PE/EA = 3:1).

$^1H$  NMR (400 MHz,  $CDCl_3$ )  $\delta$  7.97 – 7.89 (m, 2H), 7.29 (d,  $J$  = 8.0 Hz, 2H), 7.22 (t,  $J$  = 8.8 Hz, 2H), 7.08 (d,  $J$  = 7.6 Hz, 2H), 3.25 (s, 3H), 2.29 (s, 3H).

$^{13}C$  NMR (101 MHz,  $CDCl_3$ )  $\delta$  165.8 (d,  $J$  = 256.4 Hz),

### (3s) (4-chlorophenyl)(methyl)((*p*-tolylthio)imino)- $\lambda^6$ -sulfanone

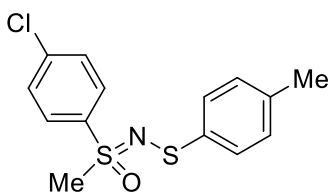

(4-chlorophenyl)(methyl)((*p*-tolylthio)imino)- $\lambda^6$ -sulfanone

Chemical Formula:  $C_{14}H_{14}ClNOS_2$

Exact Mass: 311.0205

Molecular Weight: 311.8420

130.0, 129.8, 129.4, 125.3, 43.8, 21.0.

IR ( $cm^{-1}$ ): 3076, 3017, 2920, 1572, 1489, 1396, 1215, 1086, 945, 802, 775, 525.

HRMS (APCI)  $m/z$  calcd for  $C_{14}H_{15}ClNOS_2^+$  ( $M+H$ ) $^+$  312.0278, found 312.0283.

Following the General Procedure A with (4-chlorophenyl)(imino)(methyl)- $\lambda^6$ -sulfanone (37.9 mg, 0.2 mmol) and 4-toluenethiol (49.7 mg, 0.4 mmol), **3s** was obtained as a colorless oil (53.7 mg, 86%).

This target product was purified by column chromatography on silica gel (PE/EA = 3:1).

$^1H$  NMR (400 MHz,  $CDCl_3$ )  $\delta$  7.85 (d,  $J$  = 8.8 Hz, 2H), 7.52 (d,  $J$  = 8.8 Hz, 2H), 7.29 (d,  $J$  = 8.0 Hz, 2H), 7.08 (d,  $J$  = 8.0 Hz, 2H), 3.24 (s, 3H), 2.29 (s, 3H).

$^{13}C$  NMR (101 MHz,  $CDCl_3$ )  $\delta$  140.5, 137.9, 137.3, 135.6,

**(3t) (4-bromophenyl)(methyl)((p-tolylthio)imino)- $\lambda^6$ -sulfanone**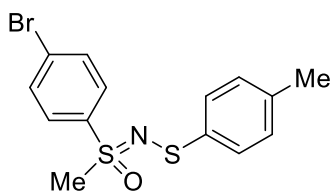

(4-bromophenyl)(methyl)((p-tolylthio)imino)- $\lambda^6$ -sulfanone

Chemical Formula:  $C_{14}H_{14}BrNOS_2$

Exact Mass: 354.9700

Molecular Weight: 356.2960

129.4, 129.0, 125.3, 43.8, 21.1.

IR ( $cm^{-1}$ ): 3298, 3082, 3015, 2922, 2864, 1570, 1489, 1387, 1209, 1090, 982, 804, 766, 519.

HRMS (APCI)  $m/z$  calcd for  $C_{14}H_{15}BrNOS_2^+$  (M+H) $^+$  355.9773, found 355.9766.

Following the General Procedure A with (4-bromophenyl)(imino)(methyl)- $\lambda^6$ -sulfanone (46.8 mg, 0.2 mmol) and 4-toluenethiol (49.7 mg, 0.4 mmol), **3t** was obtained as a colorless oil (64.2 mg, 90%).

This target product was purified by column chromatography on silica gel (PE/EA = 3:1).

$^1H$  NMR (400 MHz,  $CDCl_3$ )  $\delta$  7.77 (d,  $J$  = 8.8 Hz, 2H), 7.68 (d,  $J$  = 8.8 Hz, 2H), 7.28 (d,  $J$  = 8.0 Hz, 2H), 7.08 (d,  $J$  = 8.0 Hz, 2H), 3.24 (s, 3H), 2.29 (s, 3H).

$^{13}C$  NMR (101 MHz,  $CDCl_3$ )  $\delta$  137.9, 135.6, 132.8, 130.1,

**(3u) (3-methoxyphenyl)(methyl)((p-tolylthio)imino)- $\lambda^6$ -sulfanone**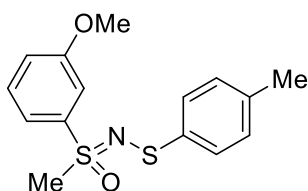

(3-methoxyphenyl)(methyl)((p-tolylthio)imino)- $\lambda^6$ -sulfanone

Chemical Formula:  $C_{15}H_{17}NO_2S_2$

Exact Mass: 307.0701

Molecular Weight: 307.4260

$^{13}C$  NMR (101 MHz,  $CDCl_3$ )  $\delta$  160.1, 139.9, 138.2, 135.2, 130.4, 129.2, 125.0, 120.5, 120.2, 112.7, 55.6, 43.8, 20.9.

IR ( $cm^{-1}$ ): 3437, 3308, 3013, 2922, 1894, 1597, 1483, 1321, 1086, 852, 710, 530.

HRMS (APCI)  $m/z$  calcd for  $C_{15}H_{17}NO_2S_2Na^+$  (M+Na) $^+$  330.0593, found 330.0582.

Following the General Procedure A with imino(3-methoxyphenyl)(methyl)- $\lambda^6$ -sulfanone (37.0 mg, 0.2 mmol) and 4-toluenethiol (49.7 mg, 0.4 mmol), **3u** was obtained as a colorless oil (51.1 mg, 83%).

This target product was purified by column chromatography on silica gel (PE/EA = 3:1).

$^1H$  NMR (400 MHz,  $CDCl_3$ )  $\delta$  7.52 – 7.44 (m, 2H), 7.40 (s, 1H), 7.31 (d,  $J$  = 6.8 Hz, 2H), 7.15 (d,  $J$  = 8.0 Hz, 1H), 7.07 (d,  $J$  = 7.2 Hz, 2H), 3.82 (s, 3H), 3.24 (s, 3H), 2.29 (s, 3H).

**(3v) (3-fluorophenyl)(methyl)((p-tolylthio)imino)- $\lambda^6$ -sulfanone**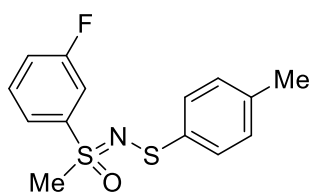

(3-fluorophenyl)(methyl)((p-tolylthio)imino)- $\lambda^6$ -sulfanone

Chemical Formula:  $C_{14}H_{14}FNOS_2$

Exact Mass: 295.0501

Molecular Weight: 295.3904

$^{13}C$  NMR (101 MHz,  $CDCl_3$ )  $\delta$  162.7 (d,  $J$  = 252.8 Hz), 141.1 (d,  $J$  = 6.5 Hz), 137.8, 135.7, 131.2 (d,  $J$  = 7.6 Hz), 129.4, 125.4, 124.2 (d,  $J$  = 3.4 Hz), 116.0 (d,  $J$  = 24.5 Hz), 43.8, 21.0.

$^{19}F$  NMR (376 MHz,  $CDCl_3$ )  $\delta$  -108.83.

IR ( $cm^{-1}$ ): 3298, 3072, 3018, 2924, 1593, 1477, 1431, 1223, 1082, 991, 878, 804, 766, 677, 527.

Following the General Procedure A with (3-fluorophenyl)(imino)(methyl)- $\lambda^6$ -sulfanone (34.6 mg, 0.2 mmol) and 4-toluenethiol (49.7 mg, 0.4 mmol), **3v** was obtained as a colorless oil (49.7 mg, 84%).

This target product was purified by column chromatography on silica gel (PE/EA = 3:1).

$^1H$  NMR (400 MHz,  $CDCl_3$ )  $\delta$  7.72 (d,  $J$  = 8.0 Hz, 1H), 7.64 (d,  $J$  = 7.6 Hz, 1H), 7.58 – 7.50 (m, 1H), 7.37 – 7.33 (m, 1H), 7.30 (d,  $J$  = 8.4 Hz, 2H), 7.09 (d,  $J$  = 8.0 Hz, 2H), 3.26 (s, 3H), 2.30 (s, 3H).

HRMS (APCI)  $m/z$  calcd for  $C^{14}H^{15}FNOS_2^+$  ( $M+H$ ) $^+$  296.0574, found 296.0566.

**(3w) (3-chlorophenyl)(methyl)((p-tolylthio)imino)- $\lambda^6$ -sulfanone**

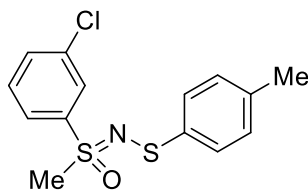

(3-chlorophenyl)(methyl)((p-tolylthio)imino)- $\lambda^6$ -sulfanone

Chemical Formula:  $C_{14}H_{14}ClNOS_2$

Exact Mass: 311.0205

Molecular Weight: 311.8420

Following the General Procedure A with (3-chlorophenyl)(imino)(methyl)- $\lambda^6$ -sulfanone (37.9 mg, 0.2 mmol) and 4-toluenethiol (49.7 mg, 0.4 mmol), **3w** was obtained as a colorless oil (51.1 mg, 82%).

This target product was purified by column chromatography on silica gel (PE/EA = 3:1).

$^1H$  NMR (400 MHz,  $CDCl_3$ )  $\delta$  7.92 – 7.87 (m, 1H), 7.80 (d,  $J$  = 7.6 Hz, 1H), 7.60 (d,  $J$  = 6.8 Hz, 1H), 7.49 (t,  $J$  = 8.0 Hz, 1H), 7.29 (d,  $J$  = 8.4 Hz, 2H), 7.08 (d,  $J$  = 8.0 Hz, 2H), 3.25 (s, 3H), 2.29 (s, 3H).

$^{13}C$  NMR (101 MHz,  $CDCl_3$ )  $\delta$  140.7, 137.7, 135.7, 135.7, 133.8, 130.7, 129.4, 128.6, 126.6, 125.6, 43.8, 21.1.

IR ( $cm^{-1}$ ): 3298, 3065, 3017, 2922, 2864, 1701, 1576, 1489, 1466, 1406, 1317, 1217, 1119, 986, 783, 675, 517.

HRMS (APCI)  $m/z$  calcd for  $C_{14}H_{15}ClNOS_2^+$  ( $M+H$ ) $^+$  312.0278, found 312.0270.

**(3x) (3,5-dichlorophenyl)(methyl)((p-tolylthio)imino)- $\lambda^6$ -sulfanone**

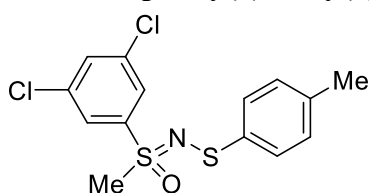

(3,5-dichlorophenyl)(methyl)((p-tolylthio)imino)- $\lambda^6$ -sulfanone

Chemical Formula:  $C_{14}H_{13}Cl_2NOS_2$

Exact Mass: 344.9816

Molecular Weight: 346.2840

Following the General Procedure A with (3,5-dichlorophenyl)(imino)(methyl)- $\lambda^6$ -sulfanone (44.8 mg, 0.2 mmol) and 4-toluenethiol (49.7 mg, 0.4 mmol), **3x** was obtained as a colorless oil (53.4 mg, 77%).

This target product was purified by column chromatography on silica gel (PE/EA = 3:1).

$^1H$  NMR (400 MHz,  $CDCl_3$ )  $\delta$  7.77 – 7.72 (m, 2H), 7.58 (s, 1H), 7.28 (d,  $J$  = 8.0 Hz, 2H), 7.08 (d,  $J$  = 8.0 Hz, 2H), 3.25 (s, 3H), 2.30 (s, 3H).

$^{13}C$  NMR (101 MHz,  $CDCl_3$ )  $\delta$  142.0, 137.1, 136.4,

136.2, 133.6, 129.4, 127.0, 126.2, 43.8, 21.1.

IR ( $cm^{-1}$ ): 3300, 3074, 3018, 2922, 1568, 1491, 1416, 1217, 1142, 1096, 1003, 868, 802, 702, 665, 513.

HRMS (APCI)  $m/z$  calcd for  $C_{14}H_{14}Cl_2NOS_2^+$  ( $M+H$ ) $^+$  345.9888, found 345.9889.

**(3y) cyclopropyl(phenyl)((p-tolylthio)imino)- $\lambda^6$ -sulfanone**

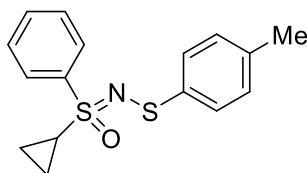

cyclopropyl(phenyl)((p-tolylthio)imino)- $\lambda^6$ -sulfanone

Chemical Formula:  $C_{16}H_{17}NOS_2$

Exact Mass: 303.0752

Molecular Weight: 303.4380

Following the General Procedure A with cyclopropyl(imino)(phenyl)- $\lambda^6$ -sulfanone (36.3 mg, 0.2 mmol) and 4-toluenethiol (49.7 mg, 0.4 mmol), **3y** was obtained as a colorless oil (47.8 mg, 79%).

This target product was purified by column chromatography on silica gel (PE/EA = 3:1).

$^1H$  NMR (400 MHz,  $CDCl_3$ )  $\delta$  7.88 (d,  $J$  = 8.0 Hz, 2H), 7.61 (d,  $J$  = 8.0 Hz, 1H), 7.54 (t,  $J$  = 7.2 Hz, 2H), 7.28 (d,  $J$  = 6.8 Hz, 2H), 7.06 (d,  $J$  = 7.6 Hz, 2H), 2.71 – 2.59 (m, 1H), 2.28 (s, 3H), 1.70 – 1.60 (m, 1H), 1.23 – 1.09 (m, 2H), 0.97 – 0.85 (m, 1H).

$^{13}\text{C}$  NMR (101 MHz,  $\text{CDCl}_3$ )  $\delta$  139.2, 138.8, 135.0, 133.3, 129.3, 129.2, 128.5, 124.8, 33.0, 21.0, 7.0, 5.6.

IR ( $\text{cm}^{-1}$ ): 3057, 3031, 2920, 1489, 1445, 1215, 1186, 1094, 982, 885, 806, 735, 689, 533.

HRMS (APCI)  $m/z$  calcd for  $\text{C}_{16}\text{H}_{18}\text{NOS}_2^+$  ( $\text{M}+\text{H}$ ) $^+$  304.0824, found 304.0819.

### (3z) ethyl(phenyl)((p-tolylthio)imino)- $\lambda^6$ -sulfanone

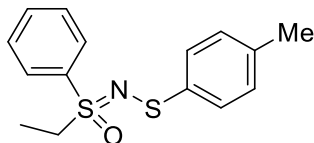

ethyl(phenyl)((p-tolylthio)imino)- $\lambda^6$ -sulfanone

Chemical Formula:  $\text{C}_{15}\text{H}_{17}\text{NOS}_2$

Exact Mass: 291.0752

Molecular Weight: 291.4270

Following the General Procedure A with ethyl(imino)(phenyl)- $\lambda^6$ -sulfanone (33.8 mg, 0.2 mmol) and 4-toluenethiol (49.7 mg, 0.4 mmol), **3z** was obtained as a colorless oil (48.4 mg, 83%).

This target product was purified by column chromatography on silica gel (PE/EA = 3:1).

$^1\text{H}$  NMR (400 MHz,  $\text{CDCl}_3$ )  $\delta$  7.88 (d,  $J$  = 7.2 Hz, 2H),

7.64 (t,  $J$  = 7.6 Hz, 1H), 7.55 (t,  $J$  = 8.0 Hz, 2H), 7.31 (d,  $J$

= 8.0 Hz, 2H), 7.07 (d,  $J$  = 8.0 Hz, 2H), 3.52 – 3.40 (m, 1H), 3.39 – 3.27 (m, 1H), 2.28 (s, 3H), 1.27 (t,  $J$  = 7.6 Hz, 3H).

$^{13}\text{C}$  NMR (101 MHz,  $\text{CDCl}_3$ )  $\delta$  138.7, 136.8, 135.1, 133.6, 129.4, 129.3, 128.6, 124.9, 50.2, 21.0, 7.8.

IR ( $\text{cm}^{-1}$ ): 3059, 2976, 2937, 2872, 1491, 1447, 1204, 1094, 970, 804, 731, 689, 544.

HRMS (APCI)  $m/z$  calcd for  $\text{C}_{15}\text{H}_{17}\text{NOS}_2\text{Na}^+$  ( $\text{M}+\text{Na}$ ) $^+$  314.0644, found 314.0635.

### (3za) methyl(pyridin-2-yl)((p-tolylthio)imino)- $\lambda^6$ -sulfanone

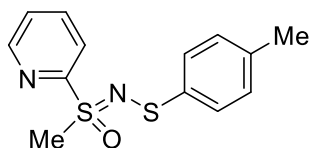

methyl(pyridin-2-yl)((p-tolylthio)imino)- $\lambda^6$ -sulfanone

Chemical Formula:  $\text{C}_{13}\text{H}_{14}\text{N}_2\text{OS}_2$

Exact Mass: 278.0548

Molecular Weight: 278.3880

Following the General Procedure A with imino(methyl)(pyridin-2-yl)- $\lambda^6$ -sulfanone (31.2 mg, 0.2 mmol) and 4-toluenethiol (49.7 mg, 0.4 mmol), **3za** was obtained as a colorless oil (34.3 mg, 62%).

This target product was purified by column chromatography on silica gel (PE/EA = 3:1).

$^1\text{H}$  NMR (400 MHz,  $\text{CDCl}_3$ )  $\delta$  8.67 (d,  $J$  = 4.4 Hz, 1H), 8.15 (d,  $J$  = 7.6 Hz, 1H), 7.90 (t,  $J$  = 7.6 Hz, 1H), 7.51 – 7.43 (m, 1H), 7.20 (d,  $J$  = 8.0 Hz, 2H), 7.02 (d,  $J$  = 8.0 Hz, 2H), 3.45 (s, 3H), 2.26 (s, 3H).

$^{13}\text{C}$  NMR (101 MHz,  $\text{CDCl}_3$ )  $\delta$  156.9, 150.1, 138.0, 137.8, 135.0, 129.2, 127.1, 124.5, 123.7, 39.5, 21.0.

IR ( $\text{cm}^{-1}$ ): 3294, 3015, 2924, 2866, 1578, 1489, 1425, 1312, 1213, 1084, 989, 804, 758, 689, 615, 523.

HRMS (APCI)  $m/z$  calcd for  $\text{C}_{13}\text{H}_{14}\text{N}_2\text{OS}_2\text{Na}^+$  ( $\text{M}+\text{Na}$ ) $^+$  301.0440, found 301.0430.

### (3zb) diphenyl((p-tolylthio)imino)- $\lambda^6$ -sulfanone (CAS: 91378-34-6)<sup>[11]</sup>

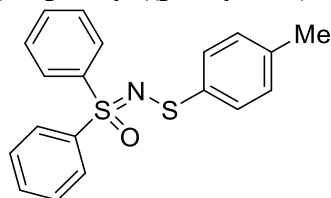

diphenyl((p-tolylthio)imino)- $\lambda^6$ -sulfanone

Chemical Formula:  $\text{C}_{19}\text{H}_{17}\text{NOS}_2$

Exact Mass: 339.0752

Molecular Weight: 339.4710

Following the General Procedure A with iminodiphenyl- $\lambda^6$ -sulfanone (43.5 mg, 0.2 mmol) and 4-toluenethiol (49.7 mg, 0.4 mmol), **3zb** was obtained as a colorless oil (52.7 mg, 78%).

This target product was purified by column chromatography on silica gel (PE/EA = 3:1).

$^1\text{H}$  NMR (400 MHz,  $\text{CDCl}_3$ )  $\delta$  8.00 (d,  $J$  = 7.6 Hz, 4H), 7.53 (d,  $J$  = 7.2 Hz, 2H), 7.48 (t,  $J$  = 7.6 Hz, 4H), 7.35 (d,  $J$  = 8.0 Hz, 2H), 7.06 (d,  $J$  = 8.0 Hz, 2H), 2.28 (s, 3H).

$^{13}\text{C}$  NMR (101 MHz,  $\text{CDCl}_3$ )  $\delta$  140.1, 138.3, 135.2, 133.2,

129.3, 129.3, 128.5, 125.2, 21.1.

**(3zc) diethyl((p-tolylthio)imino)-λ<sup>6</sup>-sulfanone**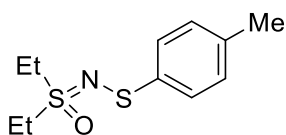diethyl((p-tolylthio)imino)-λ<sup>6</sup>-sulfanoneChemical Formula: C<sub>11</sub>H<sub>17</sub>NOS<sub>2</sub>

Exact Mass: 243.0752

Molecular Weight: 243.3830

Following the General Procedure A with diethyl(imino)-λ<sup>6</sup>-sulfanone (24.2 mg, 0.2 mmol) and 4-toluenethiol (49.7 mg, 0.4 mmol), **3zc** was obtained as a colorless oil (36.5 mg, 75%).

This target product was purified by column chromatography on silica gel (PE/EA = 3:1).

<sup>1</sup>H NMR (400 MHz, CDCl<sub>3</sub>) δ 7.32 – 7.24 (m, 2H), 7.09 (d, *J* = 8.0 Hz, 2H), 3.36 – 3.09 (m, 4H), 2.29 (s, 3H), 1.40 (t, *J* = 7.2 Hz, 6H).

<sup>13</sup>C NMR (101 MHz, CDCl<sub>3</sub>) δ 141.0, 138.5, 133.9, 130.6, 129.6, 128.5, 128.4, 125.1, 43.8.

IR (cm<sup>-1</sup>): 3275, 2974, 2937, 1491, 1454, 1408, 1248, 1198, 1013, 806, 714, 490.

HRMS (APCI) *m/z* calcd for C<sub>11</sub>H<sub>17</sub>NOS<sub>2</sub>Na<sup>+</sup> (M+Na)<sup>+</sup> 266.0644, found 266.0637.

**(3zd) N-(morpholino(oxo)(phenyl)-λ<sup>6</sup>-sulfaneylidene)-S-(p-tolyl)thiohydroxylamine**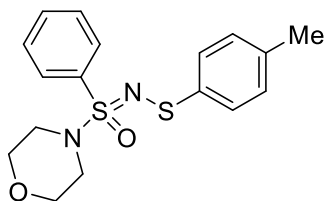N-(morpholino(oxo)(phenyl)-λ<sup>6</sup>-sulfaneylidene)-

S-(p-tolyl)thiohydroxylamine

Chemical Formula: C<sub>17</sub>H<sub>20</sub>N<sub>2</sub>O<sub>2</sub>S<sub>2</sub>

Exact Mass: 348.0966

Molecular Weight: 348.4790

Following the General Procedure A with 4-(phenylsulfonimidoyl)morpholine (45.2 mg, 0.2 mmol) and 4-toluenethiol (49.7 mg, 0.4 mmol), **3zd** was obtained as a colorless oil (55.4 mg, 80%).

This target product was purified by column chromatography on silica gel (PE/EA = 3:1).

<sup>1</sup>H NMR (400 MHz, CDCl<sub>3</sub>) δ 7.90 (d, *J* = 7.2 Hz, 2H), 7.65 – 7.58 (m, 1H), 7.57 – 7.50 (m, 2H), 7.37 (d, *J* = 8.0 Hz, 1H), 7.15 – 7.02 (m, 3H), 3.73 – 3.63 (m, 4H), 3.06 – 2.94 (m, 4H), 2.29 (s, 3H).

<sup>13</sup>C NMR (101 MHz, CDCl<sub>3</sub>) δ 137.7, 135.4, 134.7, 133.1, 129.4, 129.1, 128.1, 125.4, 66.1, 46.7, 21.1.

IR (cm<sup>-1</sup>): 2963, 2916, 2854, 1489, 1445, 1242, 1111, 993, 926, 806, 739, 690, 577, 523.

HRMS (APCI) *m/z* calcd for C<sub>17</sub>H<sub>21</sub>N<sub>2</sub>O<sub>2</sub>S<sub>2</sub><sup>+</sup> (M+H)<sup>+</sup> 349.1039, found 349.1031.

**(3ze) N-(morpholino(oxo)(p-tolyl)-λ<sup>6</sup>-sulfaneylidene)-S-(p-tolyl)thiohydroxylamine**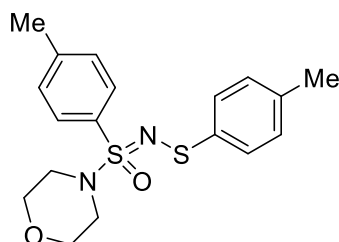N-(morpholino(oxo)(p-tolyl)-λ<sup>6</sup>-sulfaneylidene)-

S-(p-tolyl)thiohydroxylamine

Chemical Formula: C<sub>18</sub>H<sub>22</sub>N<sub>2</sub>O<sub>2</sub>S<sub>2</sub>

Exact Mass: 362.1123

Molecular Weight: 362.5060

Following the General Procedure A with 4-(4-methylphenylsulfonimidoyl)morpholine (48.1 mg, 0.2 mmol) and 4-toluenethiol (49.7 mg, 0.4 mmol), **3ze** was obtained as a colorless oil (59.4 mg, 82%).

This target product was purified by column chromatography on silica gel (PE/EA = 3:1).

<sup>1</sup>H NMR (400 MHz, CDCl<sub>3</sub>) δ 7.77 (d, *J* = 7.6 Hz, 2H), 7.35 (t, *J* = 8.8 Hz, 4H), 7.13 – 7.03 (m, 2H), 3.74 – 3.63 (m, 4H), 3.07 – 2.91 (m, 4H), 2.44 (s, 3H), 2.29 (s, 3H).

<sup>13</sup>C NMR (101 MHz, CDCl<sub>3</sub>) δ 144.0, 137.8, 135.3, 131.5, 129.7, 129.3, 128.2, 125.3, 66.1, 46.7, 21.6, 21.0.

IR (cm<sup>-1</sup>): 2966, 2918, 2856, 1491, 1452, 1240, 1113, 989, 935, 810, 737, 521.

HRMS (APCI) *m/z* calcd for C<sub>18</sub>H<sub>22</sub>N<sub>2</sub>O<sub>2</sub>S<sub>2</sub><sup>+</sup> (M+H)<sup>+</sup> 363.1195, found 363.1187.

**(3zf) N-((4-chlorophenyl)(morpholino)(oxo)-λ<sup>6</sup>-sulfaneylidene)-S-(p-tolyl)thiohydroxylamine**

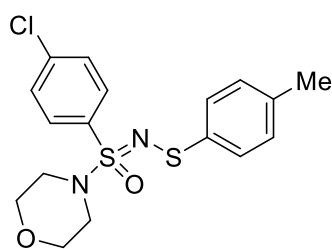

*N*-((4-chlorophenyl)(morpholino)(oxo)- $\lambda^6$ -sulfaneylidene)-*S*-(*p*-tolyl)thiohydroxylamine

Chemical Formula:  $C_{17}H_{19}ClN_2O_2S_2$

Exact Mass: 382.0576

Molecular Weight: 382.9210

129.5, 129.4, 129.4, 125.4, 66.1, 46.7, 21.1.

IR ( $cm^{-1}$ ): 2968, 2918, 2858, 1568, 1493, 1452, 1393, 1244, 1113, 1084, 989, 937, 810, 768, 717, 530.

HRMS (APCI)  $m/z$  calcd for  $C_{17}H_{20}ClN_2O_2S_2^+$  ( $M+H$ ) $^+$  383.0649, found 383.0640.

Following the General Procedure A with 4-(4-chlorophenylsulfonimidoyl)morpholine (52.1 mg, 0.2 mmol) and 4-toluenethiol (49.7 mg, 0.4 mmol), **3zf** was obtained as a colorless oil (53.3 mg, 70%).

This target product was purified by column chromatography on silica gel (PE/EA = 3:1).

$^1H$  NMR (400 MHz,  $CDCl_3$ )  $\delta$  7.83 (d,  $J$  = 8.8 Hz, 2H), 7.51 (d,  $J$  = 8.8 Hz, 2H), 7.35 (d,  $J$  = 8.4 Hz, 2H), 7.09 (d,  $J$  = 8.0 Hz, 2H), 3.74 – 3.67 (m, 4H), 3.07 – 2.93 (m, 4H), 2.29 (s, 3H).

$^{13}C$  NMR (101 MHz,  $CDCl_3$ )  $\delta$  139.8, 137.3, 135.7, 133.,

### (3zg) *N*-(morpholino(naphthalen-2-yl)(oxo)- $\lambda^6$ -sulfaneylidene)-*S*-(*p*-tolyl)thiohydroxylamine

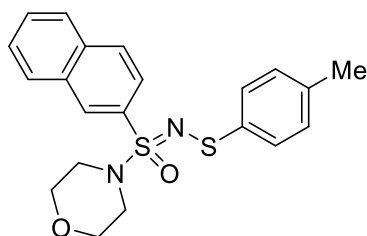

*N*-(morpholino(naphthalen-2-yl)(oxo)- $\lambda^6$ -sulfaneylidene)-*S*-(*p*-tolyl)thiohydroxylamine

Chemical Formula:  $C_{21}H_{22}N_2O_2S_2$

Exact Mass: 398.1123

Molecular Weight: 398.5390

$^{13}C$  NMR (101 MHz,  $CDCl_3$ )  $\delta$  137.7, 135.5, 135.0, 132.2, 131.8, 129.6, 129.4, 129.4, 129.2, 129.1, 128.0, 127.7, 125.5, 123.3, 66.2, 46.8, 21.1.

IR ( $cm^{-1}$ ): 2966, 2916, 2856, 1489, 1452, 1248, 1113, 1074, 1007, 932, 804, 731, 636, 480.

HRMS (APCI)  $m/z$  calcd for  $C_{21}H_{22}N_2O_2S_2^+$  ( $M+H$ ) $^+$  399.1195, found 399.1188.

Following the General Procedure A with 4-(naphthalene-2-sulfonimidoyl)morpholine (55.3 mg, 0.2 mmol) and 4-toluenethiol (49.7 mg, 0.4 mmol), **3zg** was obtained as a colorless oil (59.7 mg, 75%).

This target product was purified by column chromatography on silica gel (PE/EA = 3:1).

$^1H$  NMR (400 MHz,  $CDCl_3$ )  $\delta$  8.53 – 8.45 (m, 1H), 7.98 (d,  $J$  = 8.4 Hz, 2H), 7.92 (d,  $J$  = 8.0 Hz, 1H), 7.88 (d,  $J$  = 8.4 Hz, 1H), 7.70 – 7.57 (m, 2H), 7.40 (d,  $J$  = 8.0 Hz, 2H), 7.14 – 7.07 (m, 2H), 3.75 – 3.64 (m, 4H), 3.16 – 3.00 (m, 4H), 2.29 (s, 3H).

### (3zh) *N*-(oxo(phenyl)(pyrrolidin-1-yl)- $\lambda^6$ -sulfaneylidene)-*S*-(*p*-tolyl)thiohydroxylamine

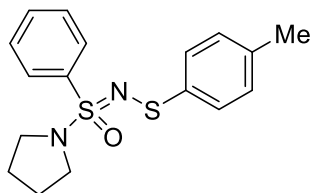

*N*-(oxo(phenyl)(pyrrolidin-1-yl)- $\lambda^6$ -sulfaneylidene)-*S*-(*p*-tolyl)thiohydroxylamine

Chemical Formula:  $C_{17}H_{20}N_2OS_2$

Exact Mass: 332.1017

Molecular Weight: 332.4800

4H).

$^{13}C$  NMR (101 MHz,  $CDCl_3$ )  $\delta$  138.3, 136.5, 134.9, 132.7, 129.3, 129.0, 128.0, 124.8, 48.6, 25.4, 21.0.  
IR ( $cm^{-1}$ ): 3061, 2974, 2874, 1489, 1445, 1240, 1099, 1013, 804, 748, 690, 581.

Following the General Procedure A with 1-(phenylsulfonimidoyl)pyrrolidine (42.1 mg, 0.2 mmol) and 4-toluenethiol (49.7 mg, 0.4 mmol), **3zh** was obtained as a colorless oil (47.3 mg, 71%).

This target product was purified by column chromatography on silica gel (PE/EA = 3:1).

$^1H$  NMR (400 MHz,  $CDCl_3$ )  $\delta$  7.97 (d,  $J$  = 8.0 Hz, 2H), 7.58 (d,  $J$  = 7.2 Hz, 1H), 7.56 – 7.49 (m, 2H), 7.35 (d,  $J$  = 8.0 Hz, 1H), 7.14 – 7.10 (m, 1H), 7.09 – 7.00 (m, 2H), 3.33 – 3.18 (m, 4H), 2.28 (s, 3H), 1.81 – 1.69 (m,

HRMS (APCI)  $m/z$  calcd for  $C_{17}H_{21}N_2OS_2^+$  ( $M+H$ )<sup>+</sup> 333.1090, found 333.1082.

**(6a) N-(methyl(oxo)(phenyl)- $\lambda^6$ -sulfaneylidene)-P,P-diphenylphosphinic amide (CAS: 2384177-23-3)<sup>[12]</sup>**

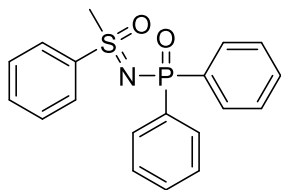

*N*-(methyl(oxo)(phenyl)- $\lambda^6$ -sulfaneylidene)-*P,P*-diphenylphosphinic amide

Chemical Formula:  $C_{19}H_{18}NO_2PS$

Exact Mass: 355.0796

Molecular Weight: 355.3918

131.0, 129.4, 128.3, 128.2, 127.2, 48.02, 48.00.

<sup>31</sup>P NMR (162 MHz,  $CDCl_3$ )  $\delta$  18.21.

Following the General Procedure B with sulfoximine (31.0 mg, 0.2 mmol) and diphenylphosphine oxide (80.9 mg, 0.4 mmol), **6a** was obtained as a yellow oil (57.5 mg, 81%).

This target product was purified by column chromatography on silica gel (PE/EA = 1:1).

<sup>1</sup>H NMR (400 MHz,  $CDCl_3$ )  $\delta$  8.03 (d,  $J$  = 8.0 Hz, 2H), 7.98 – 7.84 (m, 4H), 7.66 – 7.60 (m, 1H), 7.58 – 7.51 (m, 2H), 7.49 – 7.32 (m, 6H), 3.40 (s, 3H).

<sup>13</sup>C NMR (101 MHz,  $CDCl_3$ )  $\delta$  141.3, 141.2, 136.9, 136.6, 135.6, 135.2, 133.6, 131.3, 131.21, 131.16, 131.1,

**(6b) N-(morpholino(oxo)(phenyl)- $\lambda^6$ -sulfaneylidene)-P,P-diphenylphosphinic amide**

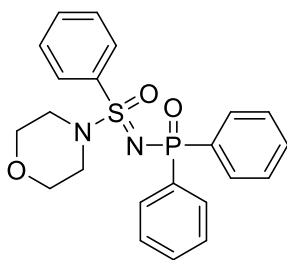

*N*-(morpholino(oxo)(phenyl)- $\lambda^6$ -sulfaneylidene)-*P,P*-diphenylphosphinic amide

Chemical Formula:  $C_{22}H_{23}N_2O_3PS$

Exact Mass: 426.1167

Molecular Weight: 426.4708

129.1, 128.3, 128.2, 128.1, 128.0, 127.7, 66.0, 46.6.

<sup>31</sup>P NMR (162 MHz,  $CDCl_3$ )  $\delta$  14.48.

IR ( $cm^{-1}$ ): 3058, 2966, 2858, 1645, 1439, 1288, 1259, 1171, 1111, 937, 737, 694, 598, 542.

HRMS (APCI)  $m/z$  calcd for  $C_{22}H_{24}N_2O_3PS$  ( $M+H$ )<sup>+</sup> 427.1240, found 427.1235.

Following the General Procedure B with 4-(phenylsulfonimidoyl)morpholine (45.2 mg, 0.2 mmol) and diphenylphosphine oxide (80.9 mg, 0.4 mmol), **6b** was obtained as a yellow oil (67.7 mg, 76%).

This target product was purified by column chromatography on silica gel (PE/EA = 1:1).

<sup>1</sup>H NMR (400 MHz,  $CDCl_3$ )  $\delta$  7.97 – 7.80 (m, 6H), 7.64 – 7.58 (m, 1H), 7.54 (t,  $J$  = 7.6 Hz, 2H), 7.48 – 7.33 (m, 6H), 3.67 – 3.55 (m, 4H), 3.19 – 3.06 (m, 2H), 2.98 – 2.82 (m, 2H).

<sup>13</sup>C NMR (101 MHz,  $CDCl_3$ )  $\delta$  136.2, 135.8, 135.7, 134.8, 134.8, 133.2, 131.5, 131.4, 131.3, 131.2,

**(6c) N-(morpholino(oxo)(p-tolyl)- $\lambda^6$ -sulfaneylidene)-P,P-diphenylphosphinic amide**

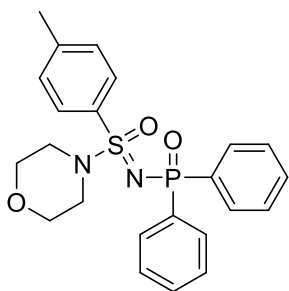

*N*-(morpholino(oxo)(*p*-tolyl)- $\lambda^6$ -sulfaneylidene)-*P,P*-diphenylphosphinic amide  
Chemical Formula:  $C_{23}H_{25}N_2O_3PS$   
Exact Mass: 440.13  
Molecular Weight: 440.50

128.1, 128.1, 128.0, 127.8, 66.0, 46.5, 21.5.

$^{31}P$  NMR (162 MHz,  $CDCl_3$ )  $\delta$  14.42.

IR ( $cm^{-1}$ ): 3057, 2966, 2922, 2585, 1593, 1439, 1292, 1169, 1111, 937, 725, 696, 526.

HRMS (APCI)  $m/z$  calcd for  $C_{23}H_{26}N_2O_3PS$  ( $M+H$ ) $^+$  441.1396, found 441.1391.

Following the General Procedure B with 4-(4-methylphenylsulfonimidoyl)morpholine (48.0 mg, 0.2 mmol) and diphenylphosphine oxide (80.9 mg, 0.4 mmol), **6c** was obtained as a yellow oil (63.4 mg, 72%).

This target product was purified by column chromatography on silica gel (PE/EA = 1:1).

$^1H$  NMR (400 MHz,  $CDCl_3$ )  $\delta$  7.96 – 7.82 (m, 4H), 7.74 (d,  $J$  = 7.6 Hz, 2H), 7.48 – 7.29 (m, 8H), 3.65 – 3.53 (m, 4H), 3.18 – 3.03 (m, 2H), 2.94 – 2.80 (m, 2H), 2.42 (s, 3H).

$^{13}C$  NMR (101 MHz,  $CDCl_3$ )  $\delta$  144.1, 136.2, 136.1, 134.8, 132.7, 132.7, 131.5, 131.4, 131.3, 131.2, 129.8, 128.3,

**(6d) N-((4-chlorophenyl)(morpholino)(oxo)- $\lambda^6$ -sulfaneylidene)-*P,P*-diphenylphosphinic amide**

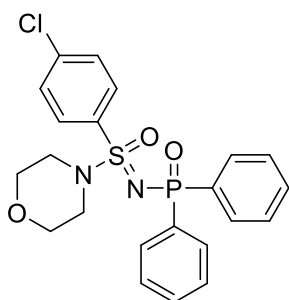

*N*-((4-chlorophenyl)(morpholino)(oxo)- $\lambda^6$ -sulfaneylidene)-*P,P*-diphenylphosphinic amide  
Chemical Formula:  $C_{22}H_{22}ClN_2O_3PS$   
Exact Mass: 460.0777  
Molecular Weight: 460.9128

$^{31}P$  NMR (162 MHz,  $CDCl_3$ )  $\delta$  14.71.

IR ( $cm^{-1}$ ): 3429, 3057, 2966, 2918, 2858, 1577, 1436, 1288, 1178, 1109, 930, 723, 696, 527.

HRMS (APCI)  $m/z$  calcd for  $C_{22}H_{23}ClN_2O_3PS$  ( $M+H$ ) $^+$  461.0850, found 461.0843.

Following the General Procedure B with 4-(4-chlorophenylsulfonimidoyl)morpholine (52.0 mg, 0.2 mmol) and diphenylphosphine oxide (80.9 mg, 0.4 mmol), **6d** was obtained as a yellow oil (60.7 mg, 66%).

This target product was purified by column chromatography on silica gel (PE/EA = 1:1).

$^1H$  NMR (400 MHz,  $CDCl_3$ )  $\delta$  7.94 – 7.84 (m, 4H), 7.81 – 7.75 (m, 2H), 7.51 – 7.47 (m, 2H), 7.46 – 7.33 (m, 6H), 3.67 – 3.54 (m, 4H), 3.16 – 3.05 (m, 2H), 2.95 – 2.86 (m, 2H).

$^{13}C$  NMR (101 MHz,  $CDCl_3$ )  $\delta$  139.9, 135.8, 134.4, 134.3, 131.5, 131.4, 131.4, 131.3, 131.2, 129.4, 129.2, 128.3, 128.2, 128.1, 127.7, 127.6, 66.0, 46.5.

**(6e) N-(morpholino(naphthalen-2-yl)(oxo)- $\lambda^6$ -sulfaneylidene)-*P,P*-diphenylphosphinic amide**

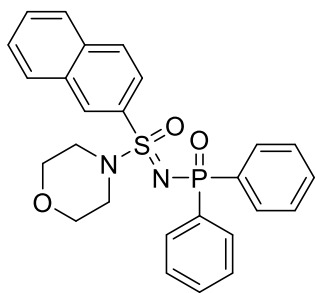

*N*-(morpholino(naphthalen-2-yl)(oxo)- $\lambda^6$ -sulfaneylidene)-*P,P*-diphenylphosphinic amide

Chemical Formula:  $C_{26}H_{25}N_2O_3PS$

Exact Mass: 476.1323

Molecular Weight: 476.5308

Following the General Procedure B with 4-(naphthalene-2-sulfonimidoyl)morpholine (55.2 mg, 0.2 mmol) and diphenylphosphine oxide (80.9 mg, 0.4 mmol), **6e** was obtained as a yellow oil (61.9 mg, 65%).

This target product was purified by column chromatography on silica gel (PE/EA = 1:1).

$^1H$  NMR (400 MHz,  $CDCl_3$ )  $\delta$  8.43 (s, 1H), 8.00 – 7.82 (m, 8H), 7.68 – 7.56 (m, 2H), 7.49 – 7.33 (m, 6H), 3.68 – 3.54 (m, 4H), 3.26 – 3.13 (m, 2H), 3.03 – 2.92 (m, 2H).

$^{13}C$  NMR (101 MHz,  $CDCl_3$ )  $\delta$  136.1, 135.0, 134.8, 134.7, 133.0, 132.9, 132.1, 131.6, 131.5, 131.3, 131.2, 129.4, 129.4, 129.2, 129.2, 128.3, 128.2, 128.0, 128.0, 127.7, 122.8, 66.1, 46.6.

$^{31}P$  NMR (162 MHz,  $CDCl_3$ )  $\delta$  14.56.

IR ( $cm^{-1}$ ): 3057, 2964, 2858, 2220, 1715, 1589, 1439, 1292, 1174, 1113, 1074, 935, 723, 696, 636, 538.

HRMS (APCI)  $m/z$  calcd for  $C_{26}H_{26}N_2O_3PS$  ( $M+H$ ) $^+$  477.1396, found 477.1391.

**(6f) *N*-(oxo(phenyl)(pyrrolidin-1-yl)- $\lambda^6$ -sulfaneylidene)-*P,P*-diphenylphosphinic amide**

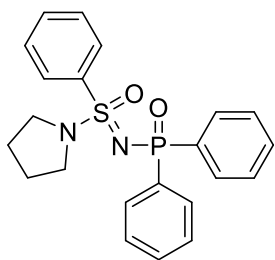

*N*-(oxo(phenyl)(pyrrolidin-1-yl)- $\lambda^6$ -sulfaneylidene)-*P,P*-diphenylphosphinic amide

Chemical Formula:  $C_{22}H_{23}N_2O_2PS$

Exact Mass: 410.1218

Molecular Weight: 410.4718

Following the General Procedure B with 1-(phenylsulfonimidoyl)pyrrolidine (42.0 mg, 0.2 mmol) and diphenylphosphine oxide (80.9 mg, 0.4 mmol), **6f** was obtained as a yellow oil (50.8 mg, 62%).

This target product was purified by column chromatography on silica gel (PE/EA = 1:1).

$^1H$  NMR (400 MHz,  $CDCl_3$ )  $\delta$  7.98 – 7.82 (m, 6H), 7.59 – 7.53 (m, 1H), 7.49 (t,  $J$  = 7.6 Hz, 2H), 7.45 – 7.31 (m, 6H), 3.38 – 3.26 (m, 2H), 3.24 – 3.11 (m, 2H), 1.68 (s, 4H).

$^{13}C$  NMR (101 MHz,  $CDCl_3$ )  $\delta$  138.1, 138.0, 136.5, 135.2, 135.1, 132.7, 131.4, 131.3, 131.3, 131.2, 131.1,

129.0, 128.2, 128.1, 128.0, 127.4, 48.5, 25.2.

$^{31}P$  NMR (162 MHz,  $CDCl_3$ )  $\delta$  14.19.

IR ( $cm^{-1}$ ): 3057, 2976, 2876, 2216, 1717, 1591, 1483, 1439, 1271, 1165, 997, 914, 721, 690, 517.

HRMS (APCI)  $m/z$  calcd for  $C_{22}H_{24}N_2O_2PS$  ( $M+H$ ) $^+$  411.1291, found 411.1285.

**(6g) *N*-(morpholino(oxo)(p-tolyl)- $\lambda^6$ -sulfaneylidene)-*P,P*-di-*p*-tolylphosphinic amide**

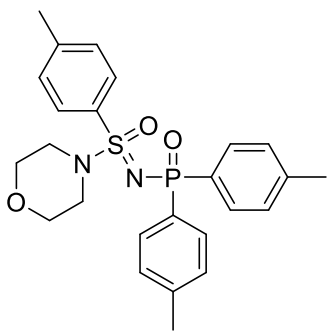

*N*-(morpholino(oxo)(*p*-tolyl)- $\lambda^6$ -sulfaneylidene)-*P,P*-di-*p*-tolylphosphinic amide  
Chemical Formula: C<sub>25</sub>H<sub>29</sub>N<sub>2</sub>O<sub>3</sub>PS  
Exact Mass: 468.1637  
Molecular Weight: 468.5518

Following the General Procedure B with 4-(4-methylphenylsulfonimidoyl)morpholine (48.0 mg, 0.2 mmol) and di-*p*-tolylphosphine oxide (92.0 mg, 0.4 mmol), **6g** was obtained as a yellow oil (65.5 mg, 70%). This target product was purified by column chromatography on silica gel (PE/EA = 1:1).

<sup>1</sup>H NMR (400 MHz, CDCl<sub>3</sub>)  $\delta$  7.81 – 7.71 (m, 6H), 7.32 (d, *J* = 8.0 Hz, 2H), 7.22 – 7.15 (m, 4H), 3.69 – 3.57 (m, 4H), 3.18 – 3.07 (m, 2H), 2.94 – 2.83 (m, 2H), 2.43 (s, 3H), 2.34 (d, *J* = 2.8 Hz, 6H).

<sup>13</sup>C NMR (101 MHz, CDCl<sub>3</sub>)  $\delta$  144.0, 141.4, 133.4, 133.3, 132.9, 132.9, 132.0, 131.5, 131.4, 131.3, 131.2, 129.7, 129.0, 128.8, 128.7, 127.8, 66.1, 46.6, 21.6, 21.5.

<sup>31</sup>P NMR (162 MHz, CDCl<sub>3</sub>)  $\delta$  14.93.

IR (cm<sup>-1</sup>): 3022, 2966, 2920, 2860, 1601, 1452, 1288, 1259, 1169, 1111, 937, 810, 727, 663, 530.

HRMS (APCI) *m/z* calcd for C<sub>25</sub>H<sub>30</sub>N<sub>2</sub>O<sub>3</sub>PS (M+H)<sup>+</sup> 469.1709, found 469.1700.

**(6h) P,P-bis(4-methoxyphenyl)-N-(morpholino(oxo)(*p*-tolyl)- $\lambda^6$ -sulfaneylidene)phosphinic amide**

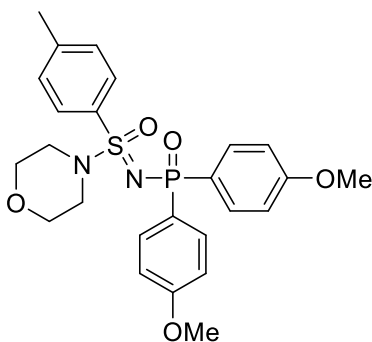

*P,P*-bis(4-methoxyphenyl)-*N*-(morpholino(oxo)(*p*-tolyl)- $\lambda^6$ -sulfaneylidene)phosphinic amide  
Chemical Formula: C<sub>25</sub>H<sub>29</sub>N<sub>2</sub>O<sub>5</sub>PS  
Exact Mass: 500.15  
Molecular Weight: 500.55

Following the General Procedure B with 4-(4-methylphenylsulfonimidoyl)morpholine (48.0 mg, 0.2 mmol) and bis(4-methoxyphenyl)phosphine oxide (104.8 mg, 0.4 mmol), **6h** was obtained as a yellow oil (70.0 mg, 70%).

This target product was purified by column chromatography on silica gel (PE/EA = 1:1).

<sup>1</sup>H NMR (400 MHz, CDCl<sub>3</sub>)  $\delta$  7.88 – 7.71 (m, 6H), 7.32 (d, *J* = 7.6 Hz, 2H), 6.90 (t, *J* = 8.8 Hz, 4H), 3.80 (d, *J* = 4.4 Hz, 6H), 3.70 – 3.56 (m, 4H), 3.19 – 3.07 (m, 2H), 2.98 – 2.84 (m, 2H), 2.43 (s, 3H).

<sup>13</sup>C NMR (101 MHz, CDCl<sub>3</sub>)  $\delta$  161.9, 144.0, 133.3, 133.2, 133.0, 132.9, 132.8, 129.7, 128.3, 128.2, 127.8, 126.8, 113.7, 113.6, 113.4, 66.1, 55.2, 55.2, 46.6, 21.5.

<sup>31</sup>P NMR (162 MHz, CDCl<sub>3</sub>)  $\delta$  14.59.

IR (cm<sup>-1</sup>): 2964, 2916, 2858, 1597, 1500, 1452, 1283, 1254, 1165, 1123, 1026, 937, 802, 723, 667, 530.

HRMS (APCI) *m/z* calcd for C<sub>25</sub>H<sub>30</sub>N<sub>2</sub>O<sub>5</sub>PS (M+H)<sup>+</sup> 501.1608, found 501.1603.

**(6i) P,P-bis(3,5-dimethylphenyl)-N-(morpholino(oxo)(*p*-tolyl)- $\lambda^6$ -sulfaneylidene)phosphinic amide**

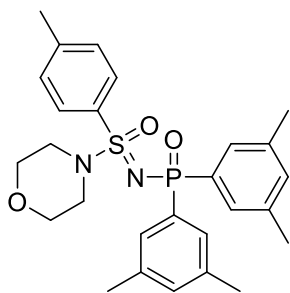

*P,P*-bis(3,5-dimethylphenyl)-*N*-(morpholino(oxo)(*p*-tolyl)- $\lambda^6$ -sulfaneylidene)phosphinic amide  
Chemical Formula:  $C_{27}H_{33}N_2O_3PS$   
Exact Mass: 496.19  
Molecular Weight: 496.61

Following the General Procedure B with 4-(4-methylphenylsulfonimidoyl)morpholine (48.0 mg, 0.2 mmol) and bis(3,5-dimethylphenyl)phosphine oxide (103.2 mg, 0.4 mmol), **6i** was obtained as a yellow oil (67.5 mg, 68%).

This target product was purified by column chromatography on silica gel (PE/EA = 1:1).

$^1H$  NMR (400 MHz,  $CDCl_3$ )  $\delta$  7.74 (d,  $J$  = 7.2 Hz, 2H), 7.49 (t,  $J$  = 14.4 Hz, 4H), 7.32 (d,  $J$  = 7.6 Hz, 2H), 7.05 (d,  $J$  = 8.0 Hz, 2H), 3.70 – 3.55 (m, 4H), 3.15 – 3.04 (m, 2H), 2.95 – 2.86 (m, 2H), 2.43 (s, 4H), 2.30 (d,  $J$  = 7.6 Hz, 12H).

$^{13}C$  NMR (101 MHz,  $CDCl_3$ )  $\delta$  144.0, 137.8, 137.6, 137.6, 137.4, 132.97, 132.95, 132.90, 132.88, 129.7, 129.1, 129.0, 128.9, 128.78, 127.8, 66.1, 46.5, 21.5, 21.3, 21.3.

$^{31}P$  NMR (162 MHz,  $CDCl_3$ )  $\delta$  15.49.

IR ( $cm^{-1}$ ): 2964, 2918, 2856, 2214, 1599, 1452, 1277, 1169, 1113, 937, 852, 725, 692, 588, 528.

HRMS (APCI)  $m/z$  calcd for  $C_{27}H_{34}N_2O_3PS$  ( $M+H$ )<sup>+</sup> 497.2022, found 497.2015.

### (6j) *N*-(morpholino(oxo)(*p*-tolyl)- $\lambda^6$ -sulfaneylidene)-*P,P*-di(naphthalen-2-yl)phosphinic amide

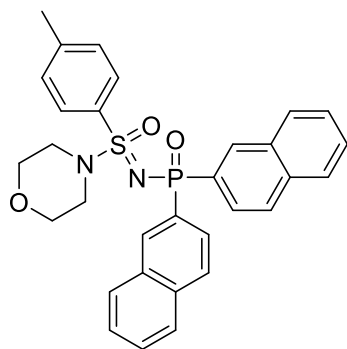

*N*-(morpholino(oxo)(*p*-tolyl)- $\lambda^6$ -sulfaneylidene)-*P,P*-di(naphthalen-2-yl)phosphinic amide  
Chemical Formula:  $C_{31}H_{29}N_2O_3PS$   
Exact Mass: 540.16  
Molecular Weight: 540.62

Following the General Procedure B with 4-(4-methylphenylsulfonimidoyl)morpholine (48.0 mg, 0.2 mmol) and di(naphthalen-2-yl)phosphine oxide (120.8 mg, 0.4 mmol), **6j** was obtained as a yellow oil (75.6 mg, 70%).

This target product was purified by column chromatography on silica gel (PE/EA = 1:1).

$^1H$  NMR (400 MHz,  $CDCl_3$ )  $\delta$  8.59 (d,  $J$  = 14.4 Hz, 1H), 8.51 (d,  $J$  = 14.4 Hz, 1H), 7.94 – 7.87 (m, 4H), 7.87 – 7.74 (m, 6H), 7.55 – 7.46 (m, 4H), 7.31 (d,  $J$  = 7.6 Hz, 2H), 3.69 – 3.54 (m, 4H), 3.22 – 3.12 (m, 2H), 2.98 – 2.87 (m, 2H), 2.41 (s, 3H).

$^{13}C$  NMR (101 MHz,  $CDCl_3$ )  $\delta$  144.2, 134.6, 134.5, 132.8, 132.6, 132.4, 129.8, 129.0, 128.1, 128.0, 127.9, 127.8, 127.7, 127.7, 127.1, 127.0, 126.8, 126.7, 126.5, 66.1, 46.6, 21.5.

$^{31}P$  NMR (162 MHz,  $CDCl_3$ )  $\delta$  14.20.

IR ( $cm^{-1}$ ): 3057, 2964, 2918, 2858, 2220, 1593, 1501, 1452, 1275, 1165, 1111, 1088, 933, 858, 818, 725, 662, 528.

HRMS (APCI)  $m/z$  calcd for  $C_{31}H_{30}N_2O_3PS$  ( $M+H$ )<sup>+</sup> 541.1709, found 541.1703.

### (3aa) 2-methyl-3-(*p*-tolylthio)-1*H*-indole (CAS: 955125-54-9)<sup>[13]</sup>

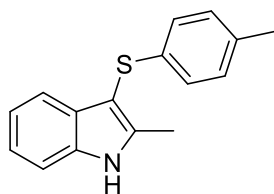

2-methyl-3-(*p*-tolylthio)-1*H*-indole  
Chemical Formula:  $C_{16}H_{15}NS$   
Exact Mass: 253.0925  
Molecular Weight: 253.3630

$^1H$  NMR (400 MHz,  $CDCl_3$ )  $\delta$  8.18 (s, 1H), 7.54 (d,  $J$  = 7.6 Hz, 1H), 7.32 (d,  $J$  = 8.0 Hz, 1H), 7.22 – 7.15 (m, 1H), 7.14 – 7.08 (m, 1H), 6.95 (s, 4H), 2.50 (s, 3H), 2.24 (s, 3H).

$^{13}C$  NMR (101 MHz,  $CDCl_3$ )  $\delta$  140.9, 135.7, 135.4, 134.3, 130.4, 129.5, 125.78, 122.2, 120.7, 119.4, 110.6, 99.9, 20.9, 12.2.

## 12. References

- [1]. Xie, Y.; Zhou, B.; Zhou, S., *ChemistrySelect*. 2 (2017), 1620-1624.
- [2]. Taniguchi, N., *Eur. J. Org. Chem.* 2016 (2016), 2157-2162.
- [3]. Izzo, F.; Schafer, M.; Stockman, R.; Lucking, U., *Chem. – A Eur. J.* 23 (2017), 15189-15193.
- [4]. Kirihaara, M. , Naito, S. , Ishizuka, Y. , Hanai, H. , Noguchi, T., *Tetrahedron Letters*, 52 (2011), 3086-3089.
- [5]. Dhineshkumar, J., Prabhu, K., *Org. Lett.*, 15 (2013), 6062–6065.
- [6]. Chen, C., Niu, P., Shen, Z., Li, M., *J. Electrochem. Soc.* 165 (2018), G67.
- [7]. Mampuy, P., Zhu, Y., Sergeyev, S., Ruijter, E., V.A.Orru, R., V. Doorslaer, S., U.W.Maes, B., *Org. Lett.*, 18 (2016), 2808–2811.
- [8]. Du, H., Tang, R., Deng, C., Liu, Y., Li, J., Zhang, X., *Adv. Synth. Catal.*, 353 (2011), 2739–2748.
- [9]. Kong, D., Ma, D., Wu, P., Bolm, C., *ACS Sustain. Chem. Eng.* 10 (2022), 2863–2867.
- [10]. Wang, H.; Zhang, D.; Cao, M.; Bolm, C., *Synthesis* 51 (2018), 271-275.
- [11]. Yang, L.; Feng, J.; Qiao, M.; Zeng, Q., *Org. Chem. Front.* 5 (2018), 24-28.
- [12]. Tan, M. , Zheng, W. , Yang, L., *Asian J. Org. Chem.* 8 (2019), 2027-2031.
- [13]. Huang, Q.; Peng, X.; Li, H.; He, H.; Liu, L. *Molecules*, 27 (2022), 772.

### **13. Copies of NMR spectra**

<sup>1</sup>H NMR spectra of compound **3a** (400 MHz, CDCl<sub>3</sub>)

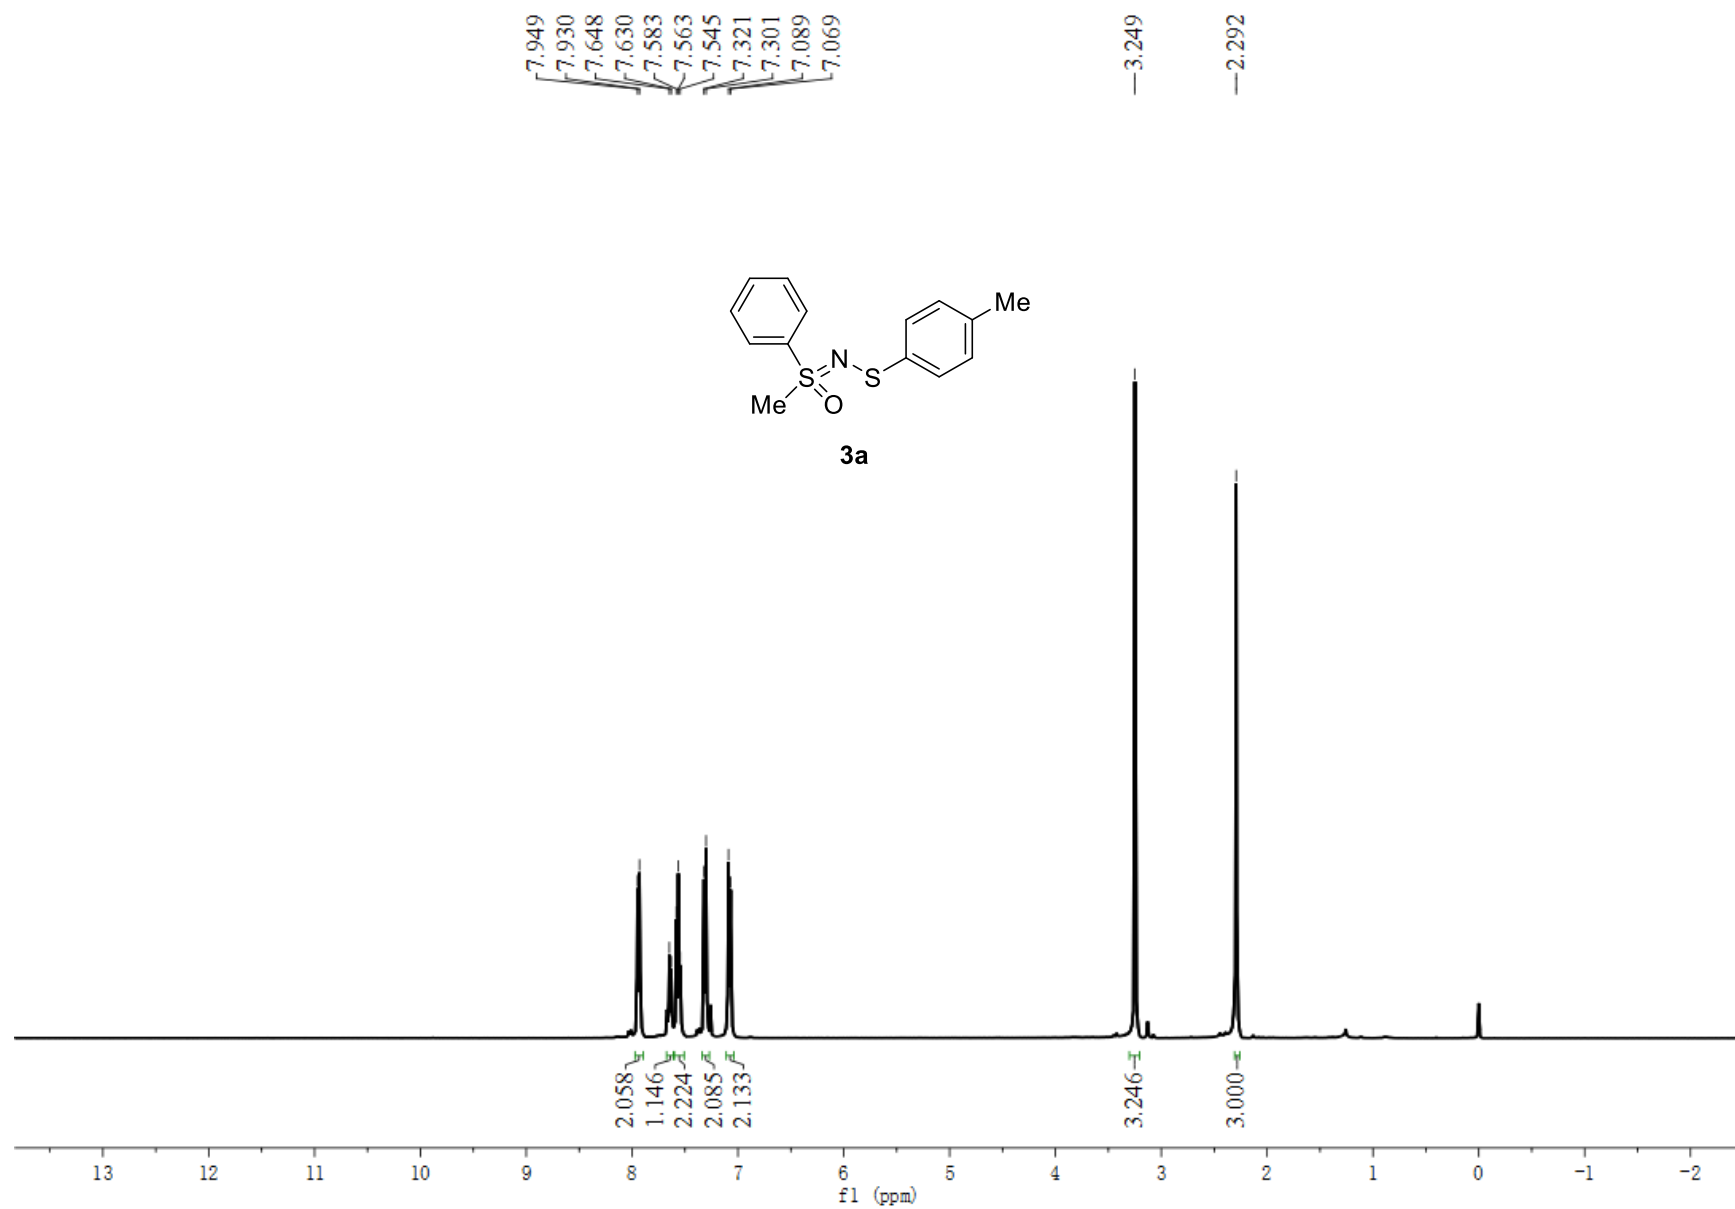

$^{13}\text{C}$  NMR spectra of compound **3a** (101 MHz,  $\text{CDCl}_3$ )

138.780  
138.244  
135.194  
133.574  
129.402  
129.254  
128.385  
124.954

—43.666

—20.958

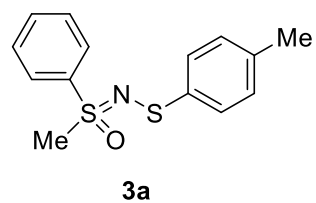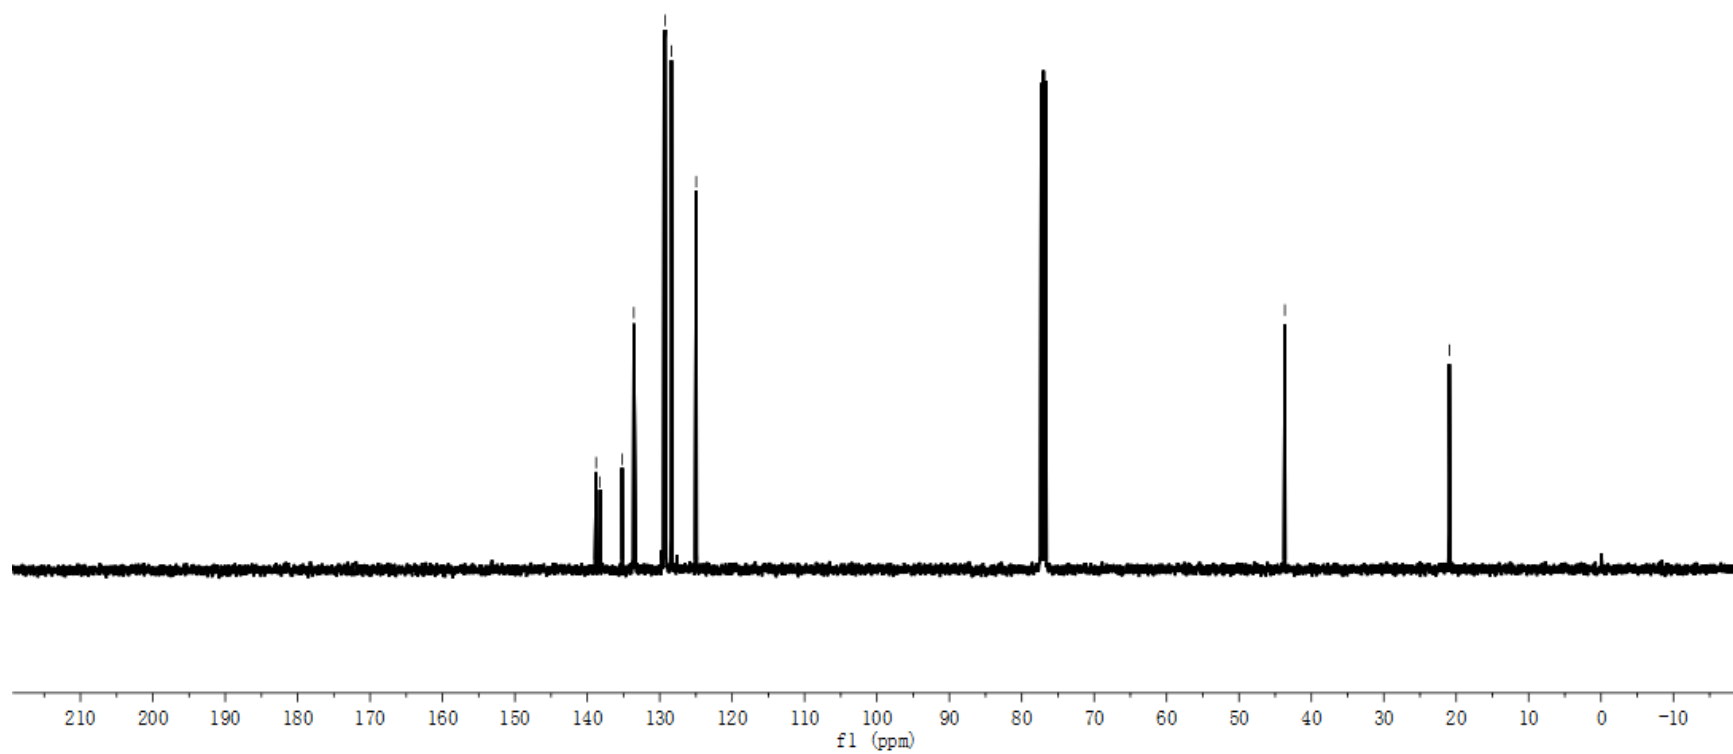

<sup>1</sup>H NMR spectra of compound **3b** (400 MHz, CDCl<sub>3</sub>)

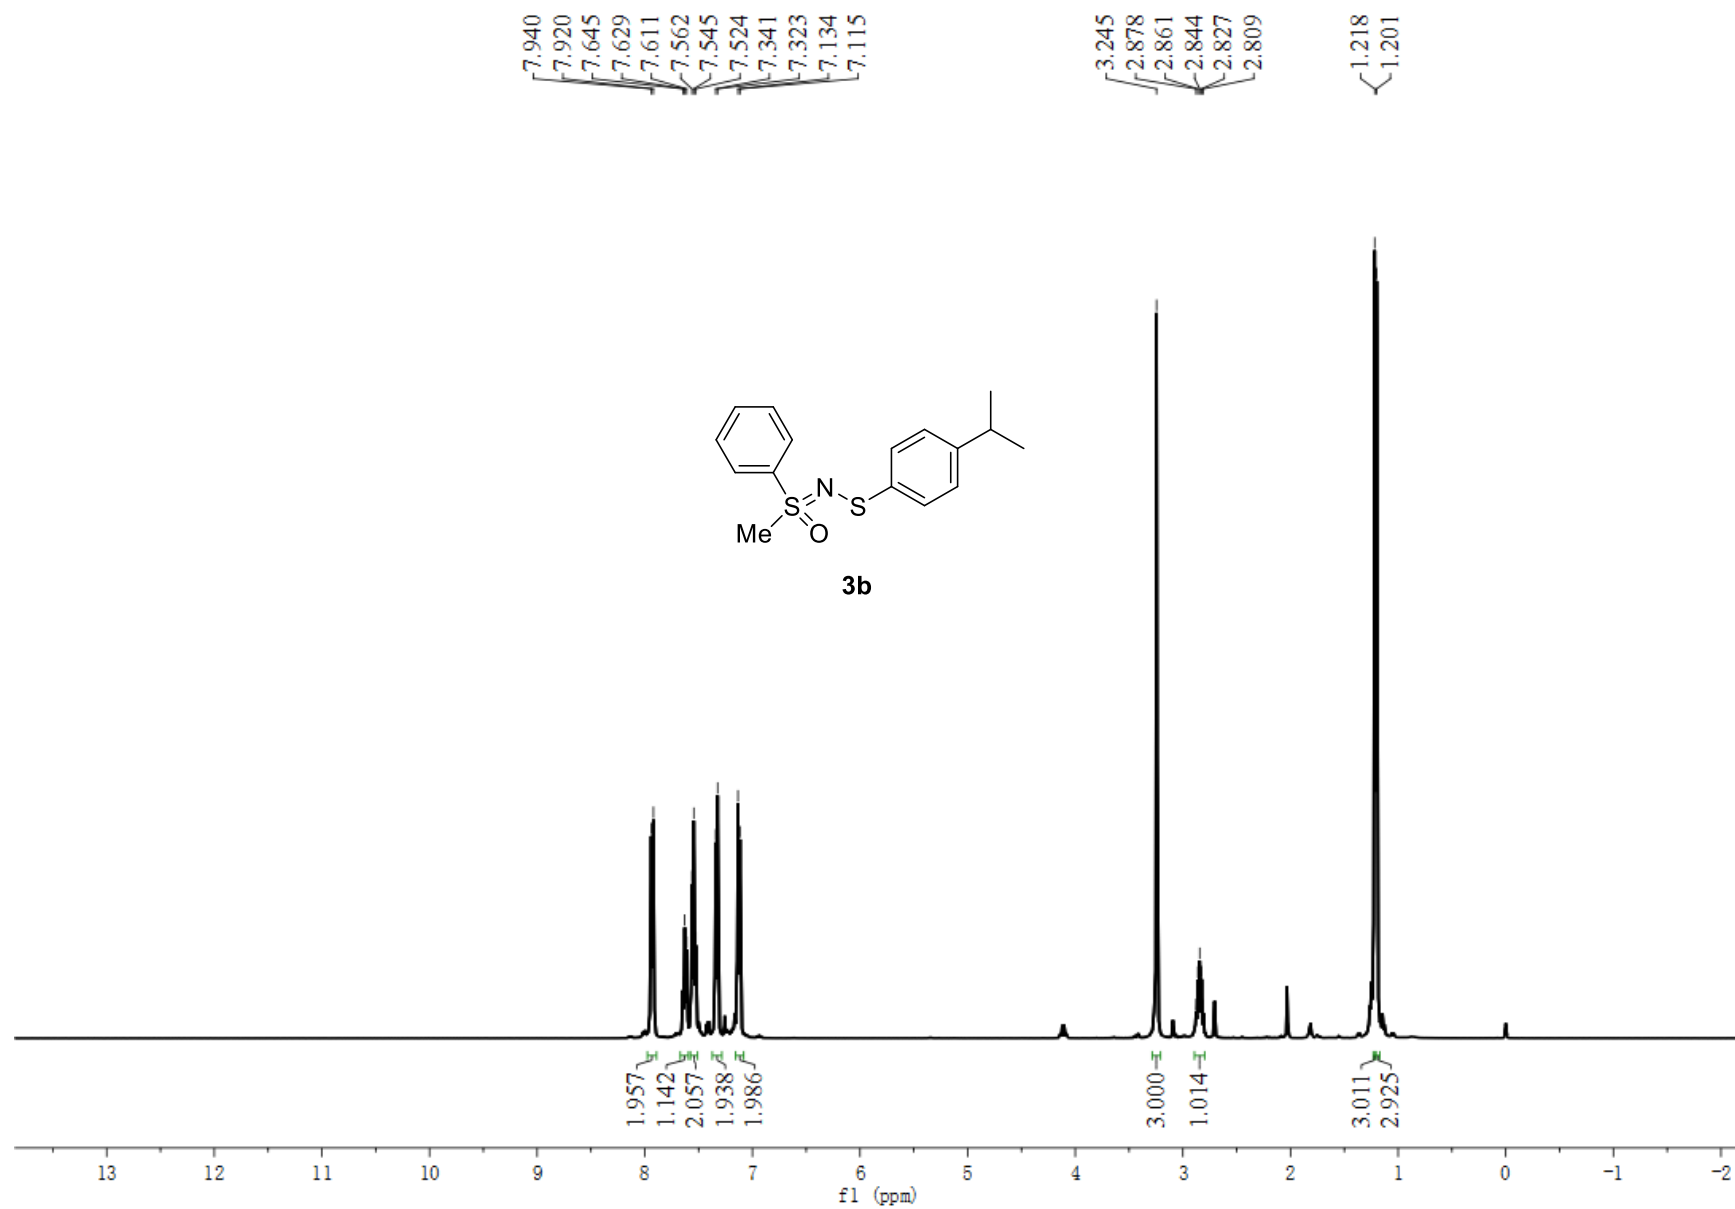

$^{13}\text{C}\{^1\text{H}\}$  spectra of compound **3b** (101 MHz,  $\text{CDCl}_3$ )

146.353  
138.876  
138.636  
133.632  
129.458  
128.466  
126.744  
125.018

43.752  
33.714  
24.022  
24.010

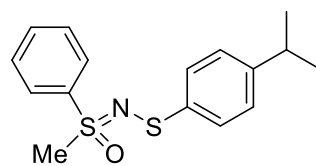

**3b**

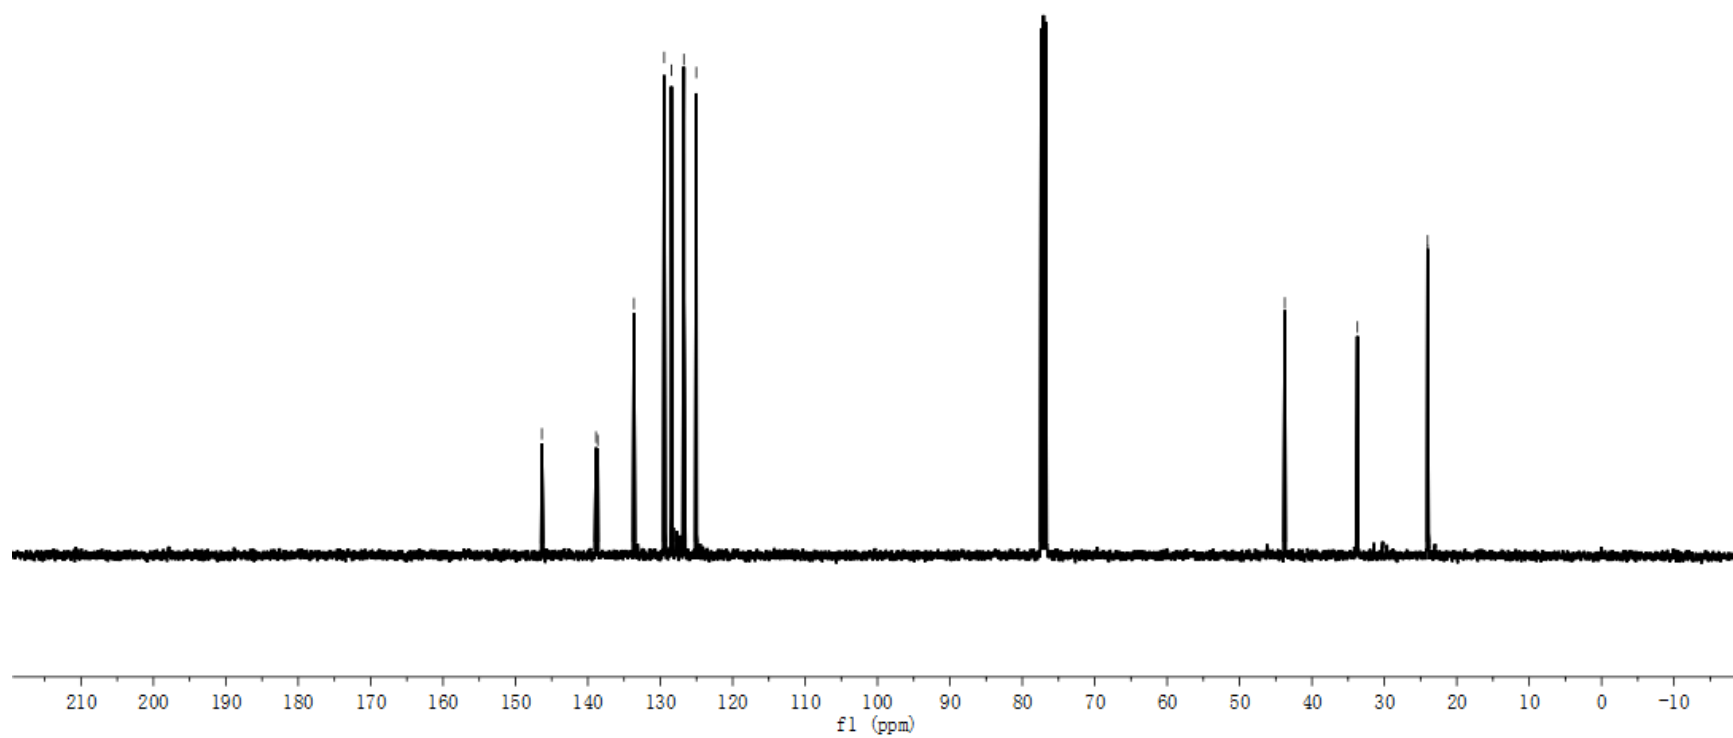

<sup>1</sup>H NMR spectra of compound **3c** (400 MHz, CDCl<sub>3</sub>)

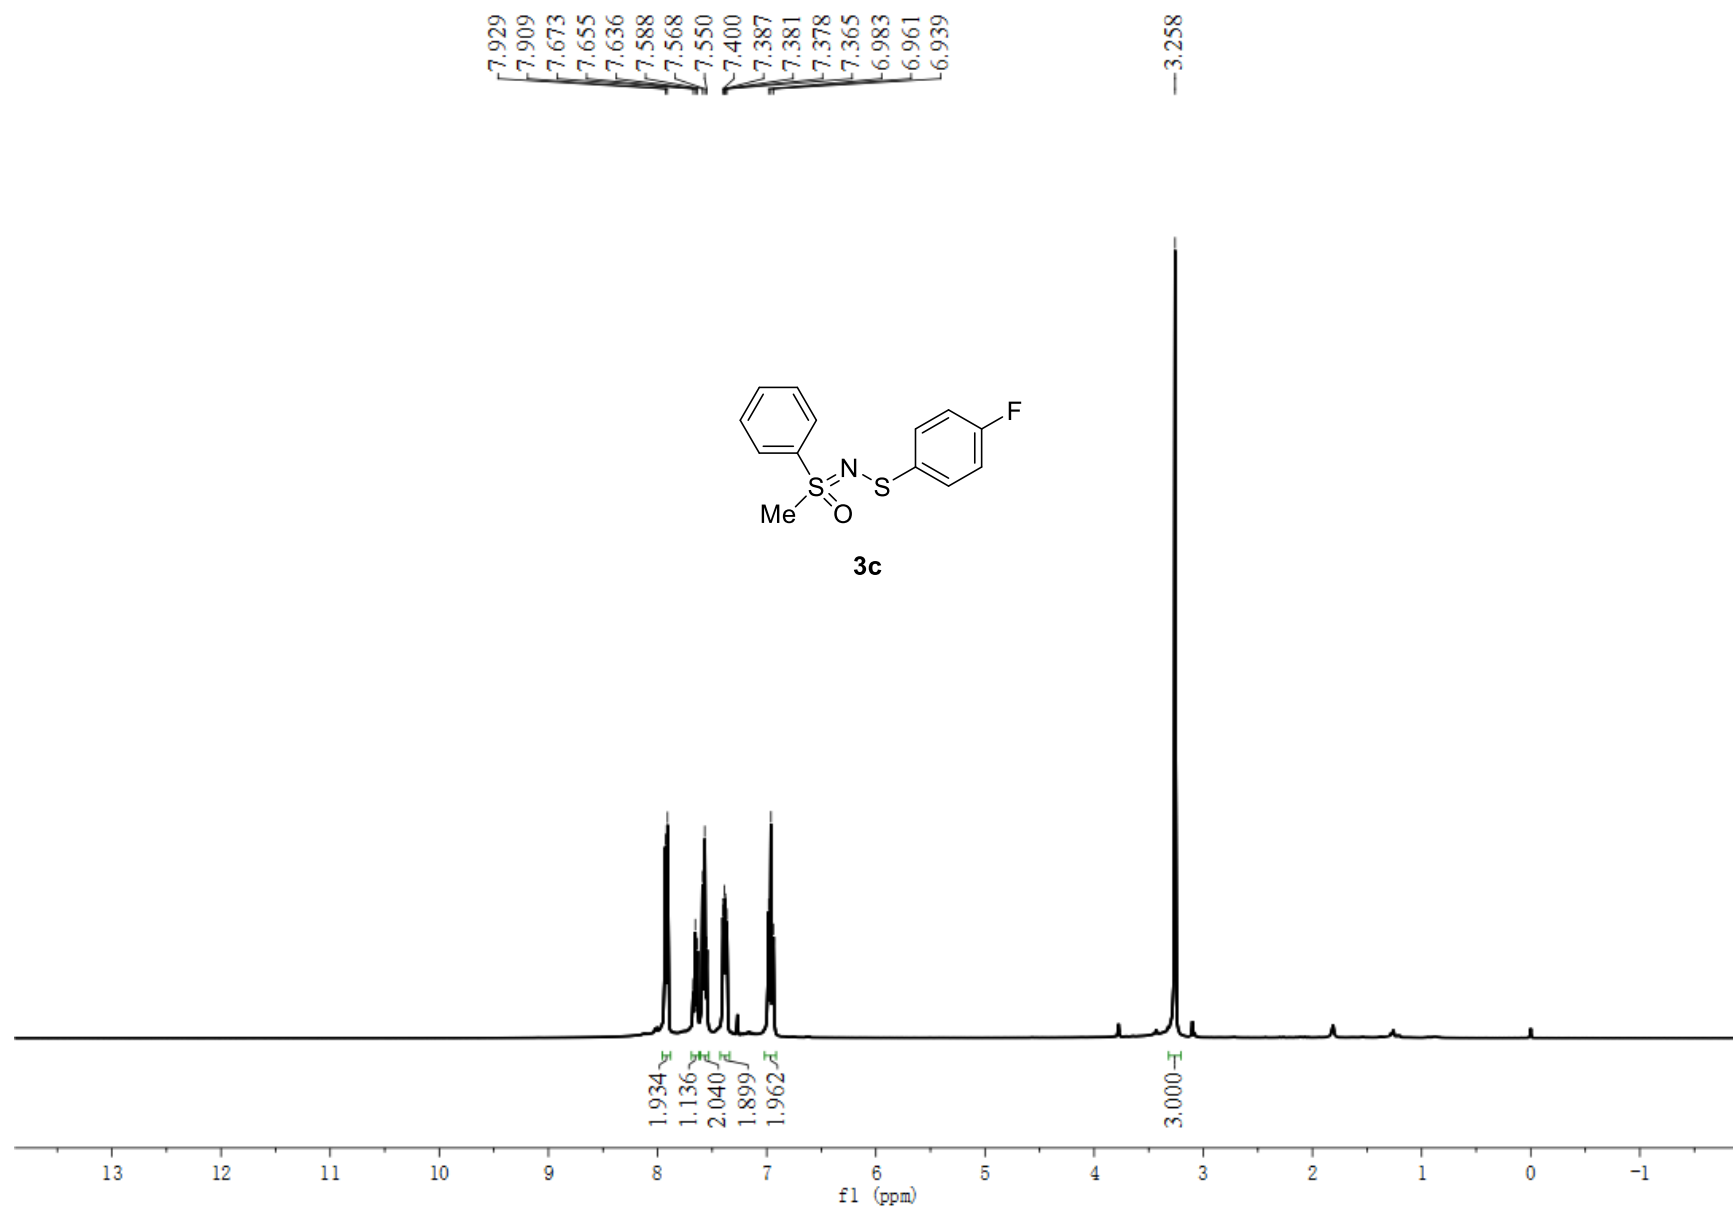

$^{13}\text{C}$  NMR spectra of compound **3c** (101 MHz,  $\text{CDCl}_3$ )

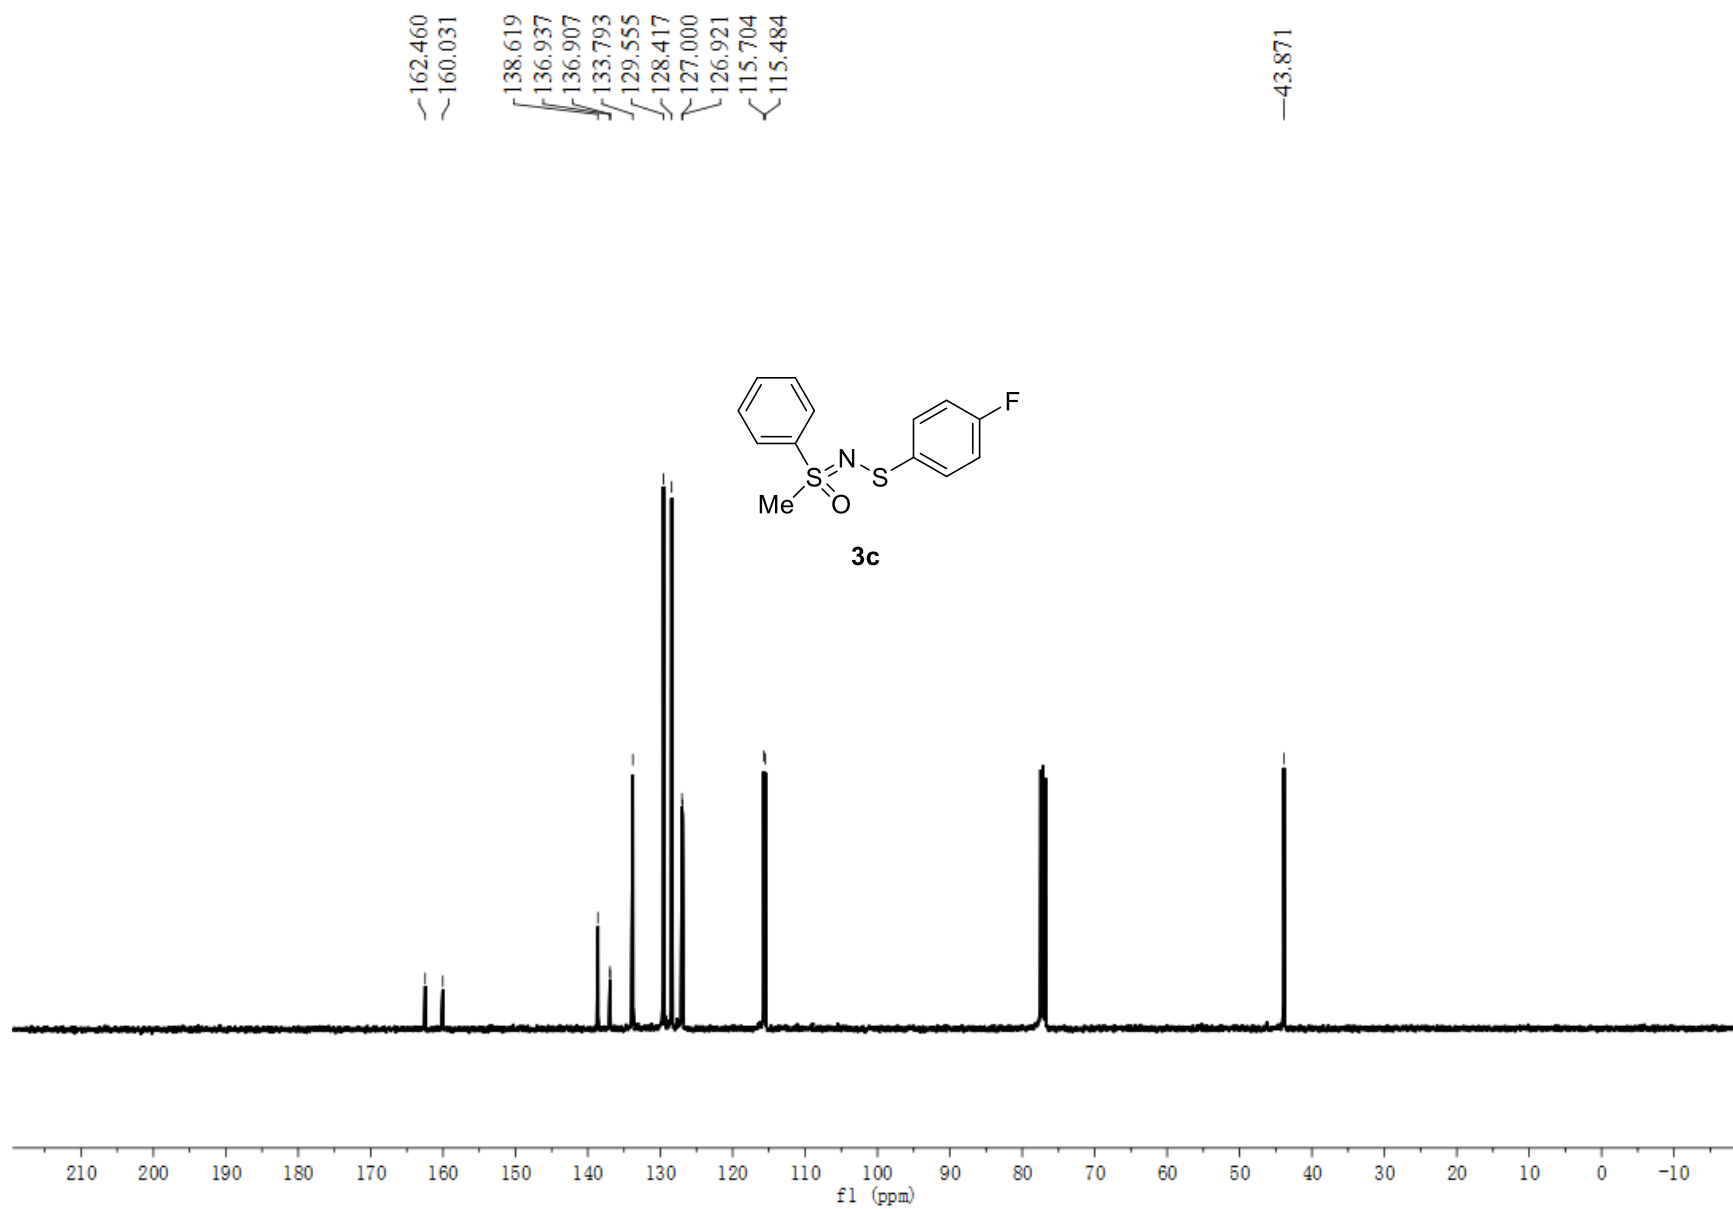

$^{19}\text{F}$  NMR spectra of compound **3c** (376 MHz,  $\text{CDCl}_3$ )

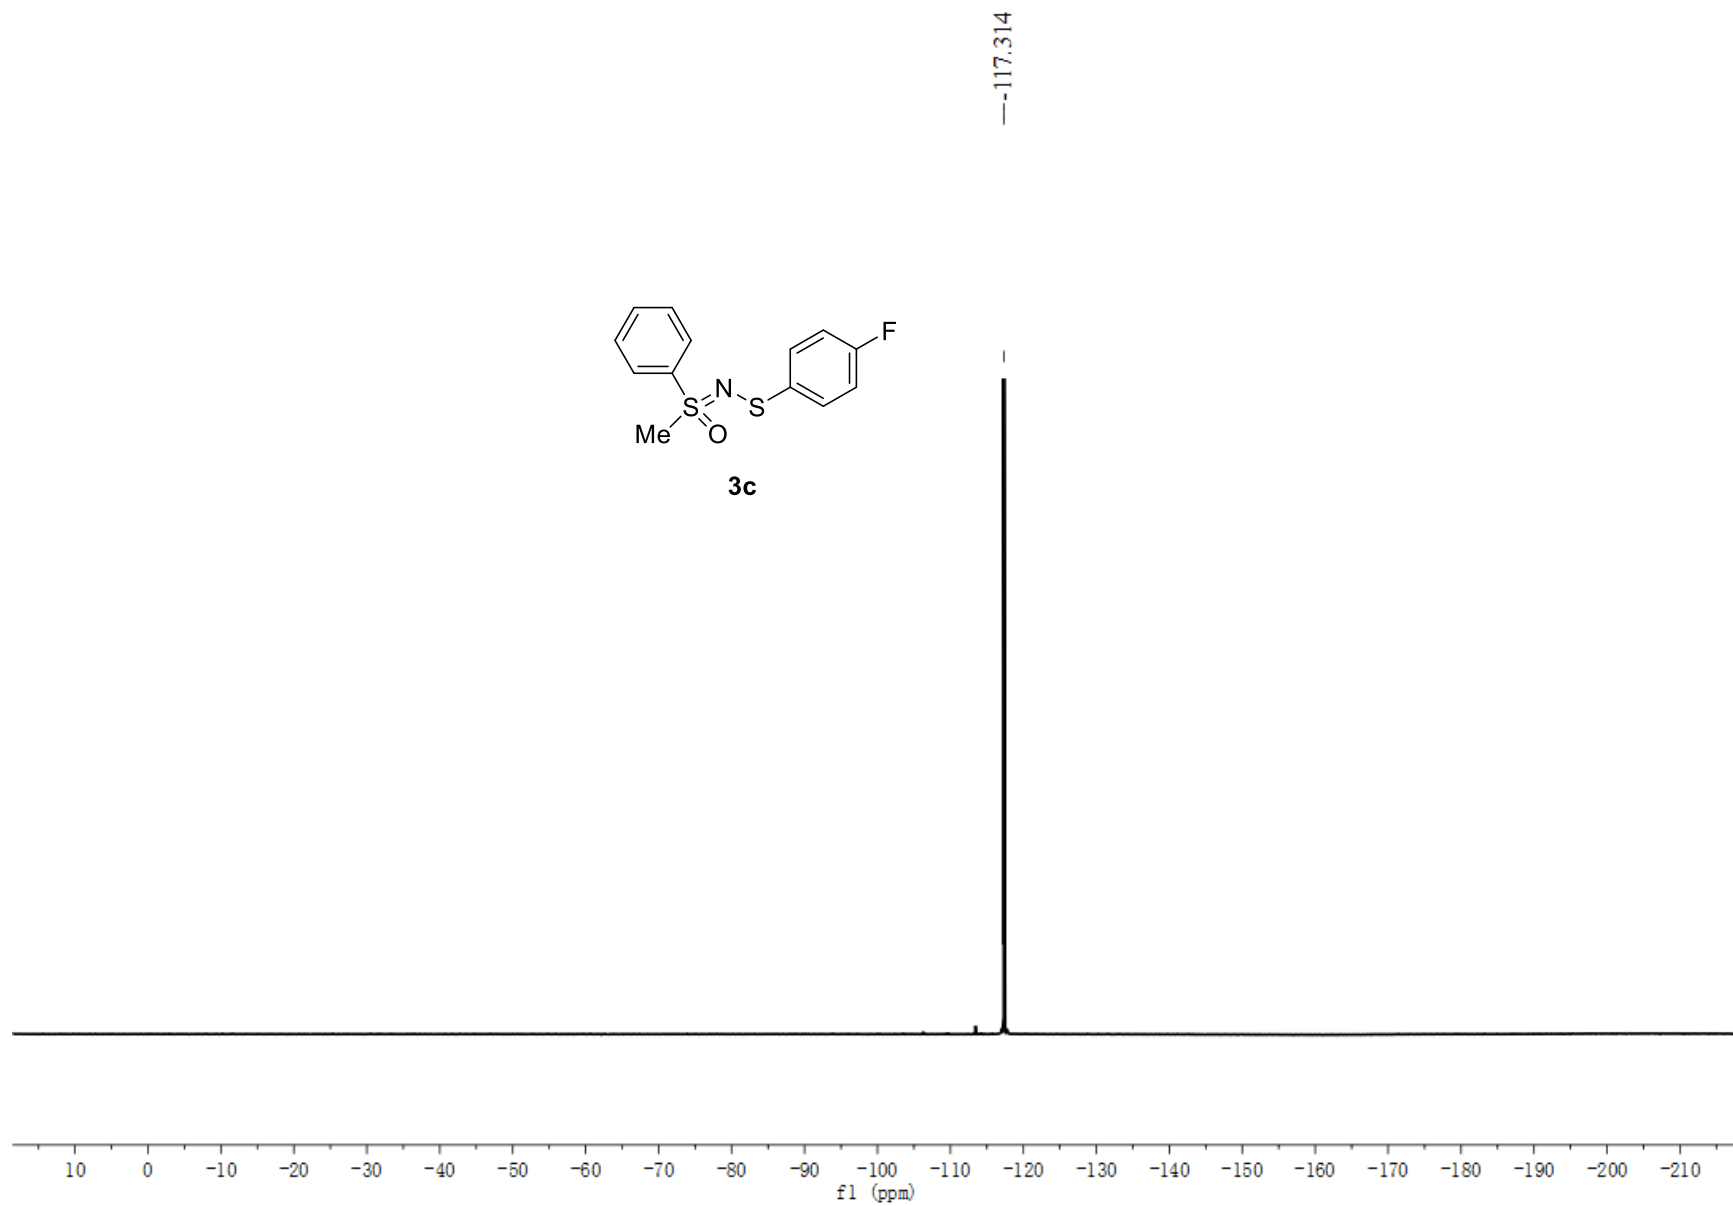

<sup>1</sup>H NMR spectra of compound **3d** (400 MHz, CDCl<sub>3</sub>)

7.932  
7.913  
7.677  
7.659  
7.641  
7.592  
7.573  
7.555  
7.324  
7.303  
7.221  
7.200  
—3.271

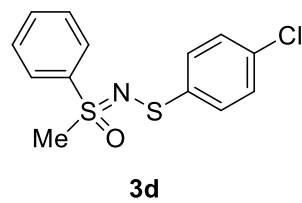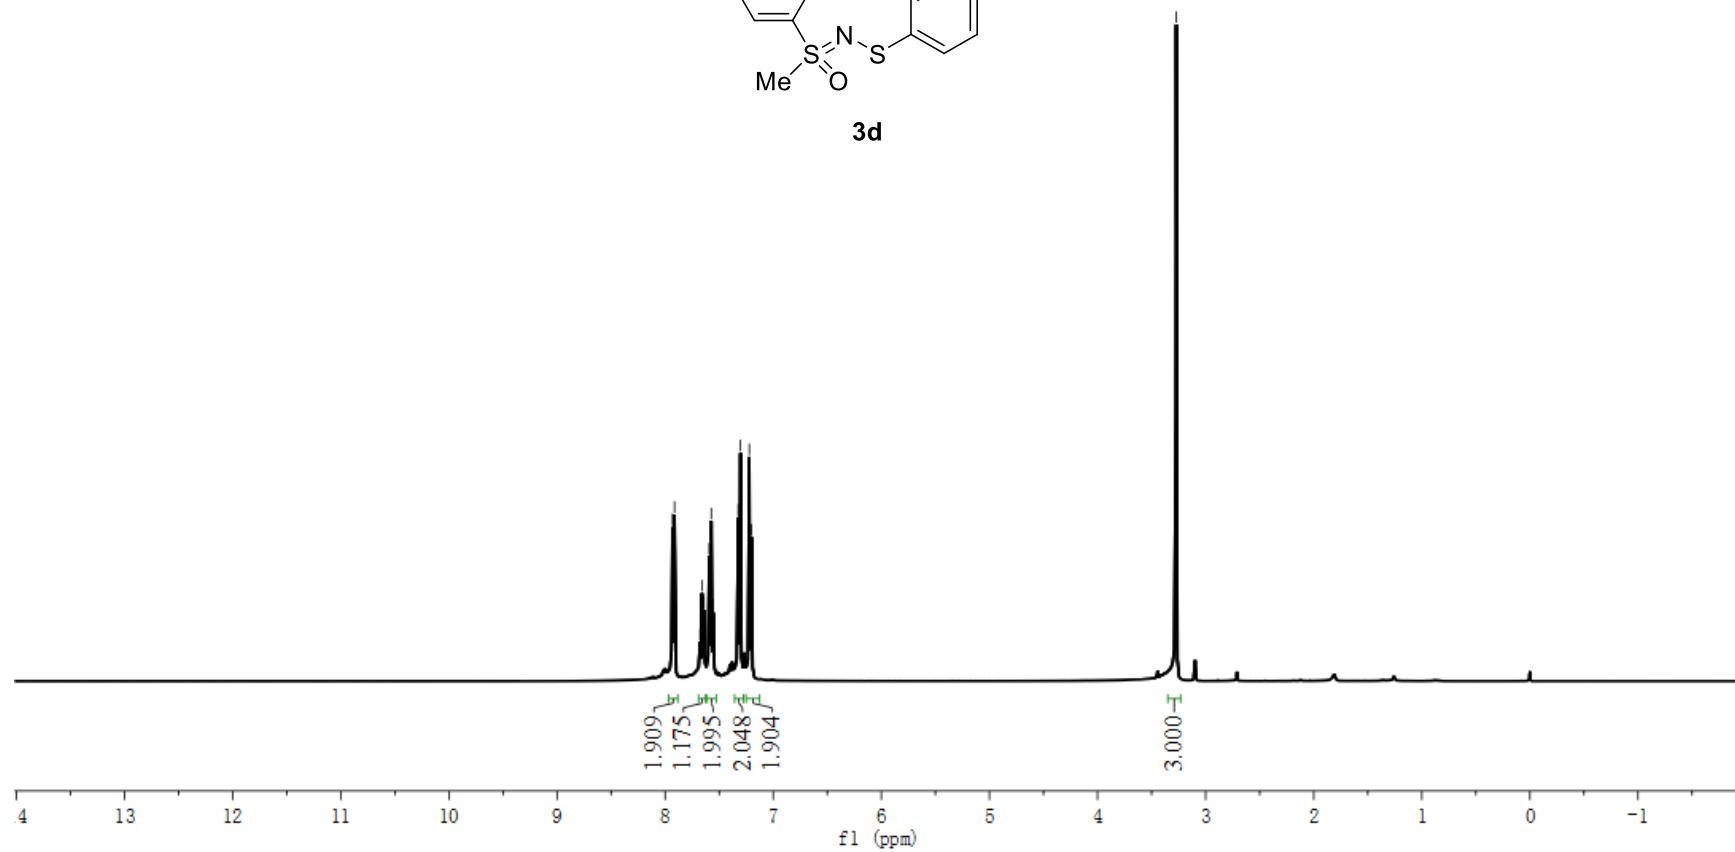

$^{13}\text{C}$  NMR spectra of compound **3d** (400 MHz,  $\text{CDCl}_3$ )

140.948  
138.448  
133.853  
130.579  
129.576  
128.536  
128.352  
125.075

—43.839

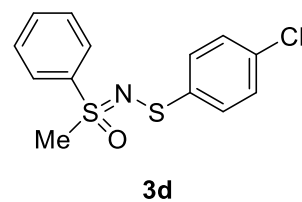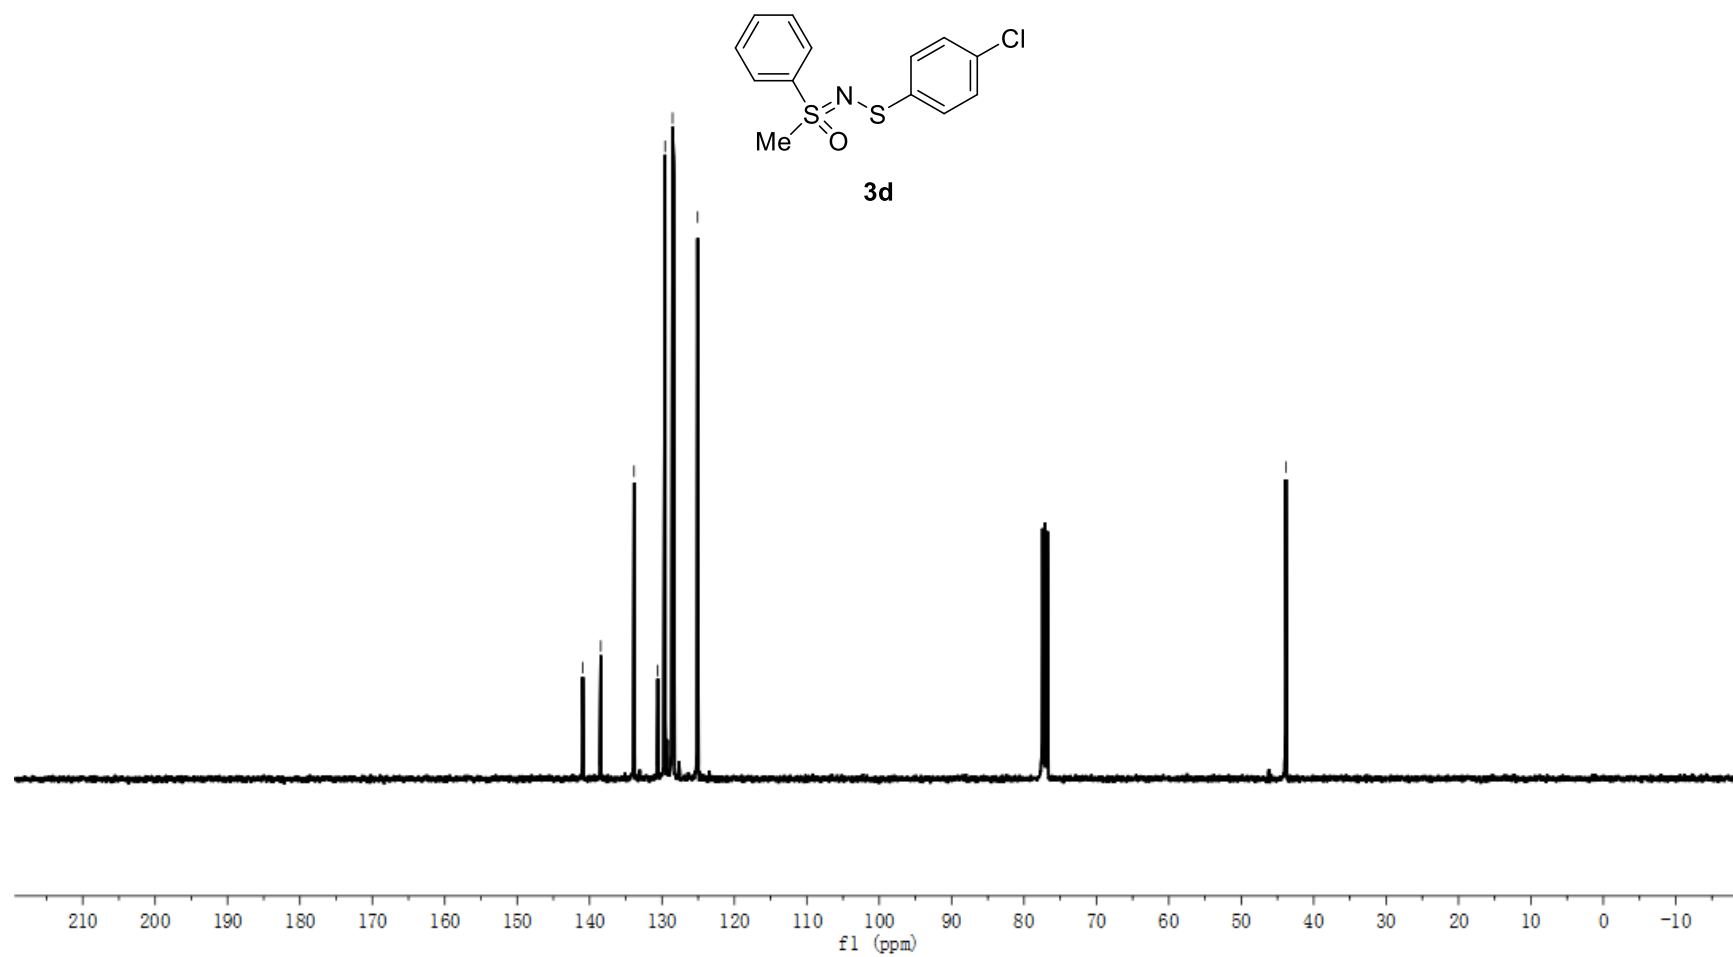

<sup>1</sup>H NMR spectra of compound **3e** (400 MHz, CDCl<sub>3</sub>)

7.931  
7.913  
7.680  
7.661  
7.643  
7.595  
7.575  
7.557  
7.365  
7.344  
7.260  
7.239  
— 3.273

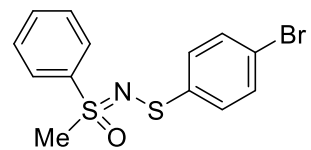

**3e**

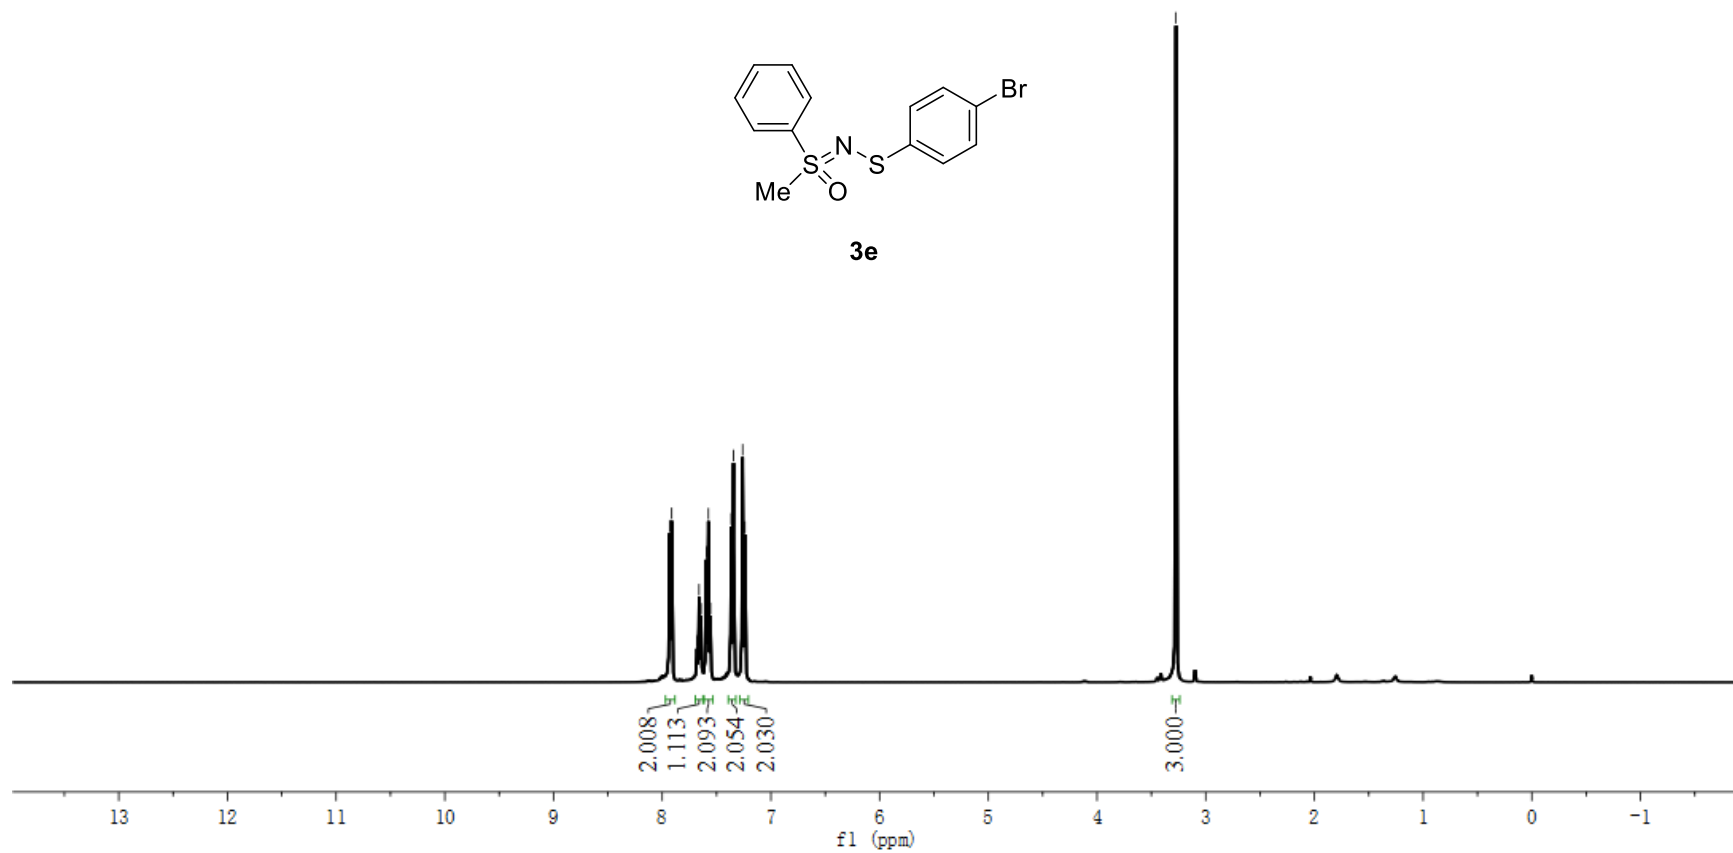

$^{13}\text{C}$  NMR spectra of compound **3e** (101 MHz,  $\text{CDCl}_3$ )

141.746  
138.460  
133.907  
131.440  
129.625  
128.387  
125.268  
118.363

—43.881

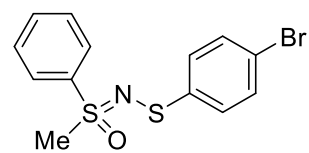

**3e**

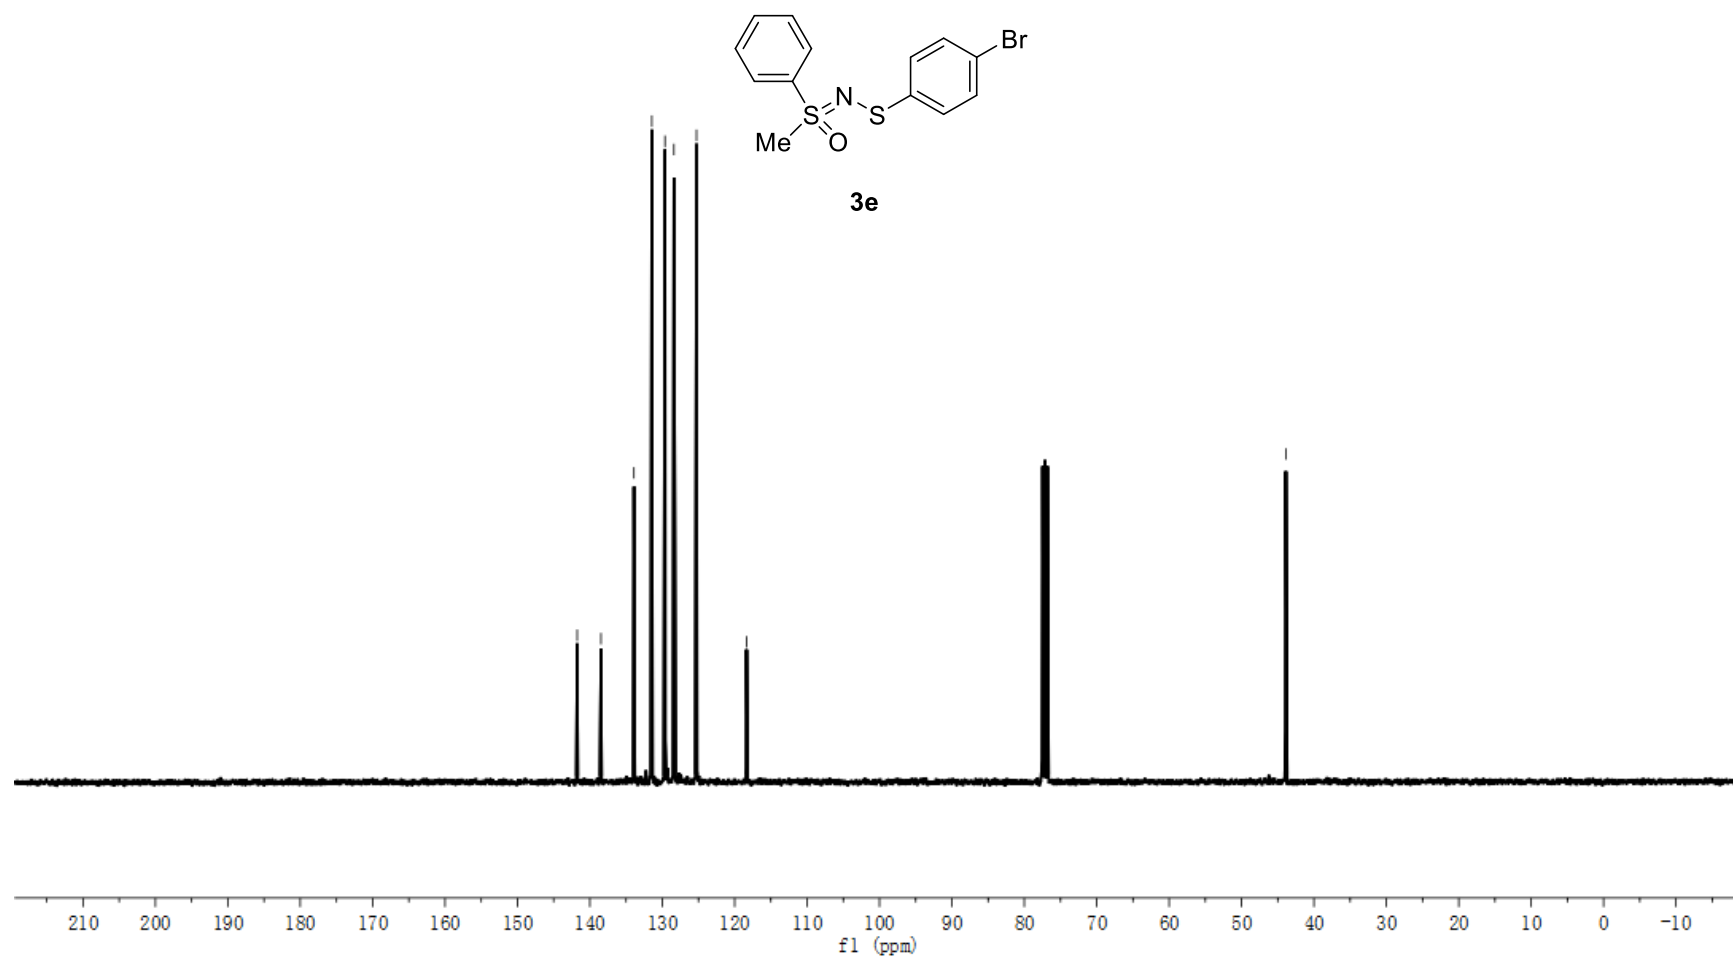

<sup>1</sup>H NMR spectra of compound **3f** (400 MHz, CDCl<sub>3</sub>)

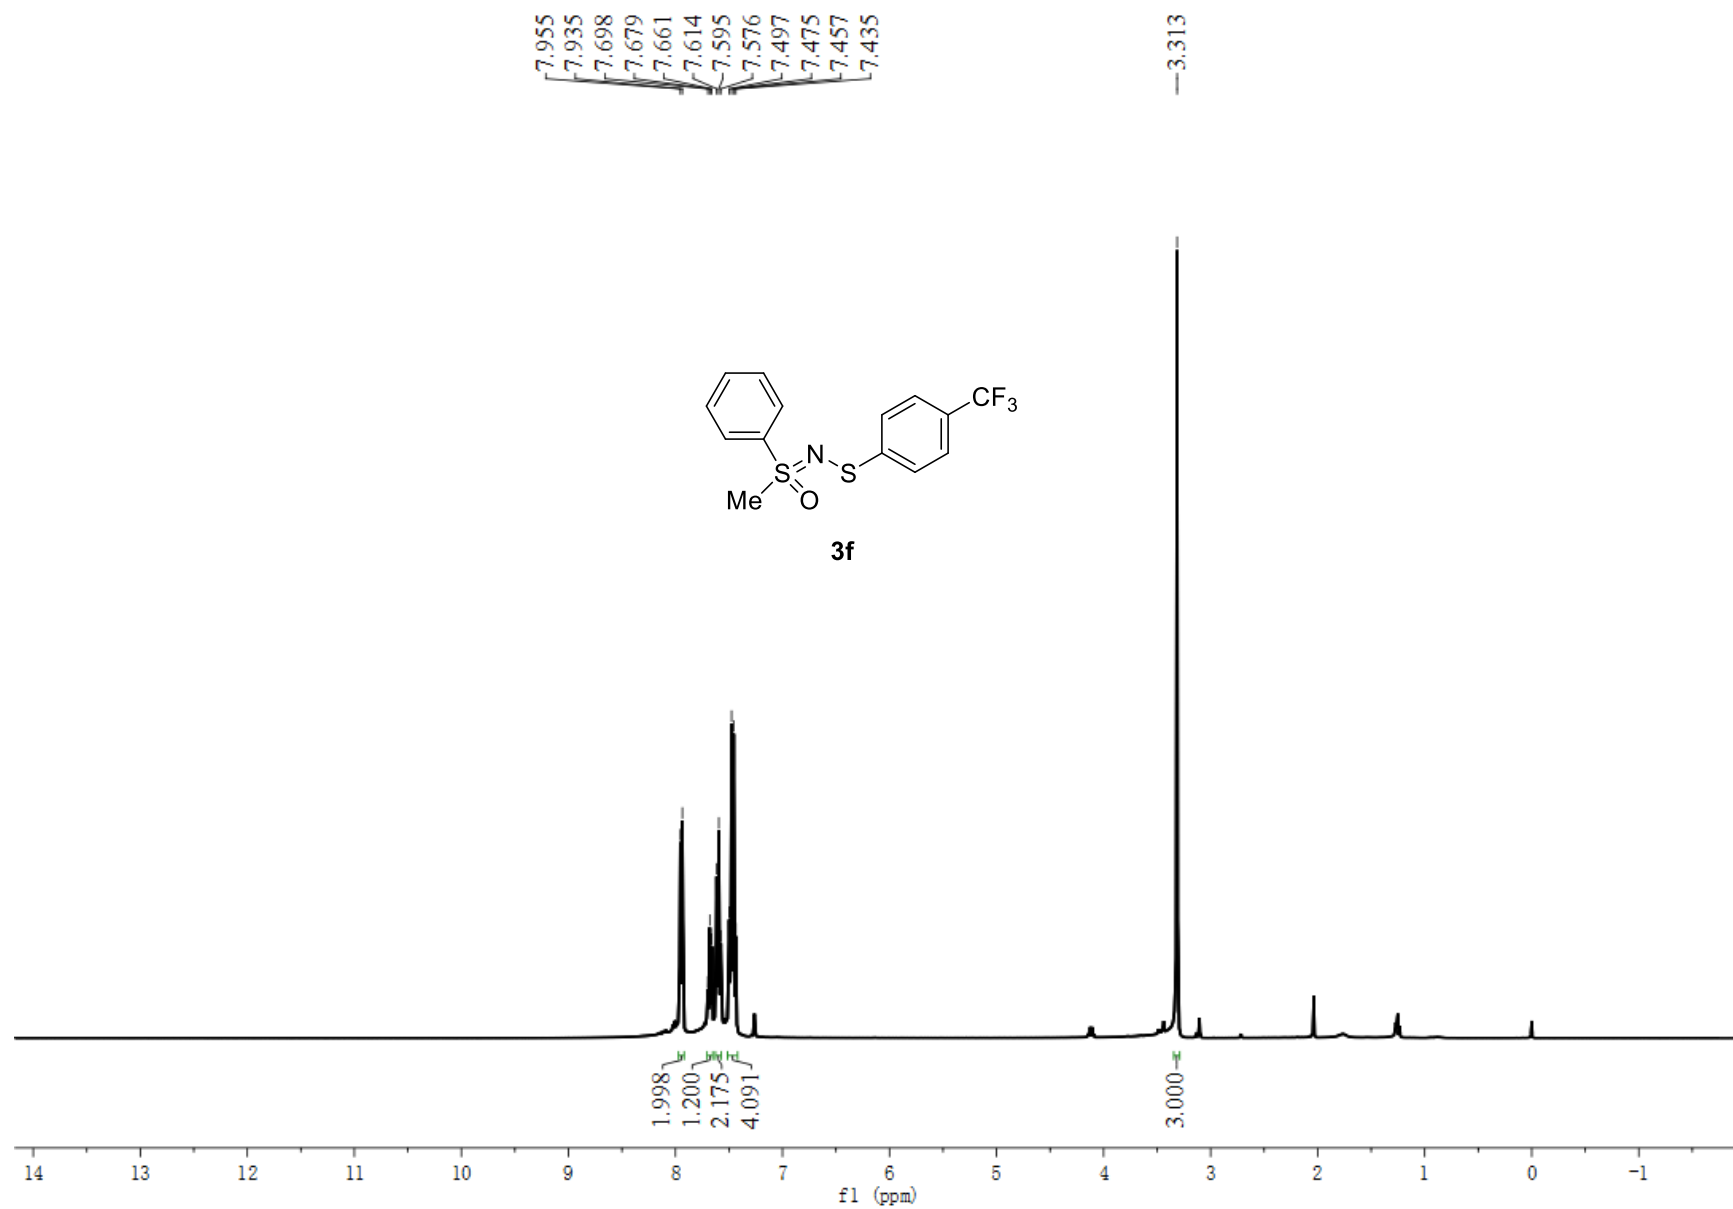

$^{13}\text{C}$  NMR spectra of compound **3f** (101 MHz,  $\text{CDCl}_3$ )

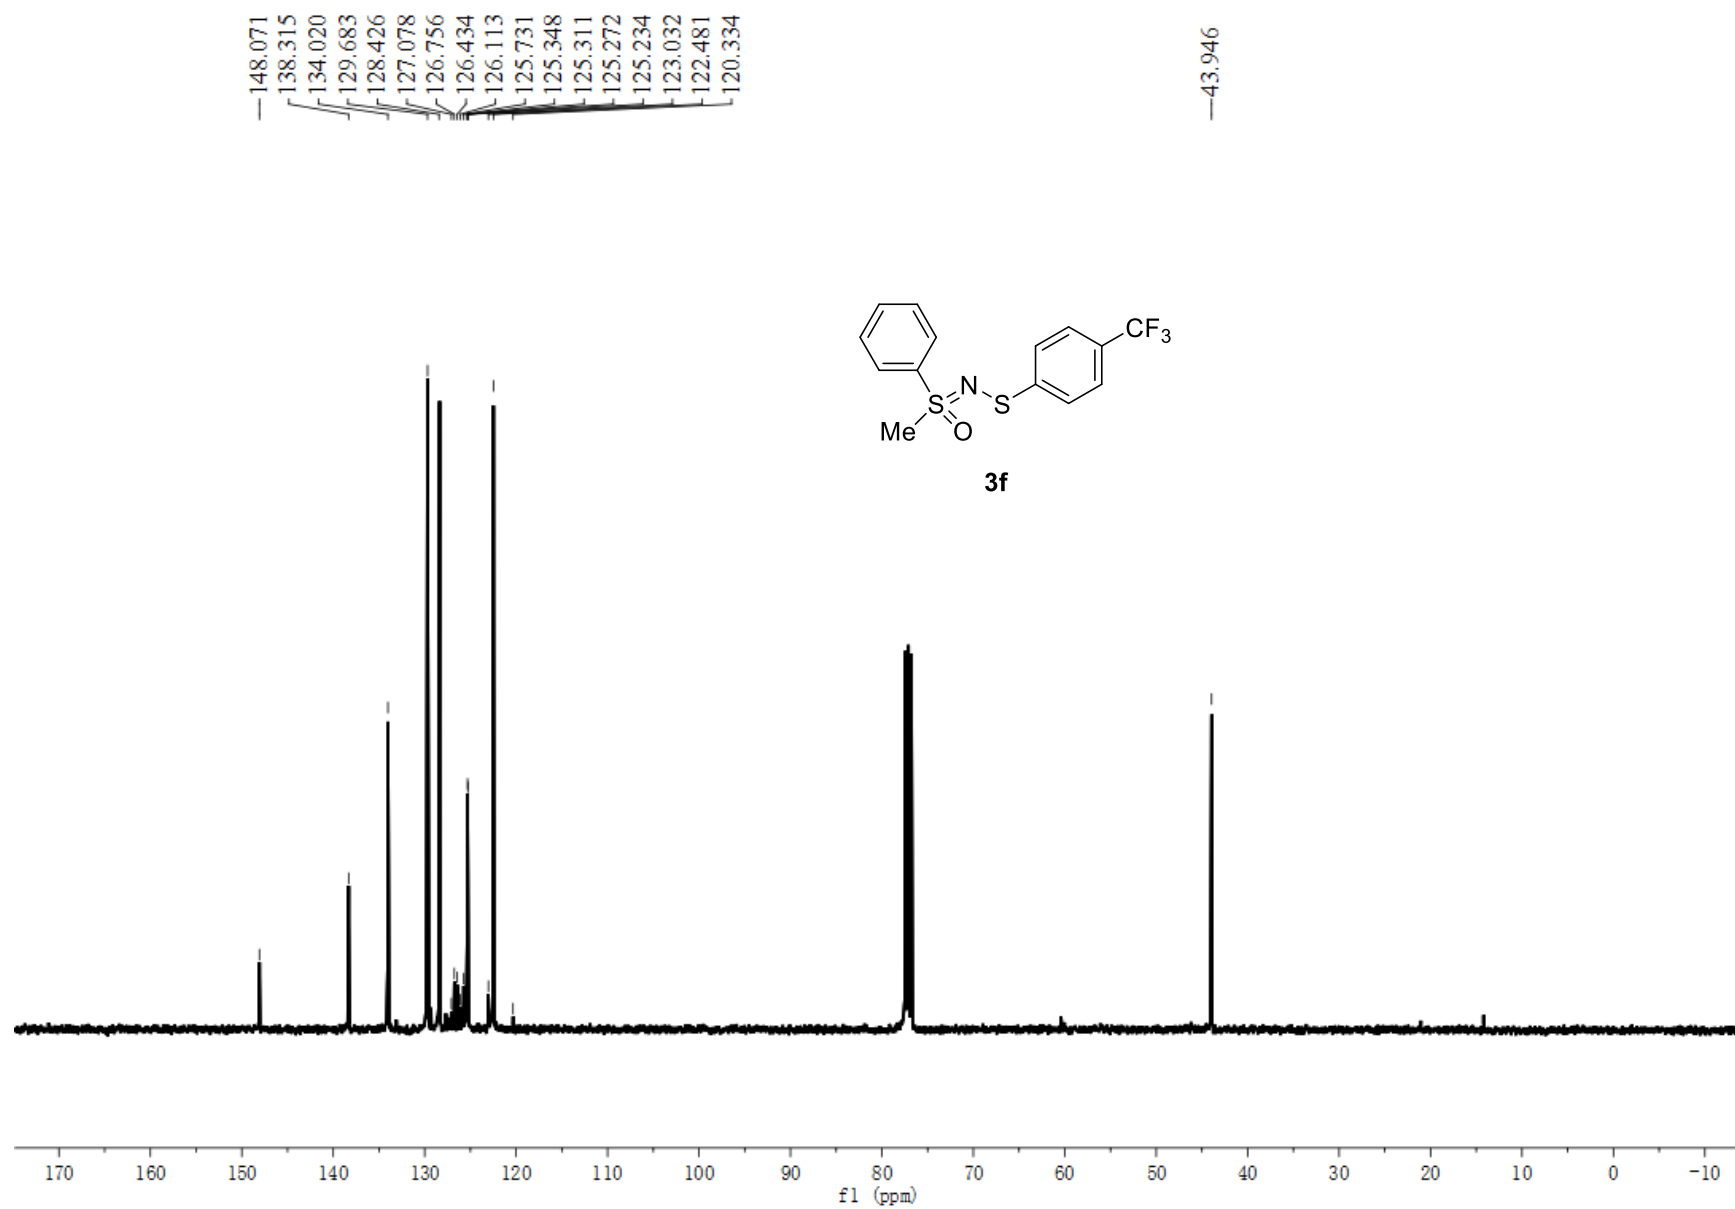

$^{19}\text{F}$  NMR spectra of compound **3f** (376 MHz,  $\text{CDCl}_3$ )

— -62.099

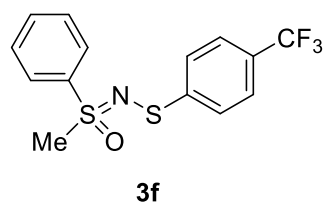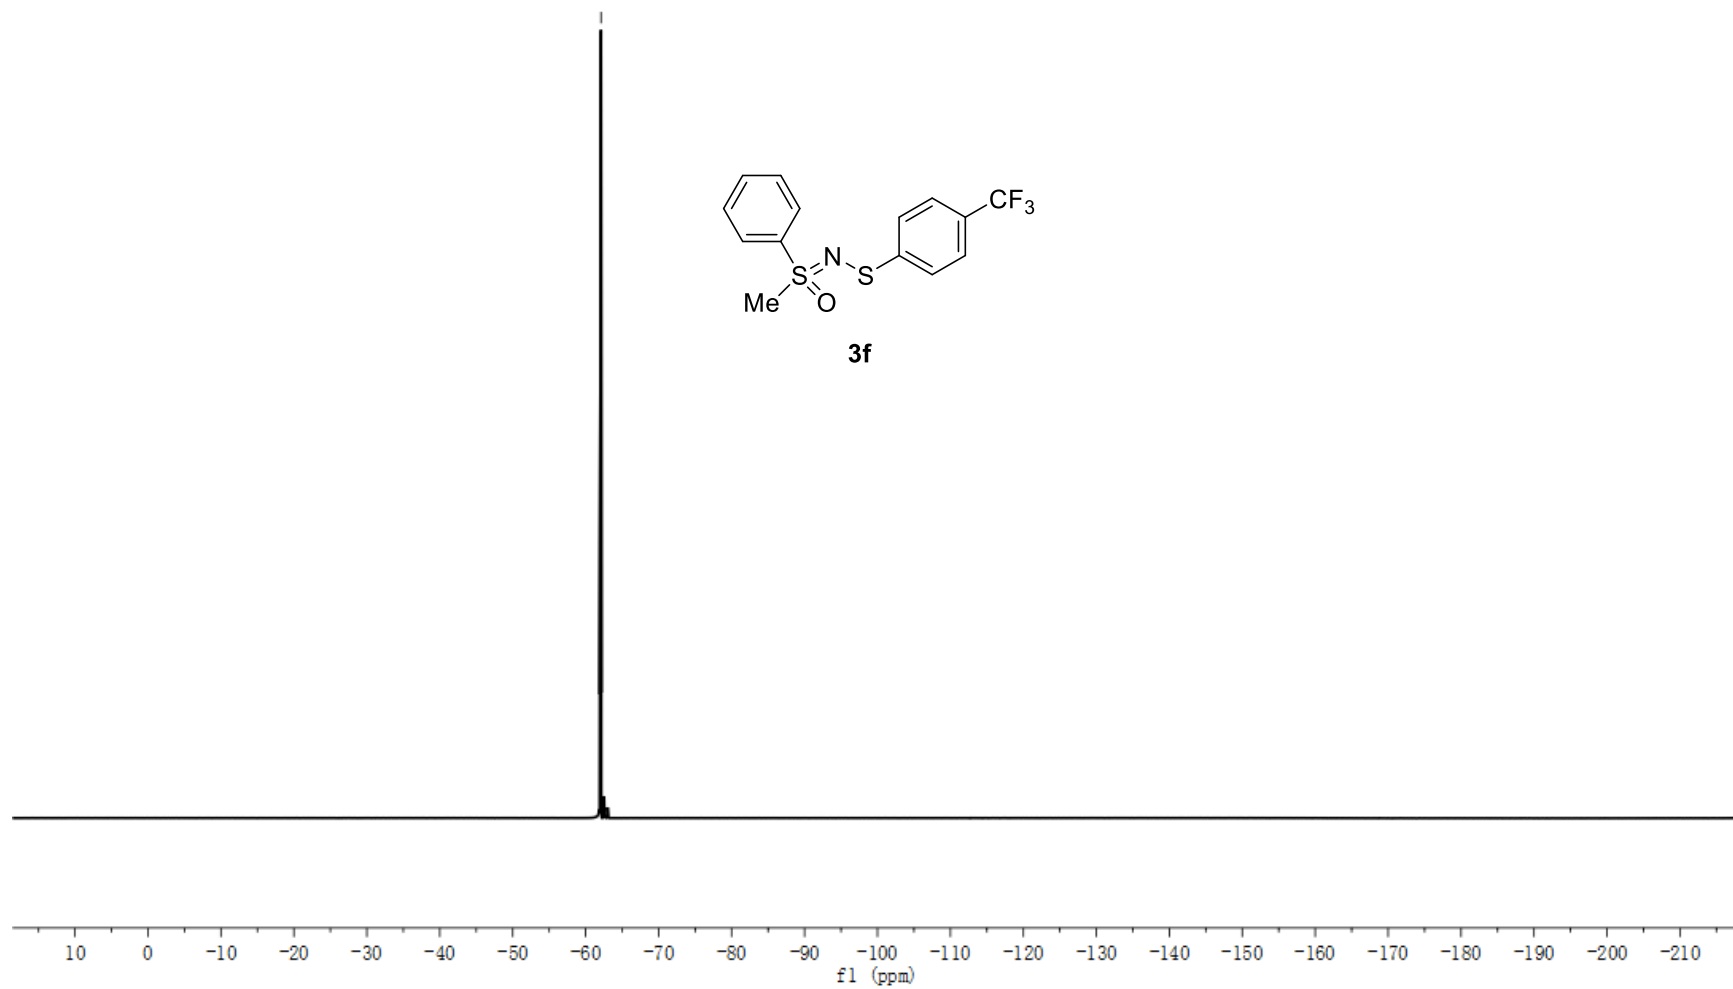

<sup>1</sup>H NMR spectra of compound **3g** (400 MHz, CDCl<sub>3</sub>)

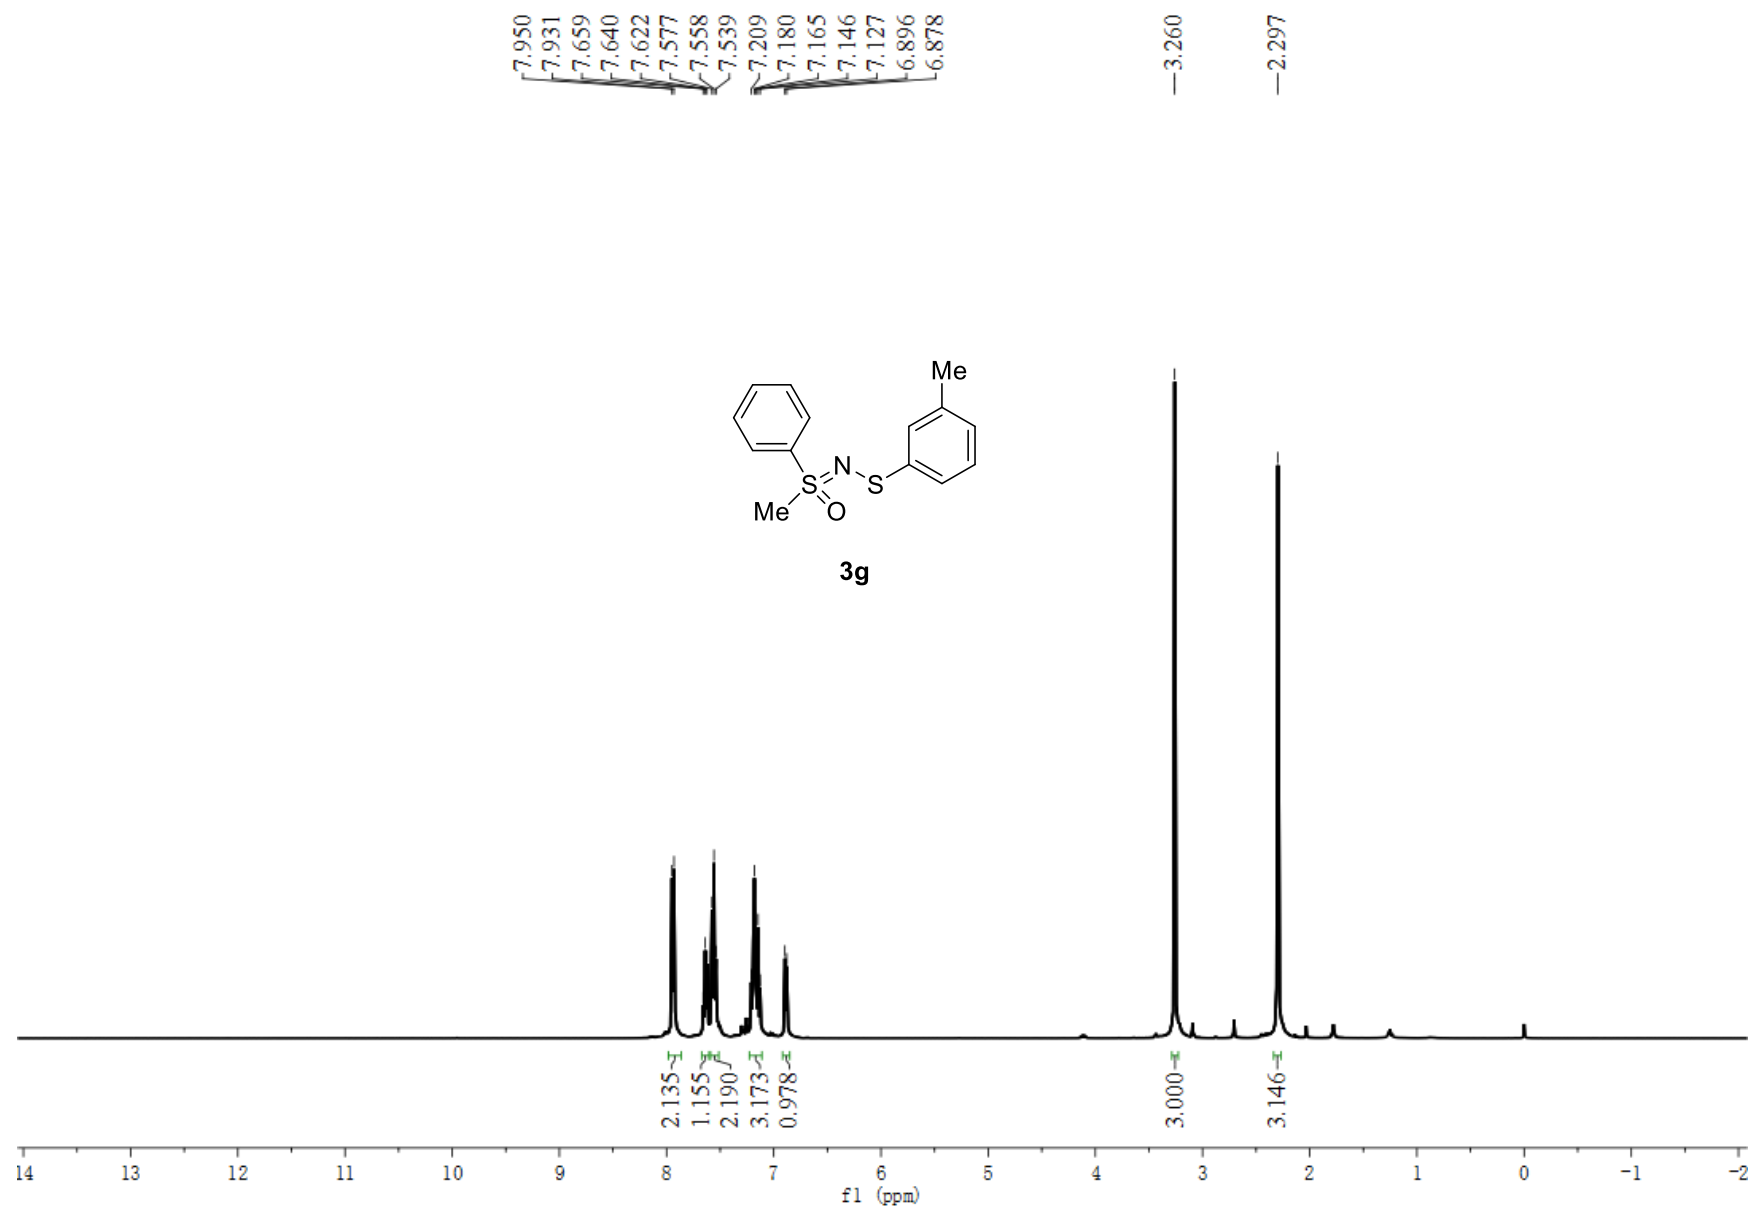

$^{13}\text{C}$  NMR spectra of compound **3g** (101 MHz,  $\text{CDCl}_3$ )

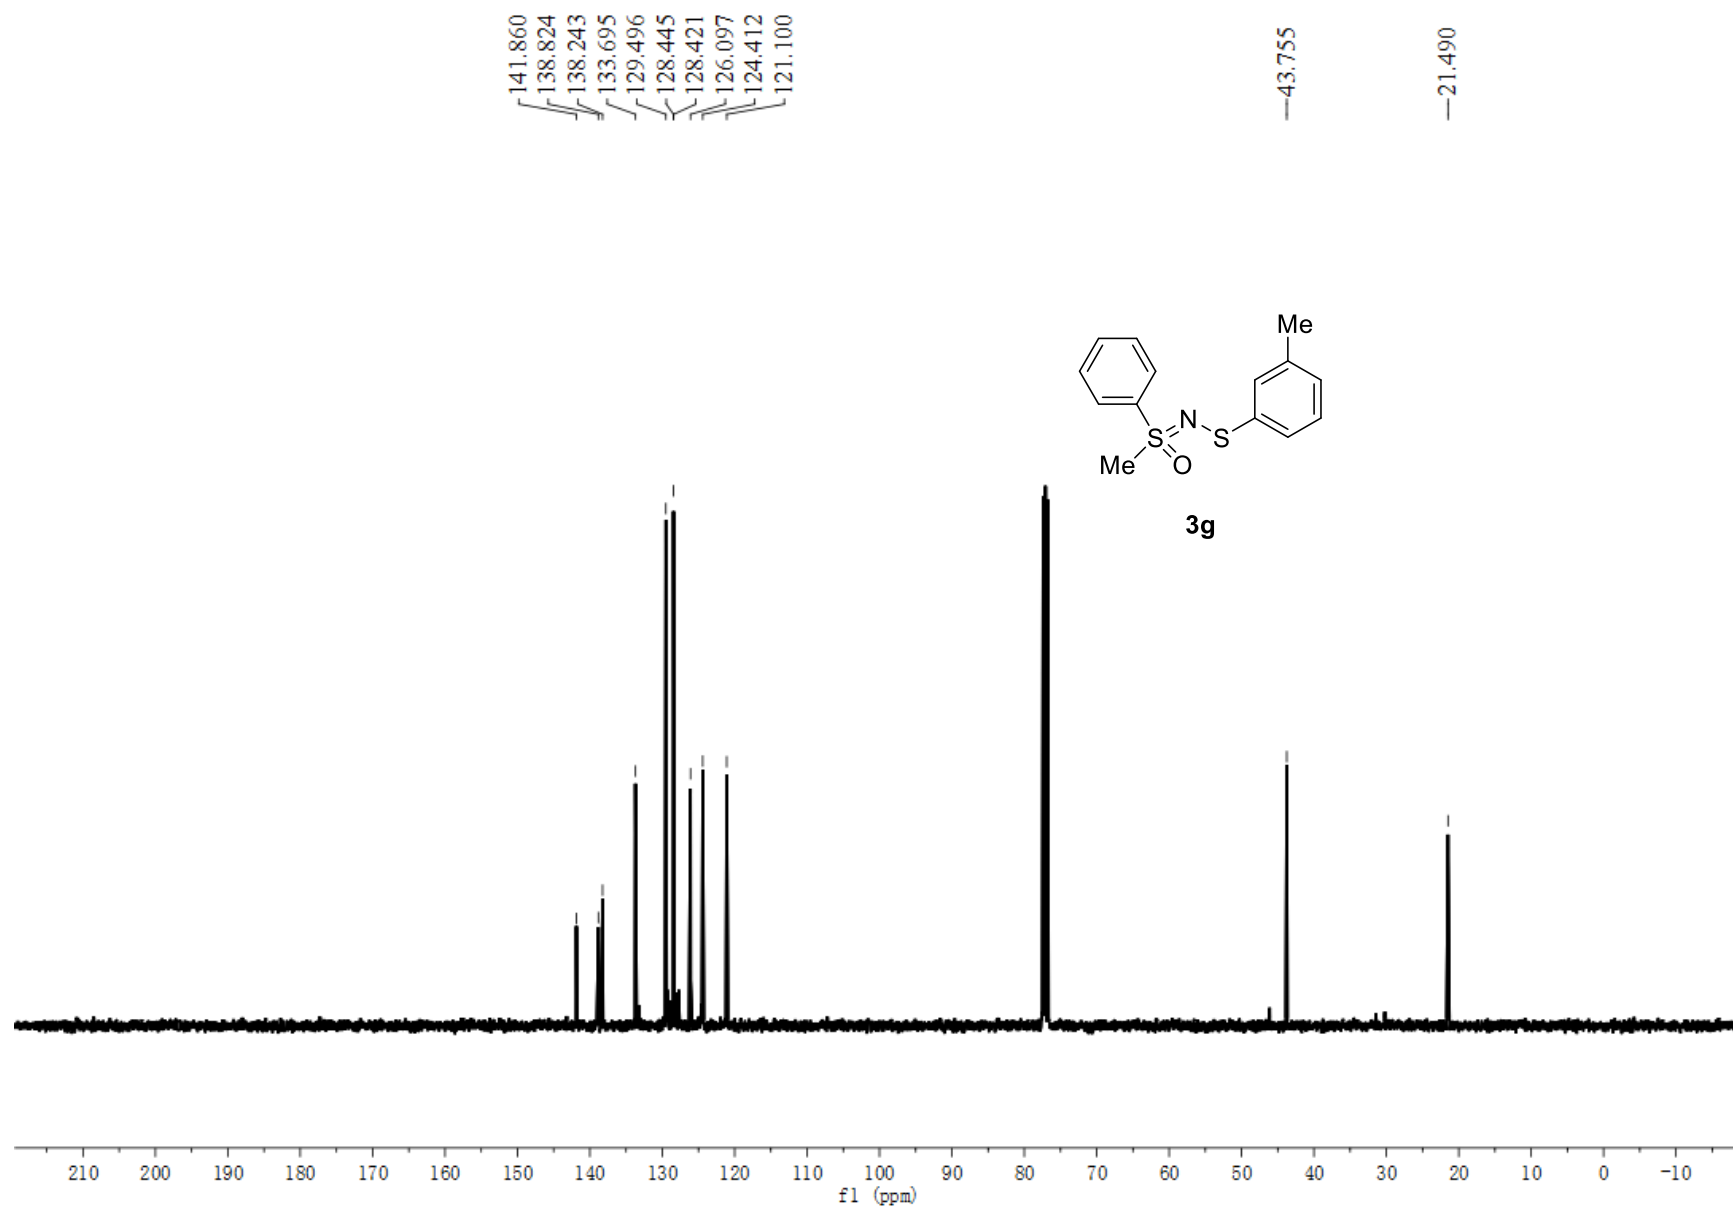

<sup>1</sup>H NMR spectra of compound **3h** (400 MHz, CDCl<sub>3</sub>)

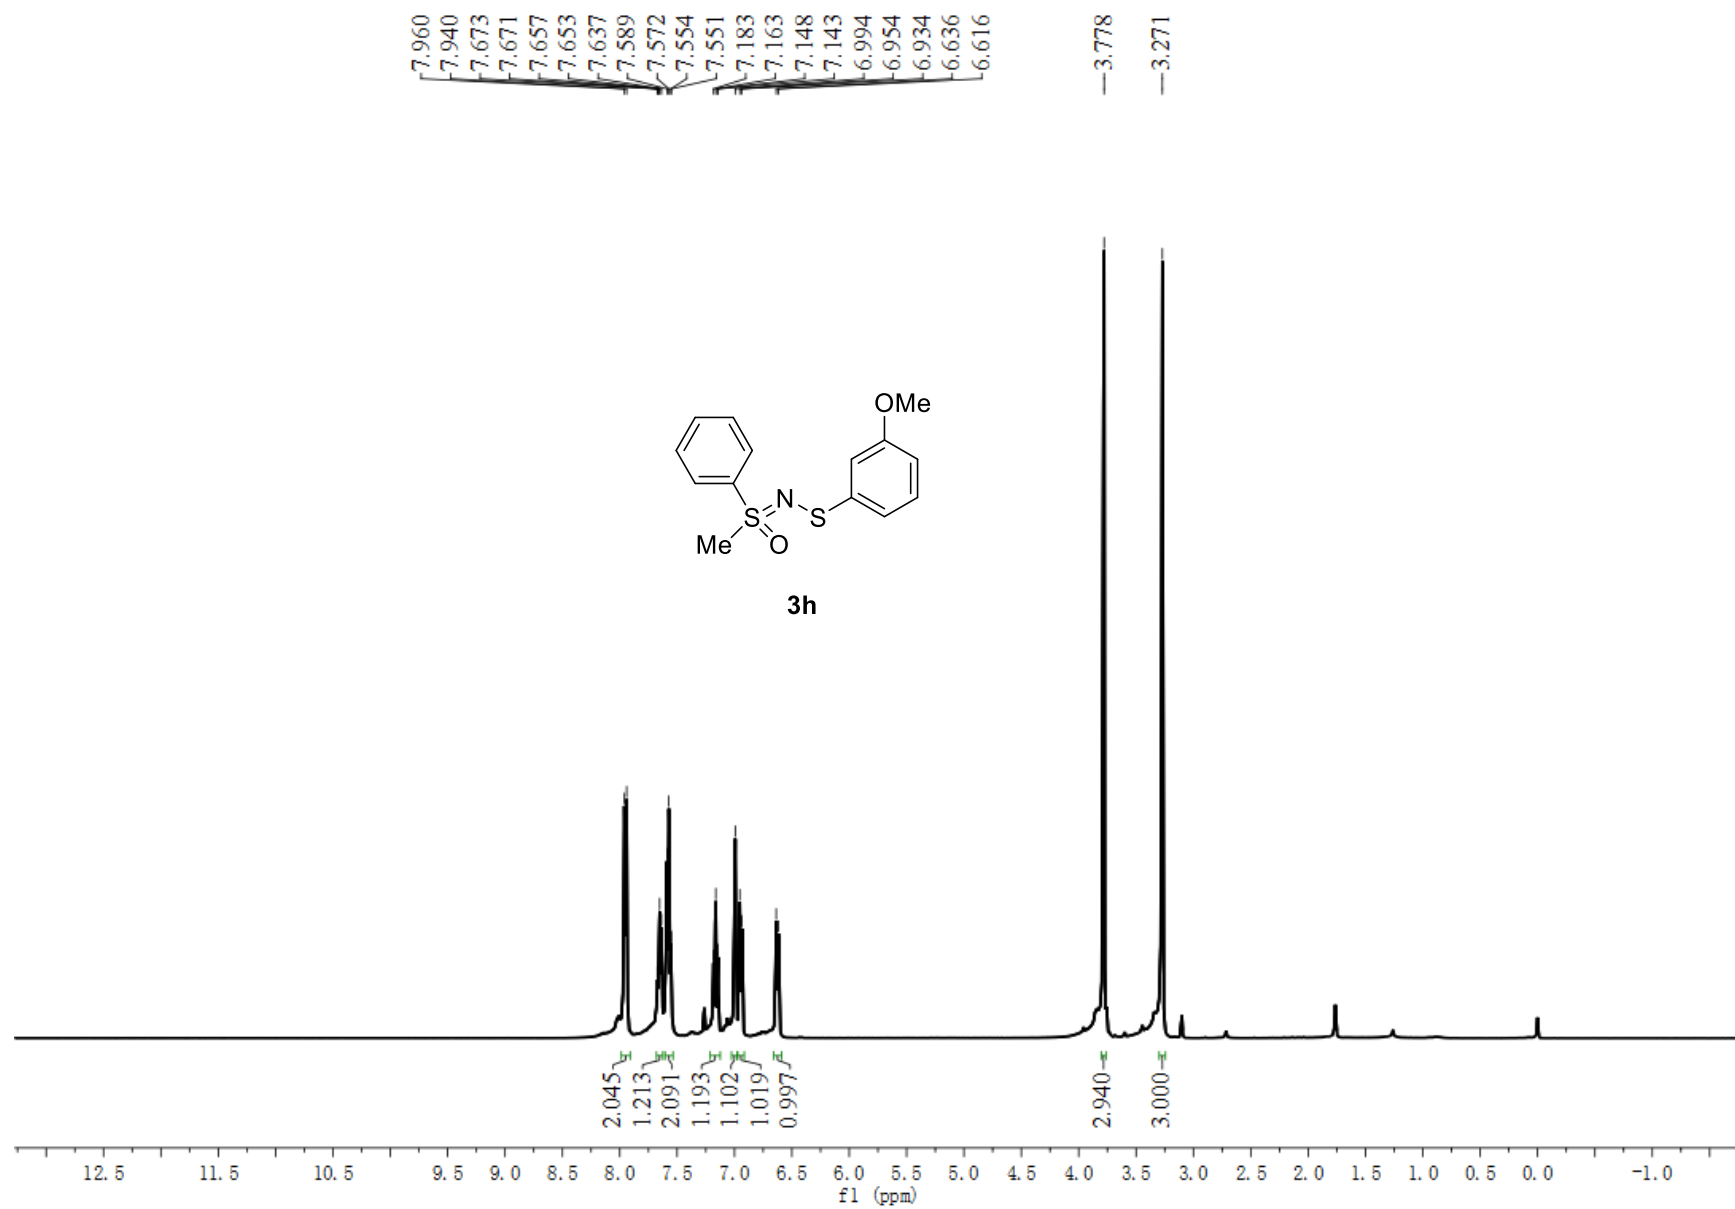

$^{13}\text{C}$  NMR spectra of compound **3h** (101 MHz,  $\text{CDCl}_3$ )

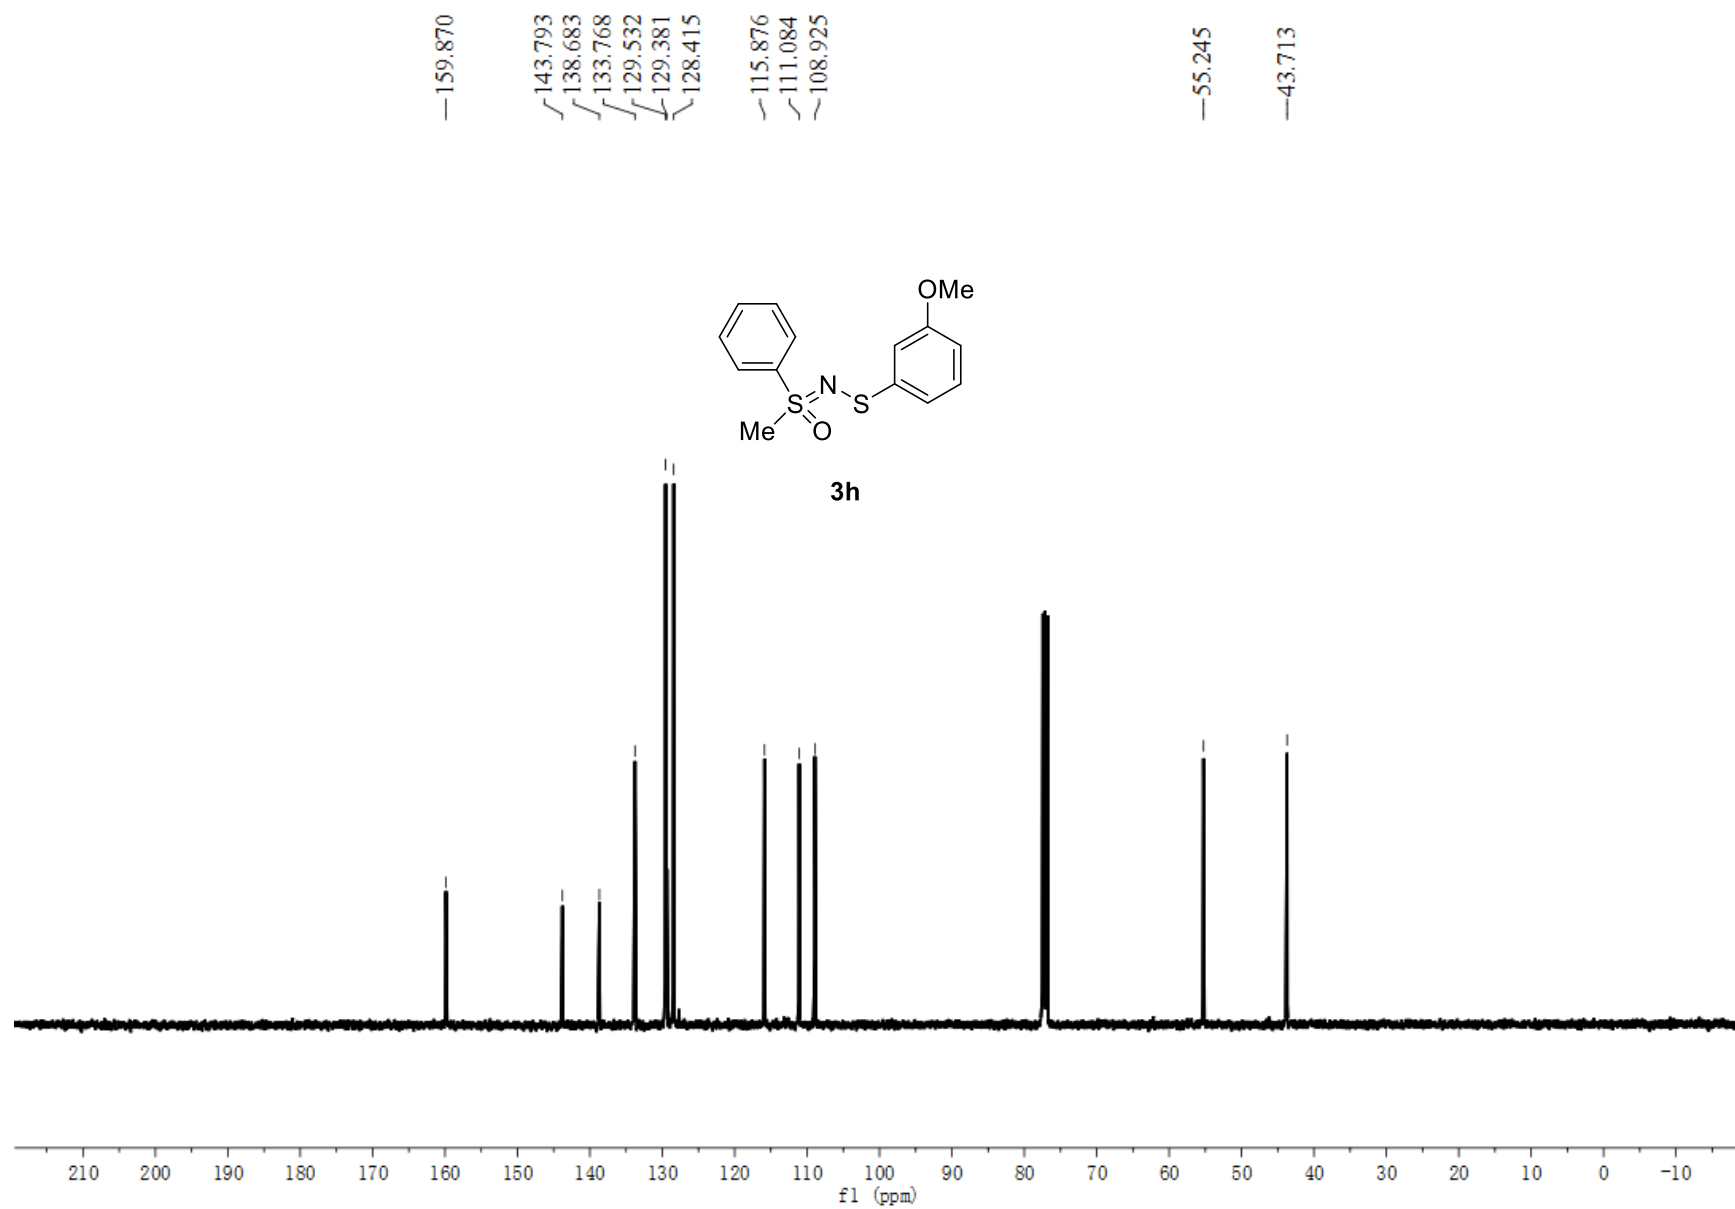

<sup>1</sup>H NMR spectra of compound **3i** (400 MHz, CDCl<sub>3</sub>)

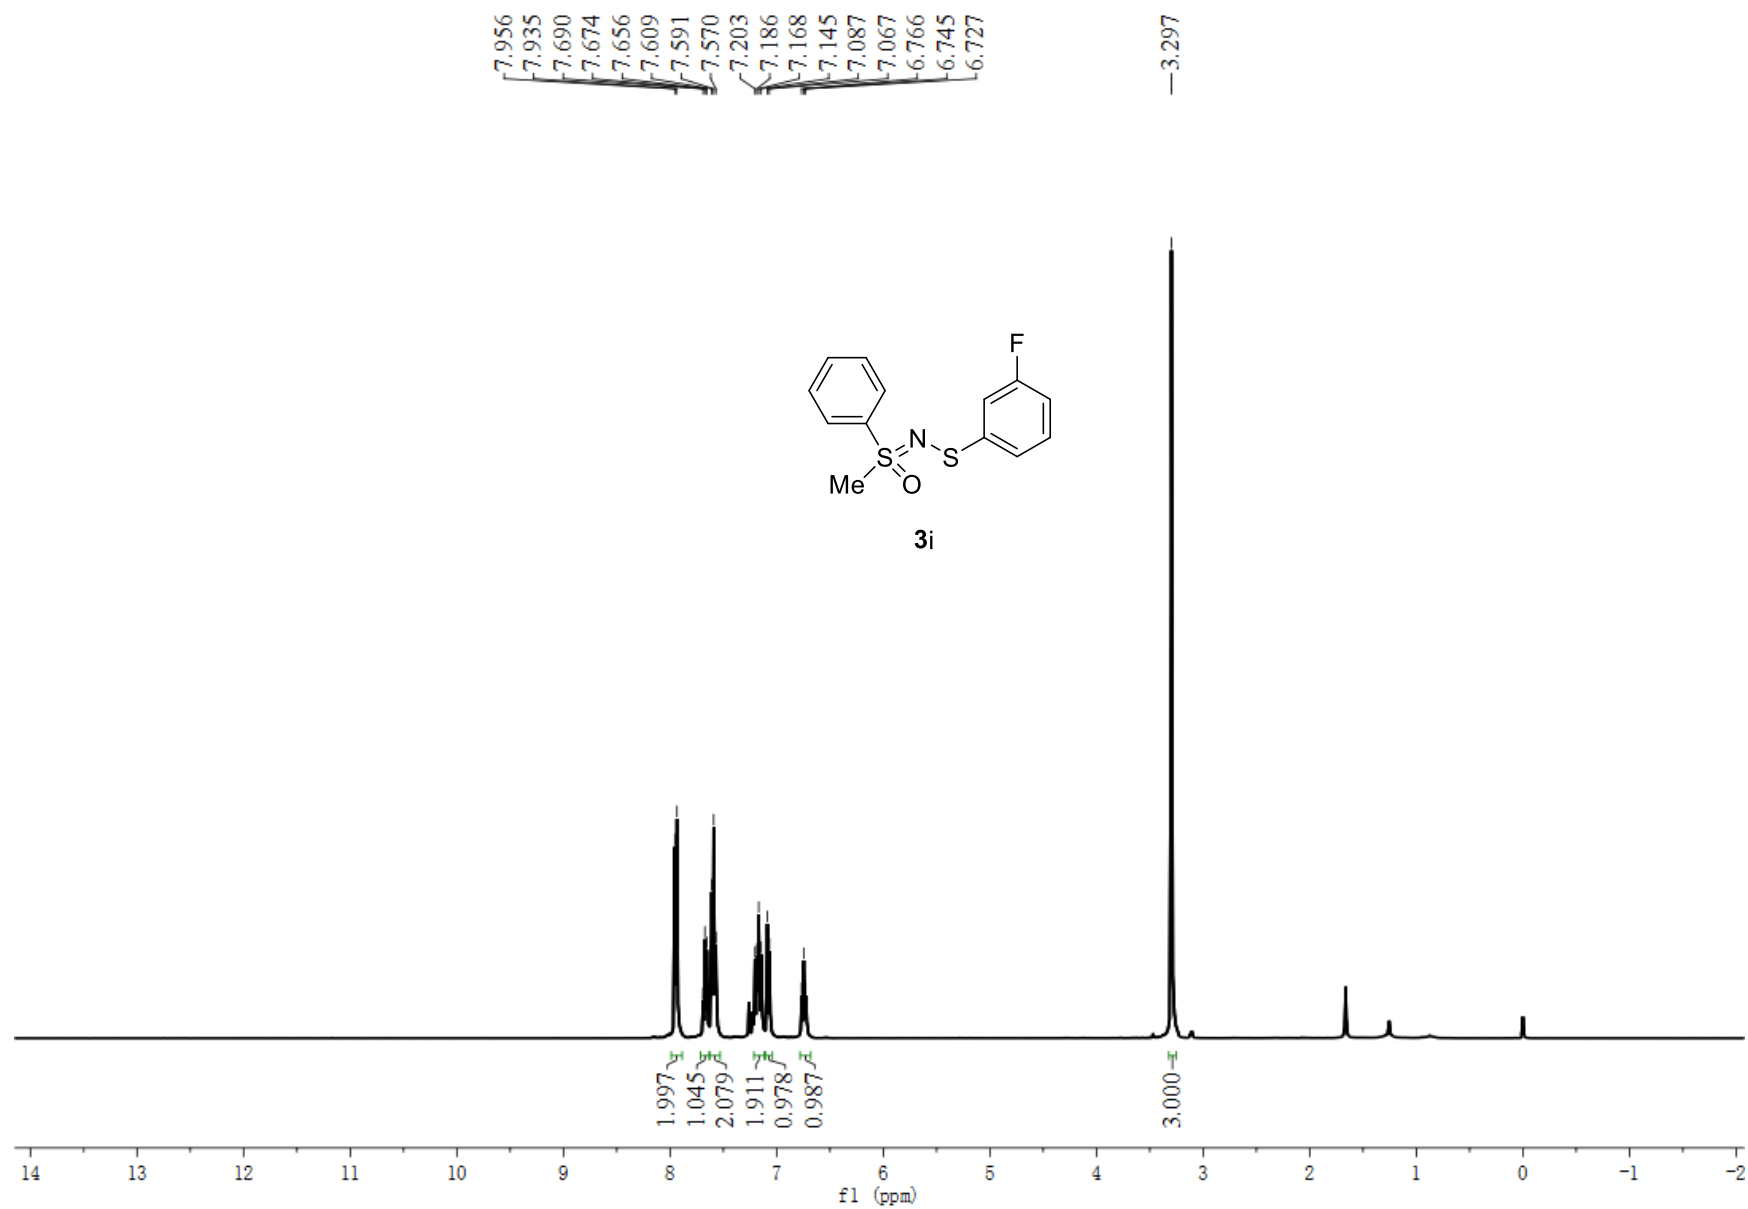

$^{13}\text{C}$  NMR spectra of compound **3i** (101 MHz,  $\text{CDCl}_3$ )

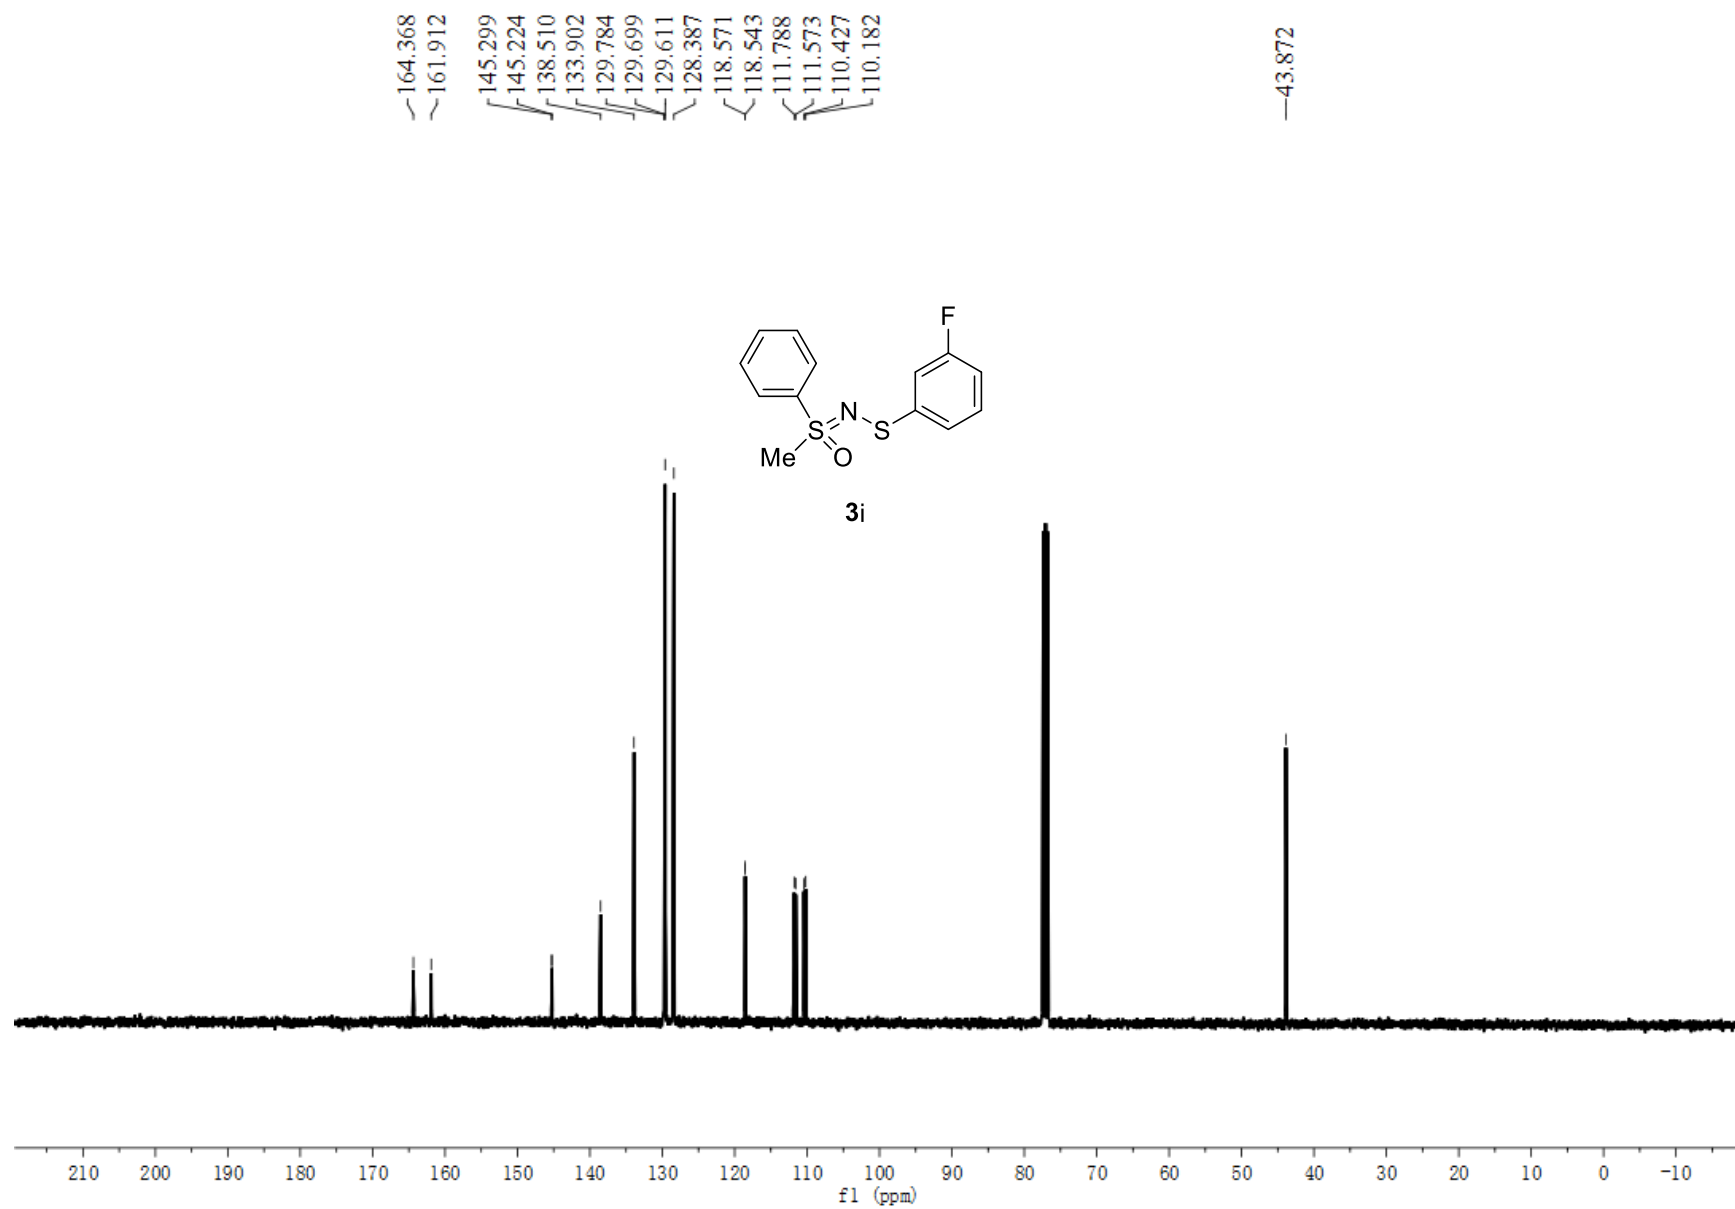

$^{19}\text{F}$  NMR spectra of compound **3i** (376 MHz,  $\text{CDCl}_3$ )

— -112.656

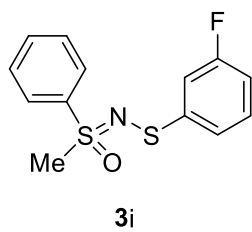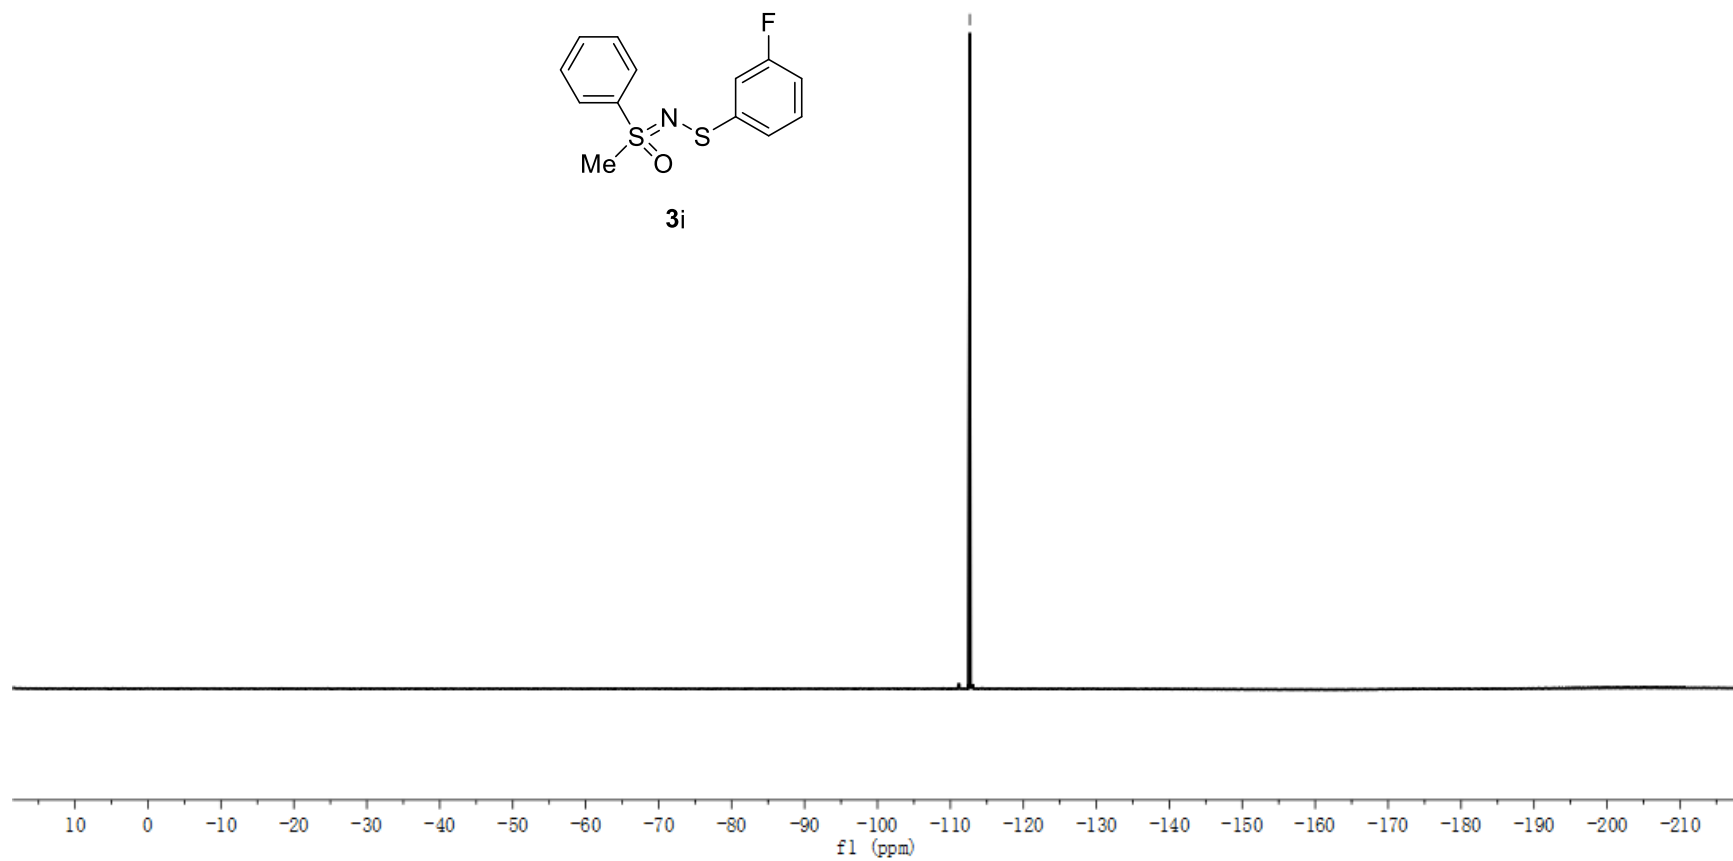

<sup>1</sup>H NMR spectra of compound **3j** (400 MHz, CDCl<sub>3</sub>)

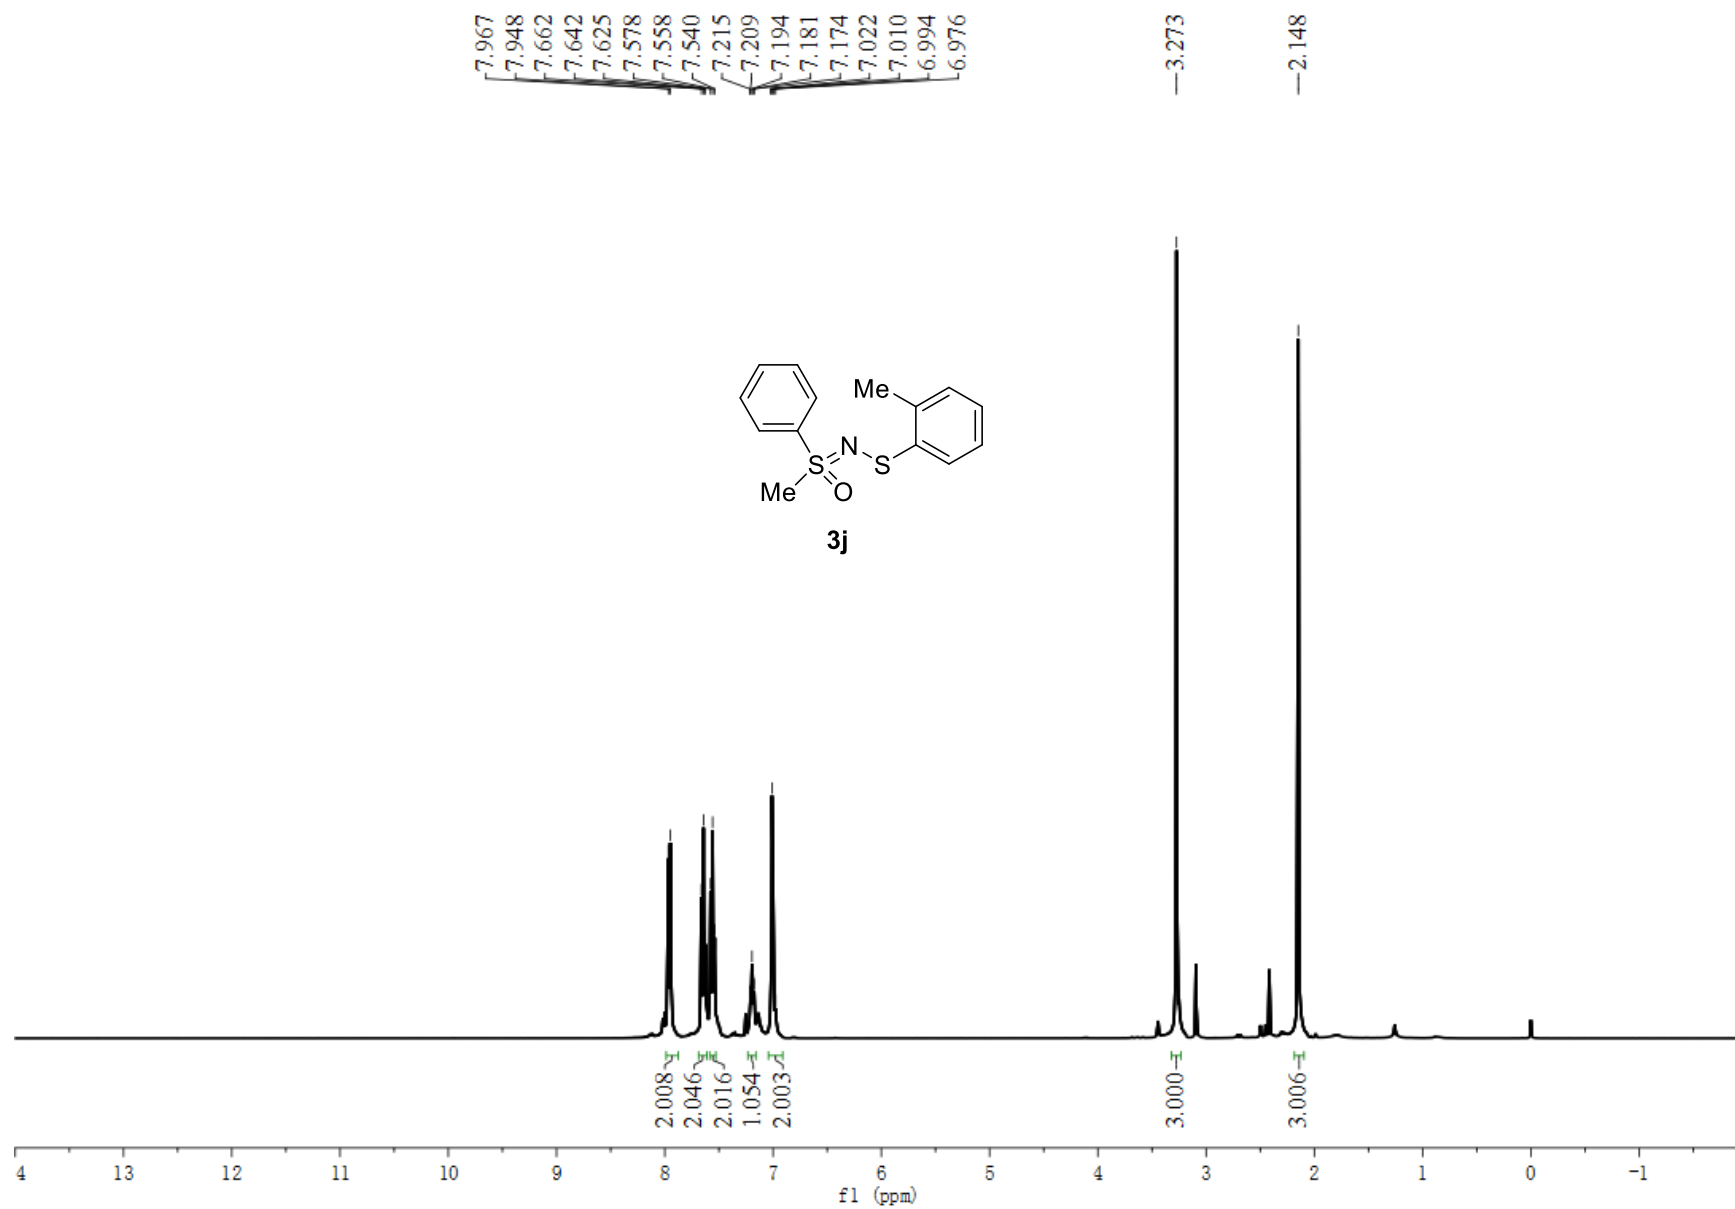

$^{13}\text{C}$  NMR spectra of compound **3j** (101 MHz,  $\text{CDCl}_3$ )

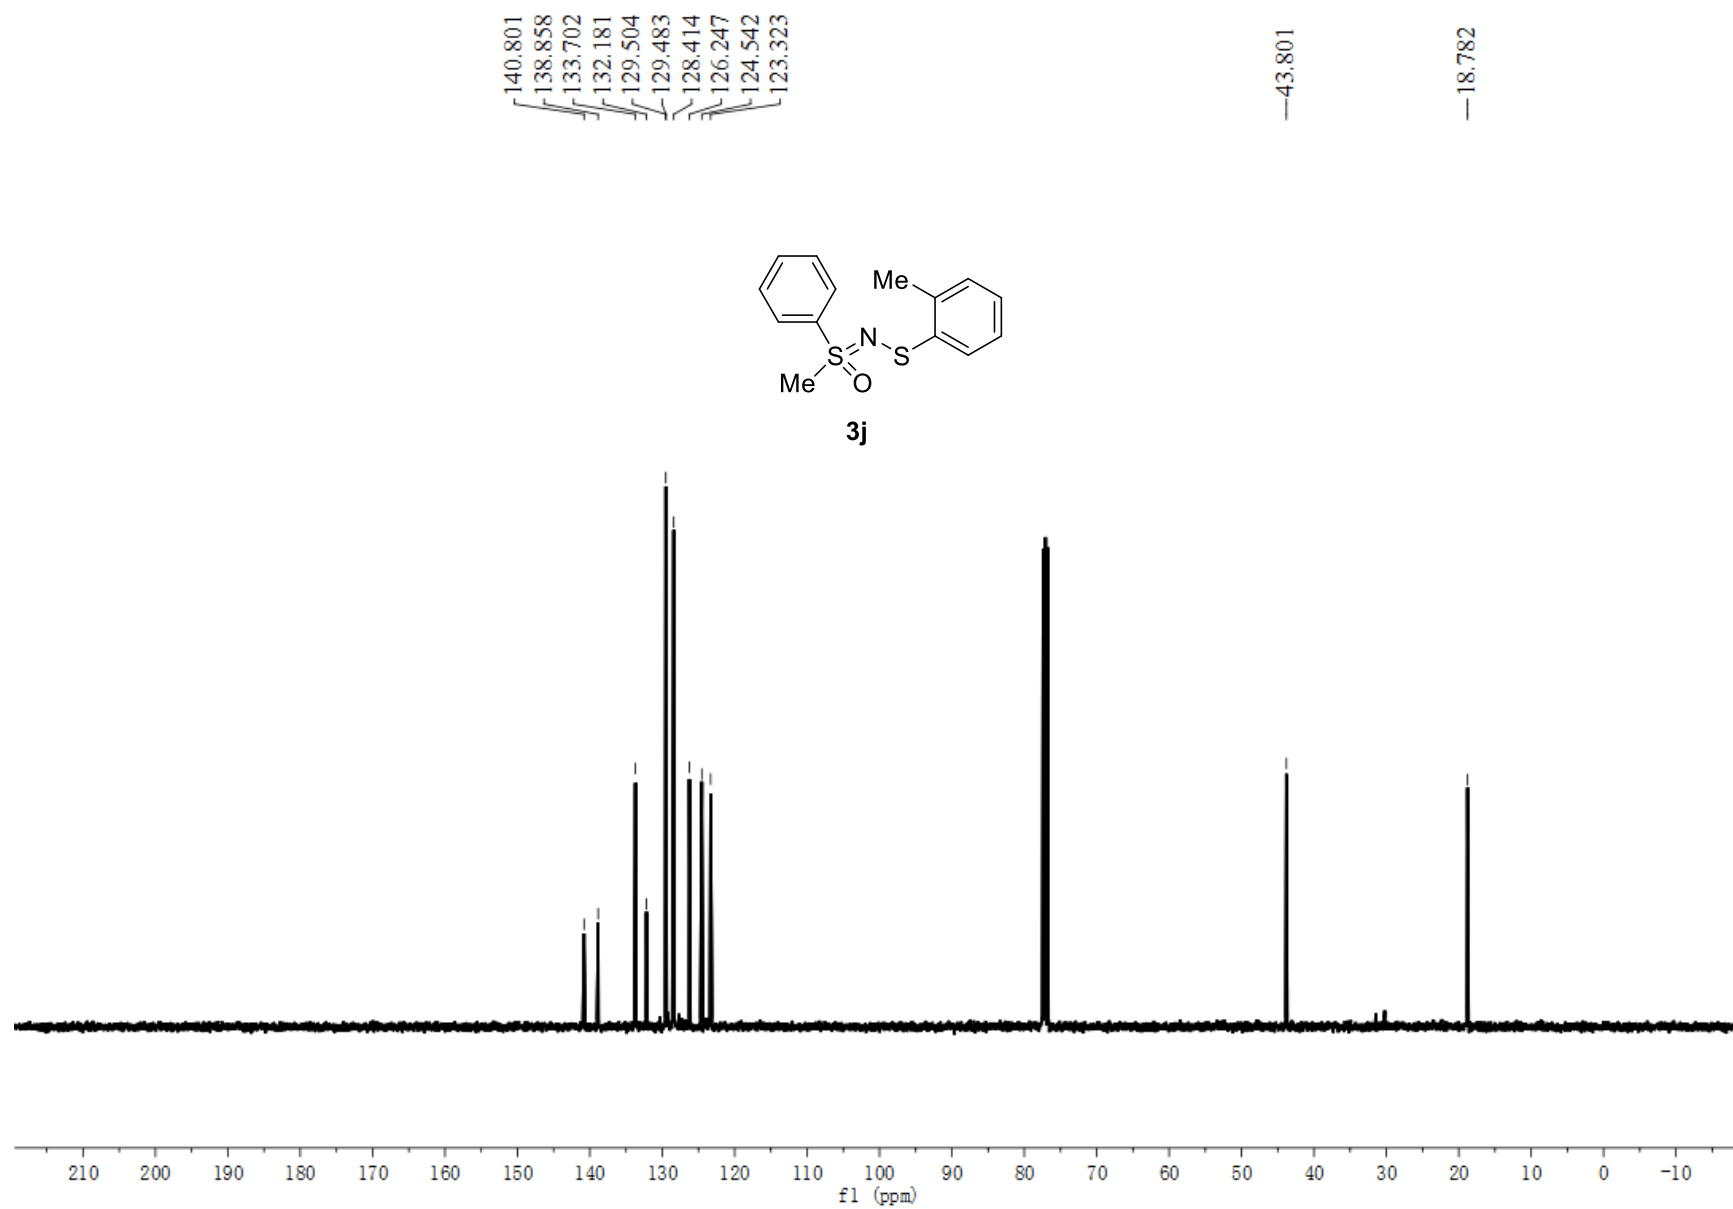

<sup>1</sup>H NMR spectra of compound **3k** (400 MHz, CDCl<sub>3</sub>)

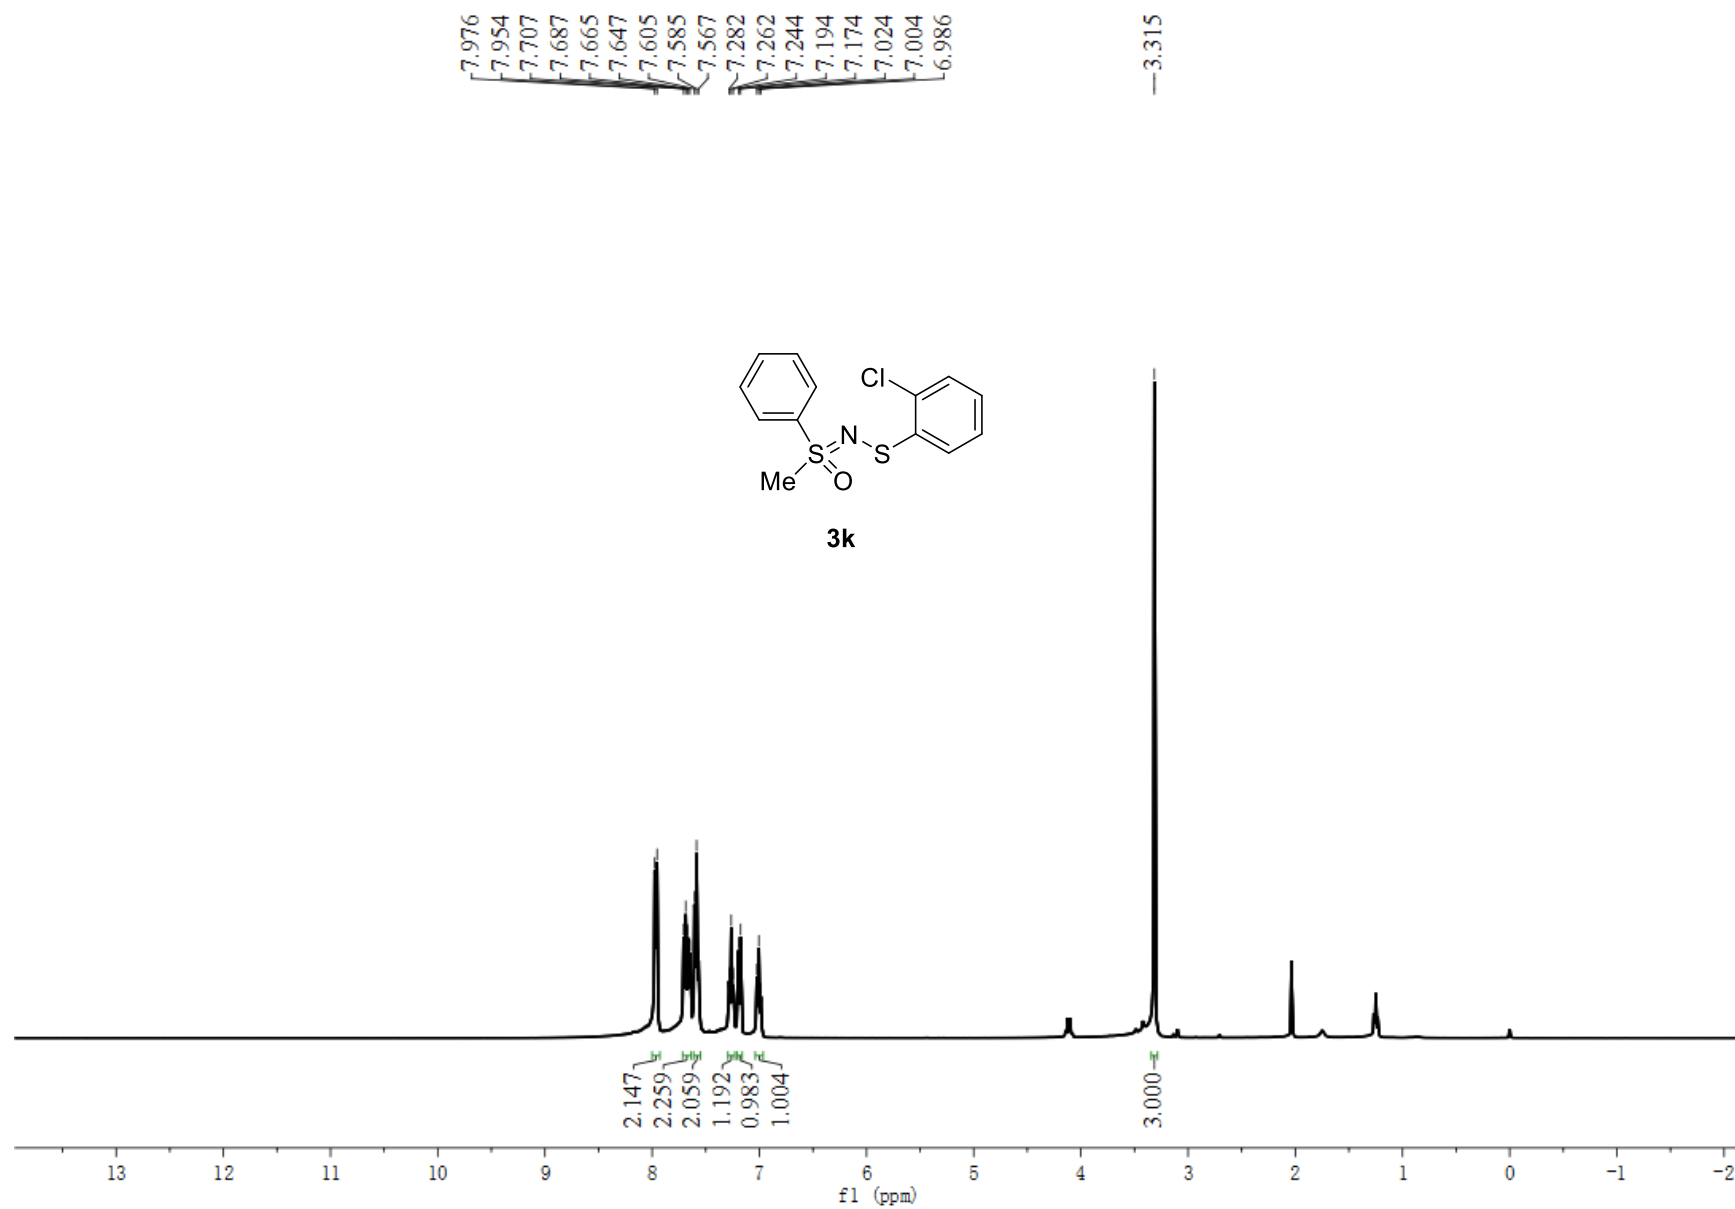

$^{13}\text{C}$  NMR spectra of compound **3k** (101 MHz,  $\text{CDCl}_3$ )

141.394  
138.557  
133.943  
129.673  
128.737  
128.363  
126.977  
126.896  
125.223  
124.145

—44.044

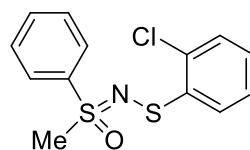

**3k**

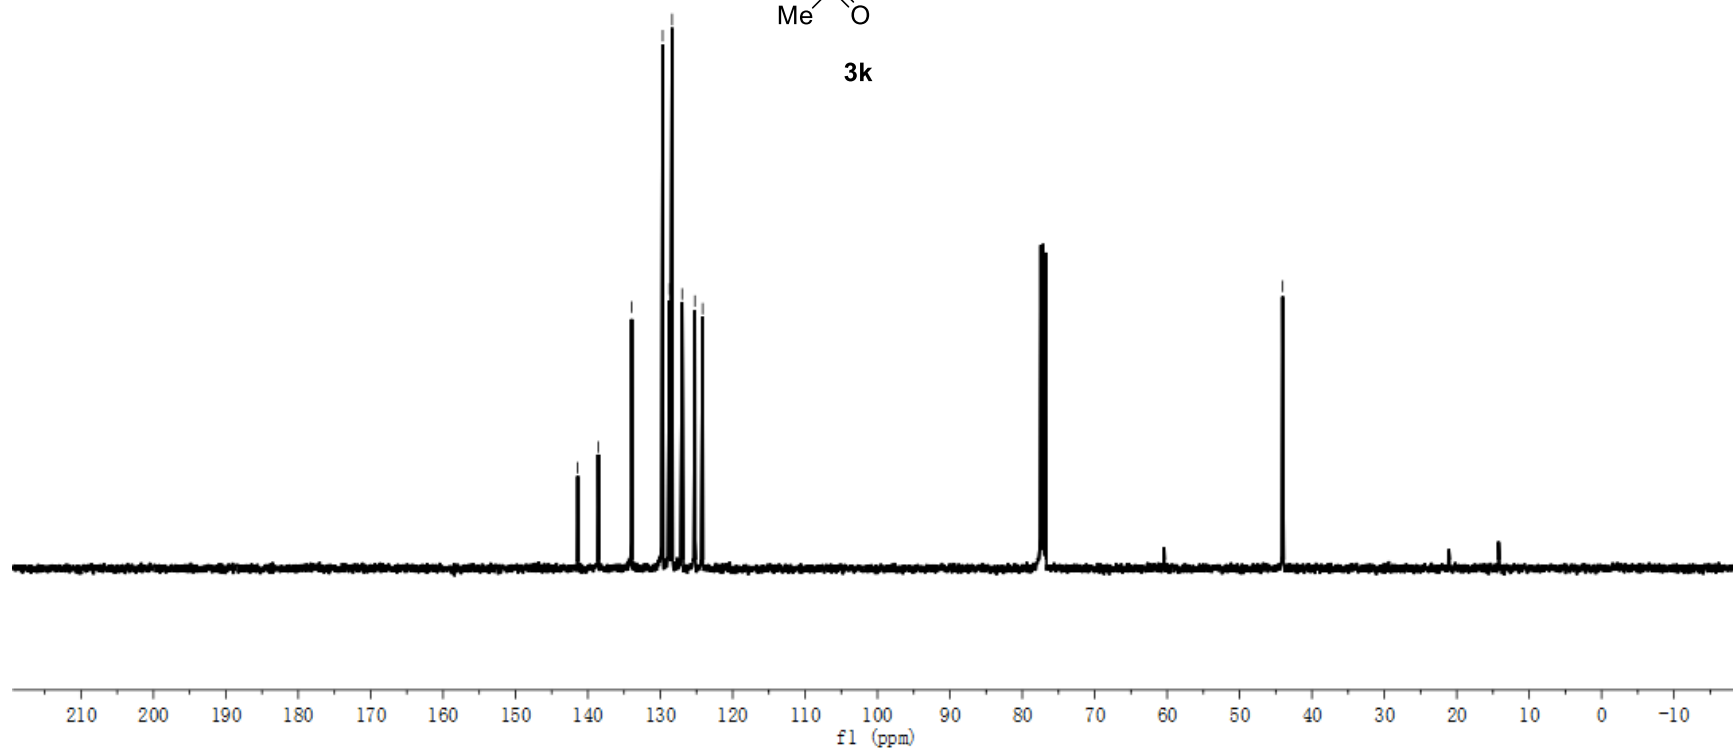

<sup>1</sup>H NMR spectra of compound **3I** (400 MHz, CDCl<sub>3</sub>)

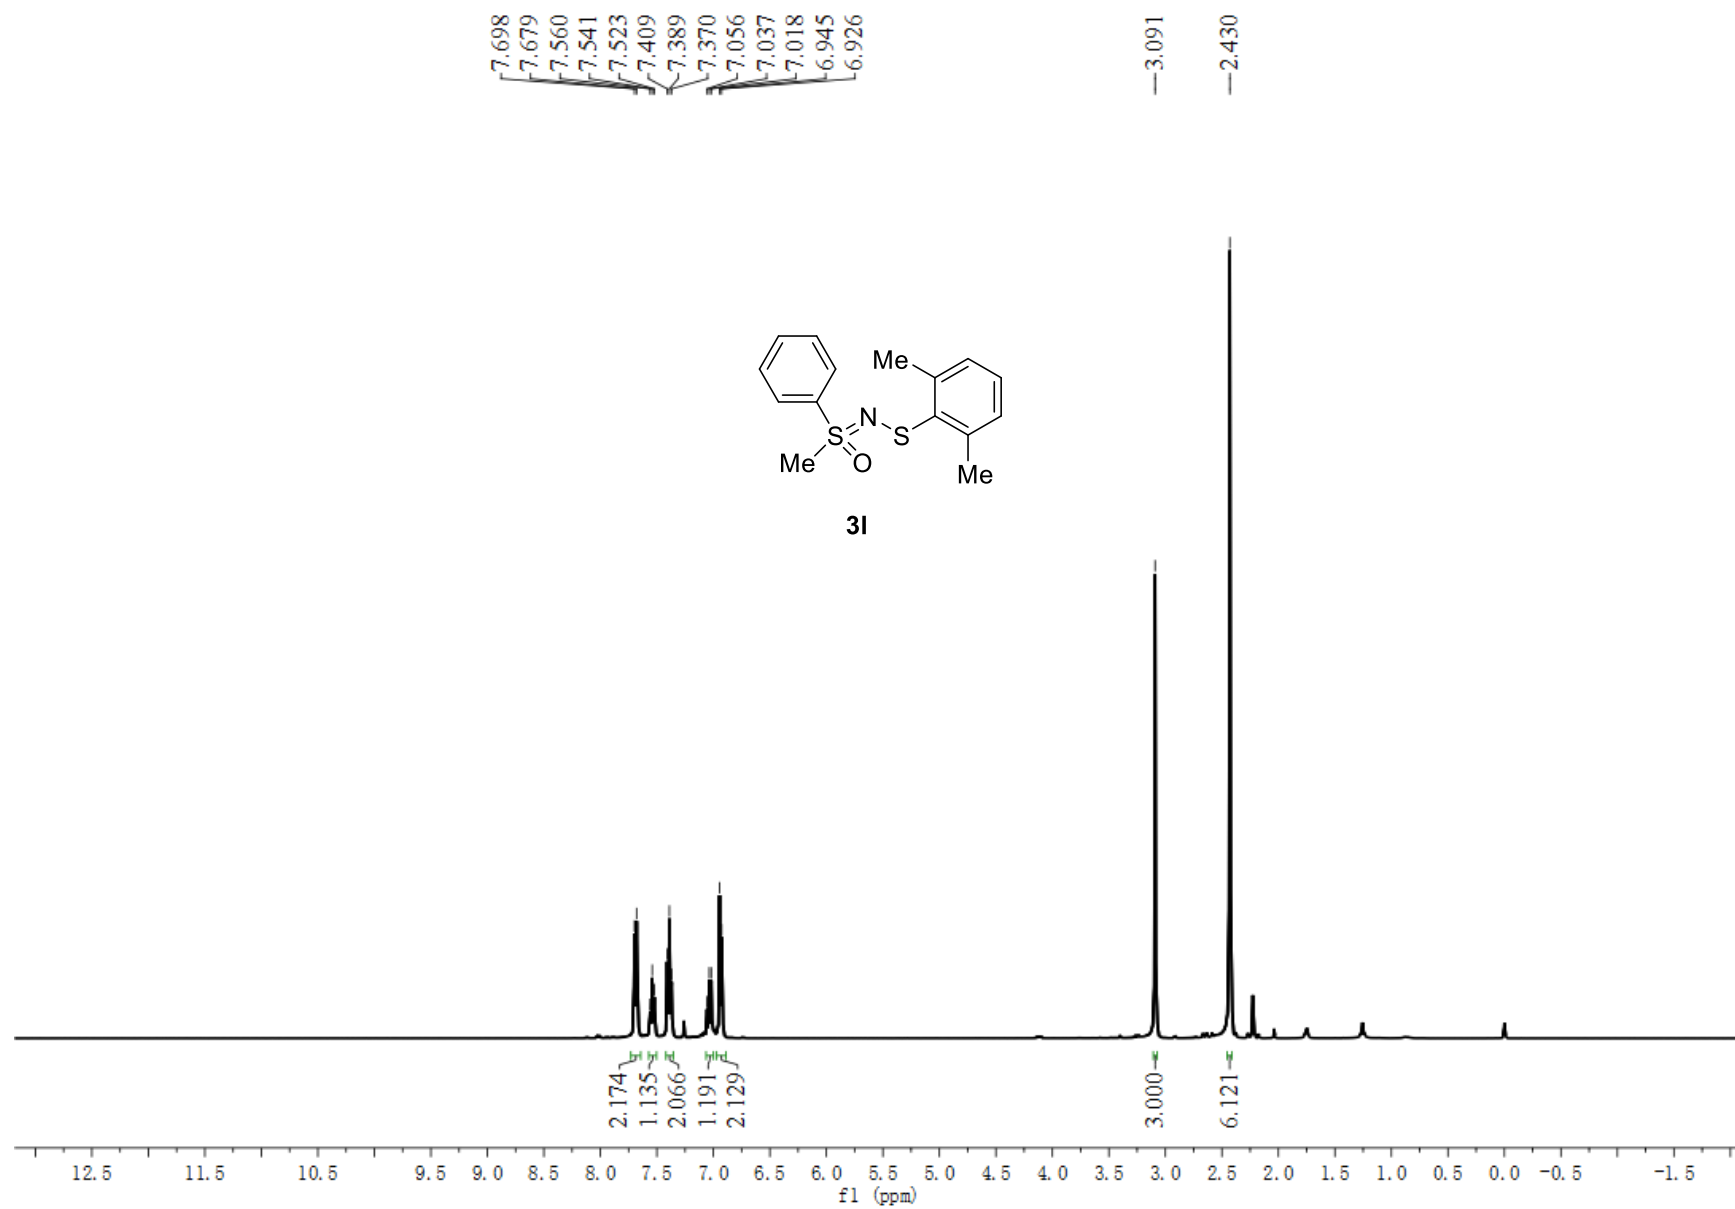

$^{13}\text{C}$  NMR spectra of compound **3I** (101 MHz,  $\text{CDCl}_3$ )

141.762  
139.062  
137.547  
133.148  
129.047  
128.717  
128.597  
127.770

—44.174

—21.573

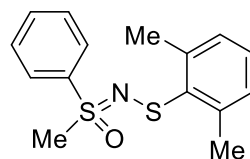

**3I**

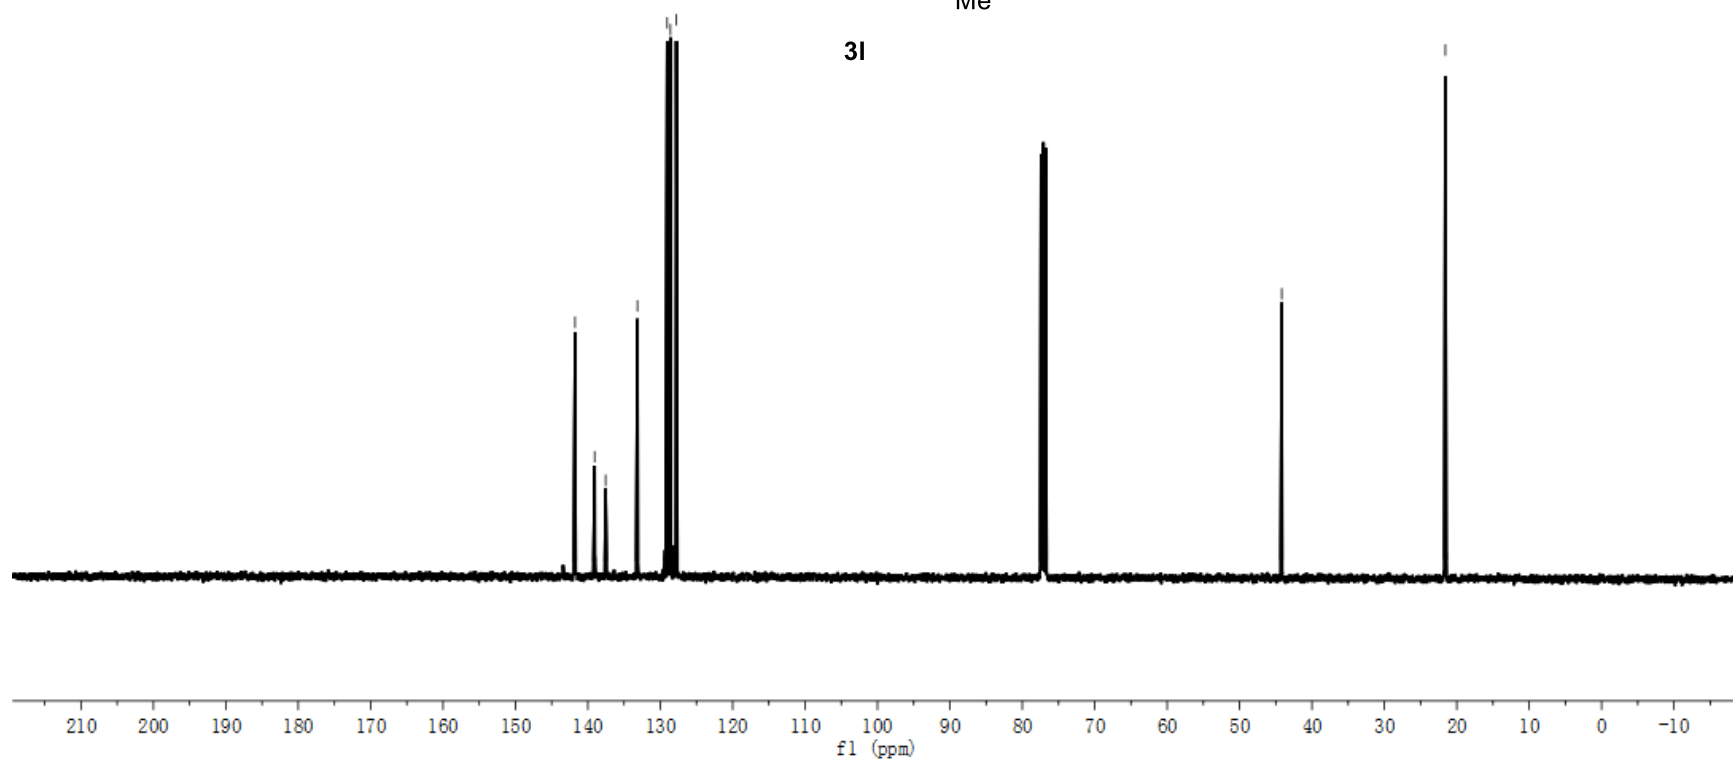

<sup>1</sup>H NMR spectra of compound **3m** (400 MHz, CDCl<sub>3</sub>)

8.362  
8.358  
8.350  
8.346  
8.005  
7.987  
7.985  
7.982  
7.684  
7.667  
7.664  
7.646  
7.624  
7.605  
7.591  
7.587  
7.584  
7.573  
6.954  
6.951  
6.938  
6.933  
6.924  
6.921  
— 3.350

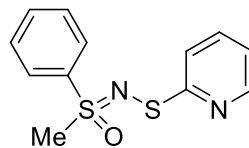

**3m**

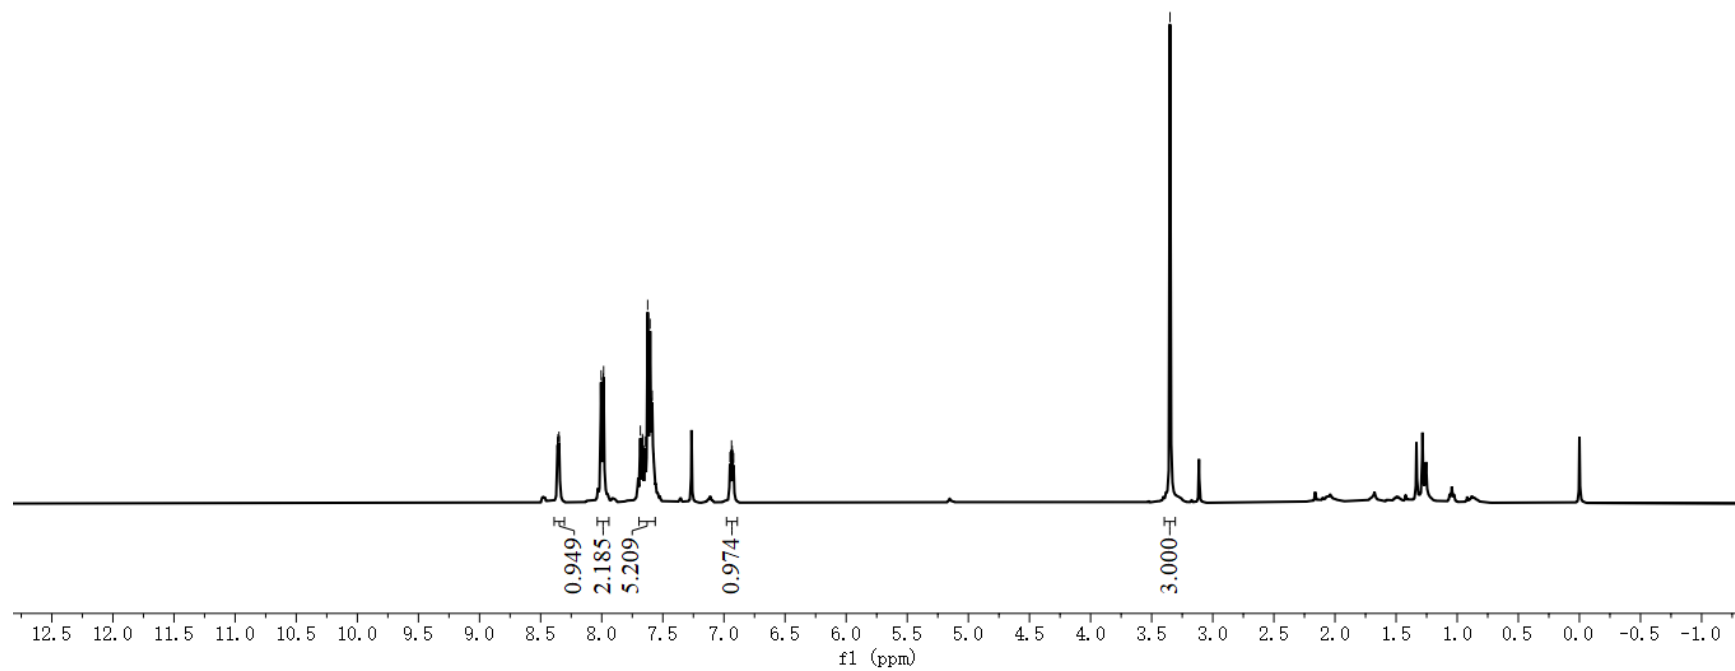

<sup>13</sup>C NMR spectra of compound **3m** (101 MHz, CDCl<sub>3</sub>)

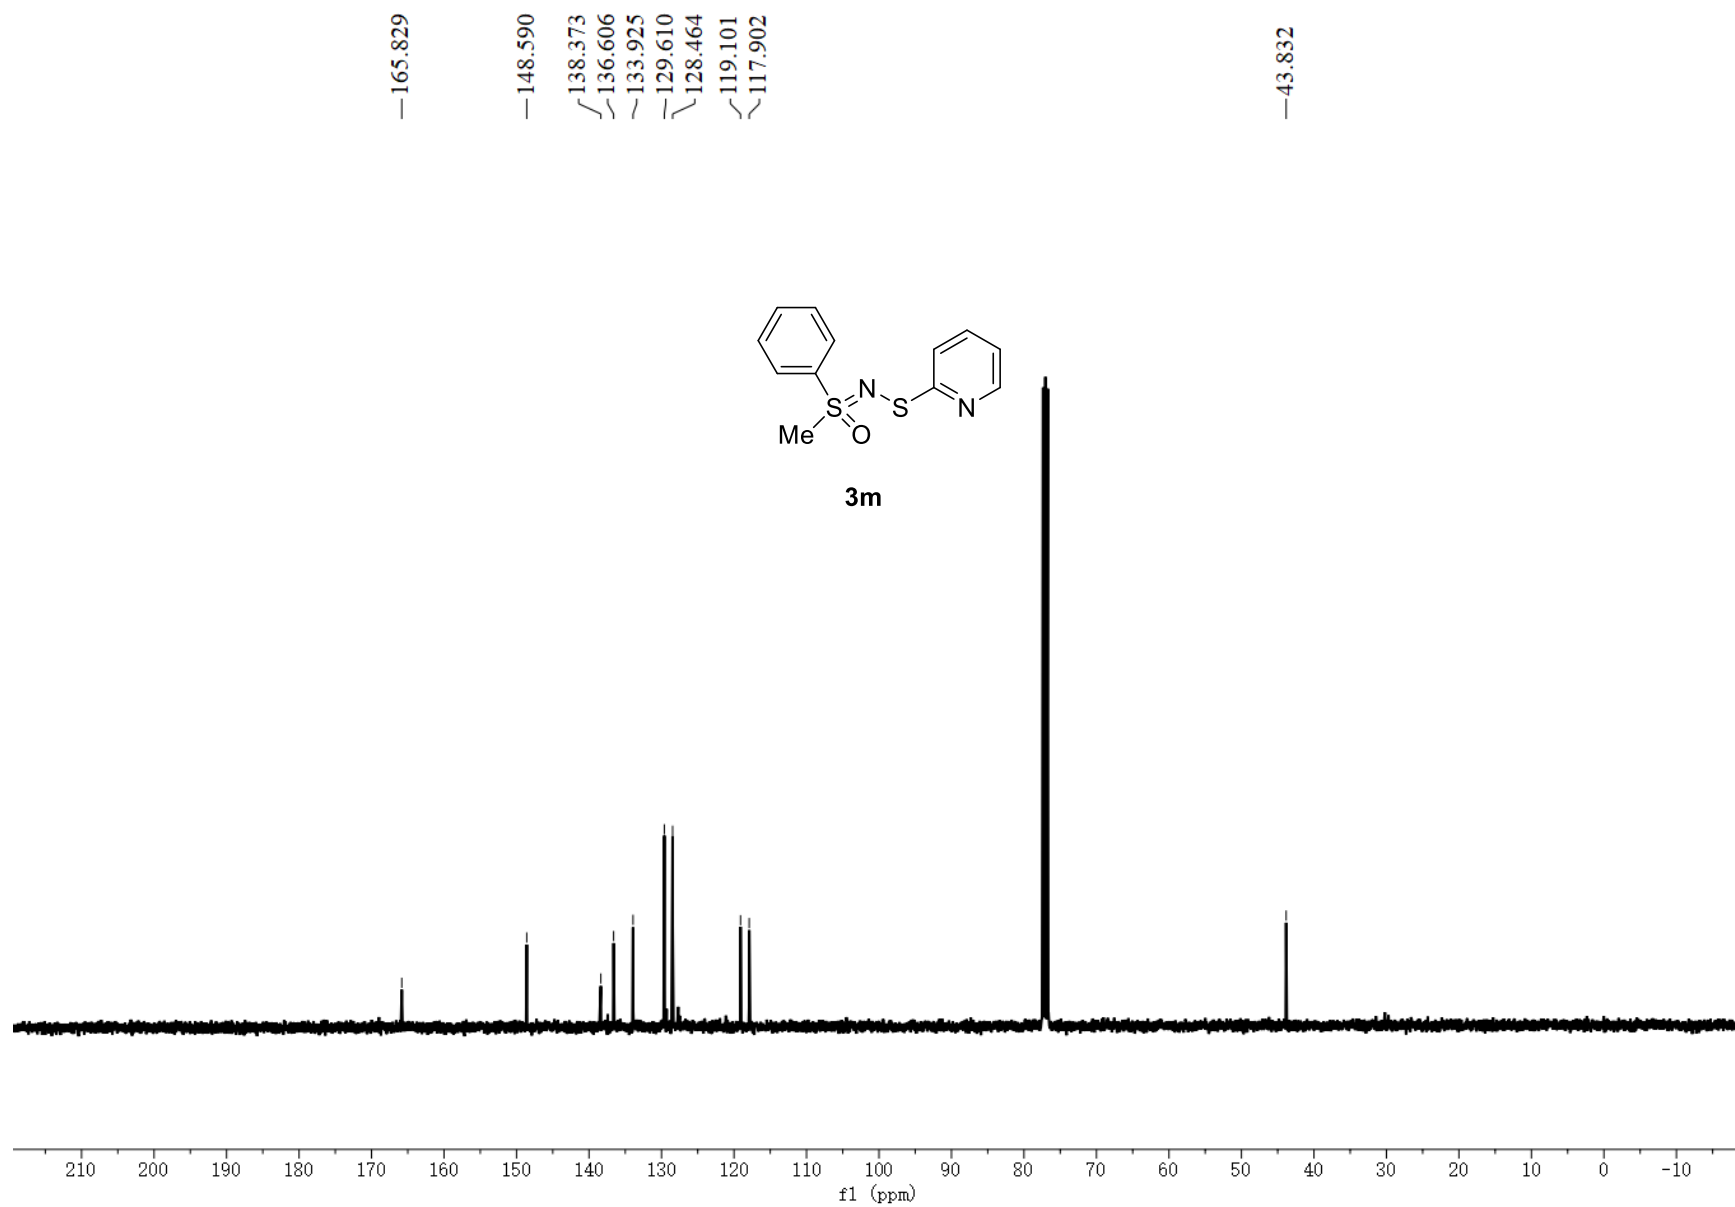

<sup>1</sup>H NMR spectra of compound **3n** (400 MHz, CDCl<sub>3</sub>)

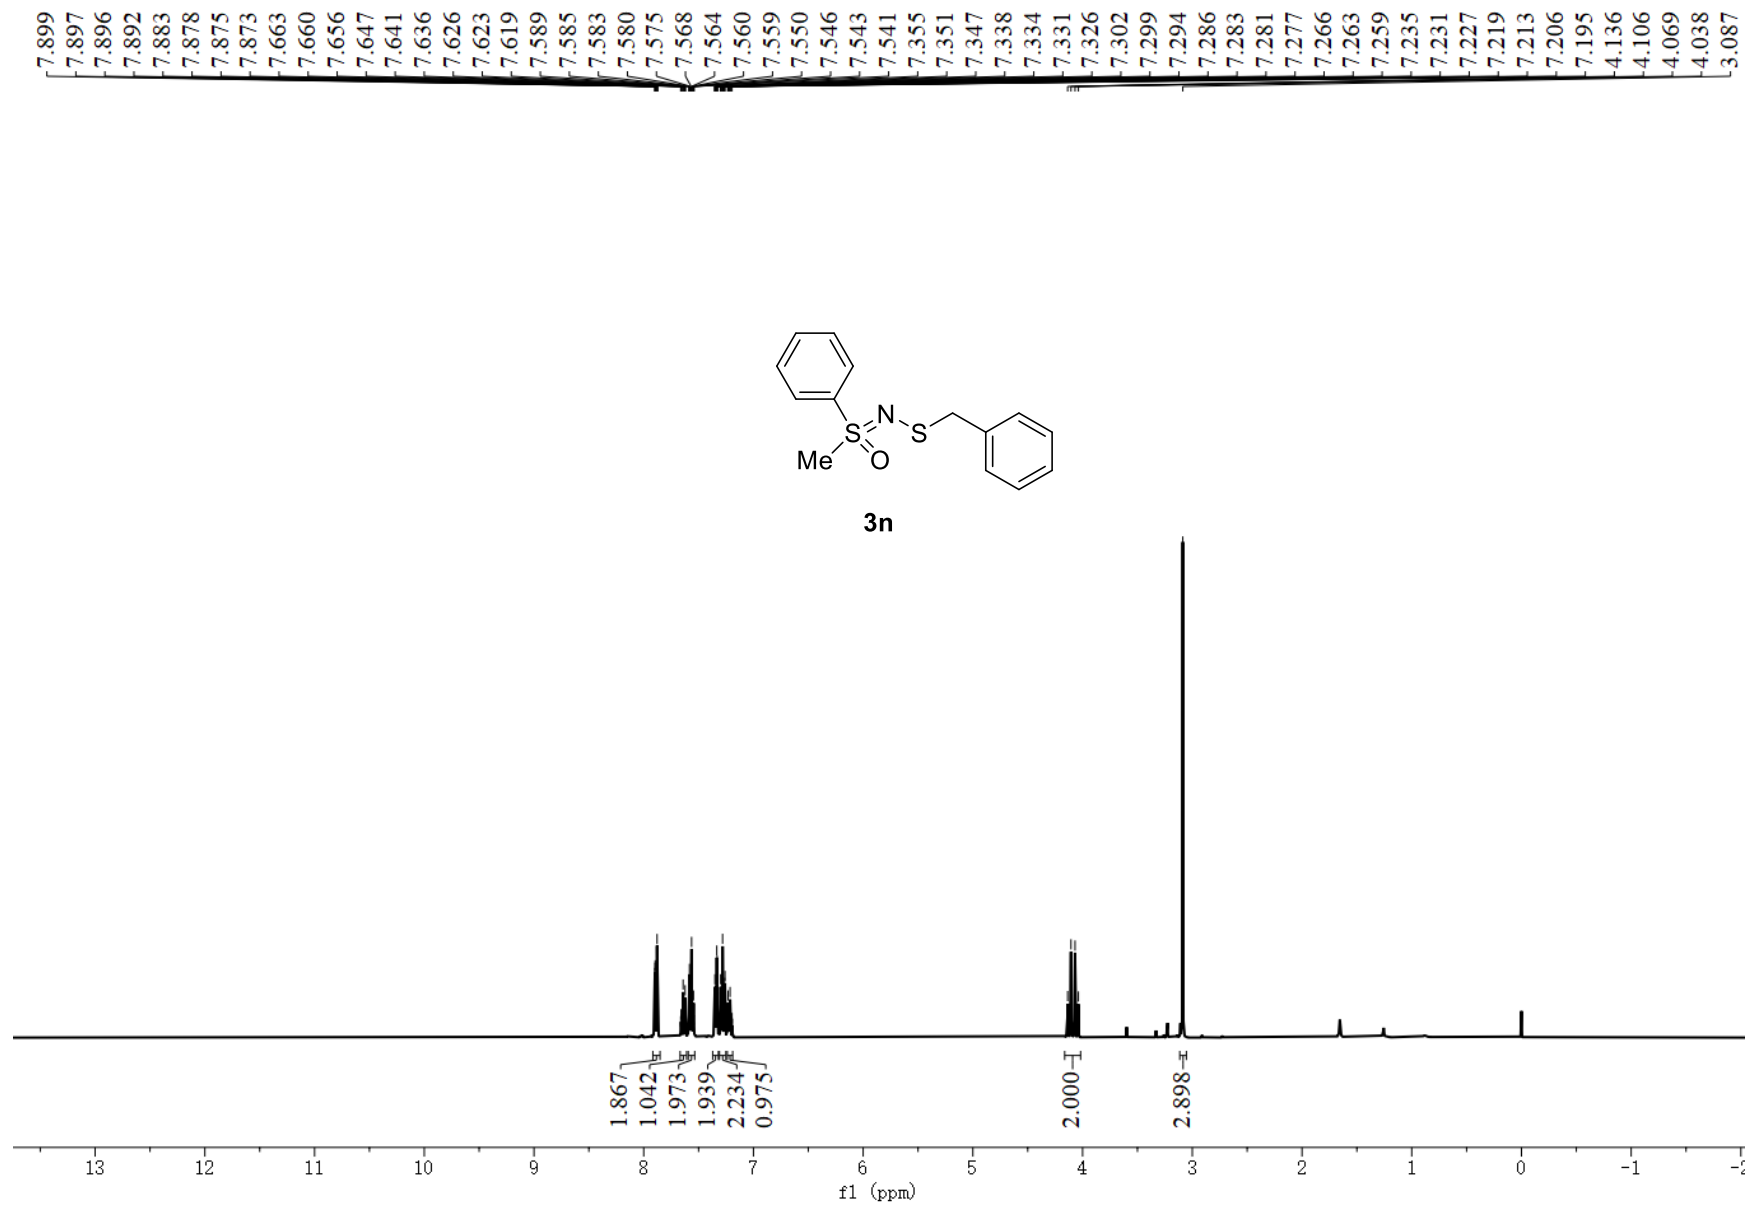

$^{13}\text{C}$  NMR spectra of compound **3n** (101 MHz,  $\text{CDCl}_3$ )

139.190  
136.834  
133.459  
129.545  
129.423  
128.451  
128.356  
127.051

45.943  
43.435

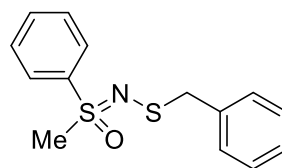

**3n**

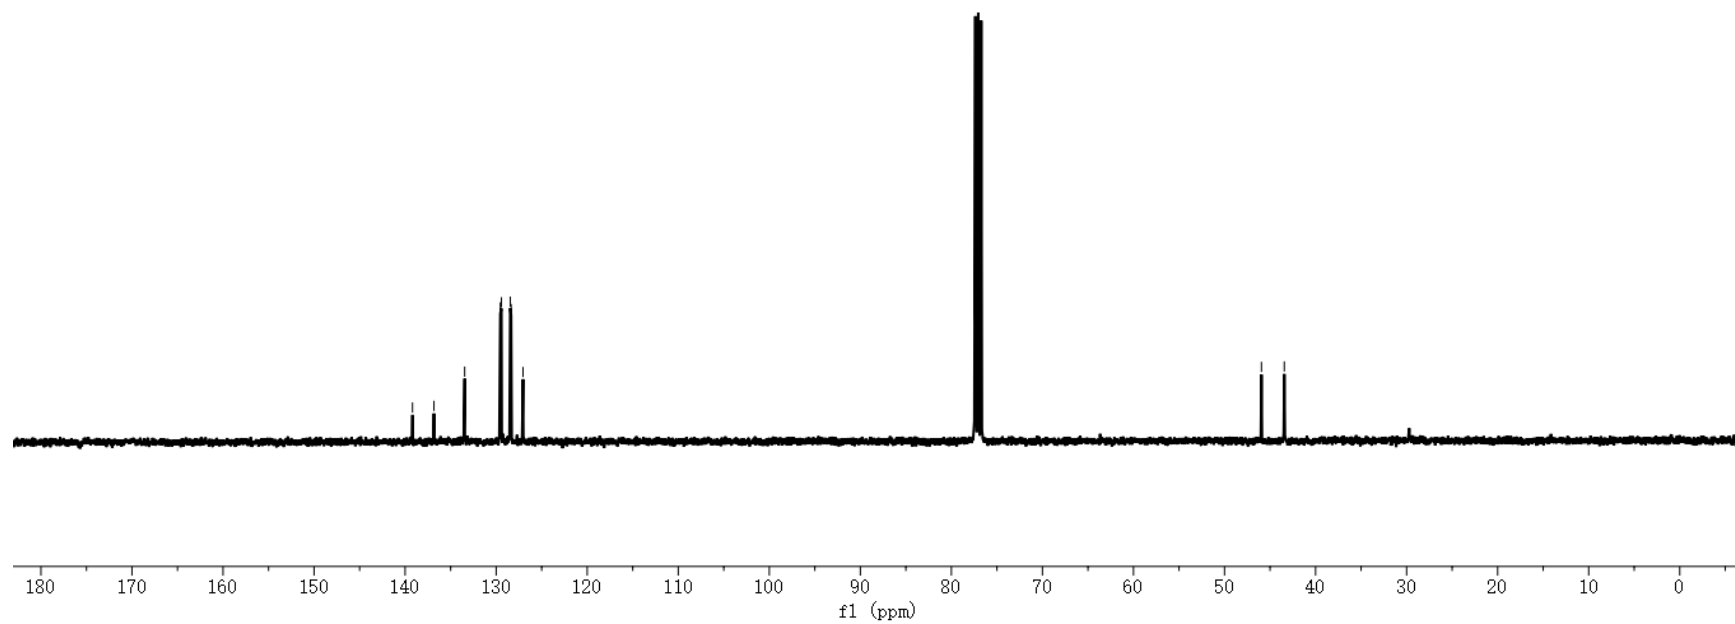

<sup>1</sup>H NMR spectra of compound **3o** (400 MHz, CDCl<sub>3</sub>)

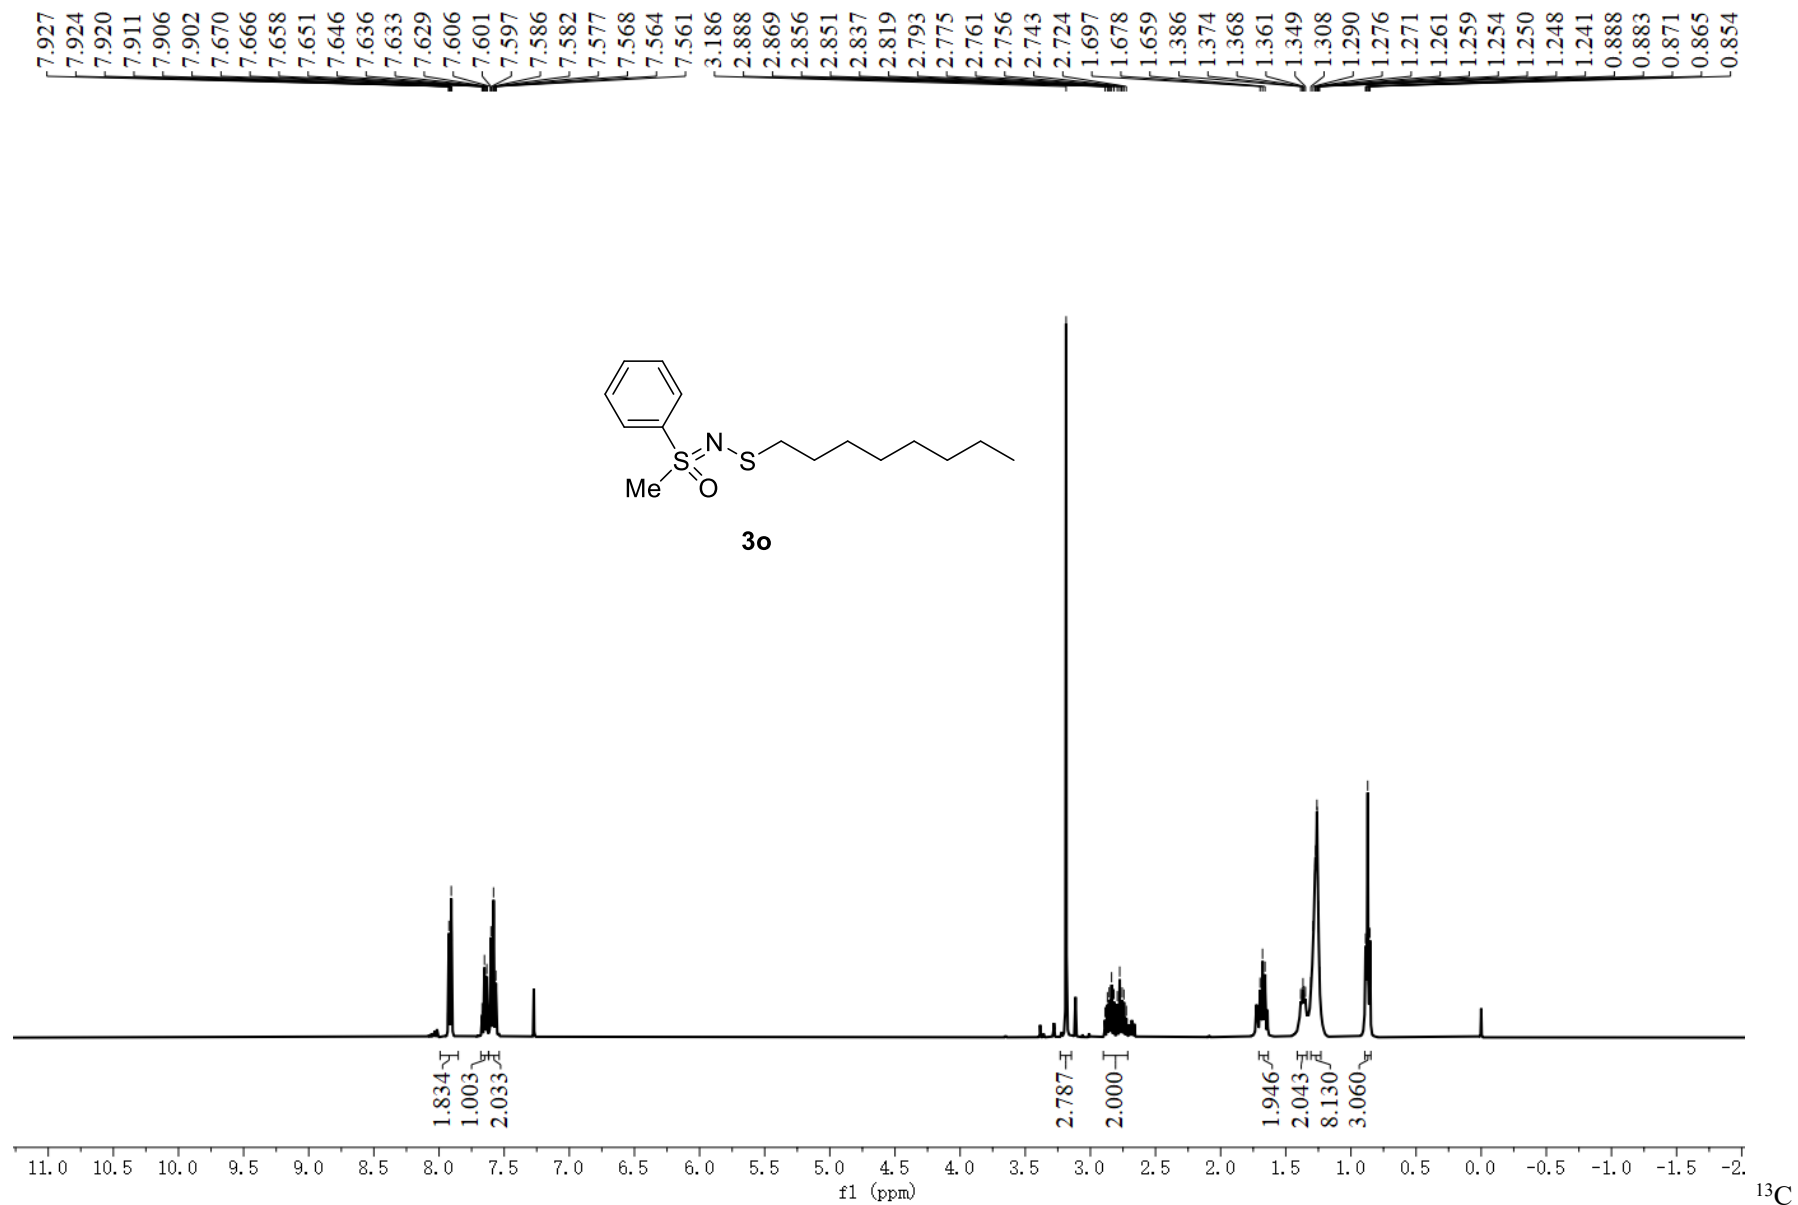

NMR spectra of compound **3o** (101 MHz, CDCl<sub>3</sub>)

139.340  
133.395  
129.422  
128.533

43.861  
41.137  
31.838  
29.243  
29.224  
28.794  
27.825  
22.657  
14.112

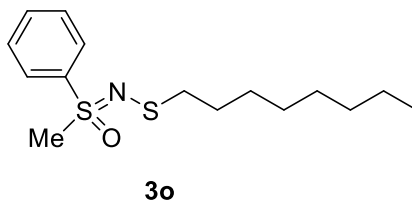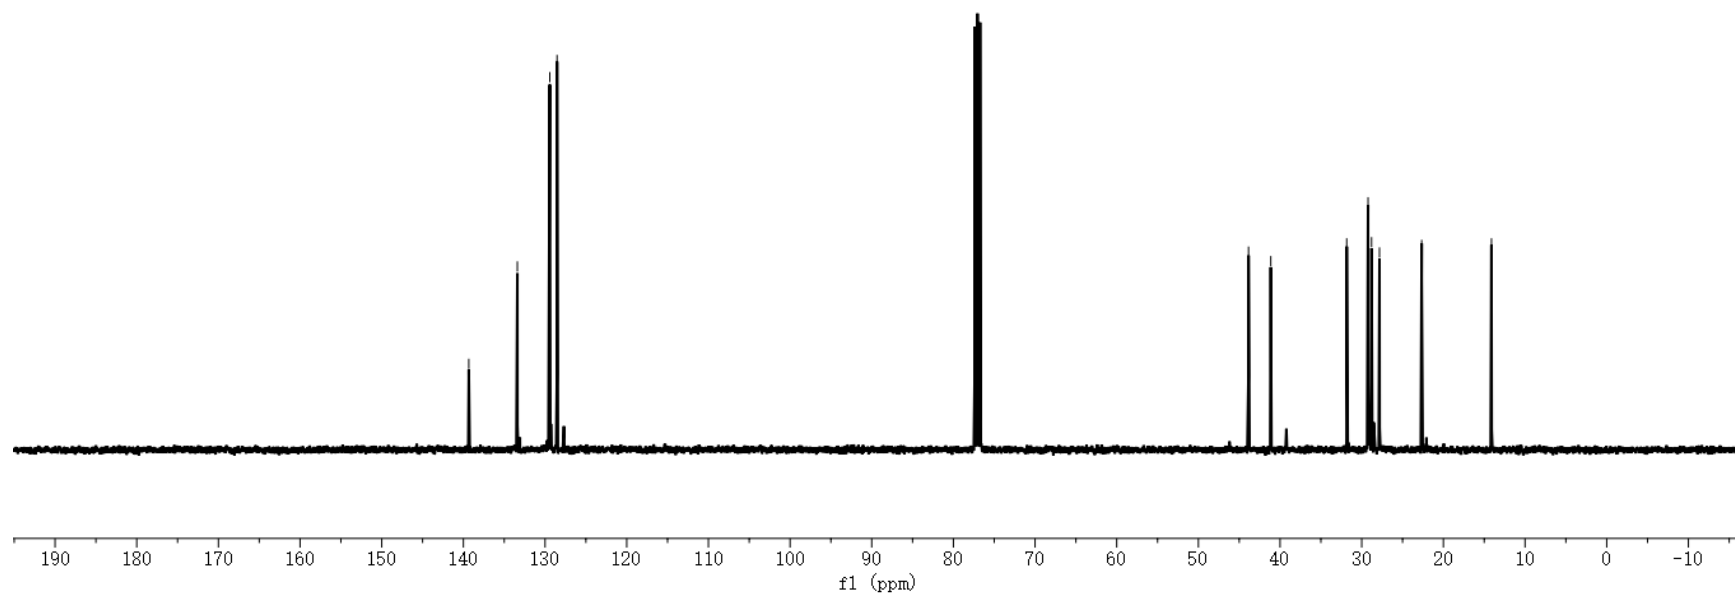

$^1\text{H}$  NMR spectra of compound **3p** (400 MHz,  $\text{CDCl}_3$ )

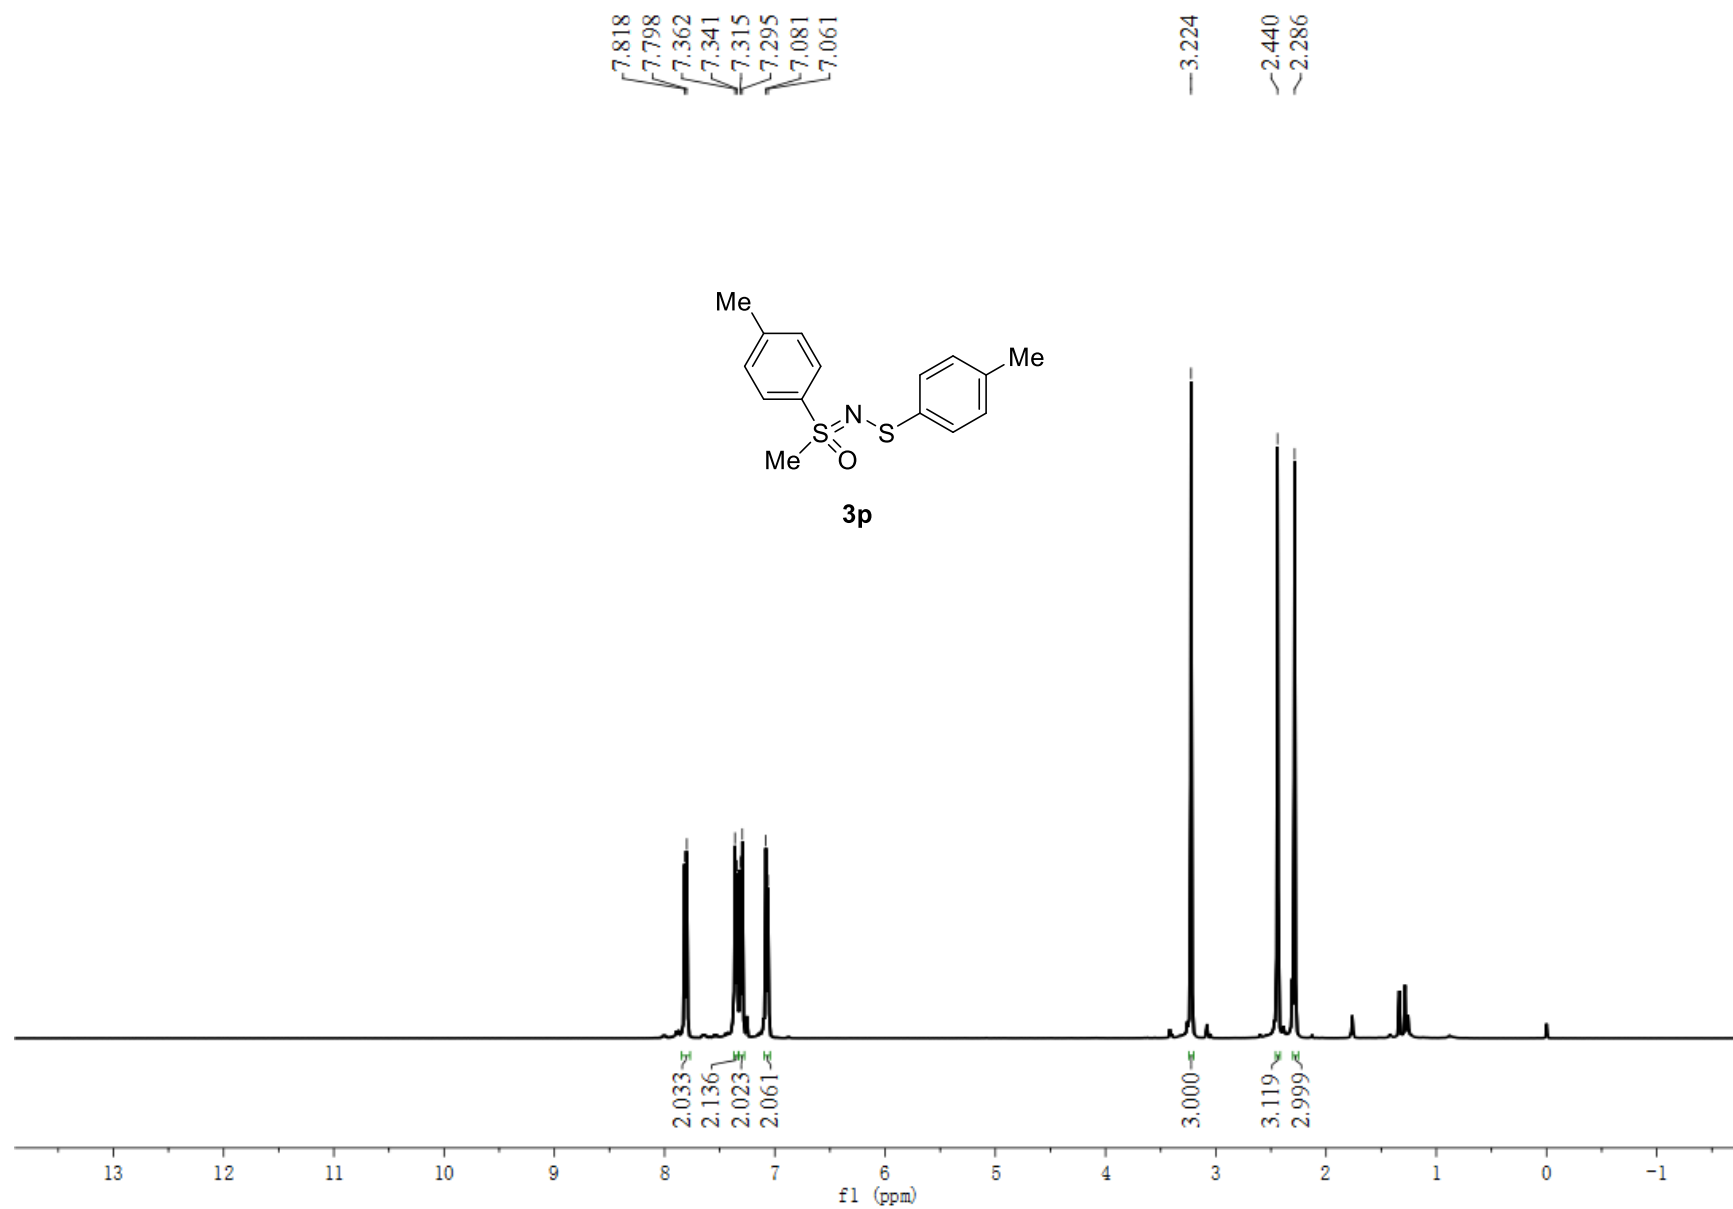

$^{13}\text{C}$  NMR spectra of compound **3p** (101 MHz,  $\text{CDCl}_3$ )

144.717  
138.524  
135.742  
135.107  
130.148  
129.300  
128.480  
124.835

—43.869

21.629  
21.029

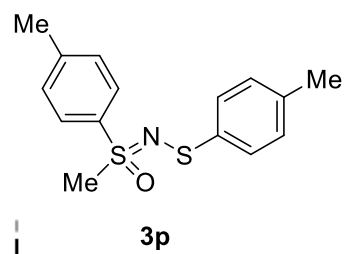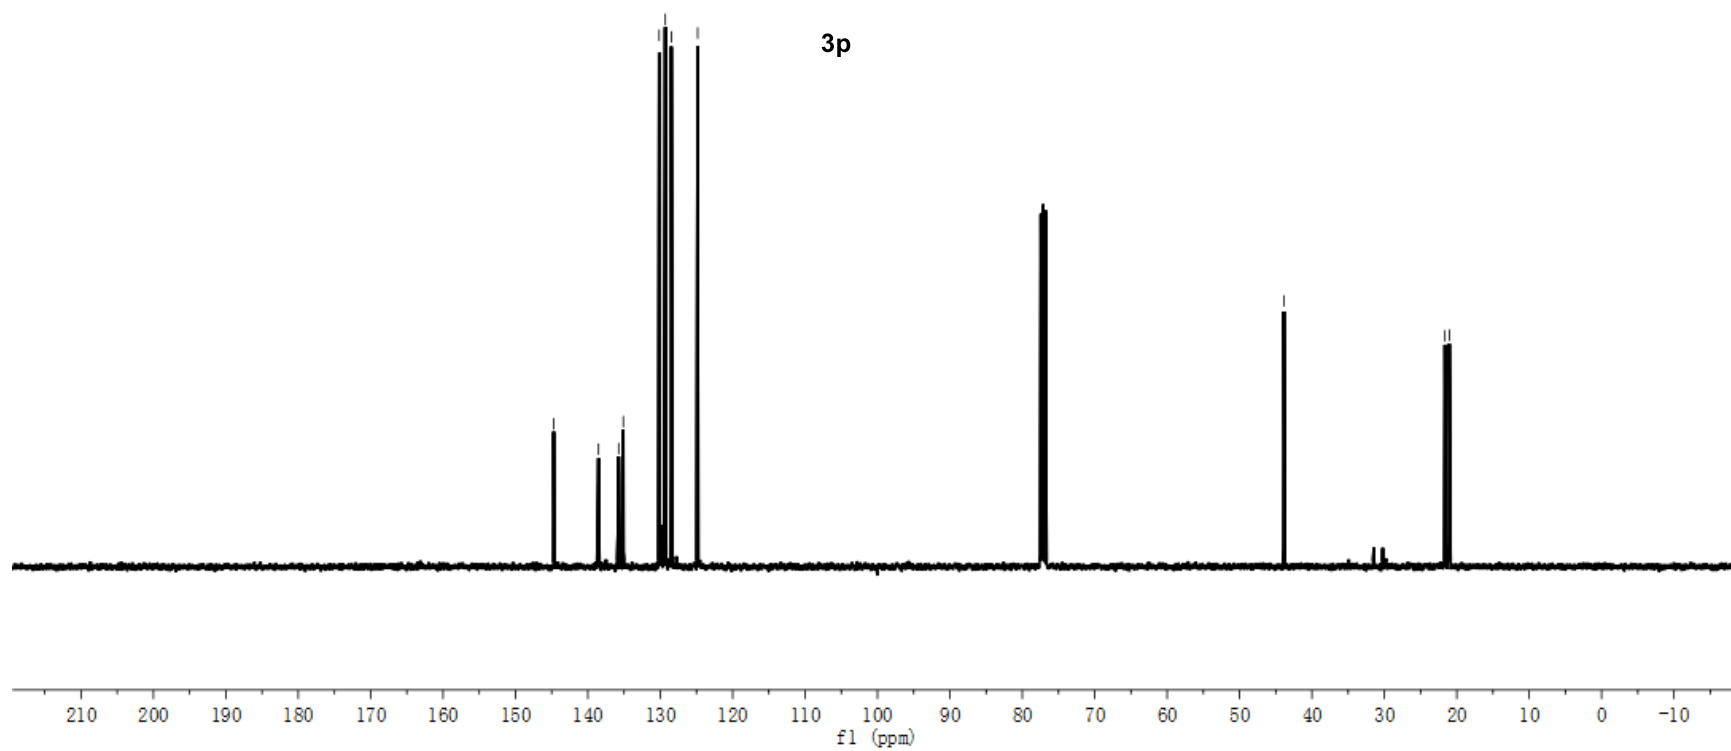

$^1\text{H}$  NMR spectra of compound **3q** (400 MHz,  $\text{CDCl}_3$ )

7.855  
7.838  
7.314  
7.298  
7.082  
7.064  
7.027  
7.022  
7.005  
7.000

3.870

3.227

2.288

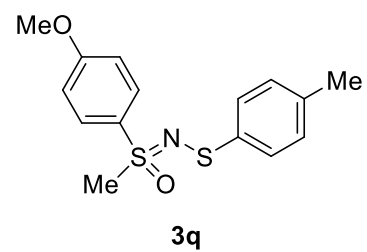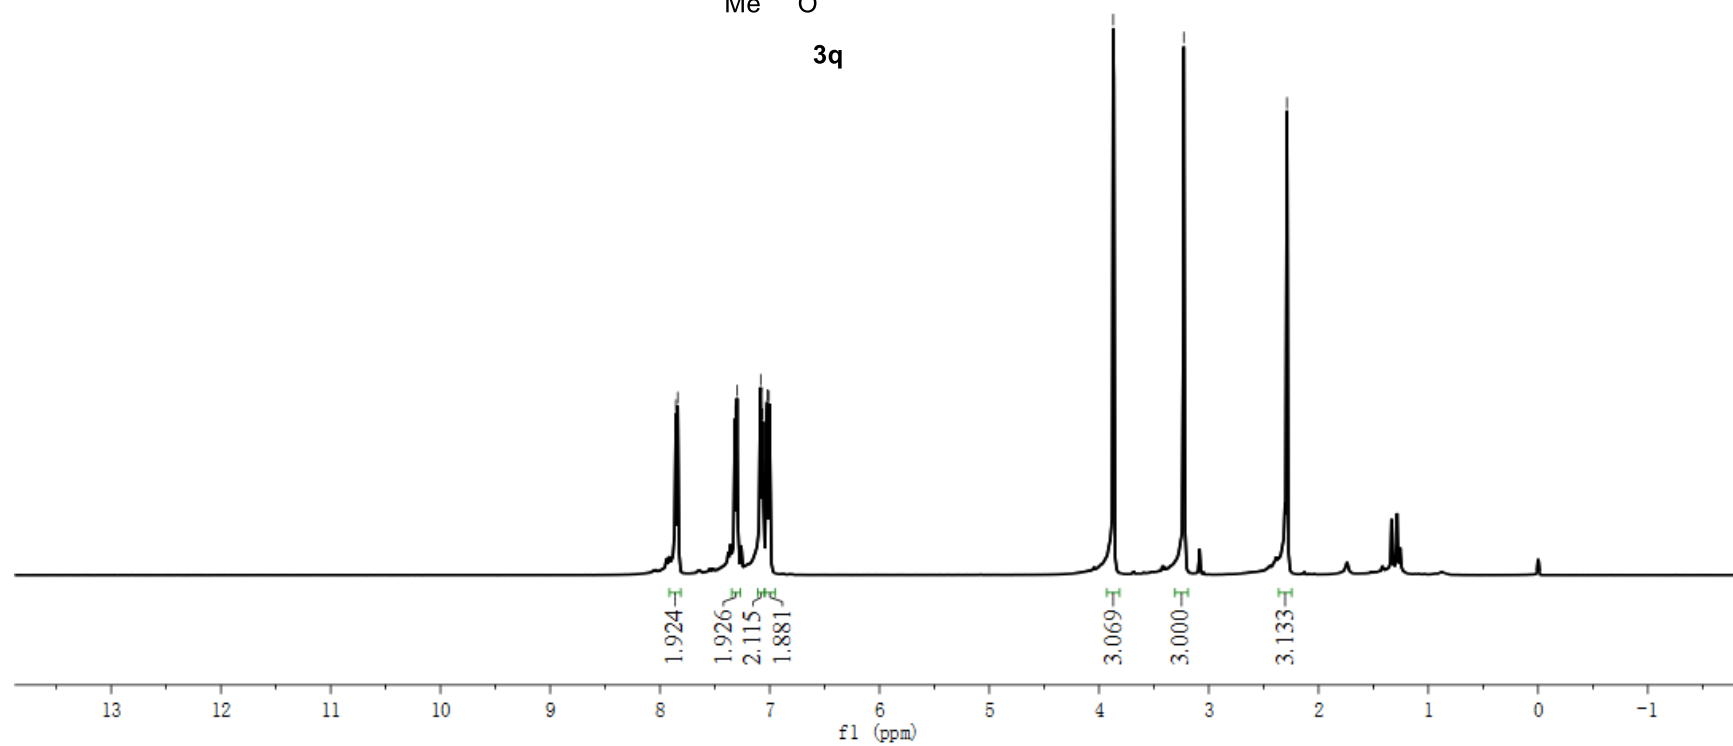

$^{13}\text{C}$  NMR spectra of compound **3q** (101 MHz,  $\text{CDCl}_3$ )

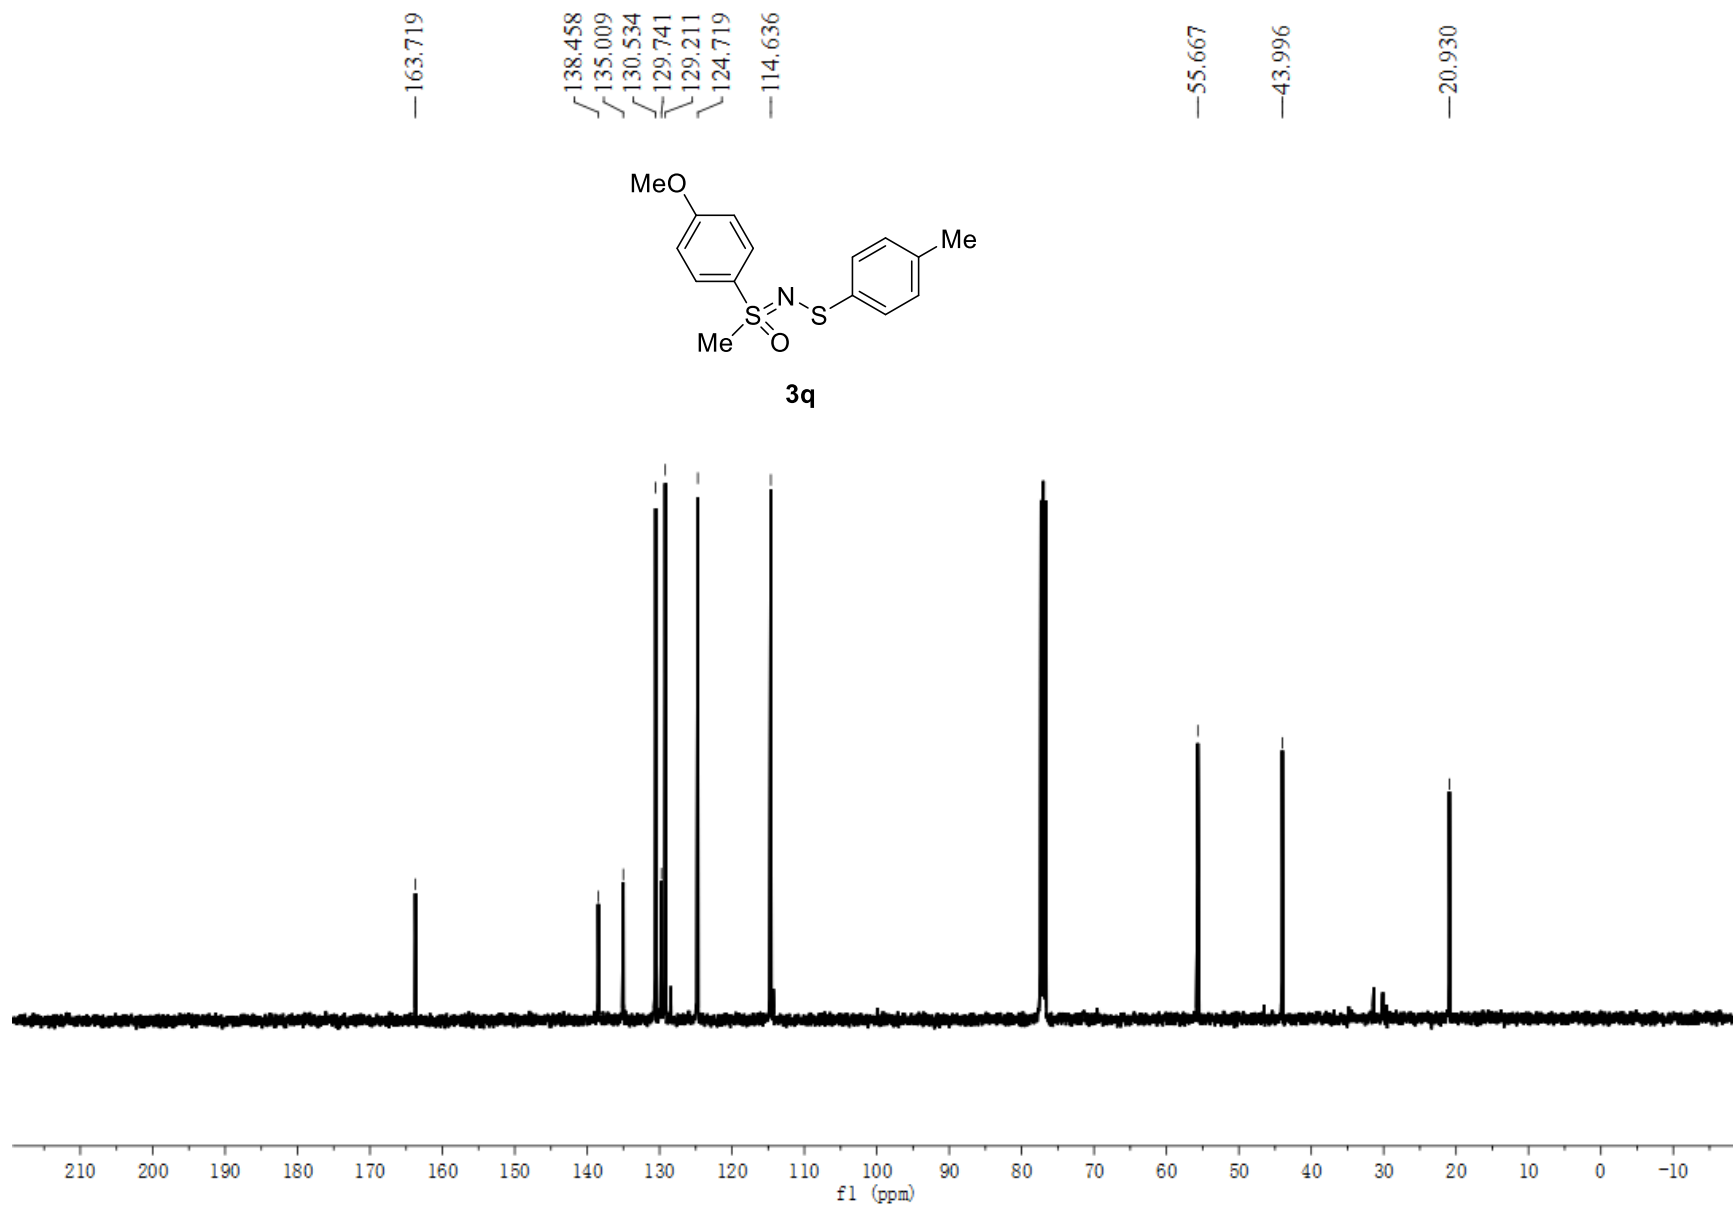

<sup>1</sup>H NMR spectra of compound **3r** (400 MHz, CDCl<sub>3</sub>)

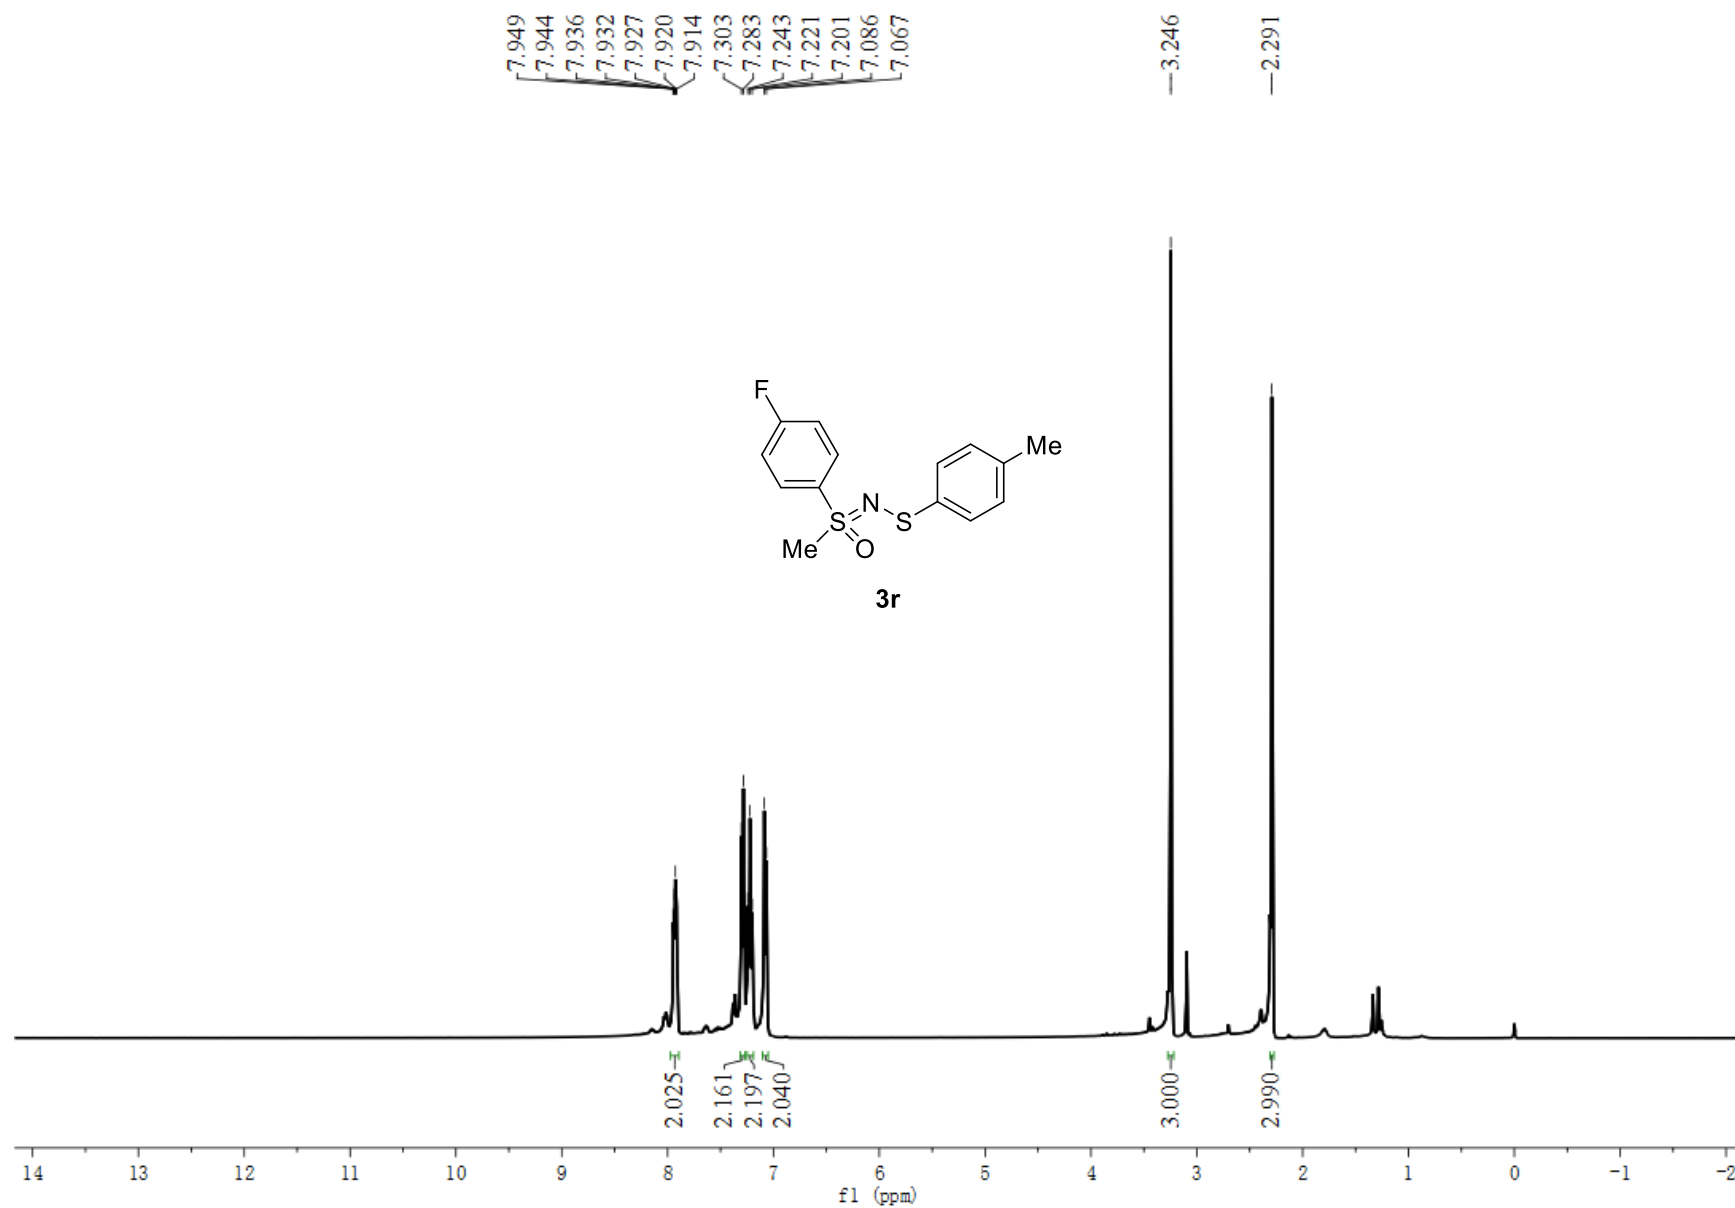

$^{13}\text{C}$  NMR spectra of compound **3r** (101 MHz,  $\text{CDCl}_3$ )

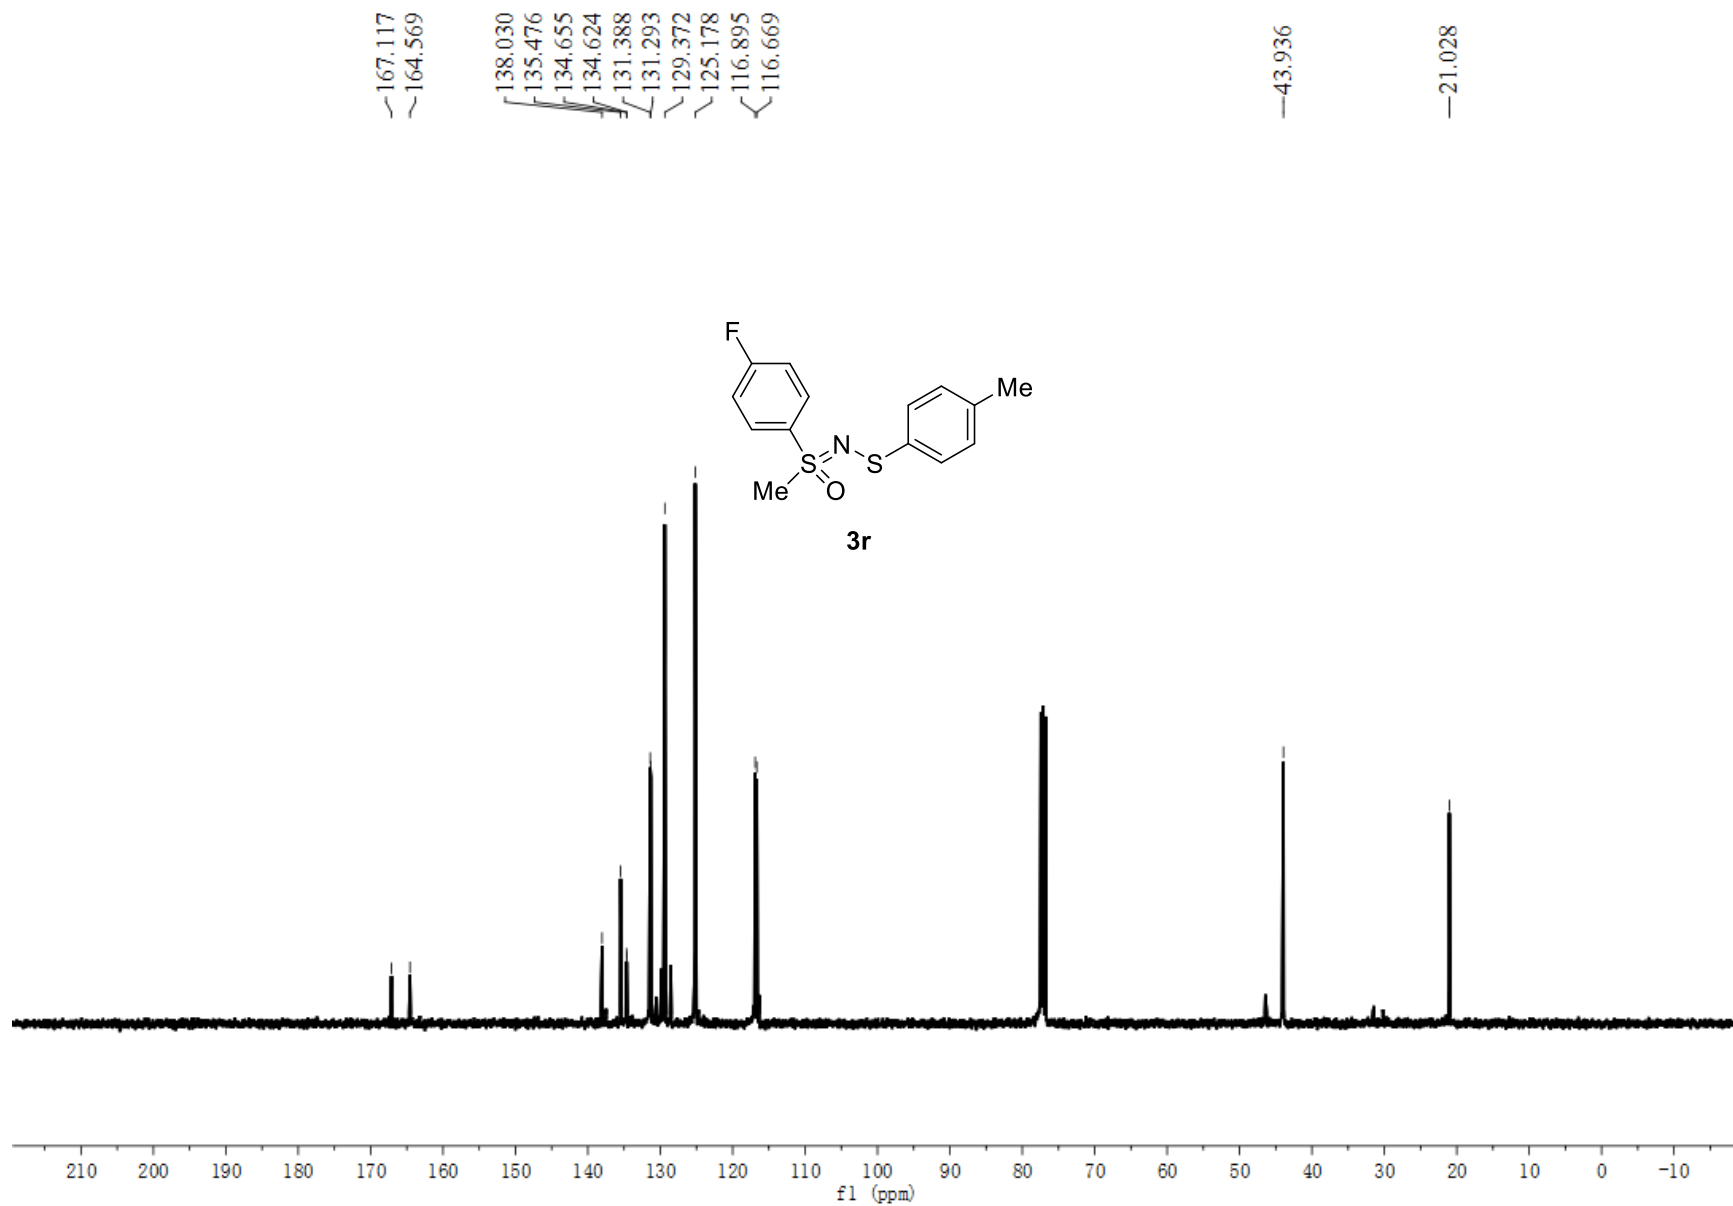

$^{19}\text{F}$  NMR spectra of compound **3r** (376 MHz,  $\text{CDCl}_3$ )

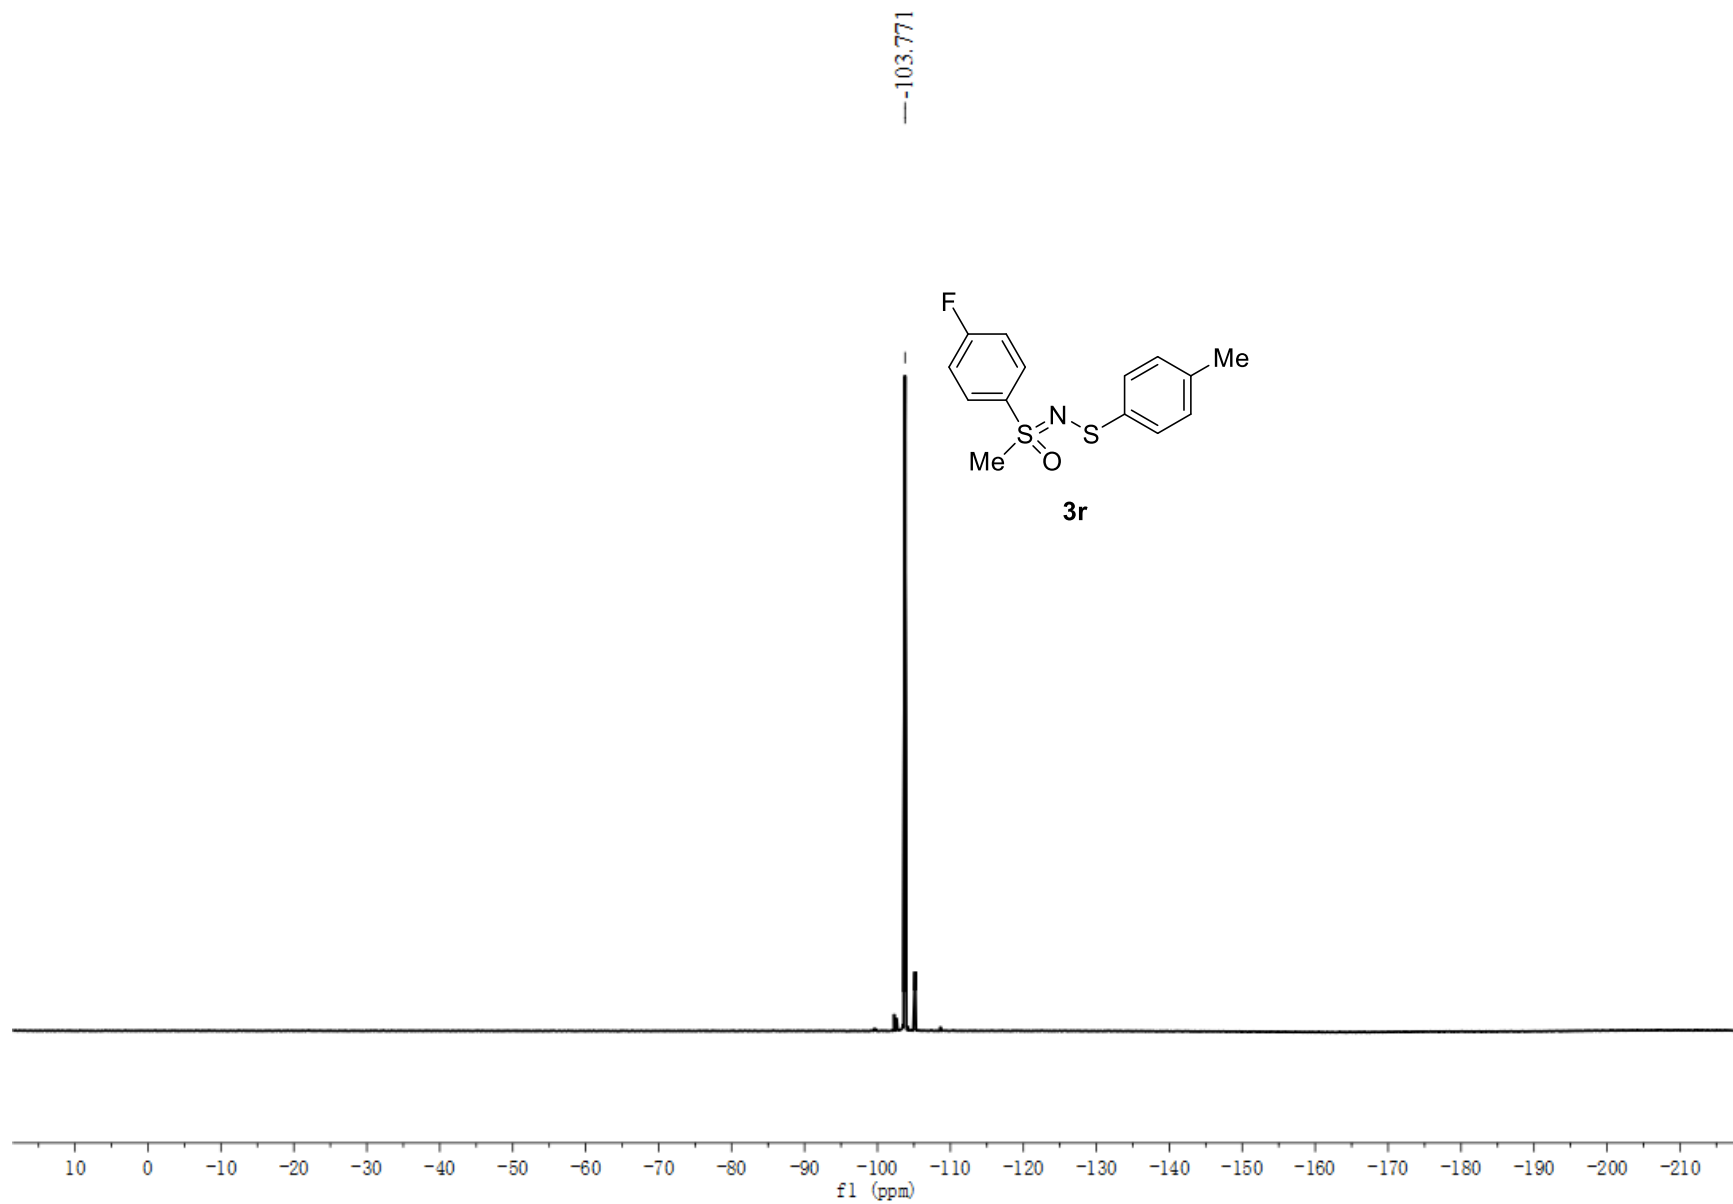

$^1\text{H}$  NMR spectra of compound **3s** (400 MHz,  $\text{CDCl}_3$ )

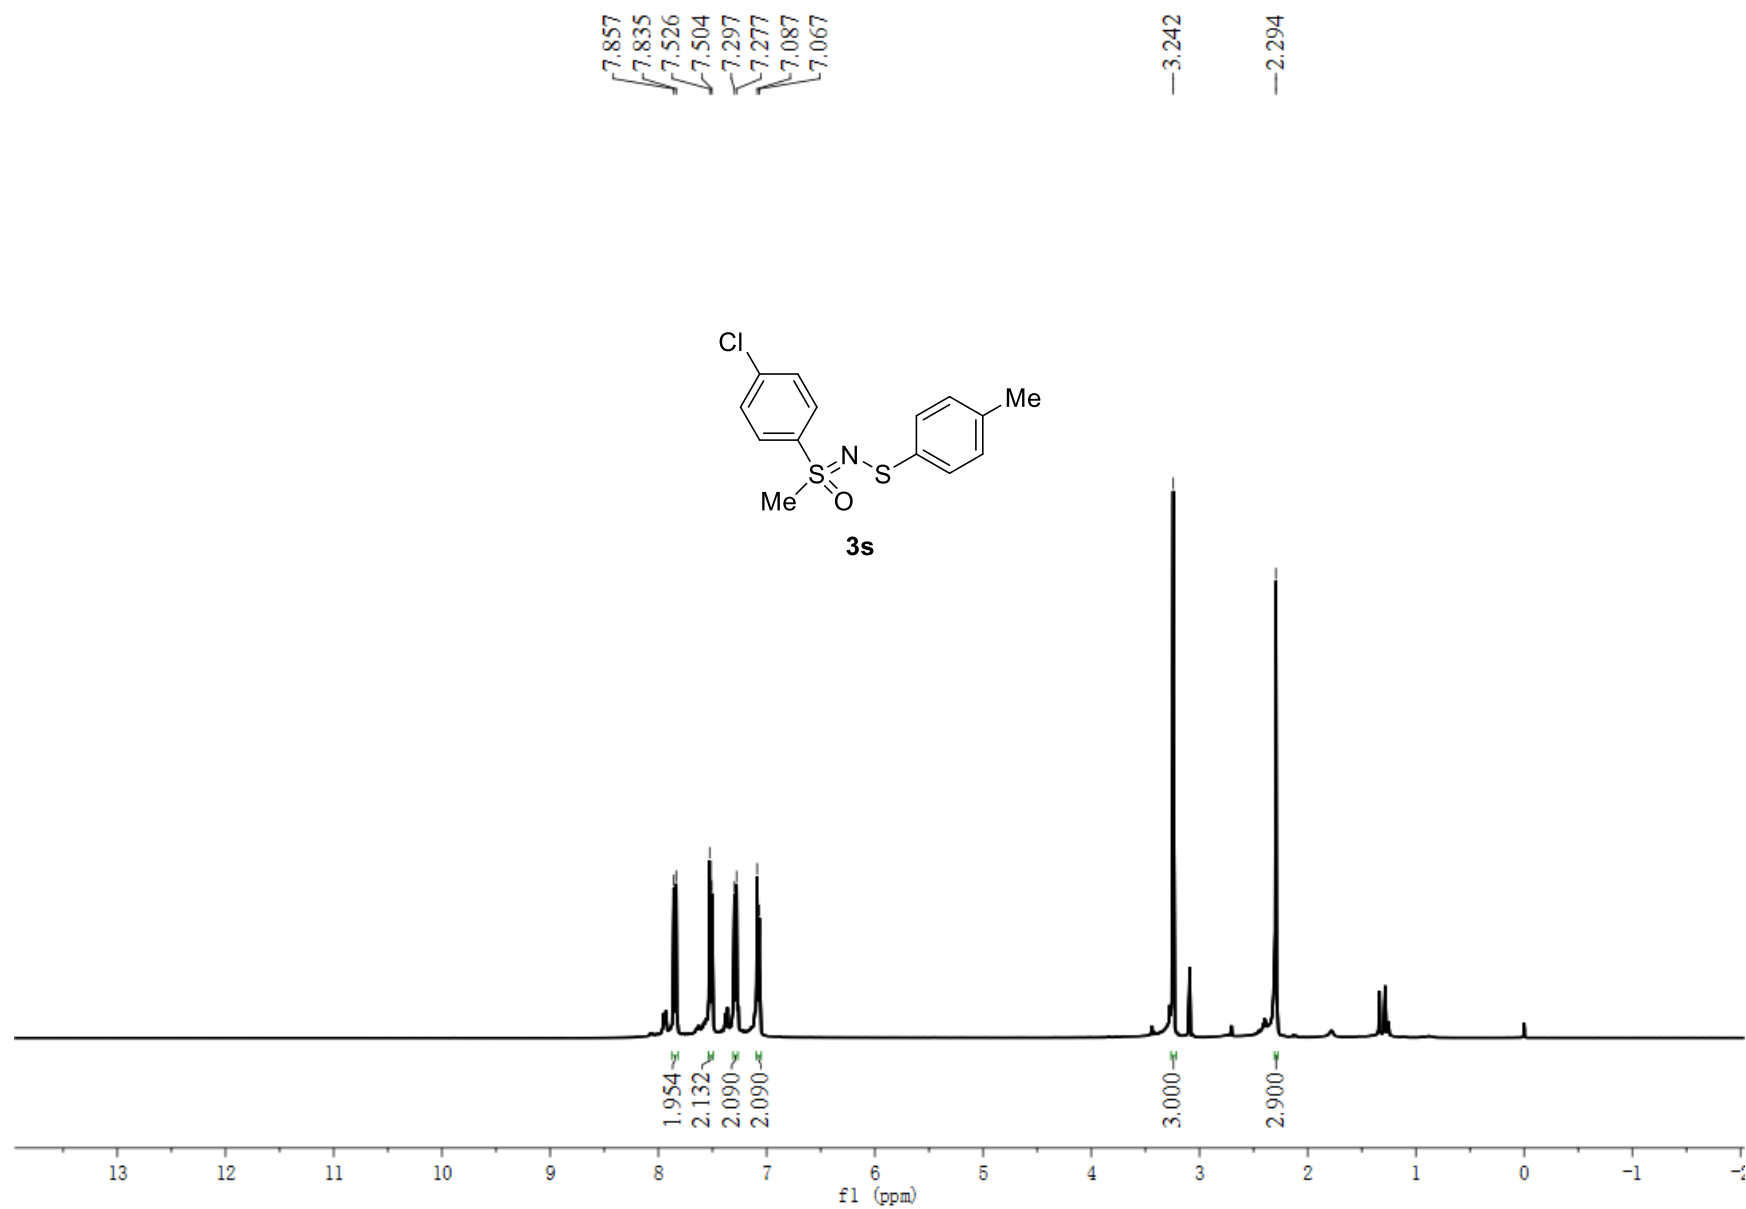

<sup>13</sup>C NMR spectra of compound **3s** (101 MHz, CDCl<sub>3</sub>)

140.452  
137.917  
137.304  
135.547  
129.985  
129.770  
129.379  
125.271

—43.844

—21.044

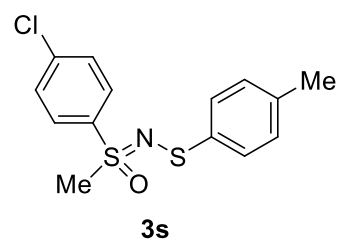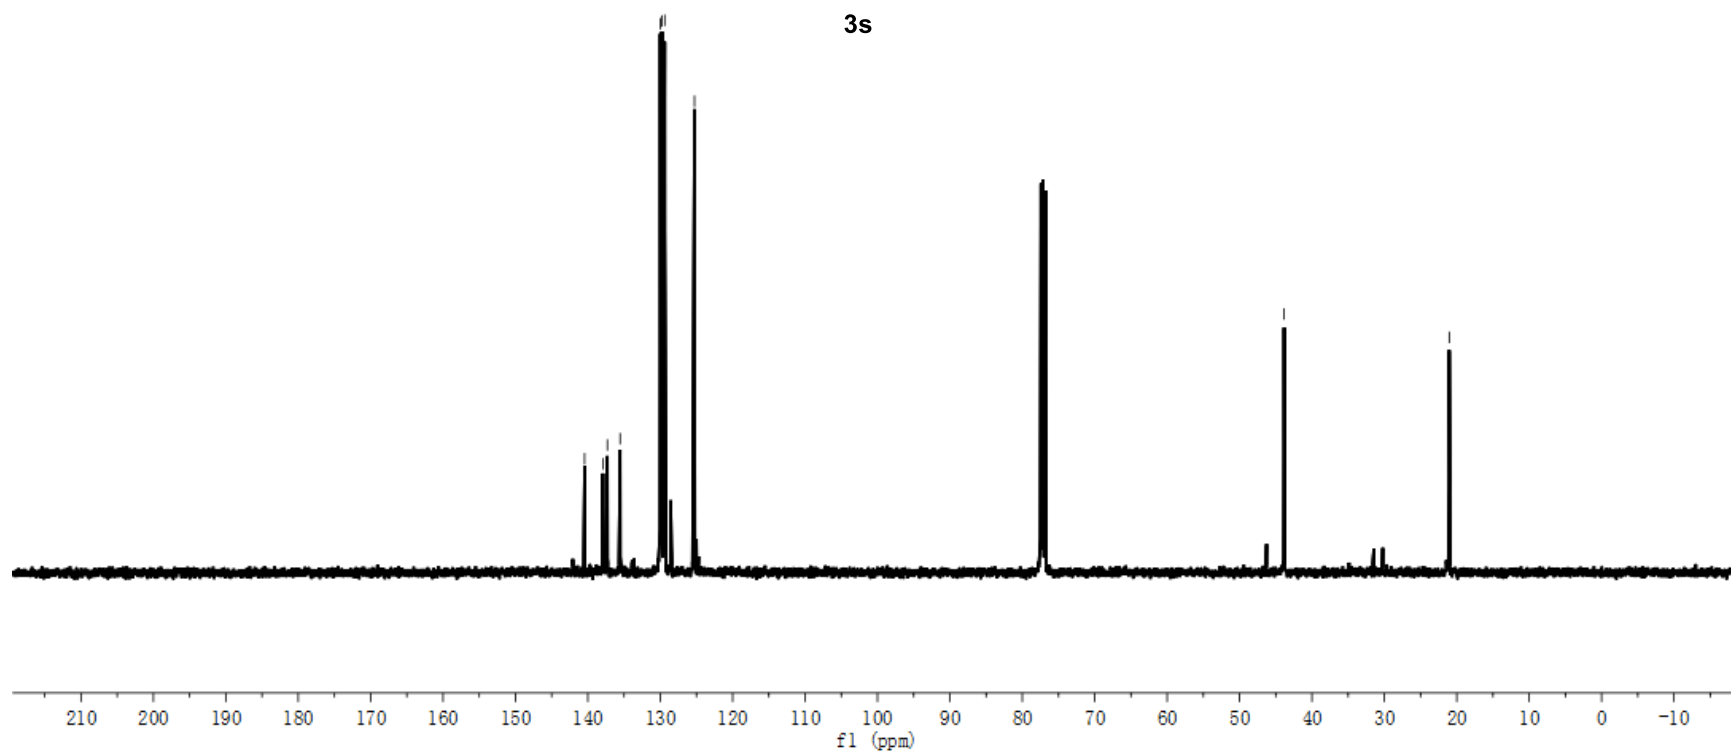

$^1\text{H}$  NMR spectra of compound **3t** (400 MHz,  $\text{CDCl}_3$ )

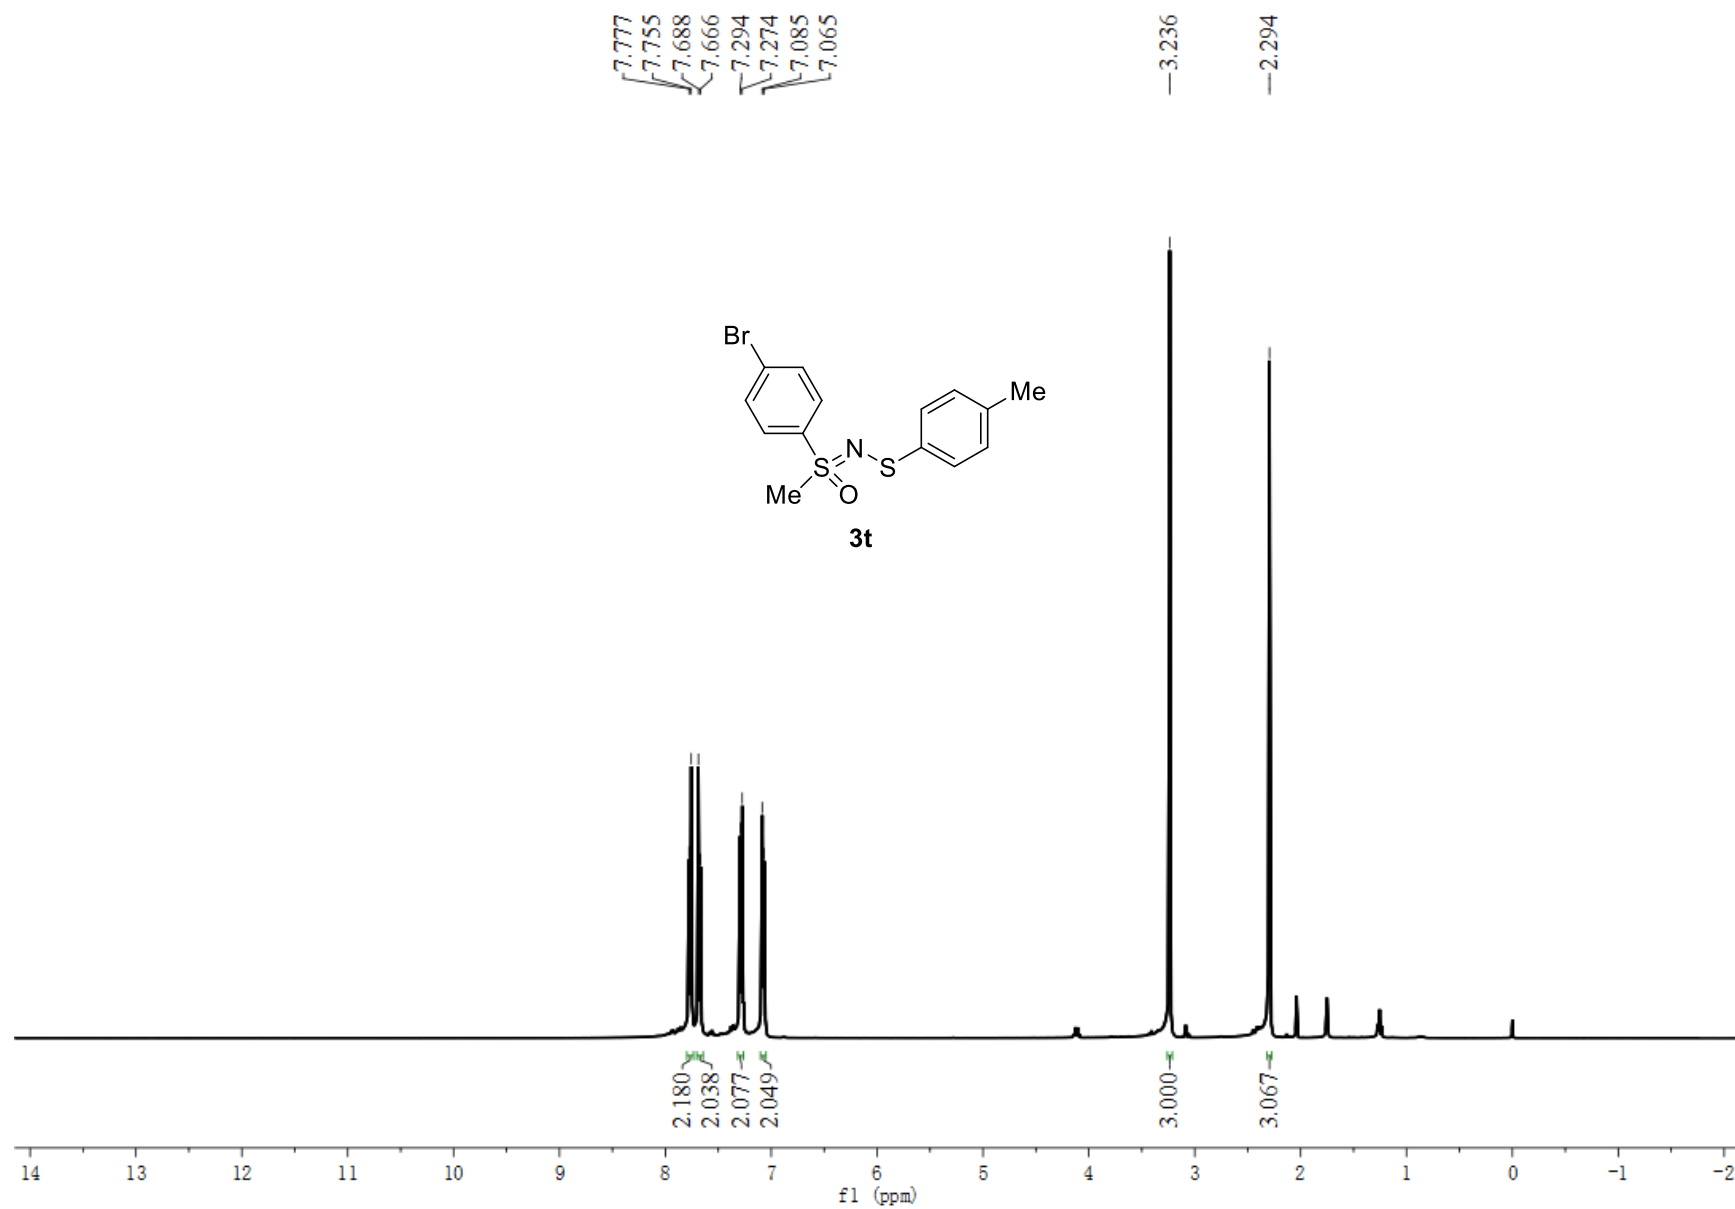

$^{13}\text{C}$  NMR spectra of compound **3t** (101 MHz,  $\text{CDCl}_3$ )

137.887  
135.568  
132.761  
130.058  
129.386  
129.036  
125.302

—43.815

—21.058

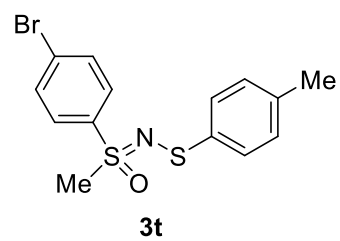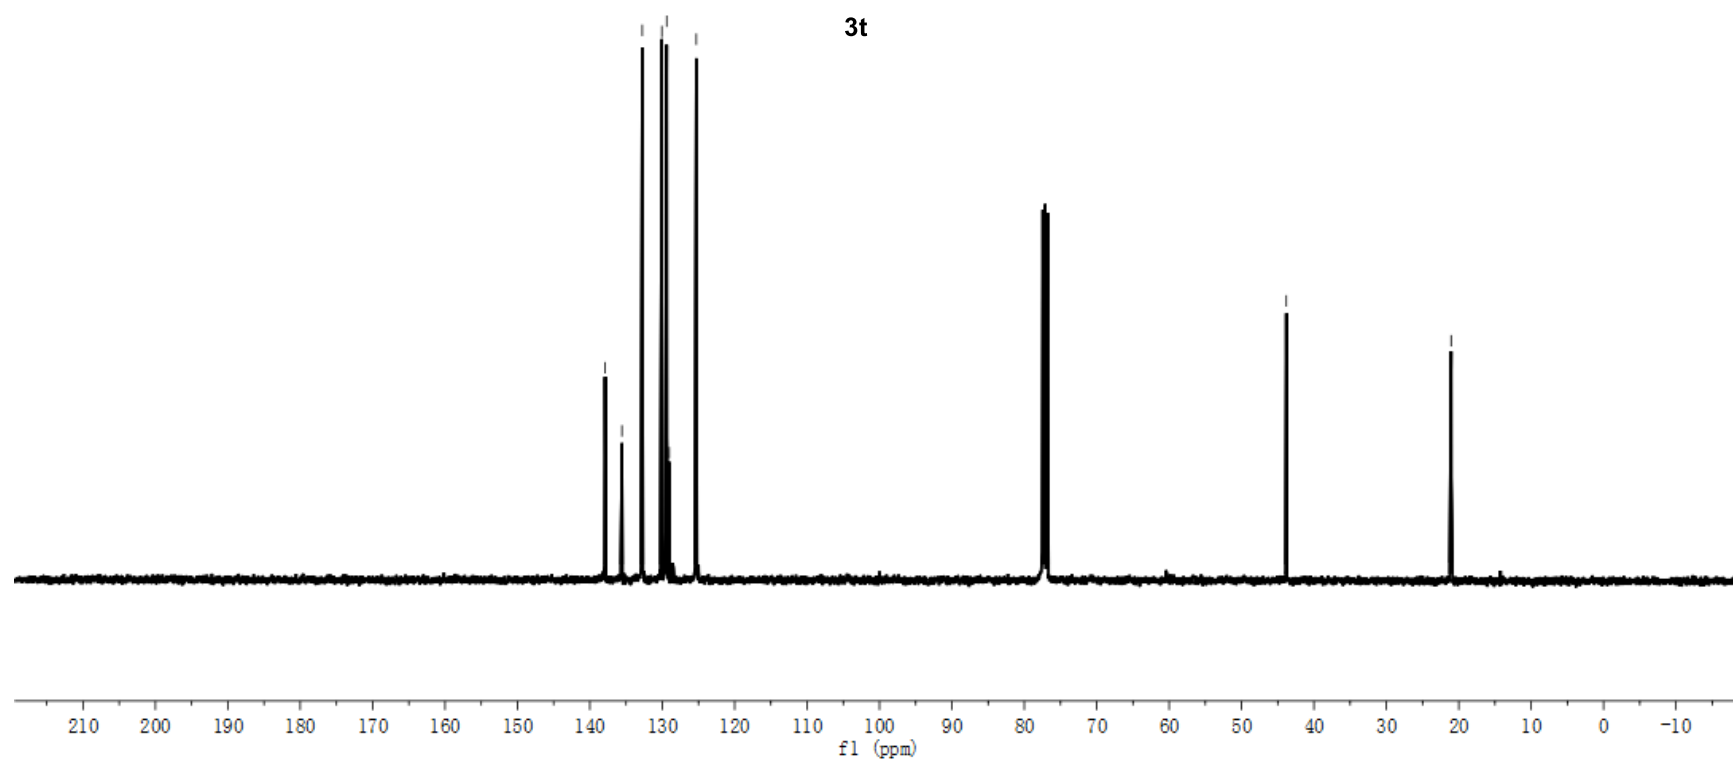

<sup>1</sup>H NMR spectra of compound **3u** (400 MHz, CDCl<sub>3</sub>)

7.509  
7.491  
7.474  
7.454  
7.434  
7.401  
7.314  
7.297  
7.161  
7.141  
7.083  
7.065

—3.816

—3.243

—2.288

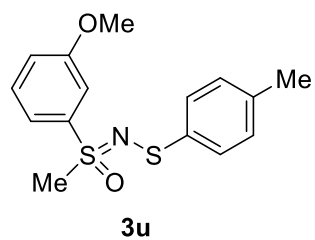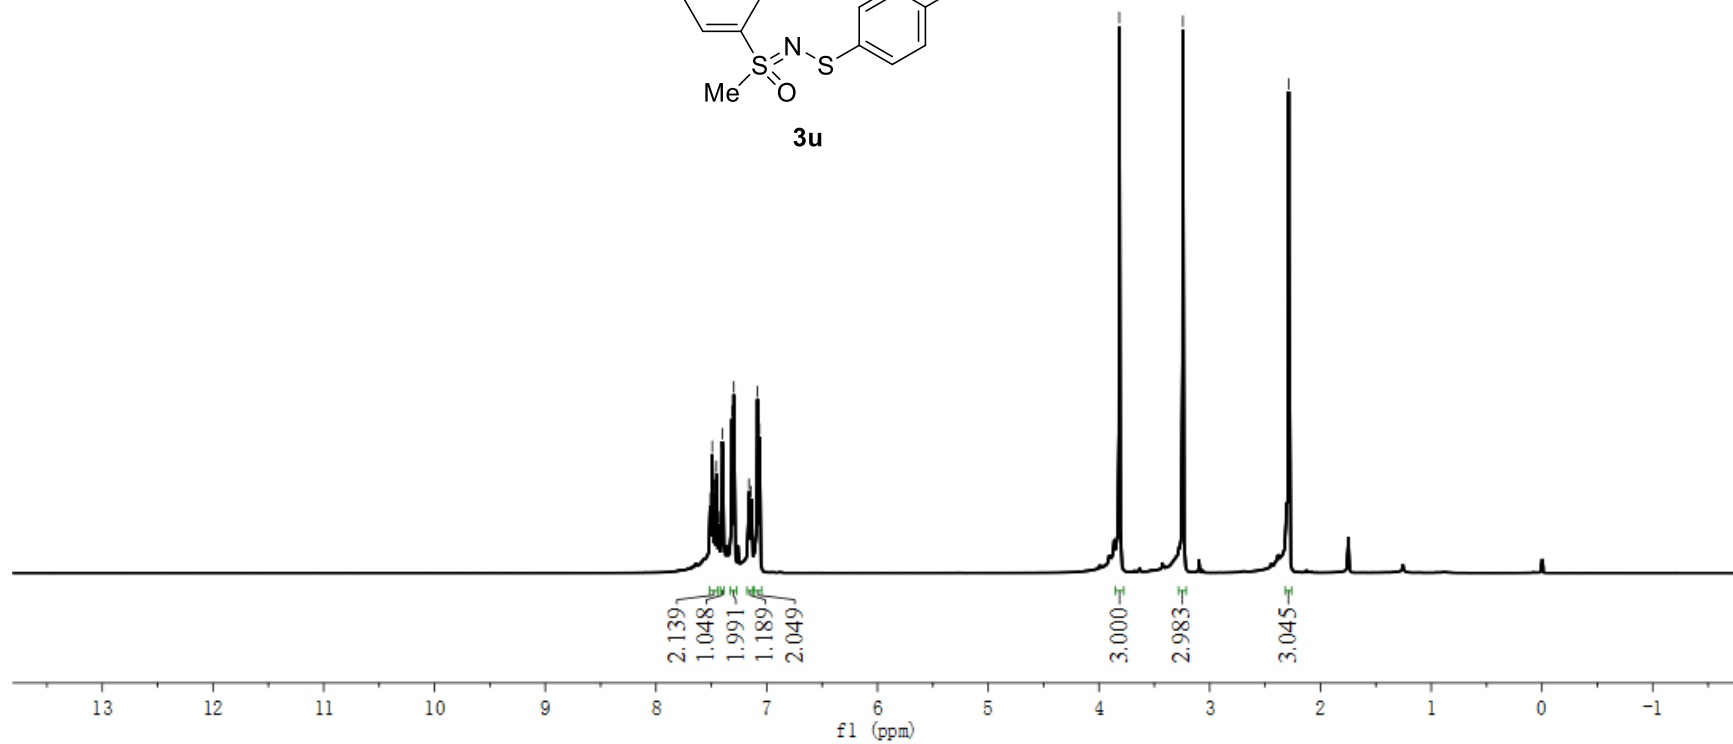

$^{13}\text{C}$  NMR spectra of compound **3u** (101 MHz,  $\text{CDCl}_3$ )

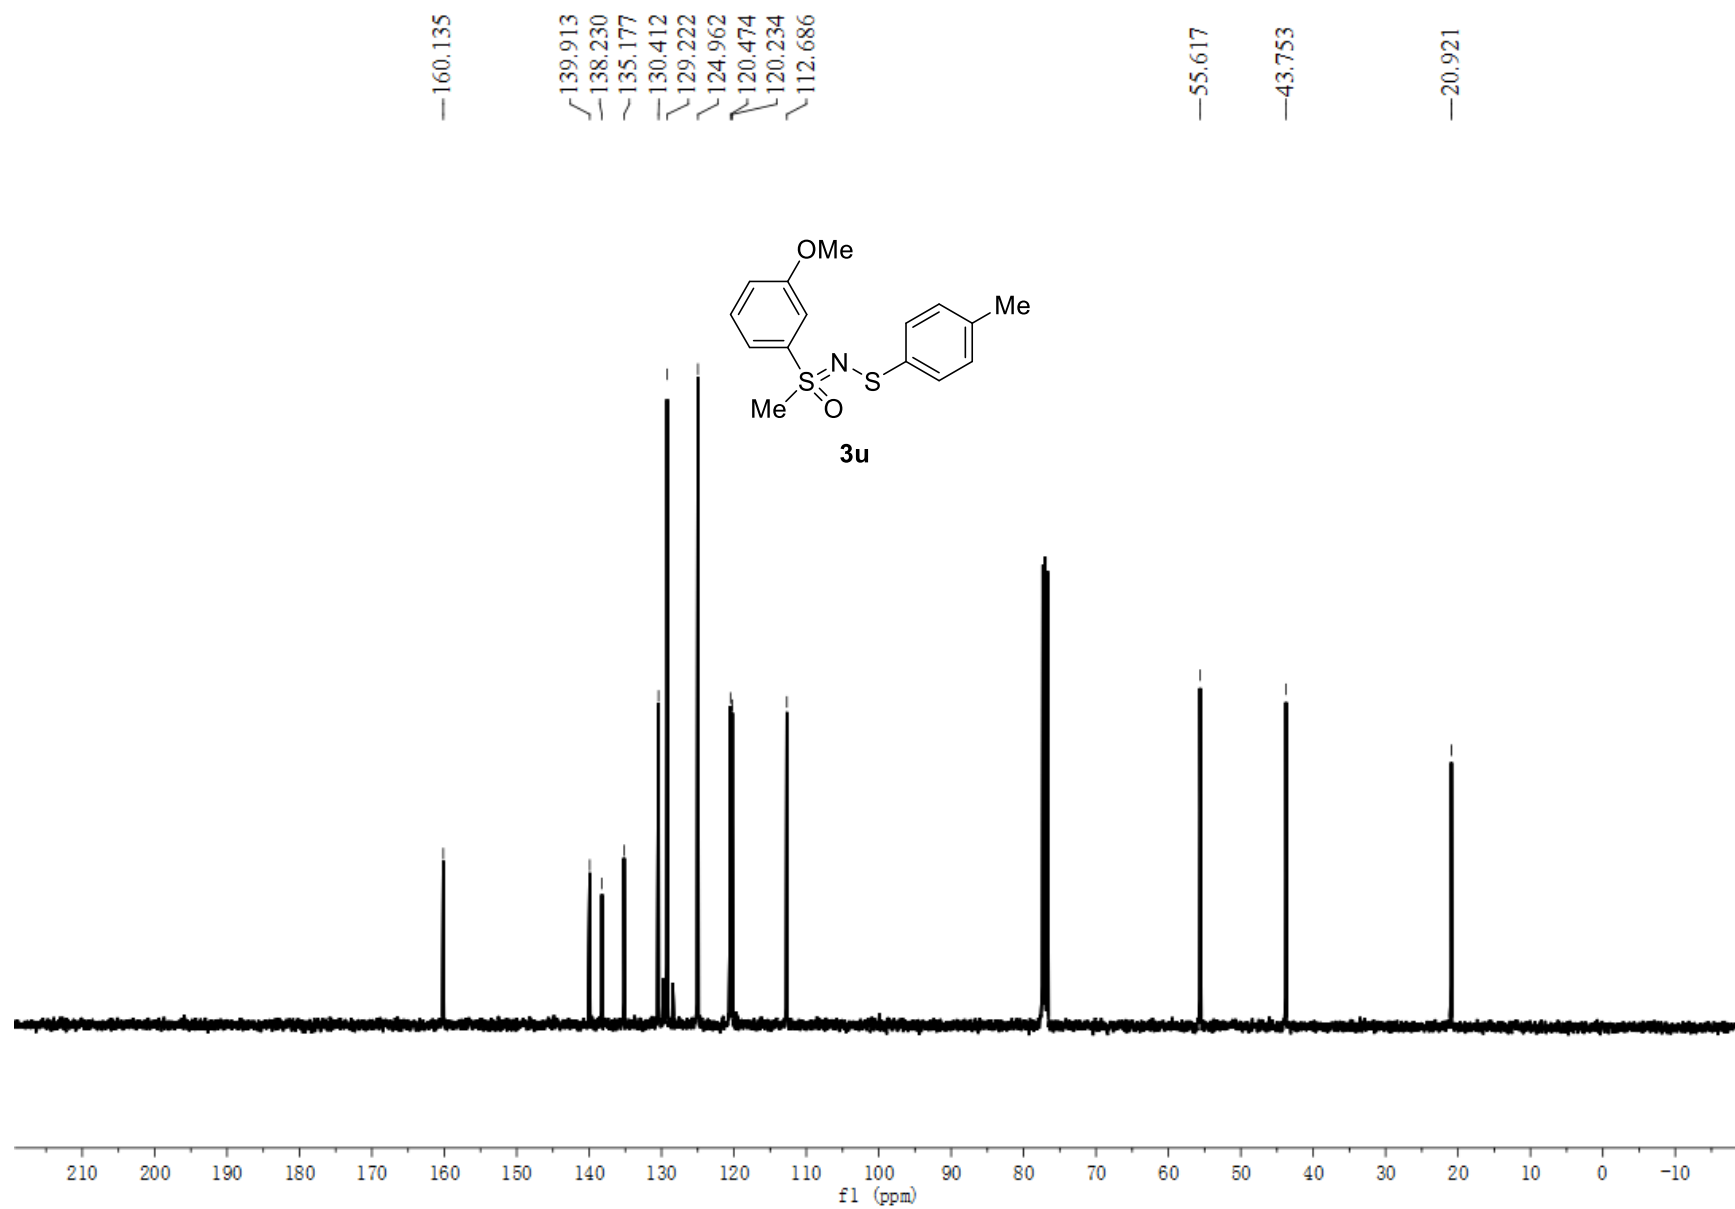

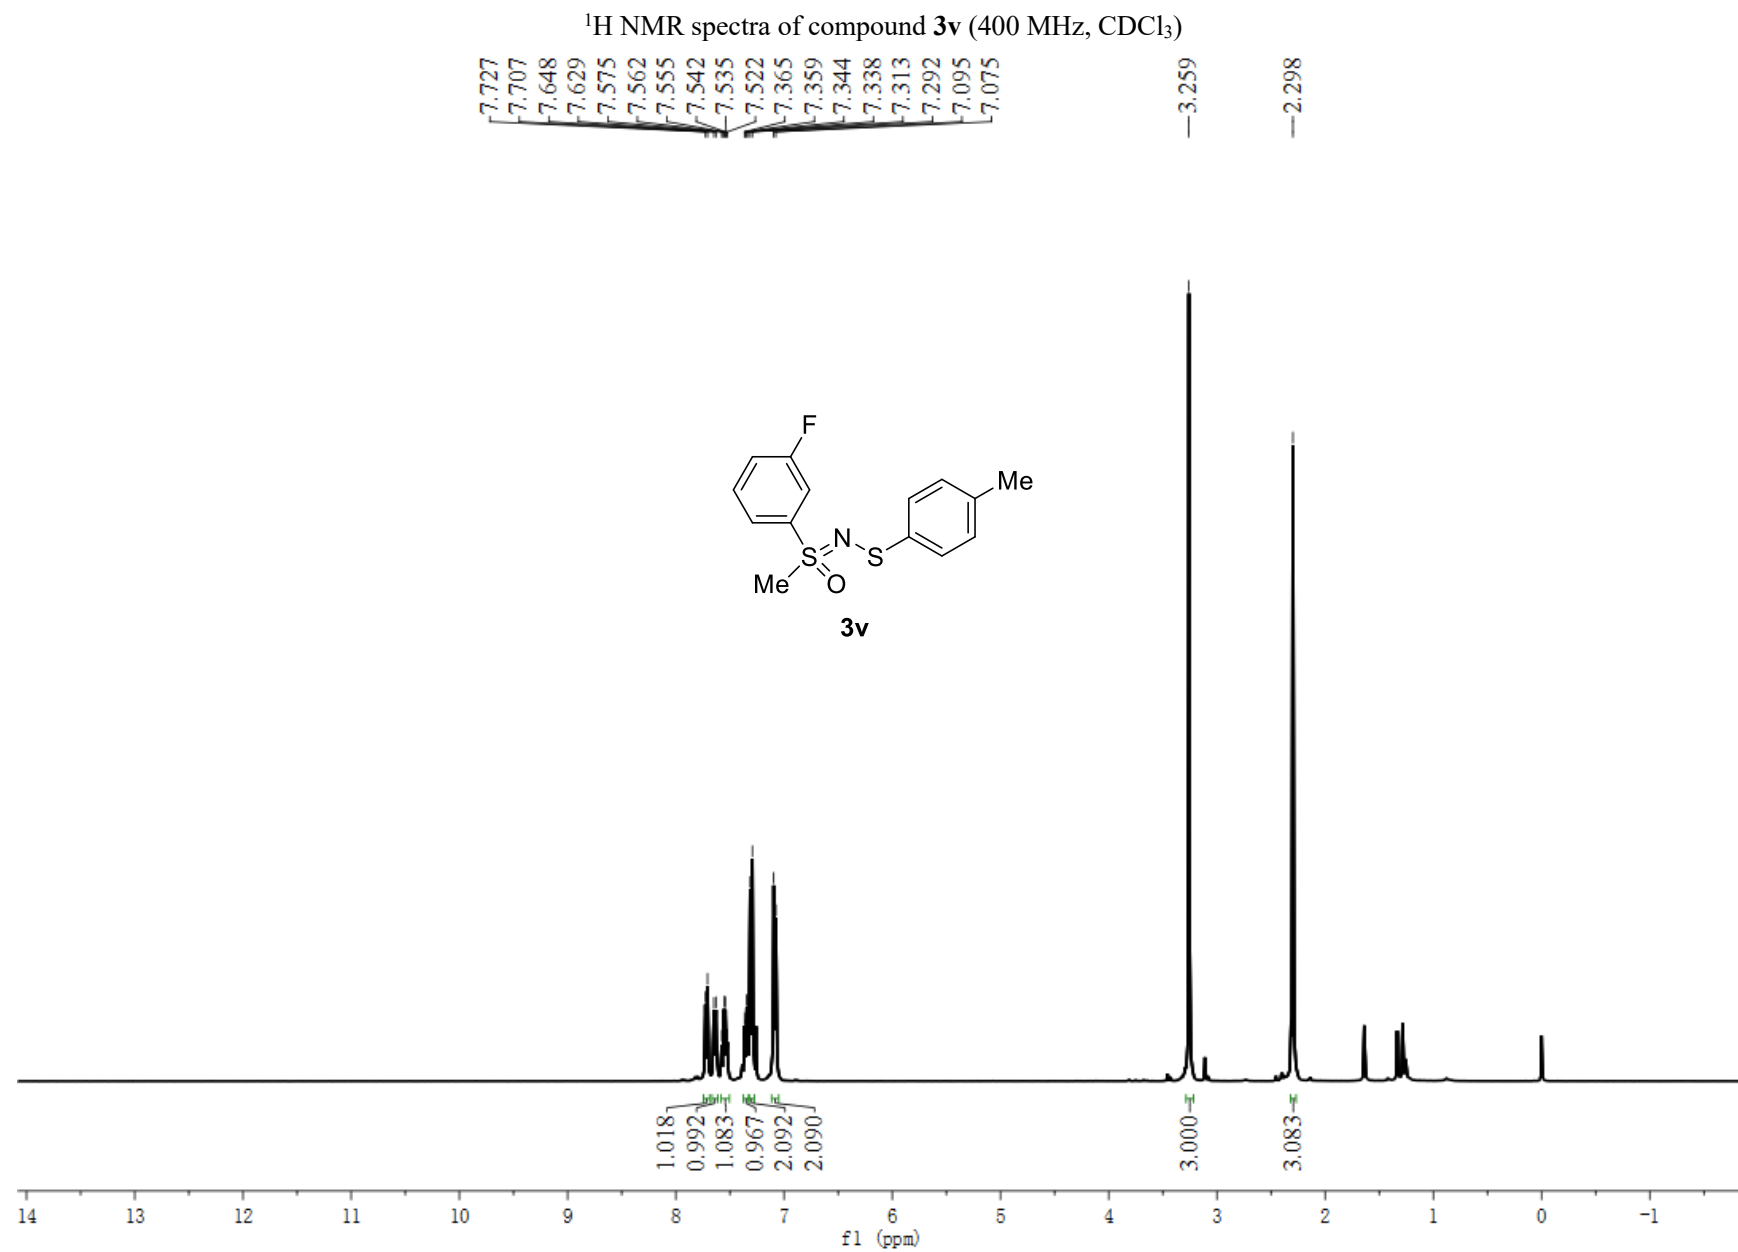

$^{13}\text{C}$  NMR spectra of compound **3v** (101 MHz,  $\text{CDCl}_3$ )

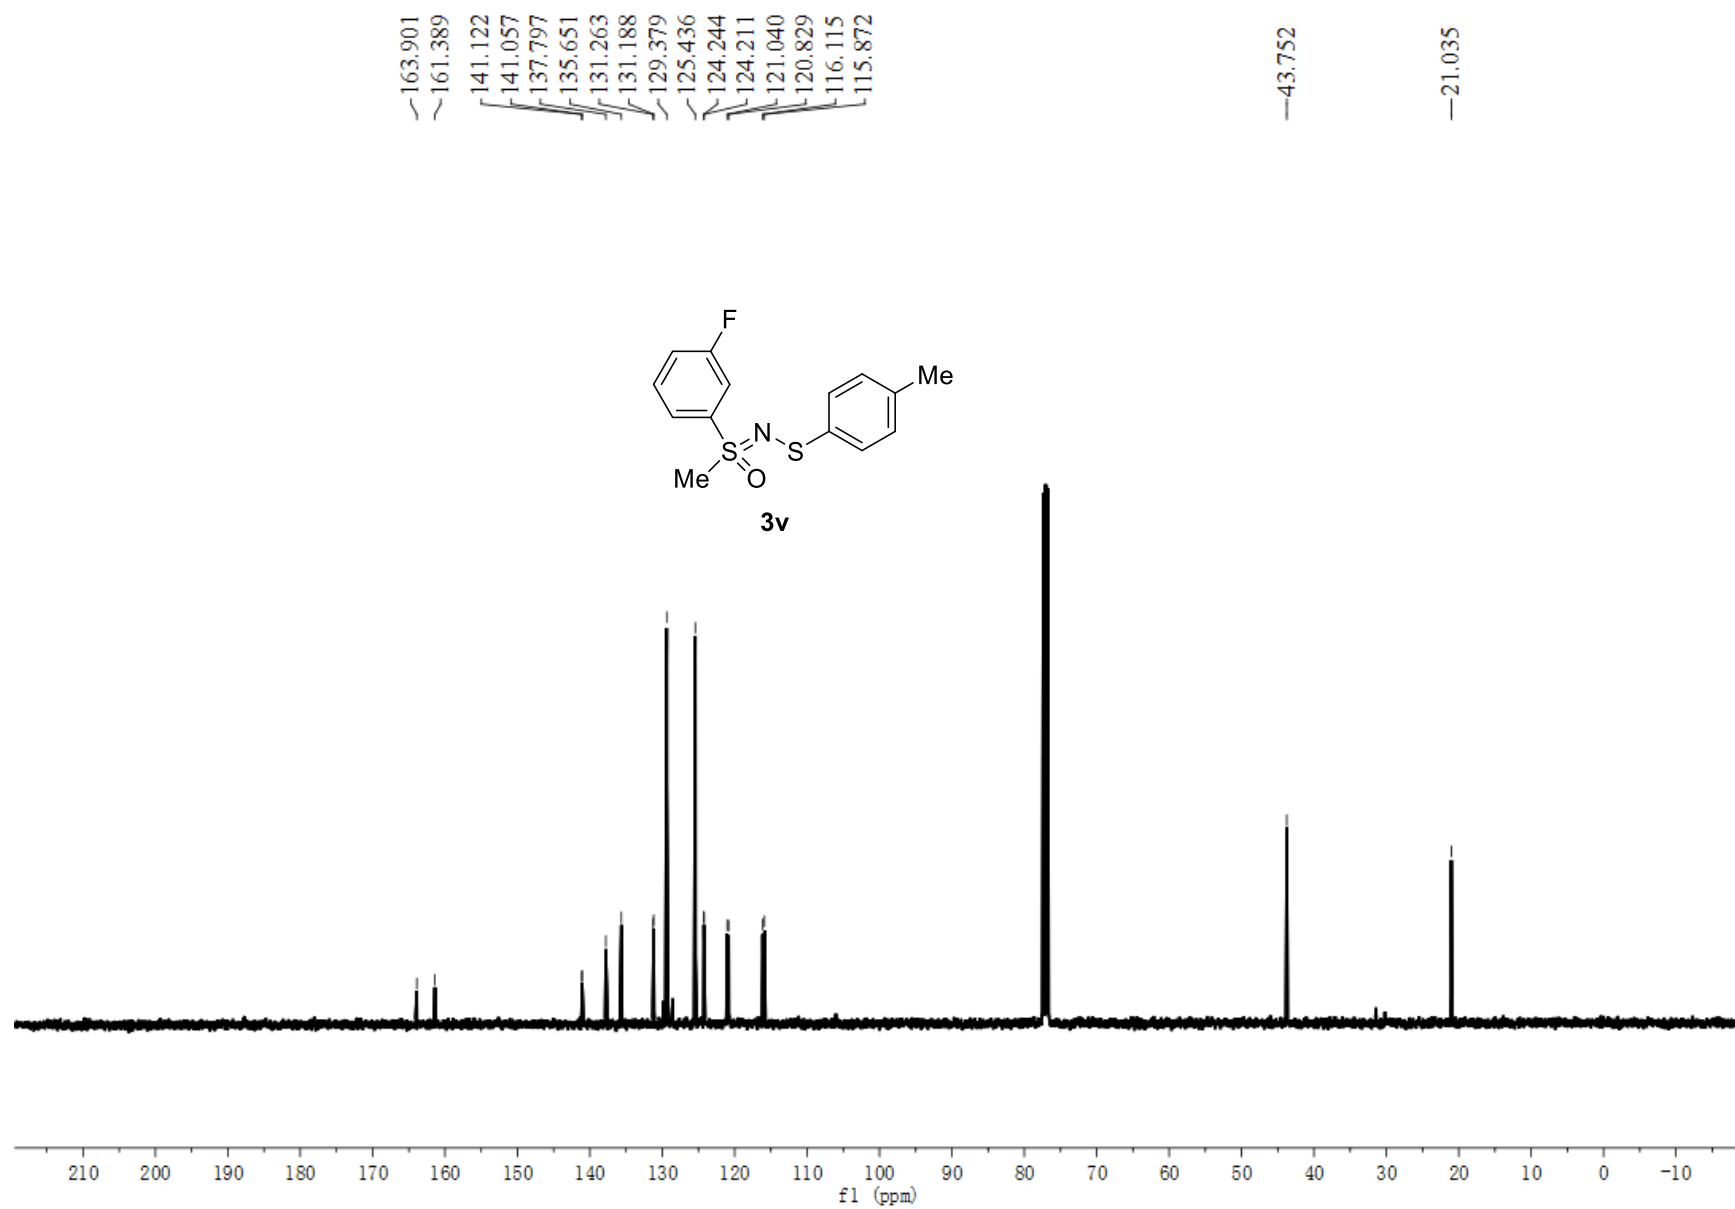

$^{19}\text{F}$  NMR spectra of compound **3v** (376 MHz,  $\text{CDCl}_3$ )

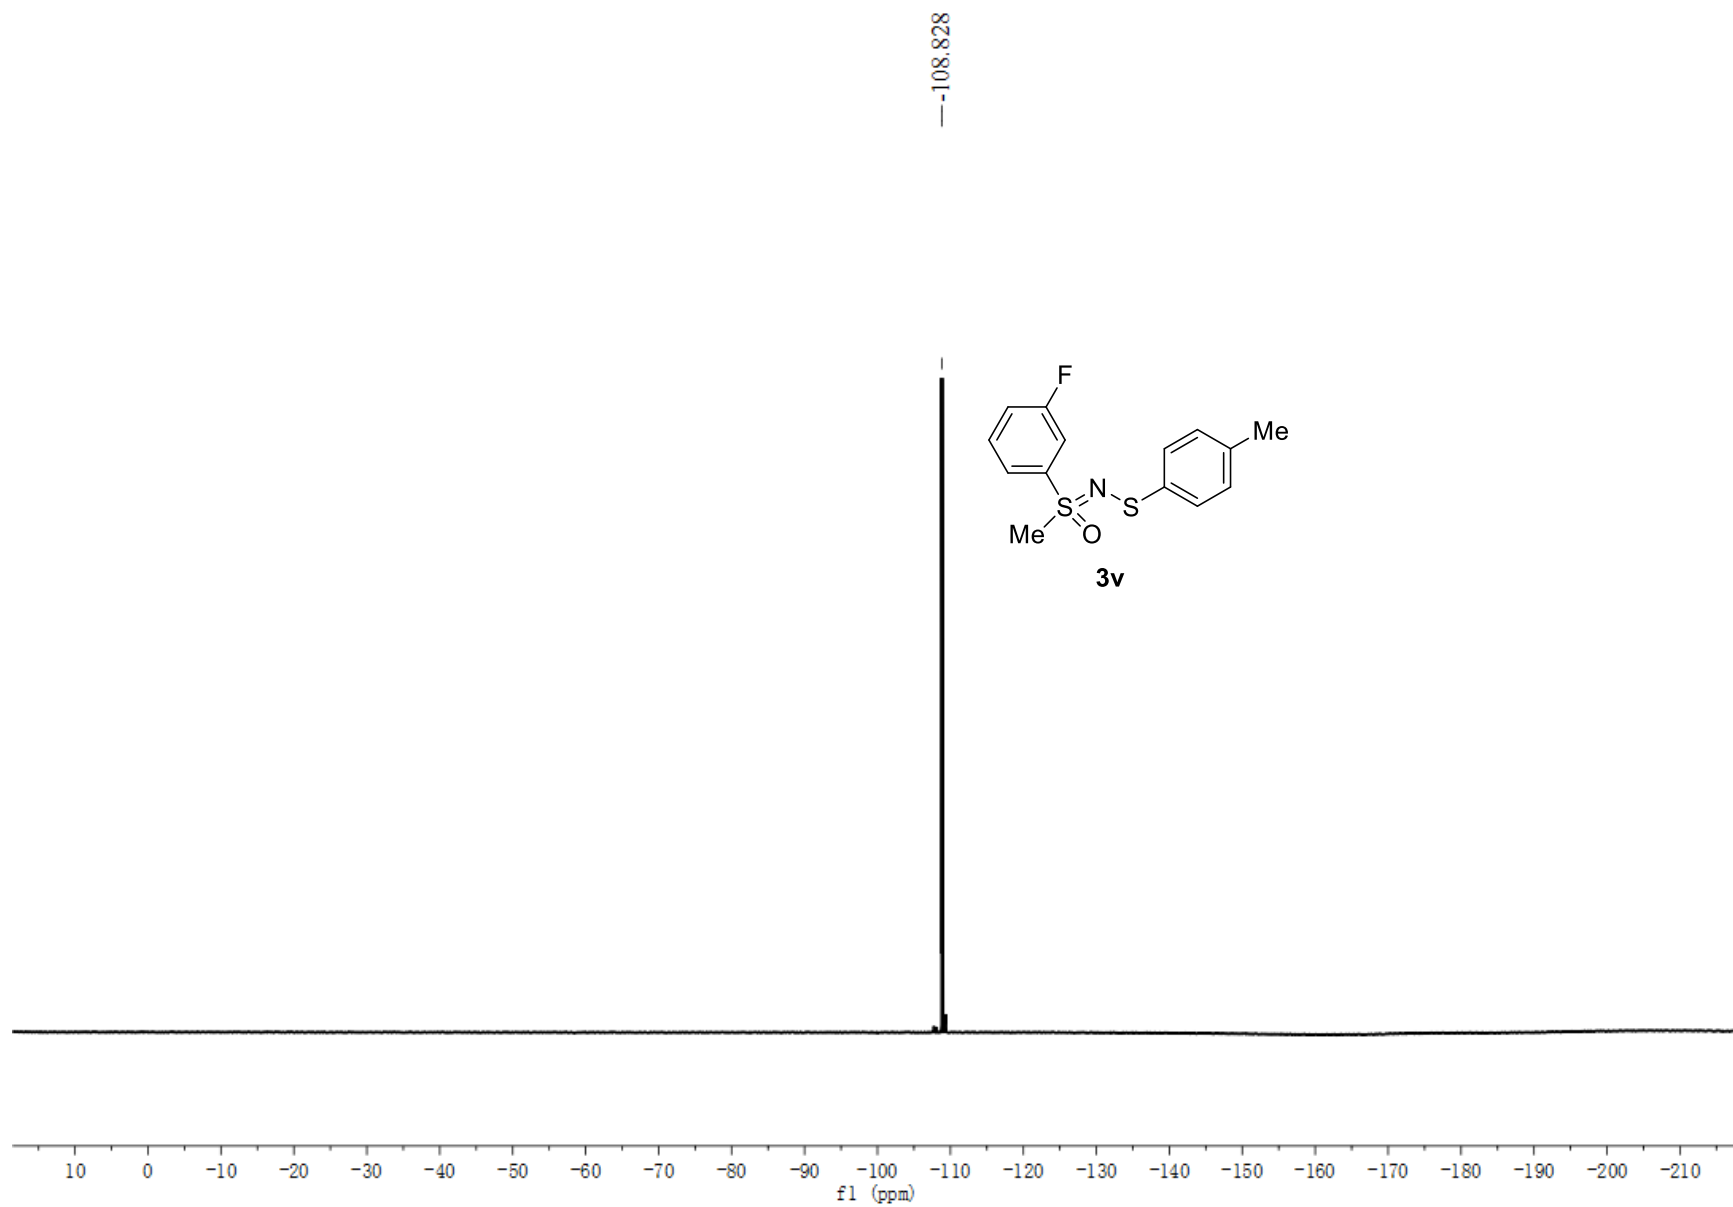

<sup>1</sup>H NMR spectra of compound **3w** (400 MHz, CDCl<sub>3</sub>)

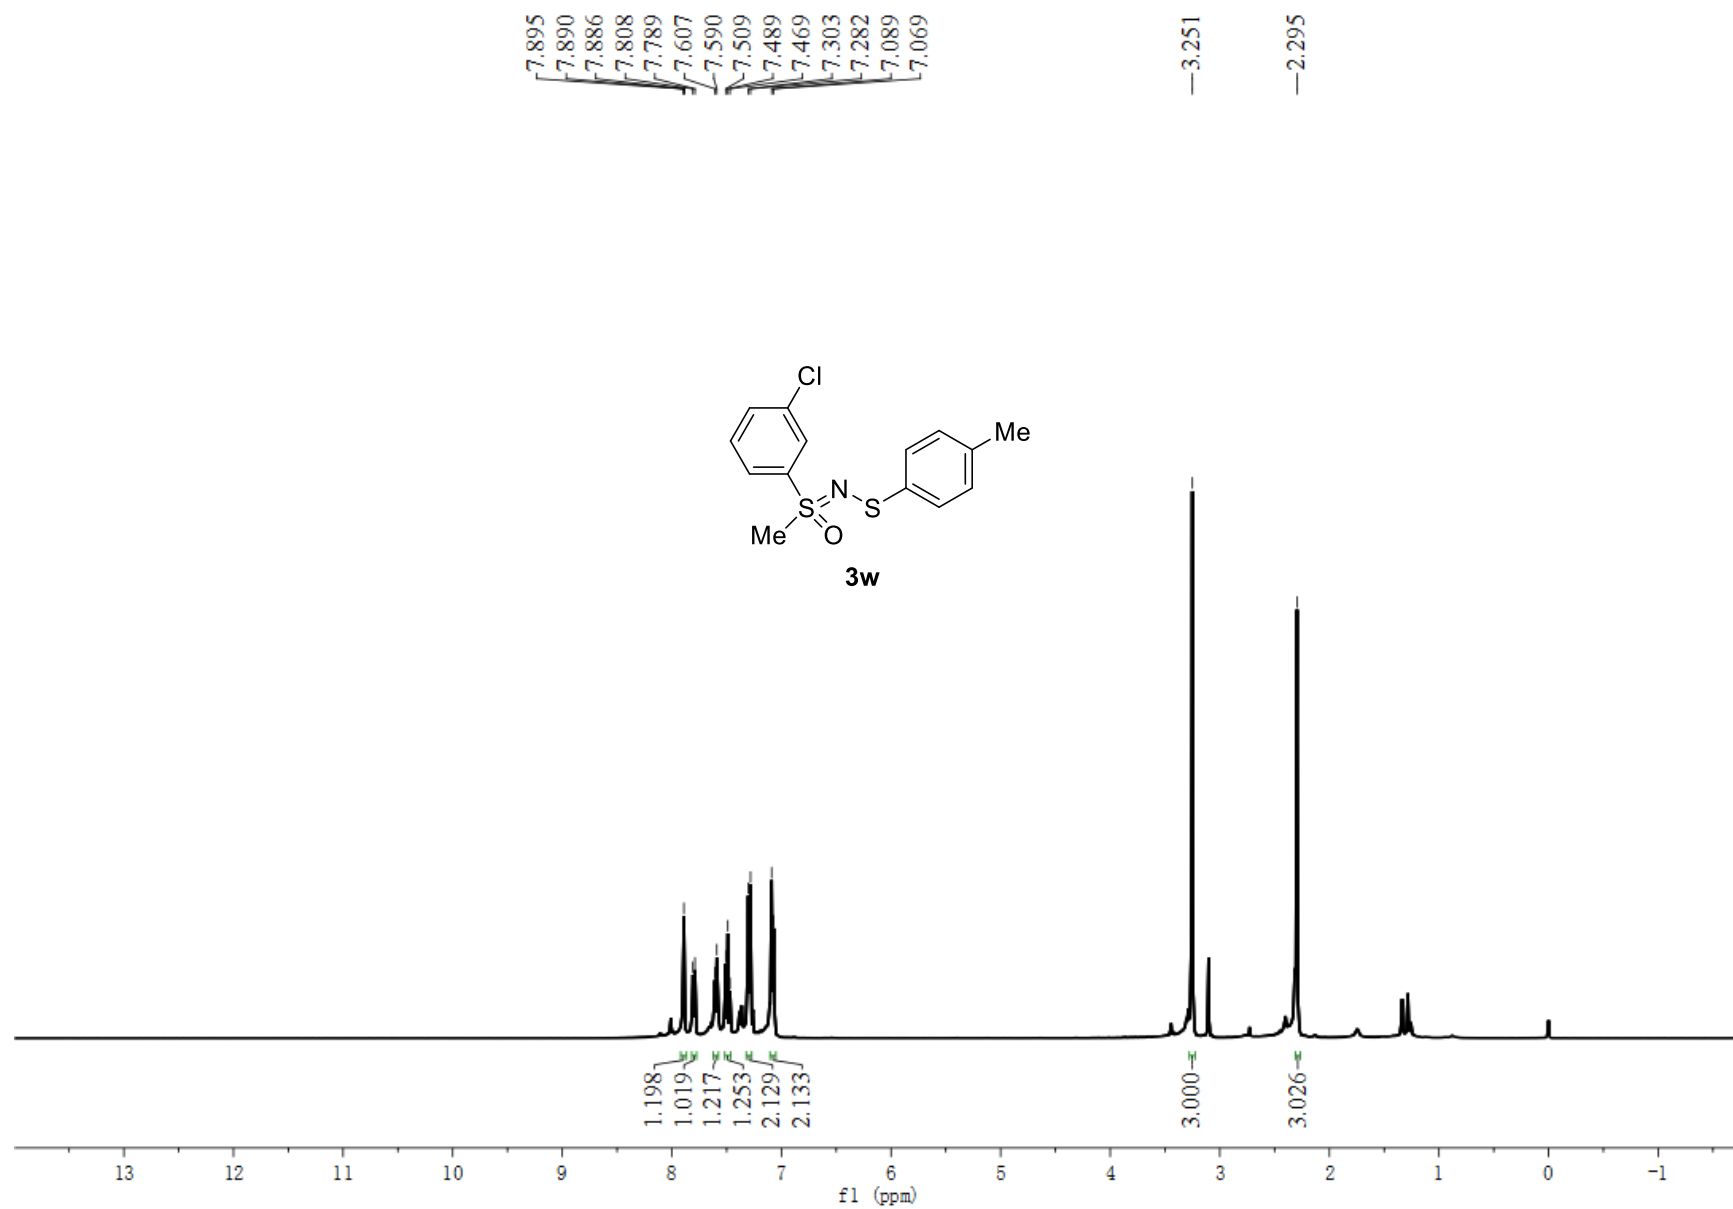

<sup>13</sup>C NMR spectra of compound **3w** (101 MHz, CDCl<sub>3</sub>)

140.682  
137.720  
135.728  
135.713  
133.785  
130.686  
129.388  
128.639  
126.585  
125.564

—43.789

—21.050

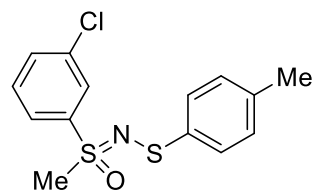

**3w**

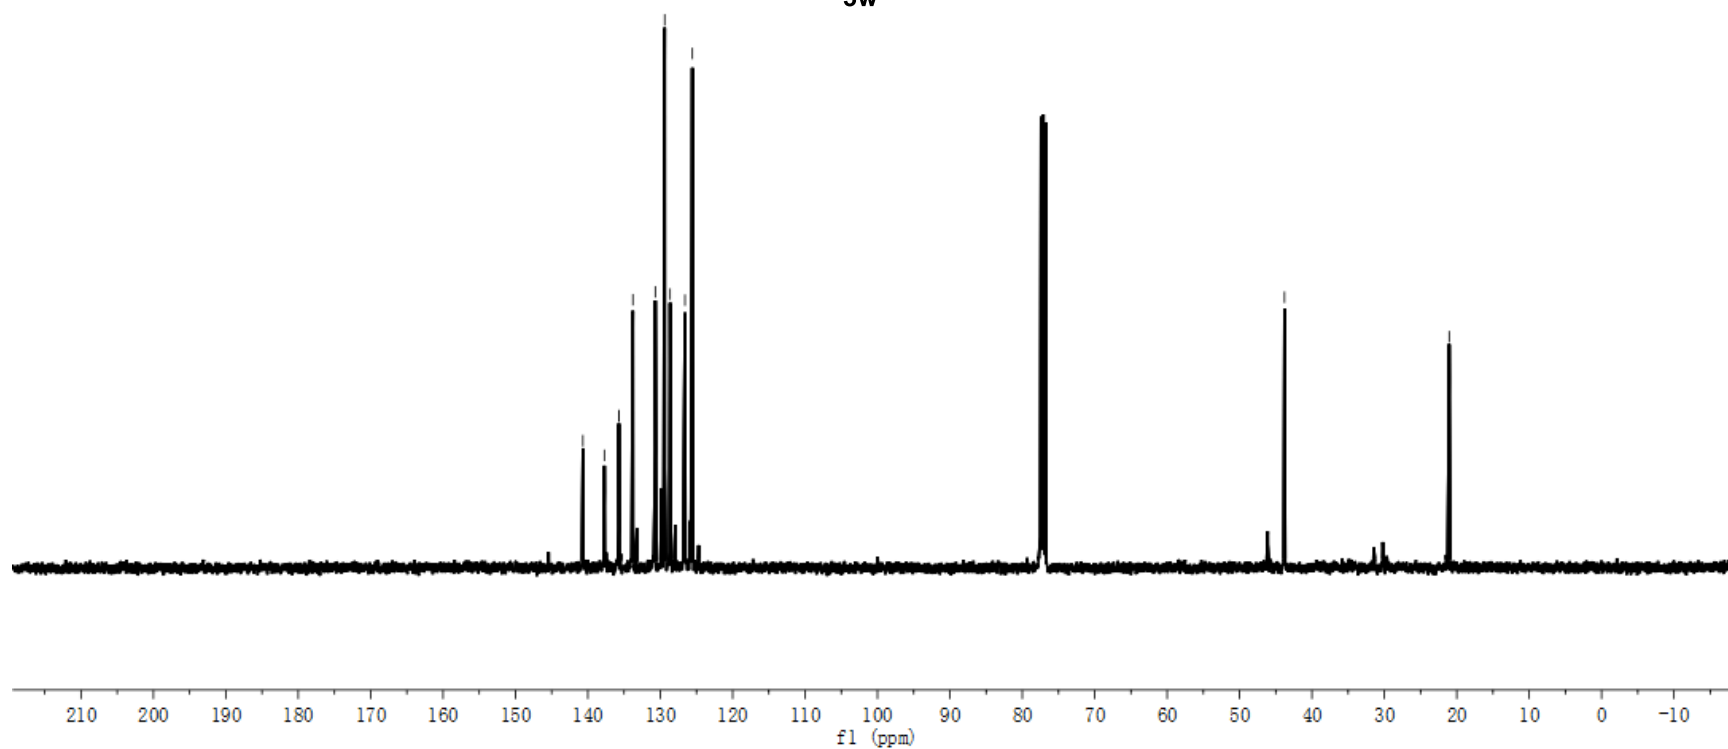

$^1\text{H}$  NMR spectra of compound **3x** (400 MHz,  $\text{CDCl}_3$ )

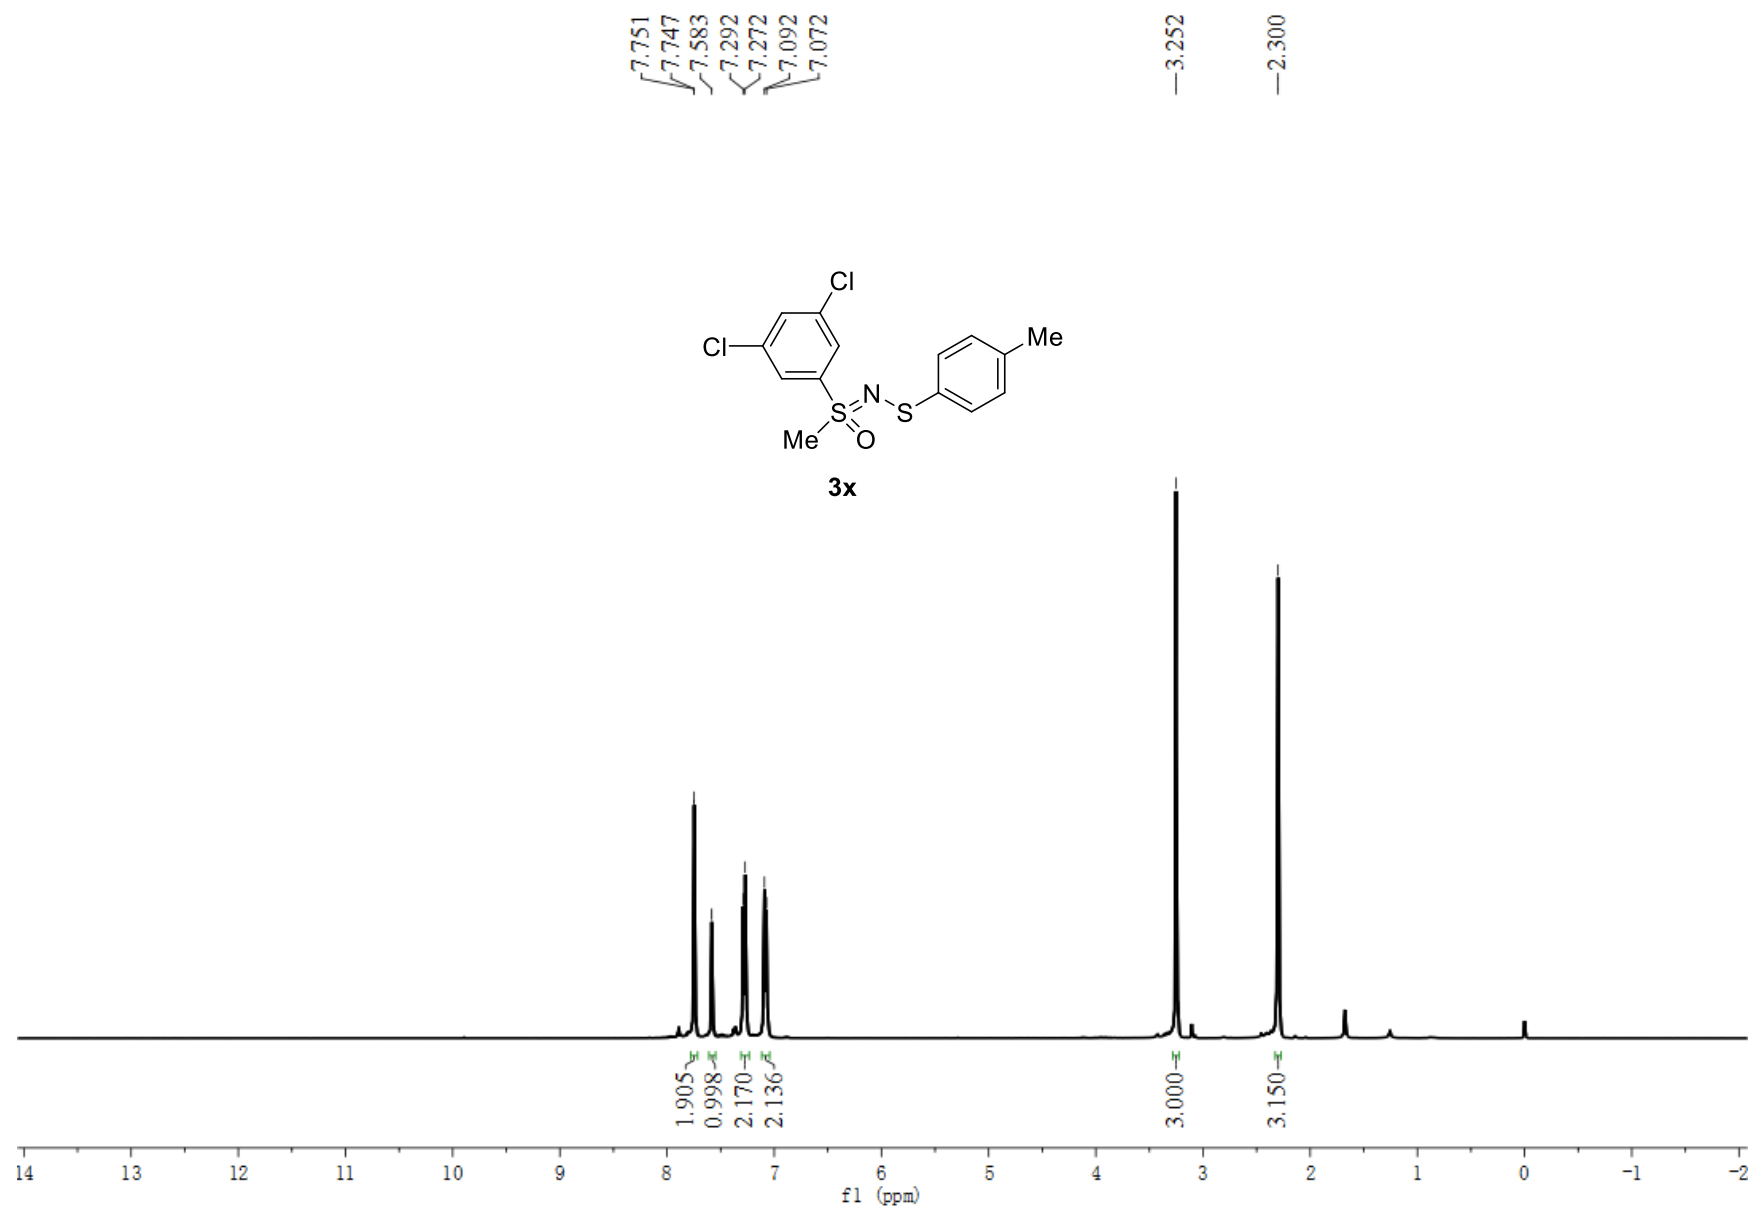

$^{13}\text{C}$  NMR spectra of compound **3x** (101 MHz,  $\text{CDCl}_3$ )

141.986  
137.123  
136.394  
136.188  
133.592  
129.441  
126.953  
126.204

—43.820

—21.072

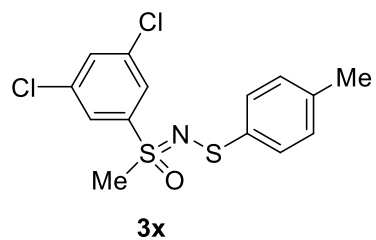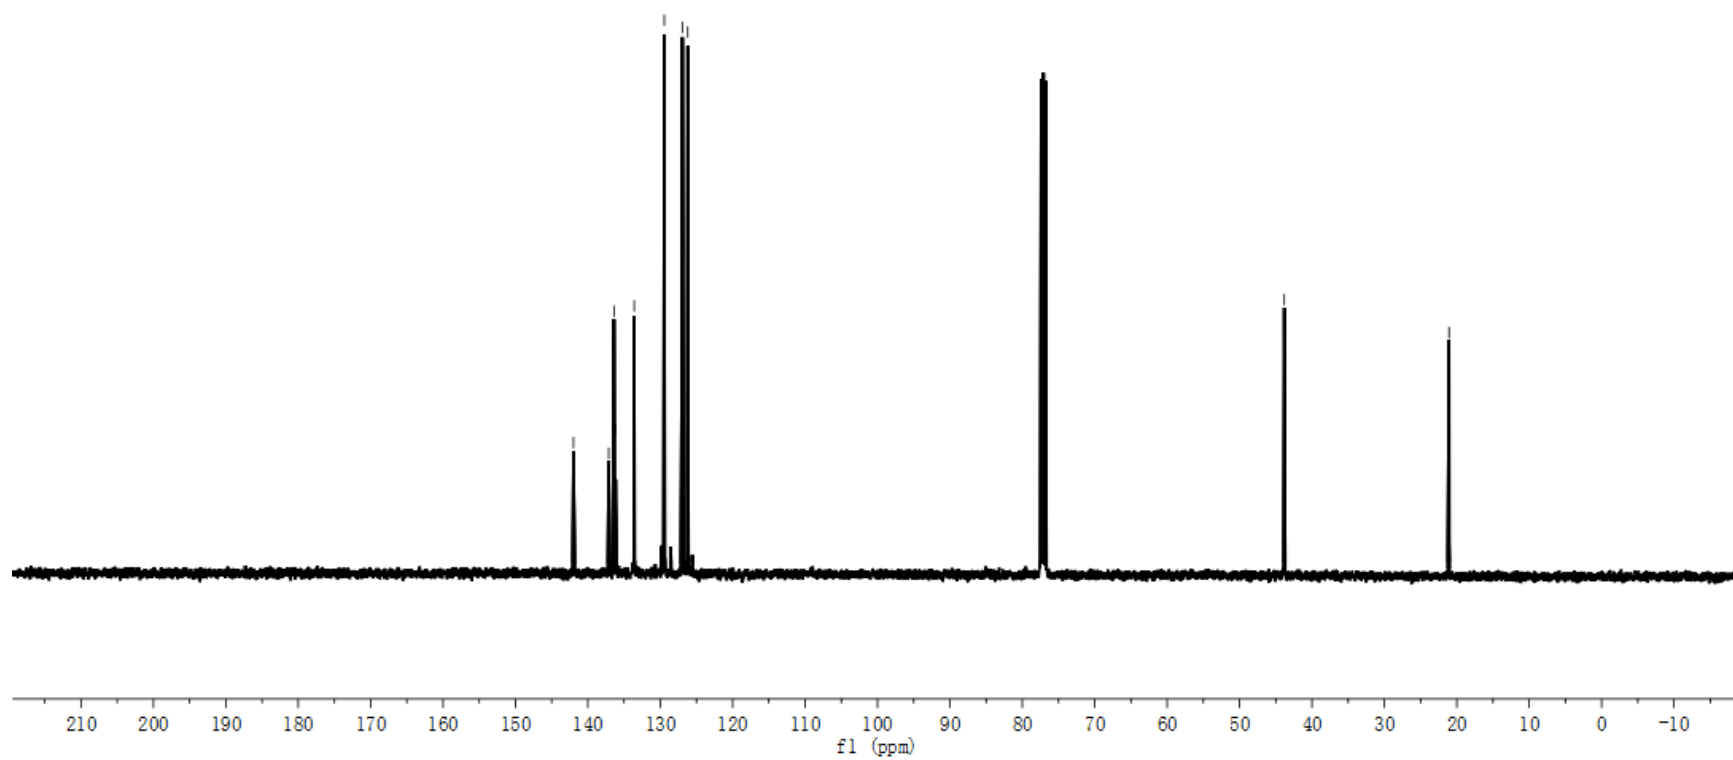

<sup>1</sup>H NMR spectra of compound **3y** (400 MHz, CDCl<sub>3</sub>)

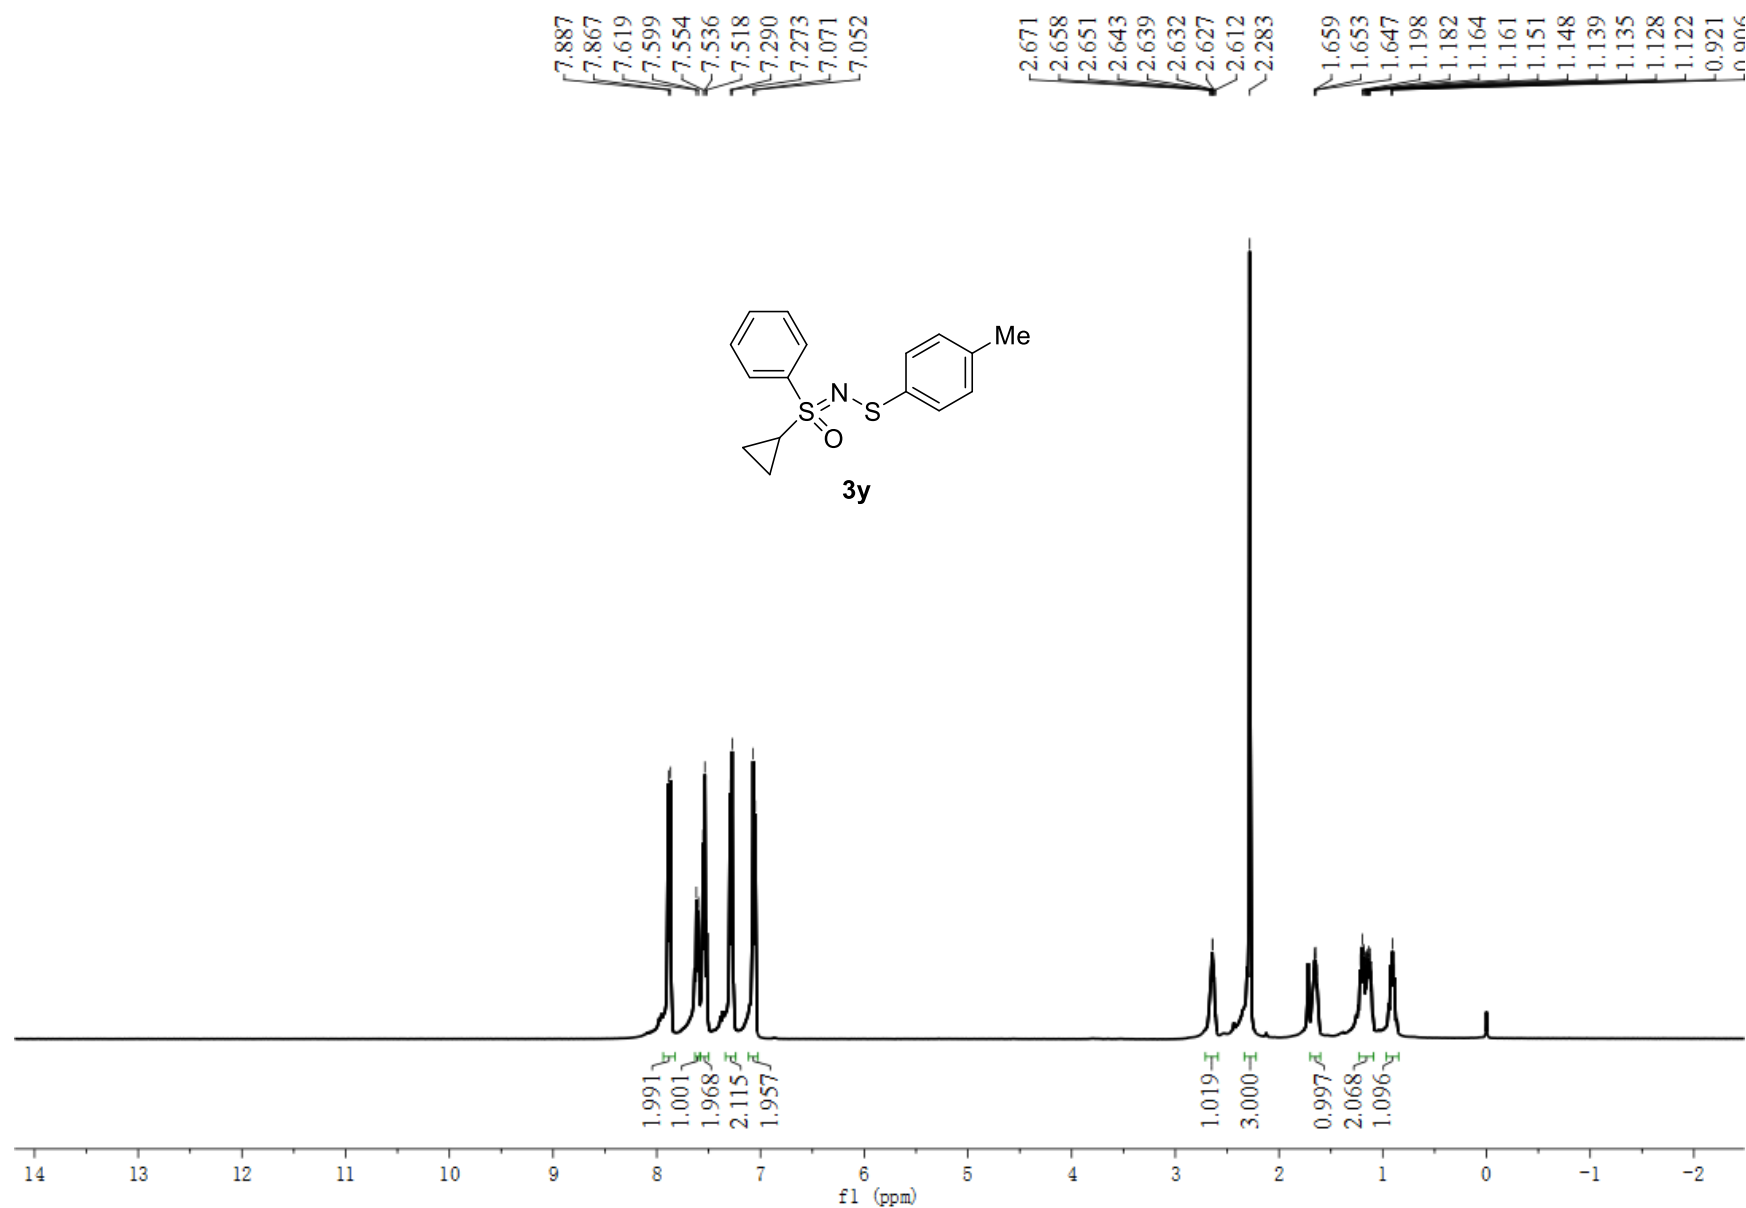

$^{13}\text{C}$  NMR spectra of compound **3y** (101 MHz,  $\text{CDCl}_3$ )

139.240  
138.800  
134.985  
133.273  
129.328  
129.242  
128.469  
124.796

— 32.965

— 21.028

6.687  
5.619

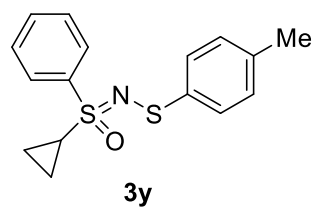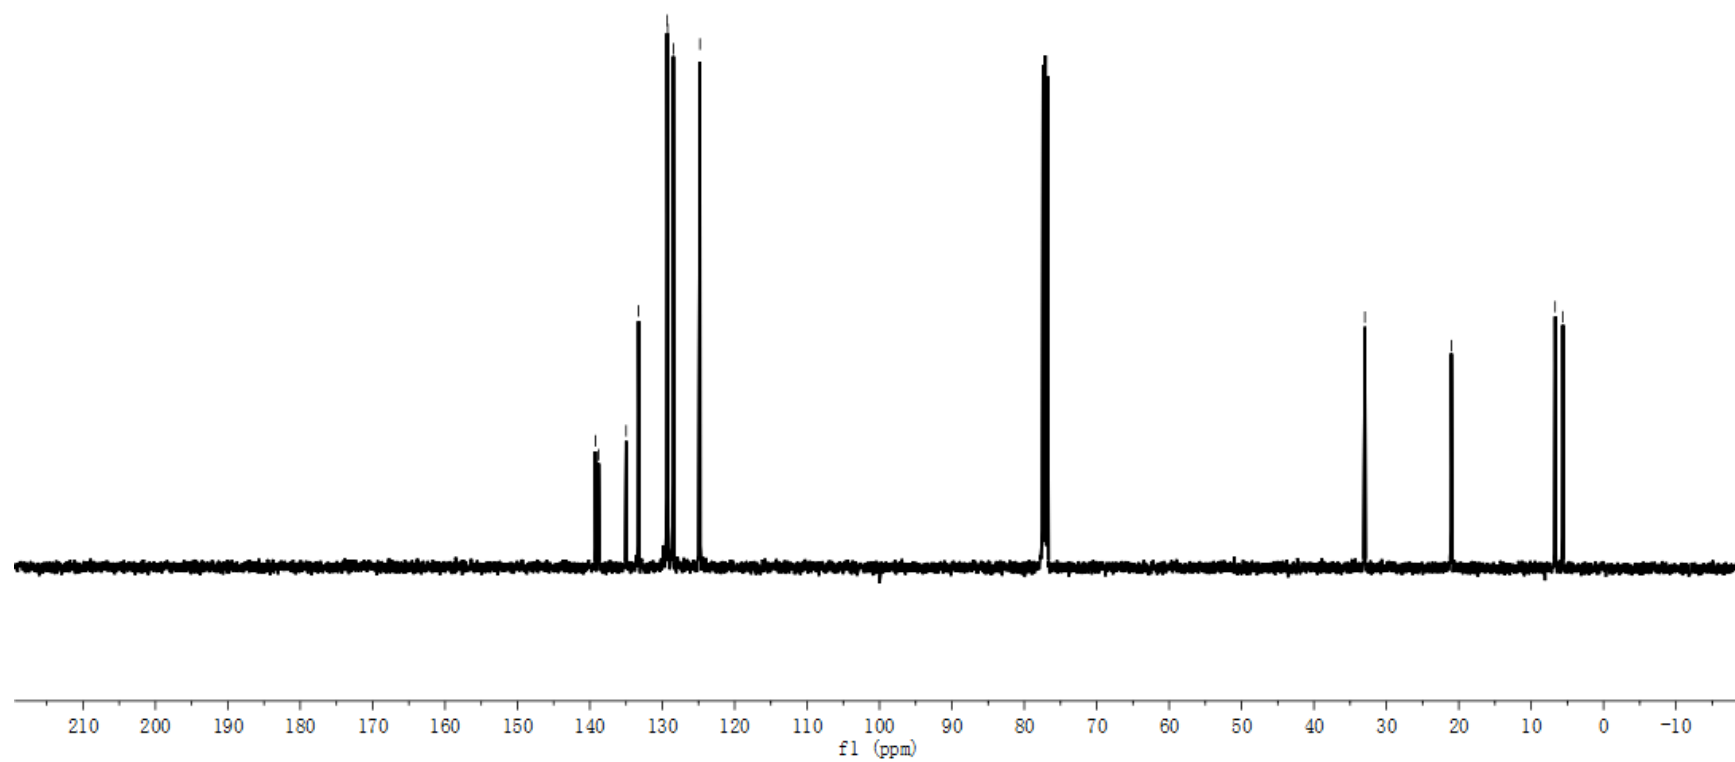

<sup>1</sup>H NMR spectra of compound **3z** (400 MHz, CDCl<sub>3</sub>)

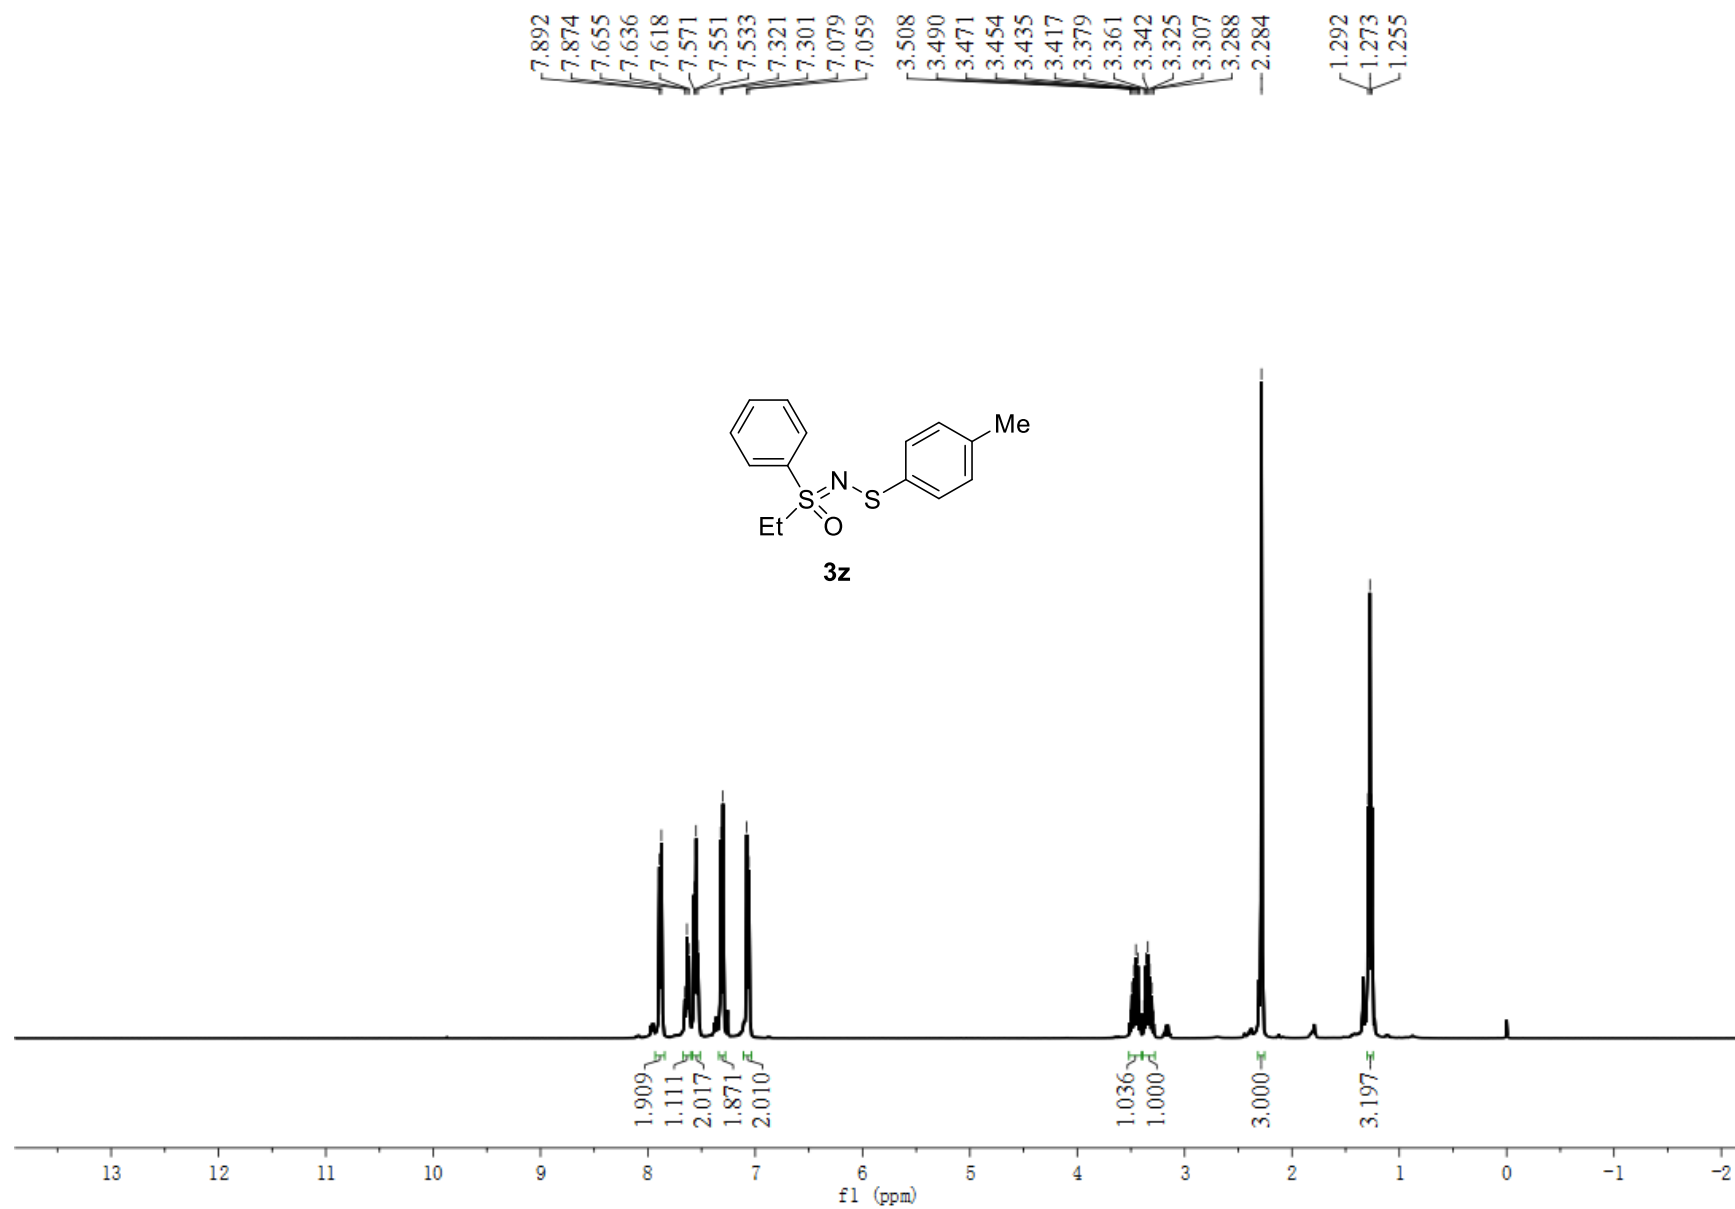

$^{13}\text{C}$  NMR spectra of compound **3z** (101 MHz,  $\text{CDCl}_3$ )

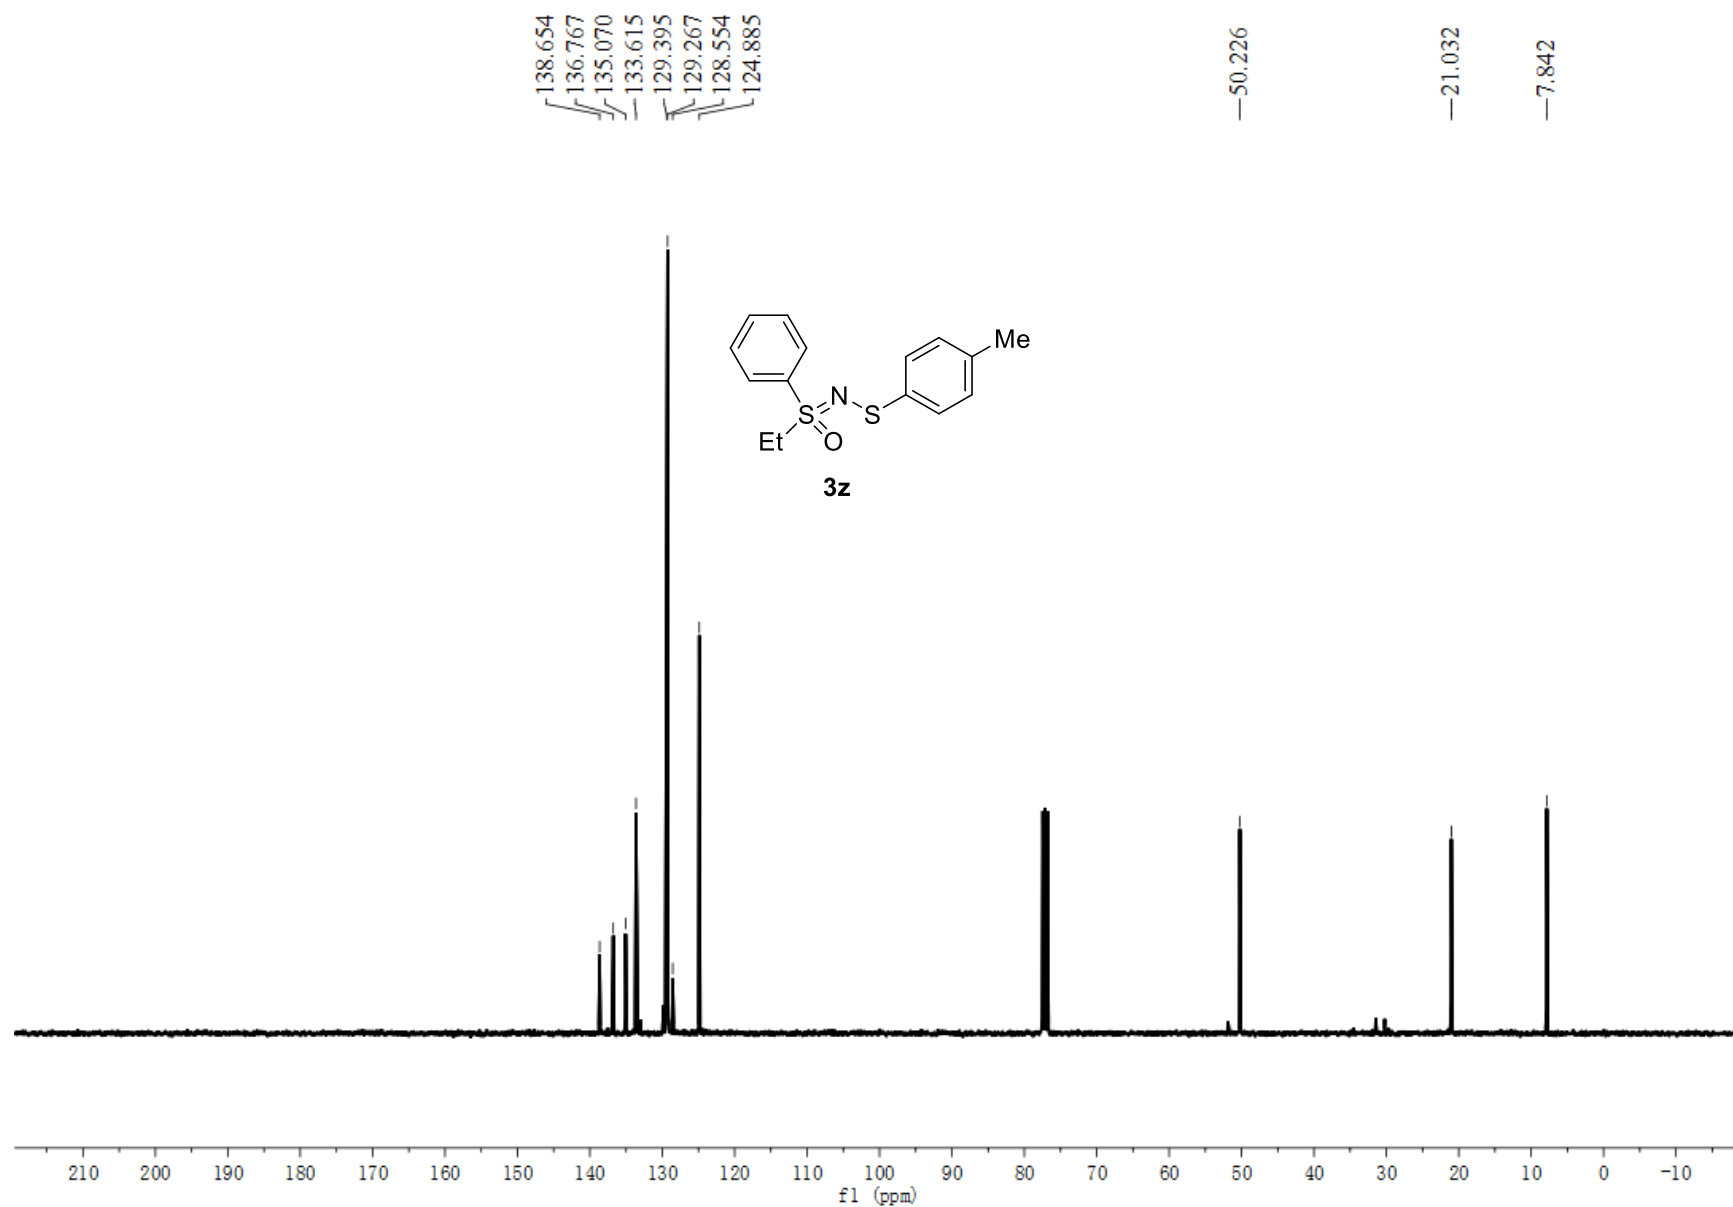

<sup>1</sup>H NMR spectra of compound **3za** (400 MHz, CDCl<sub>3</sub>)

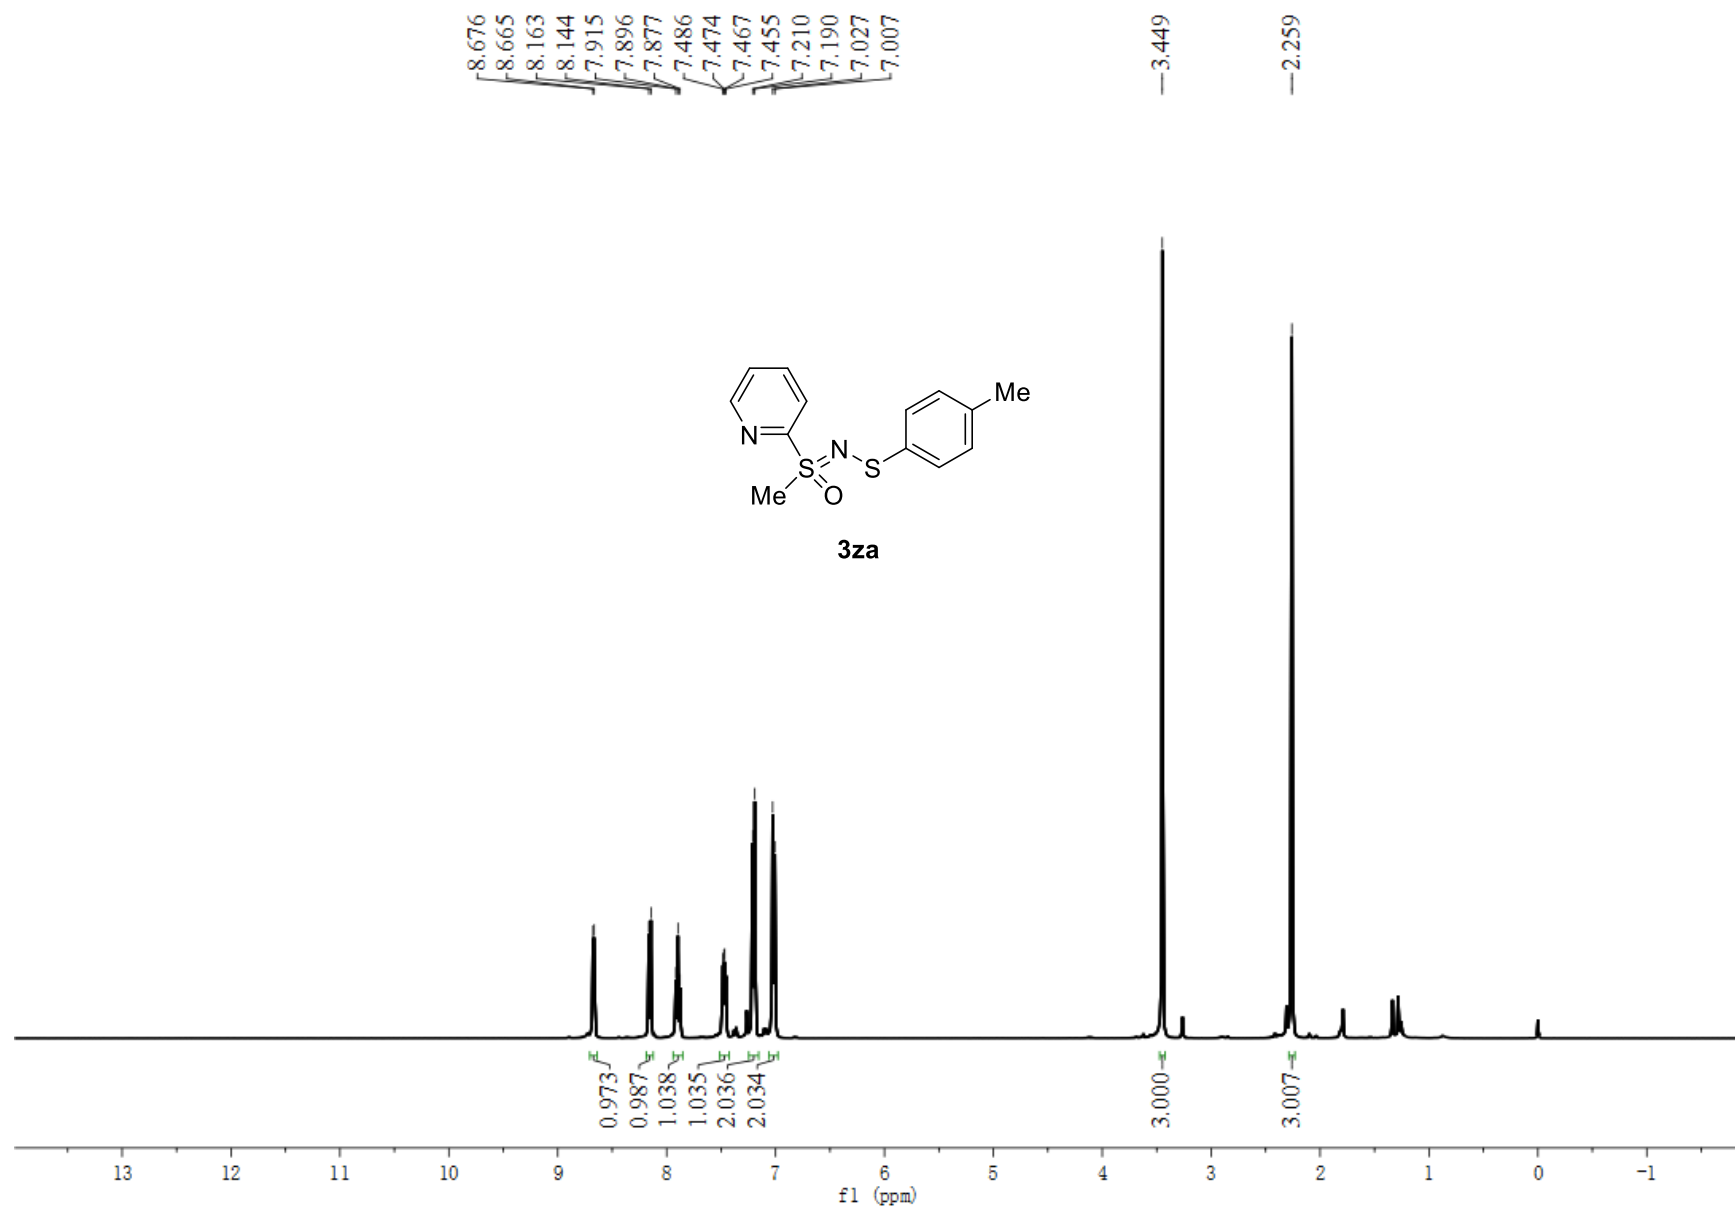

<sup>13</sup>C NMR spectra of compound **3za** (101 MHz, CDCl<sub>3</sub>)

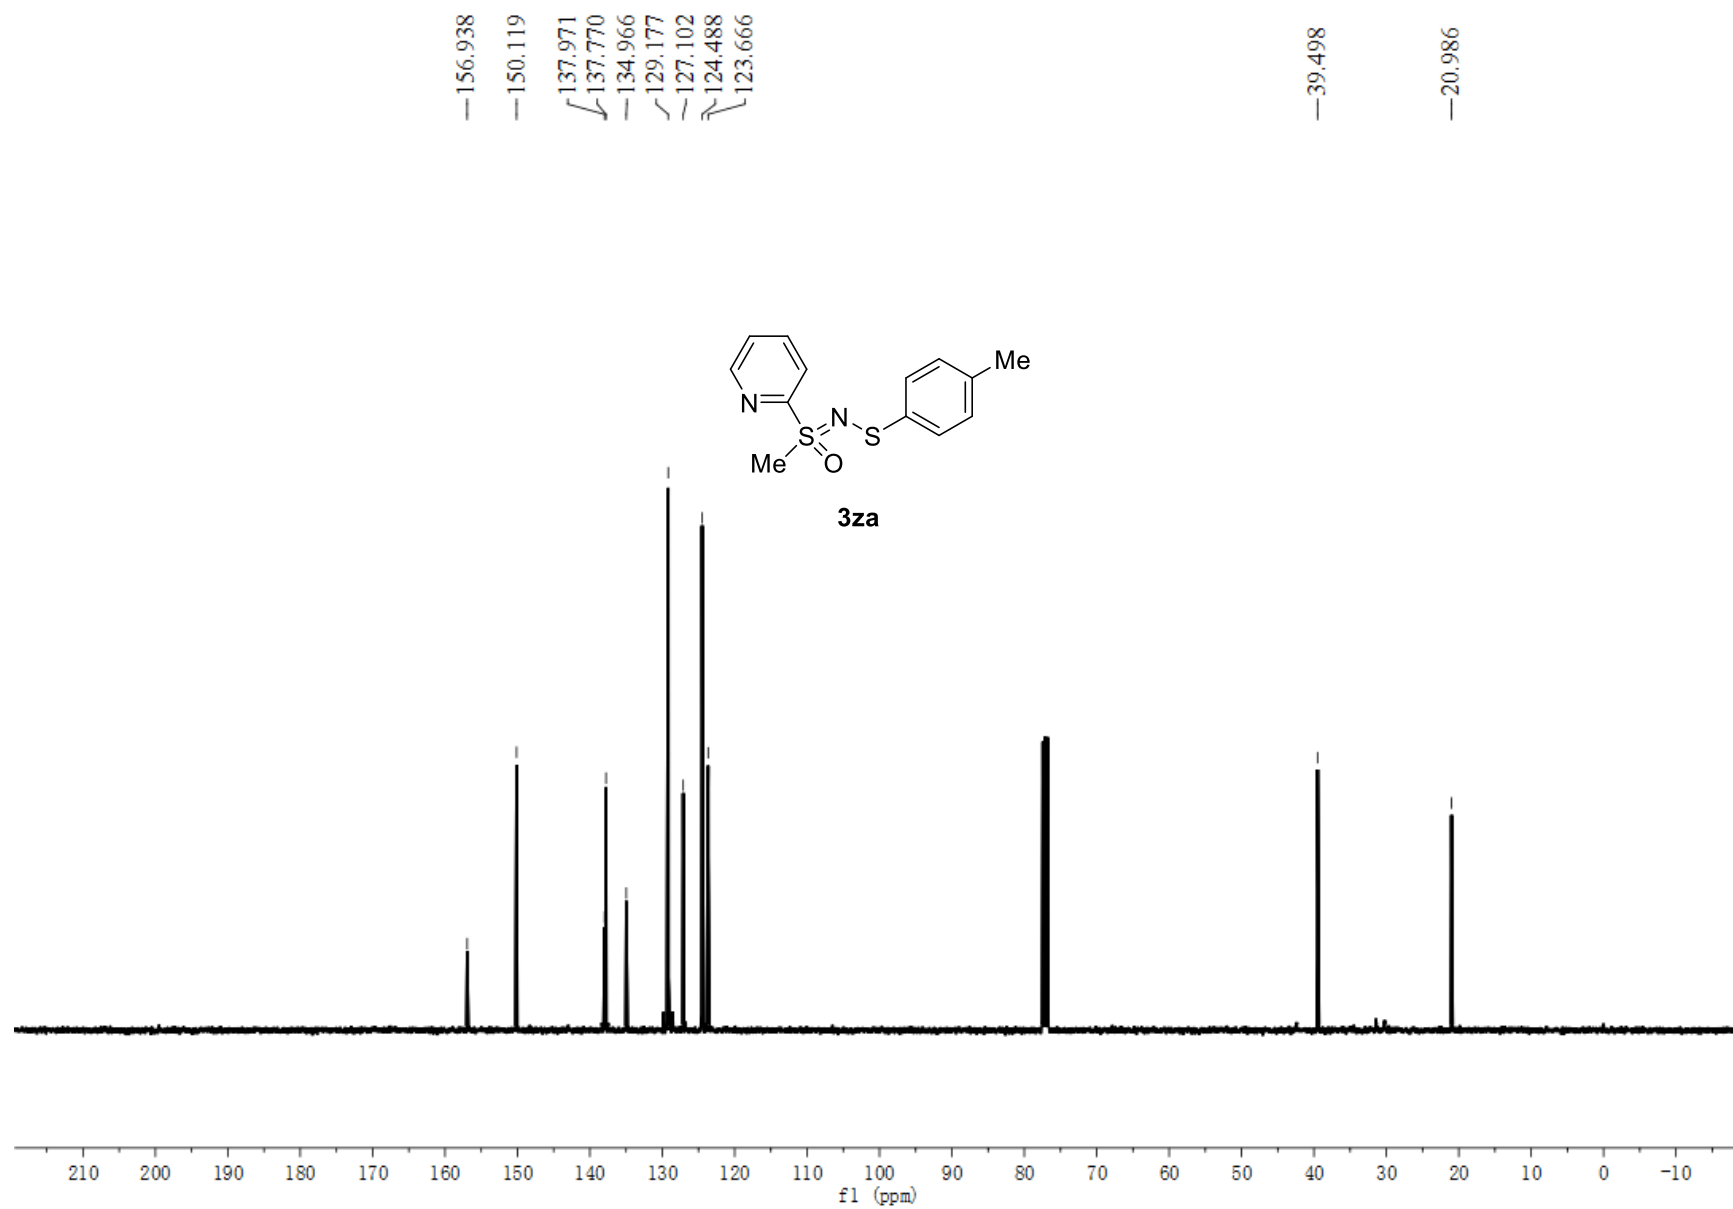

<sup>1</sup>H NMR spectra of compound **3zb** (400 MHz, CDCl<sub>3</sub>)

8.008  
7.989  
7.538  
7.520  
7.497  
7.478  
7.460  
7.355  
7.335  
7.073  
7.053

-2.276

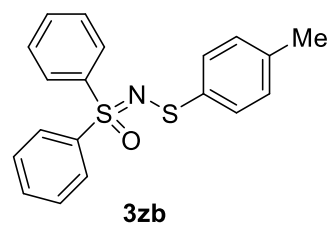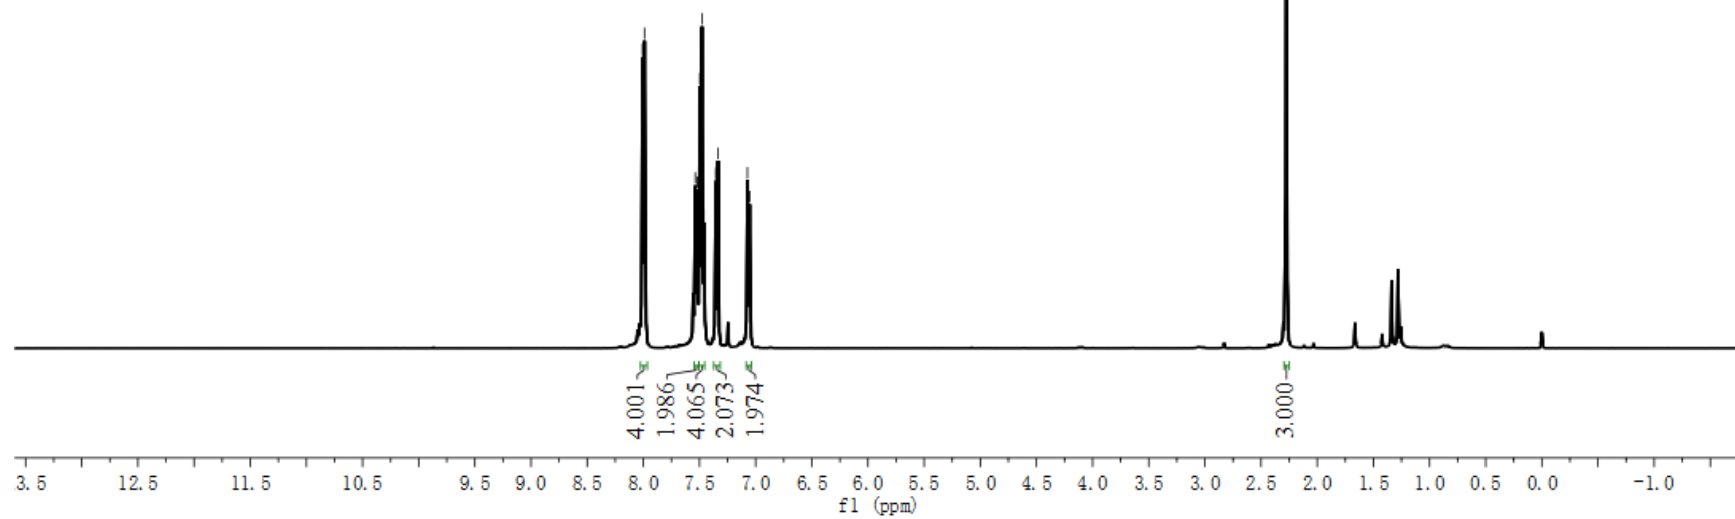

$^{13}\text{C}$  NMR spectra of compound **3zb** (101 MHz,  $\text{CDCl}_3$ )

140.076  
138.339  
135.202  
133.162  
129.330  
129.289  
128.535  
125.180

—21.055

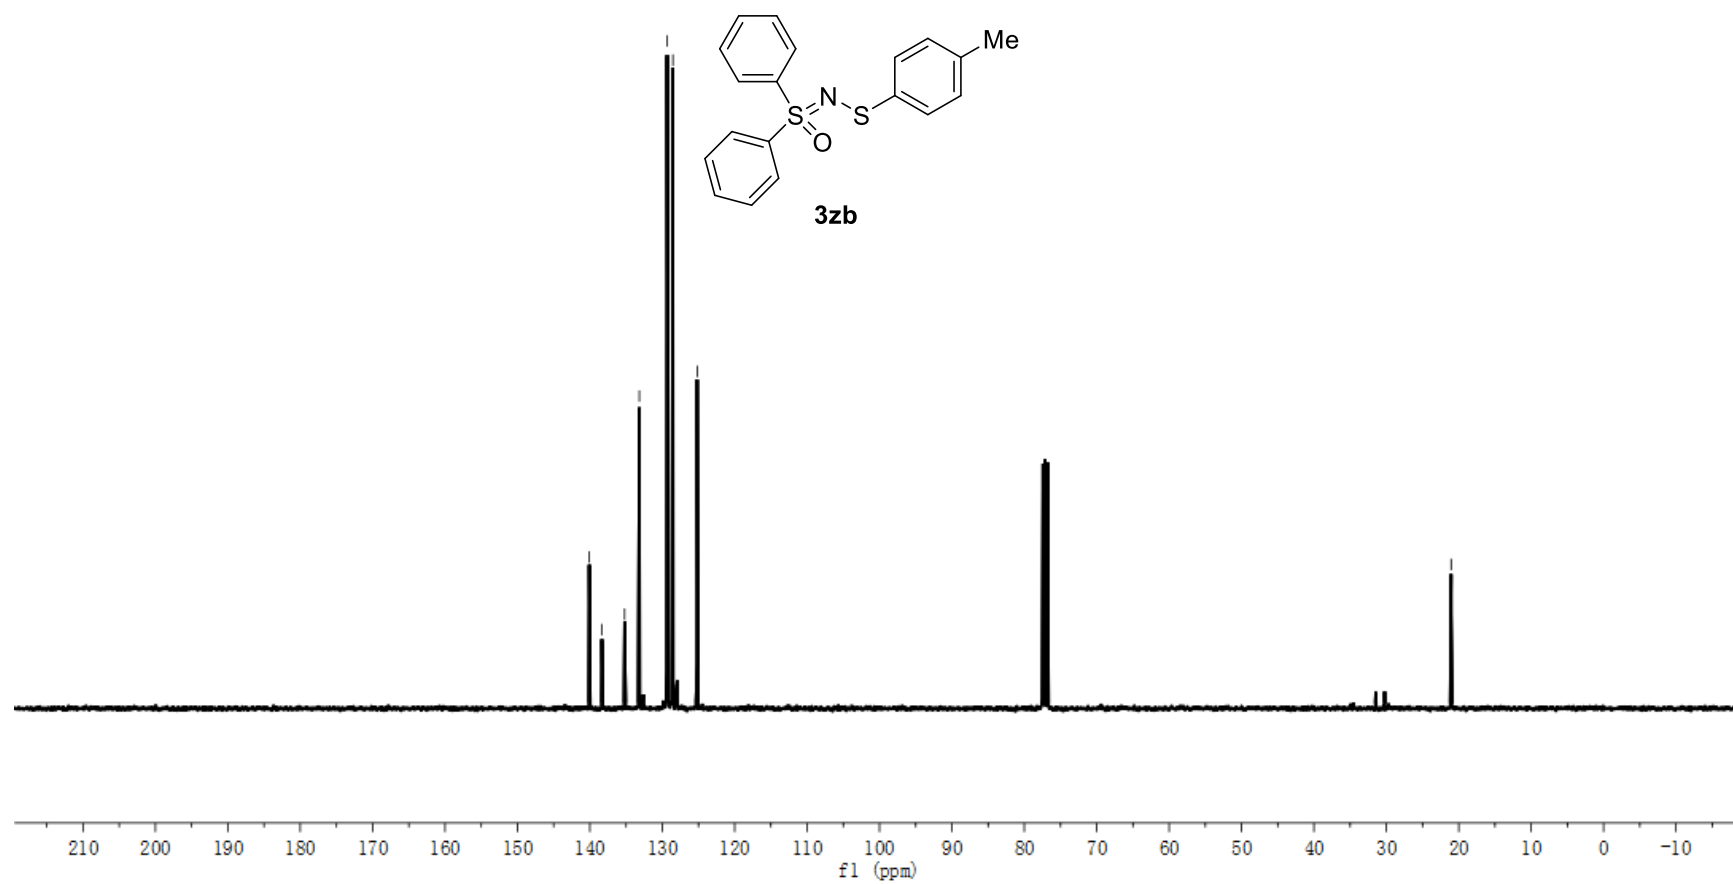

<sup>1</sup>H NMR spectra of compound **3zc** (400 MHz, CDCl<sub>3</sub>)

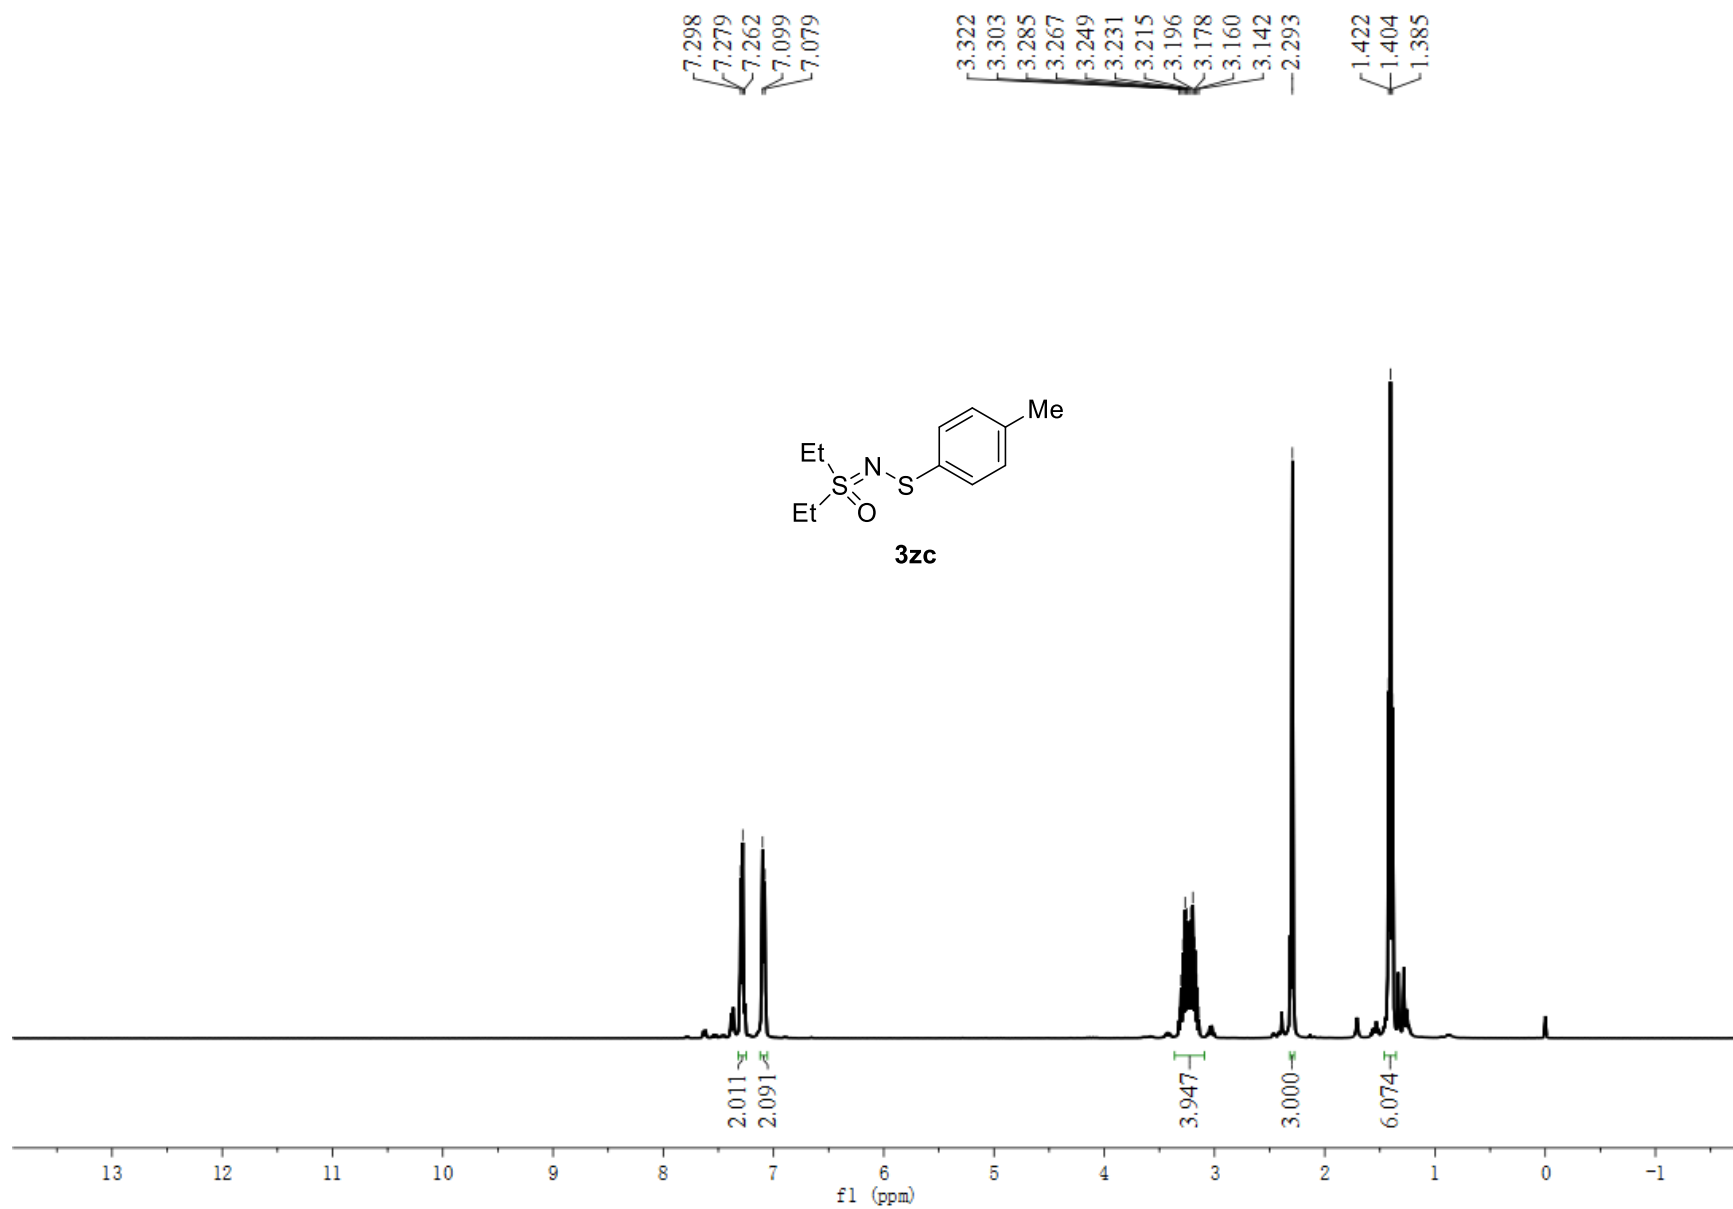

$^{13}\text{C}$  NMR spectra of compound **3zc** (101 MHz,  $\text{CDCl}_3$ )

139.014  
134.862  
129.269  
124.098

44.638

20.921

7.713

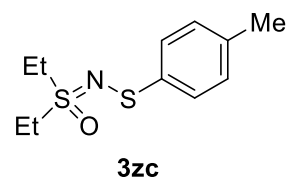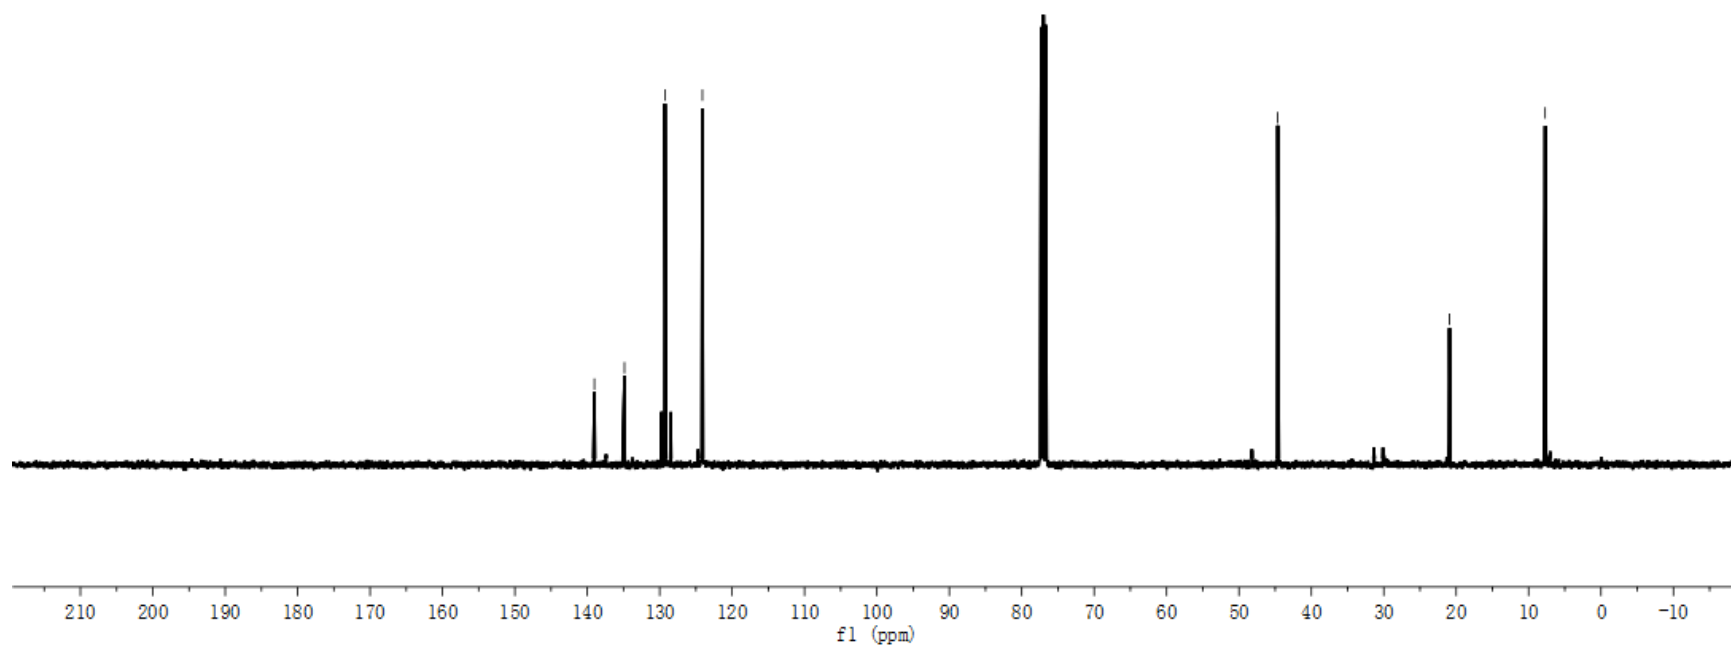

<sup>1</sup>H NMR spectra of compound **3zd** (400 MHz, CDCl<sub>3</sub>)

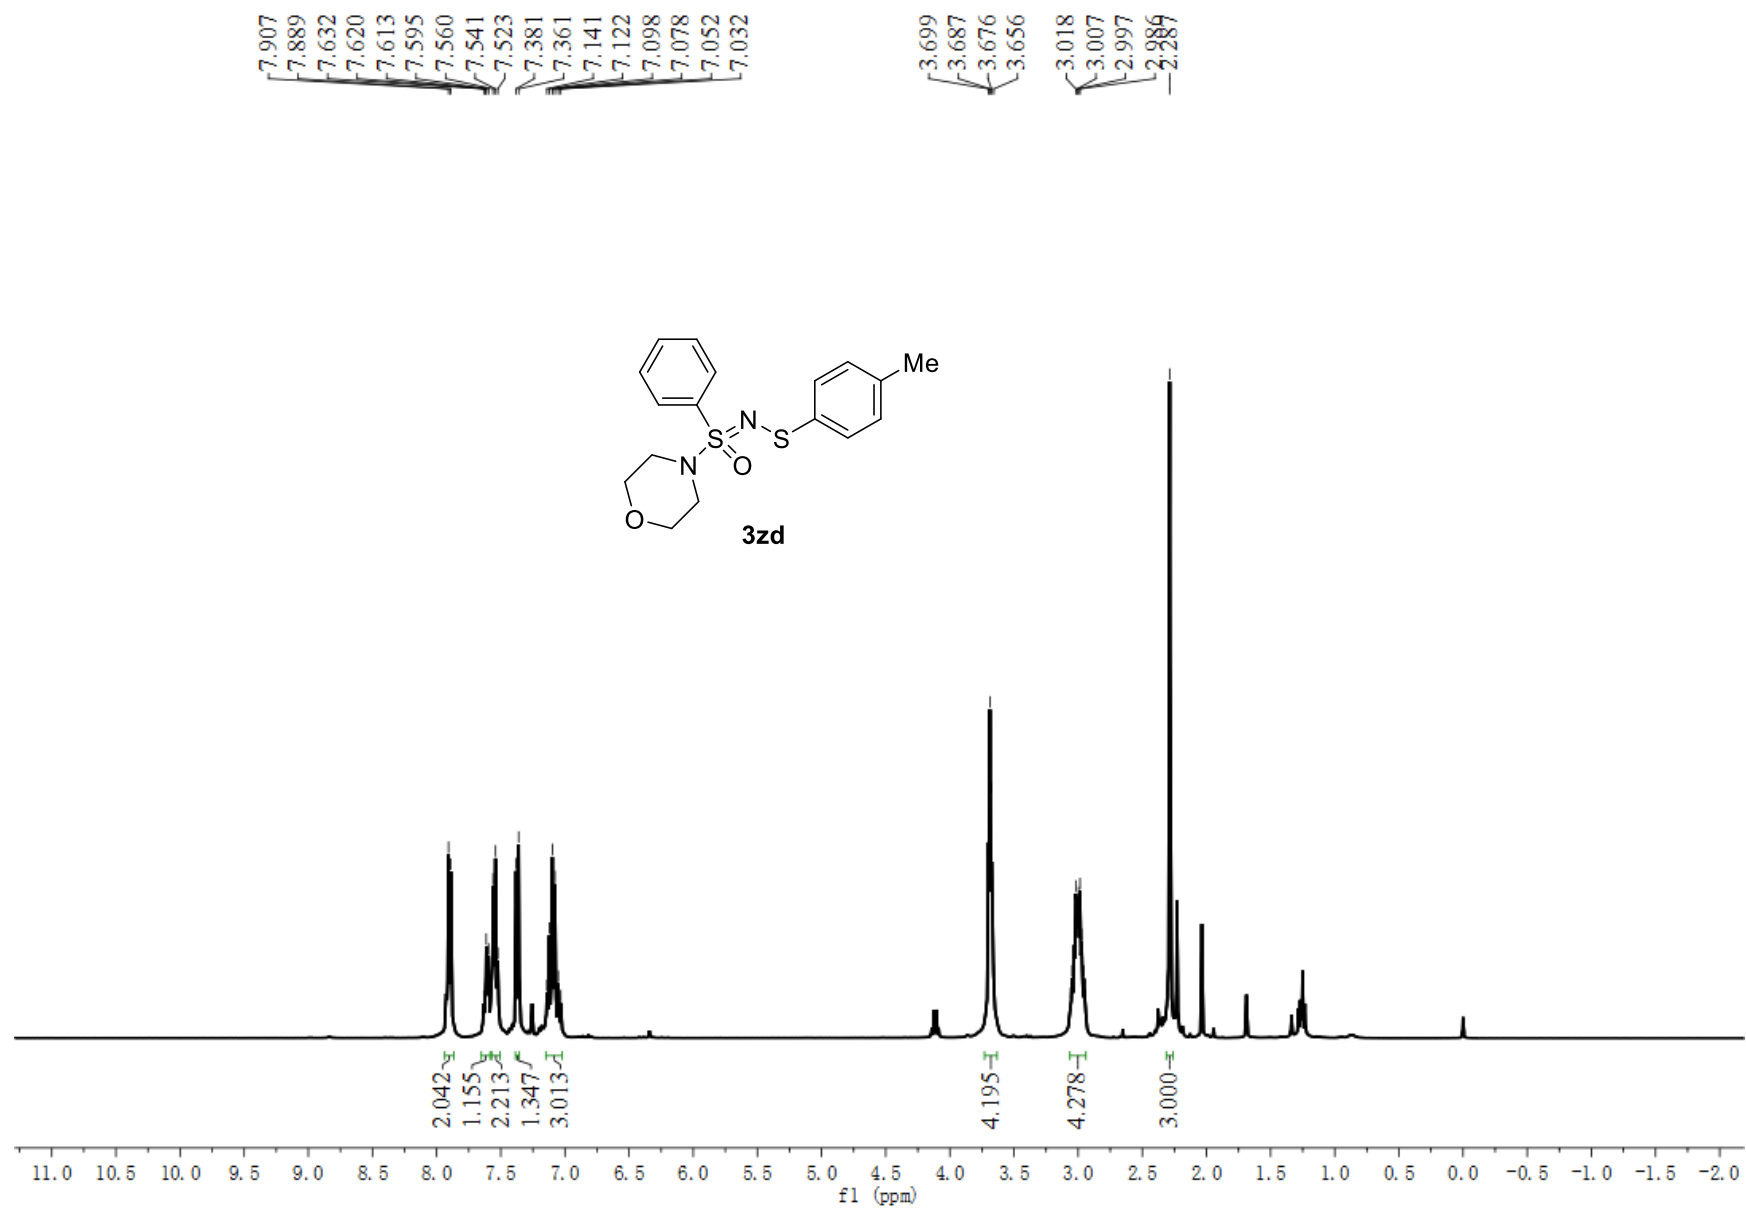

$^{13}\text{C}\{^1\text{H}\}$  NMR spectra of compound **3zd** (101 MHz,  $\text{CDCl}_3$ )

137.699  
135.425  
134.653  
133.088  
129.388  
129.107  
128.115  
125.393

—66.118

—46.695

—21.059

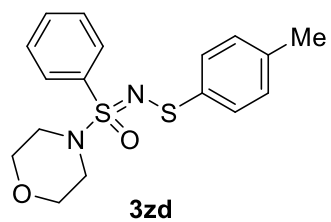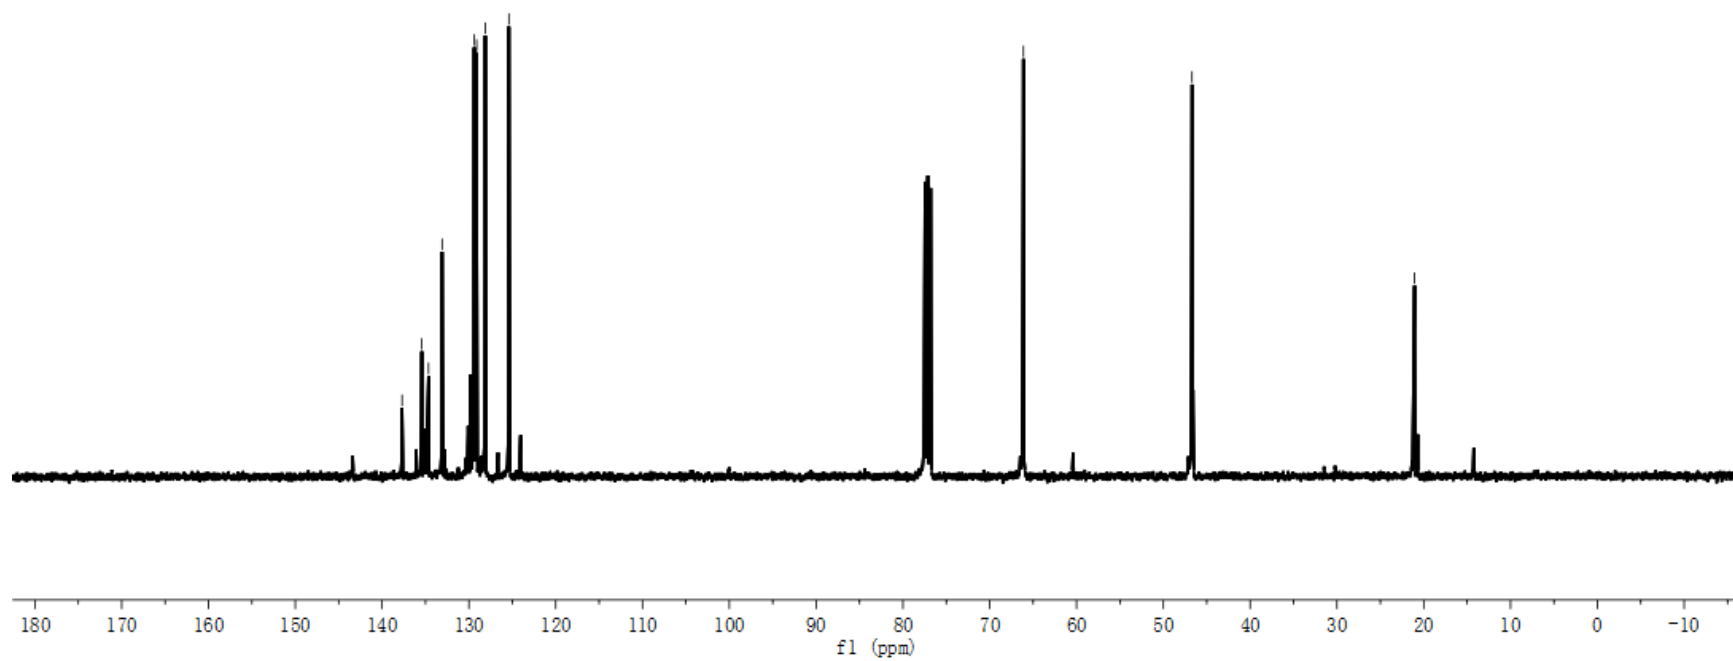

<sup>1</sup>H NMR spectra of compound **3ze** (400 MHz, CDCl<sub>3</sub>)

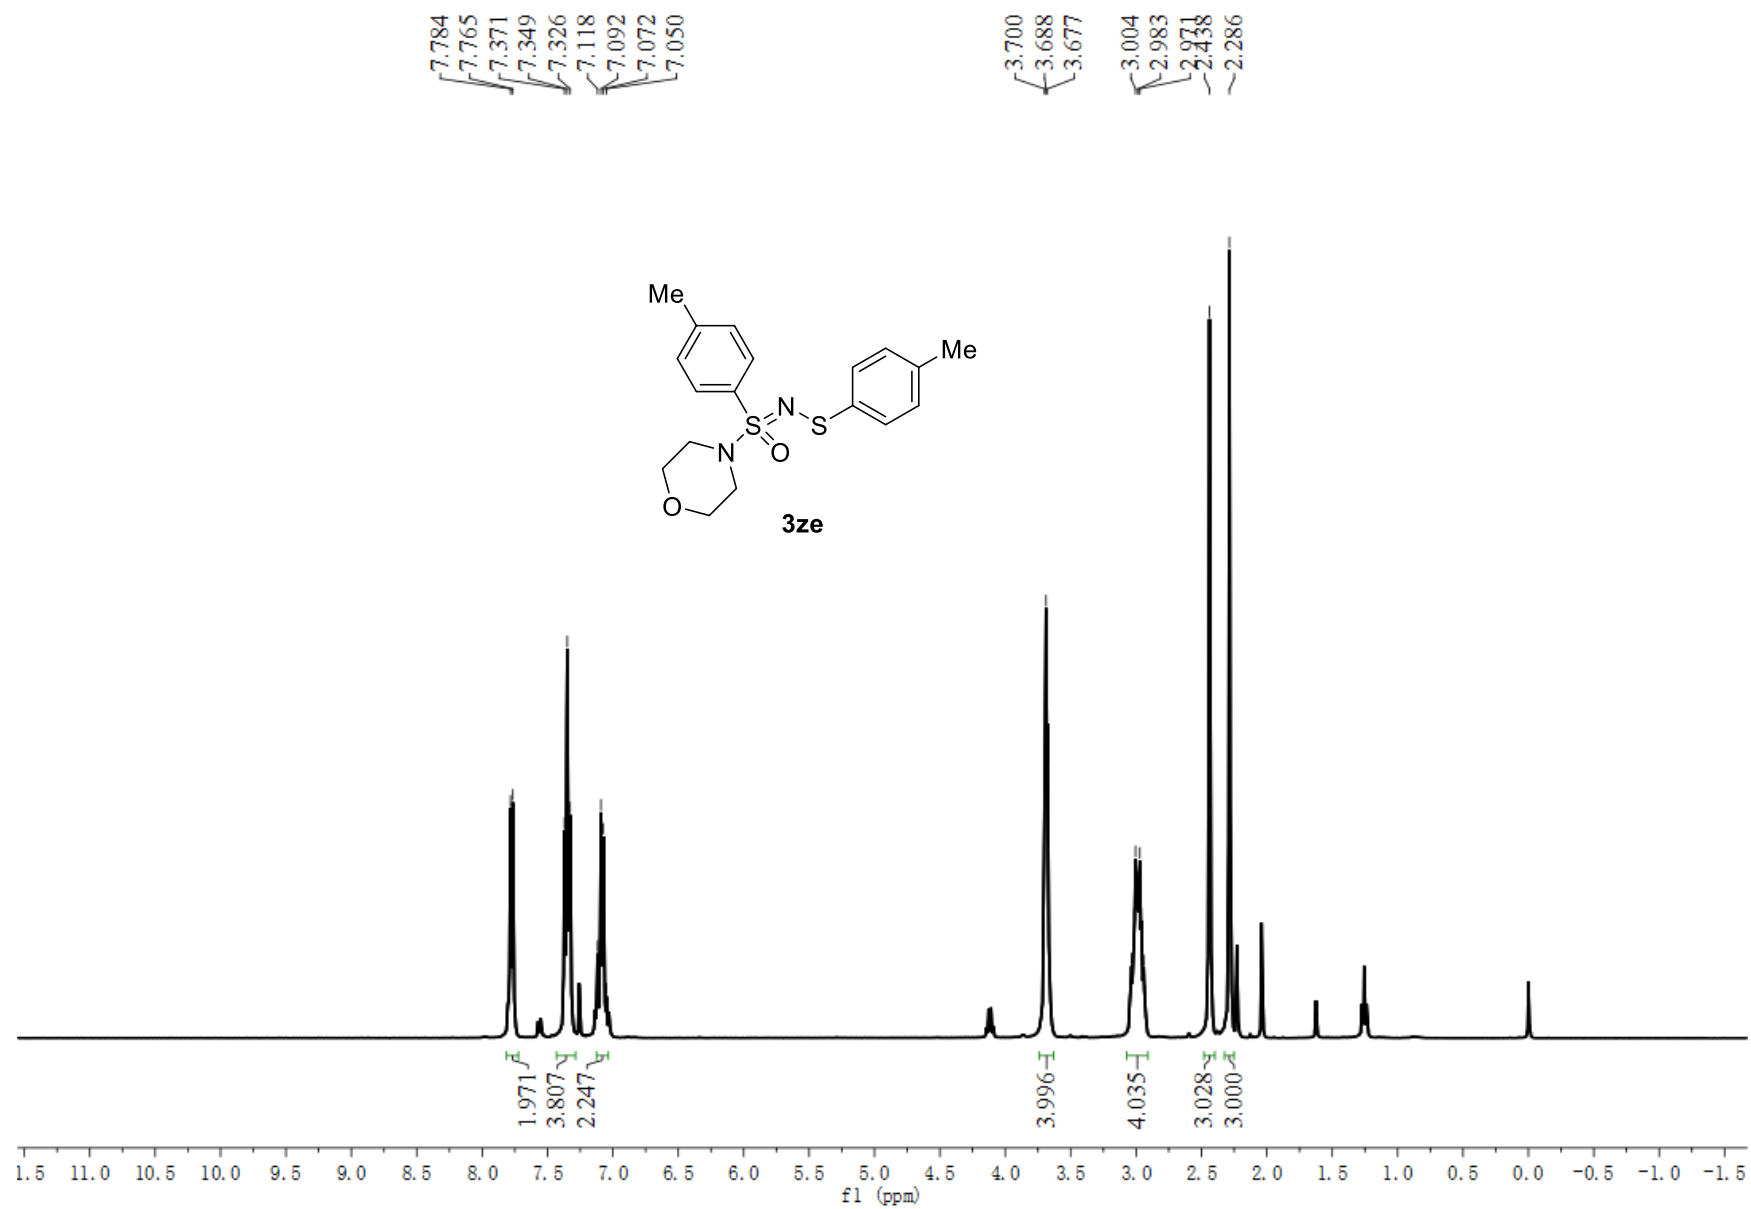

<sup>13</sup>C NMR spectra of compound **3ze** (101 MHz, CDCl<sub>3</sub>)

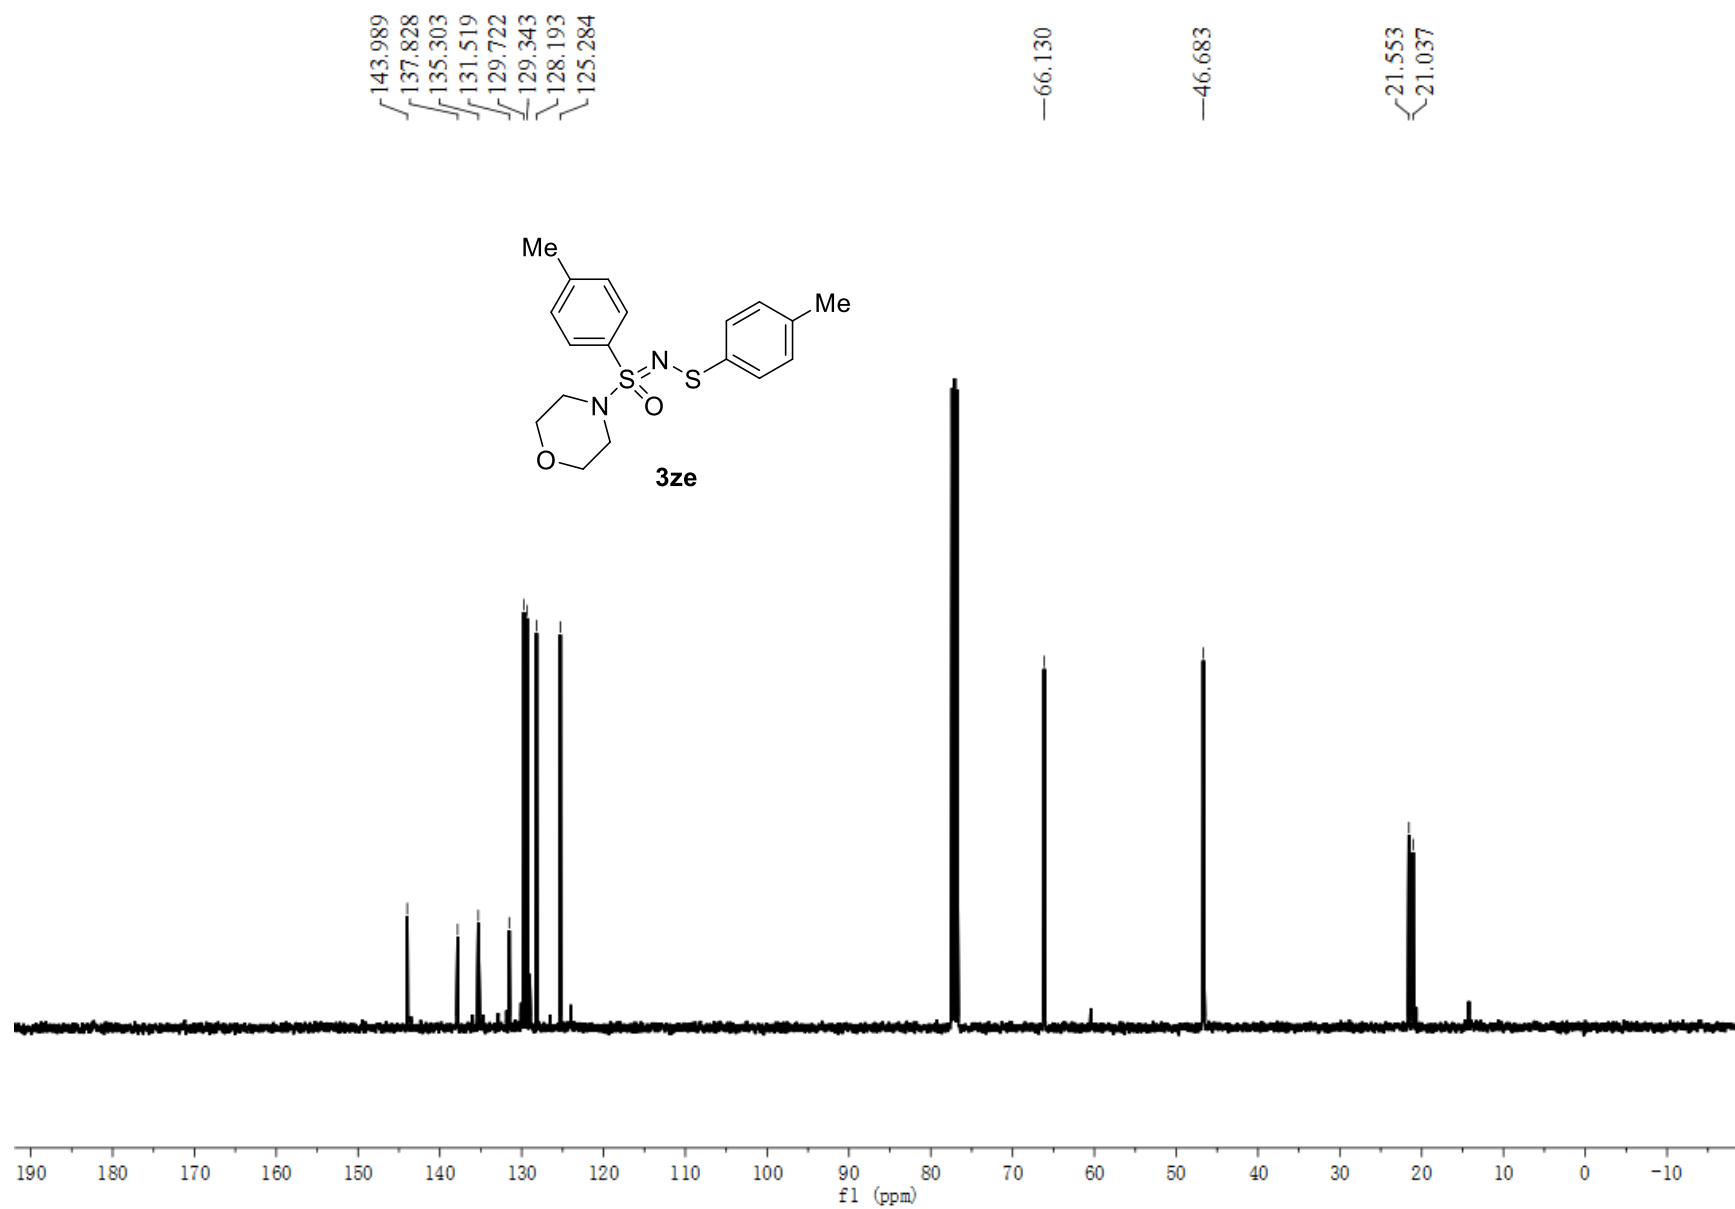

<sup>1</sup>H NMR spectra of compound **3zf** (400 MHz, CDCl<sub>3</sub>)

7.838  
7.816  
7.524  
7.502  
7.365  
7.344  
7.104  
7.084  
3.704  
3.692  
3.680  
3.016  
3.005  
2.995  
2.983  
2.973

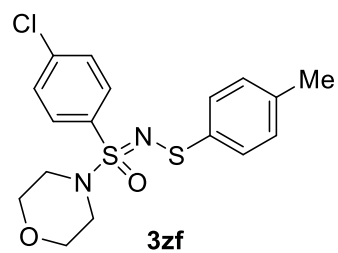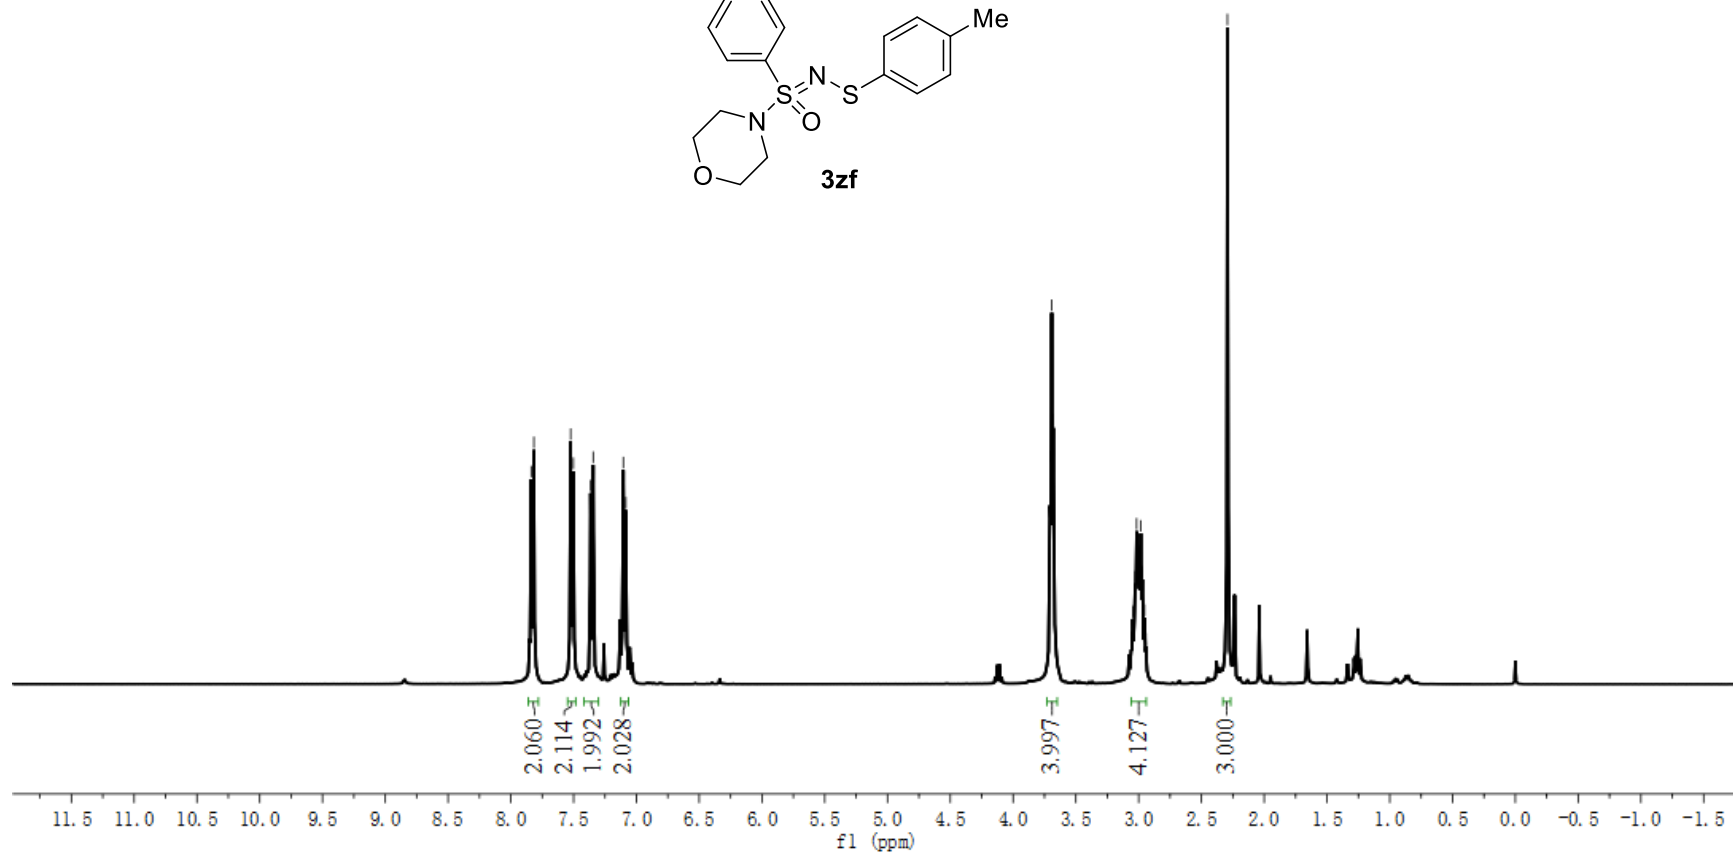

<sup>13</sup>C NMR spectra of compound **3zf** (101 MHz, CDCl<sub>3</sub>)

139.765  
137.339  
135.686  
133.303  
129.535  
129.438  
129.396  
125.577

—66.076

—46.659

—21.058

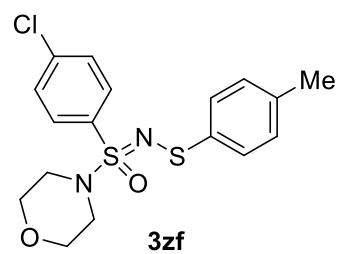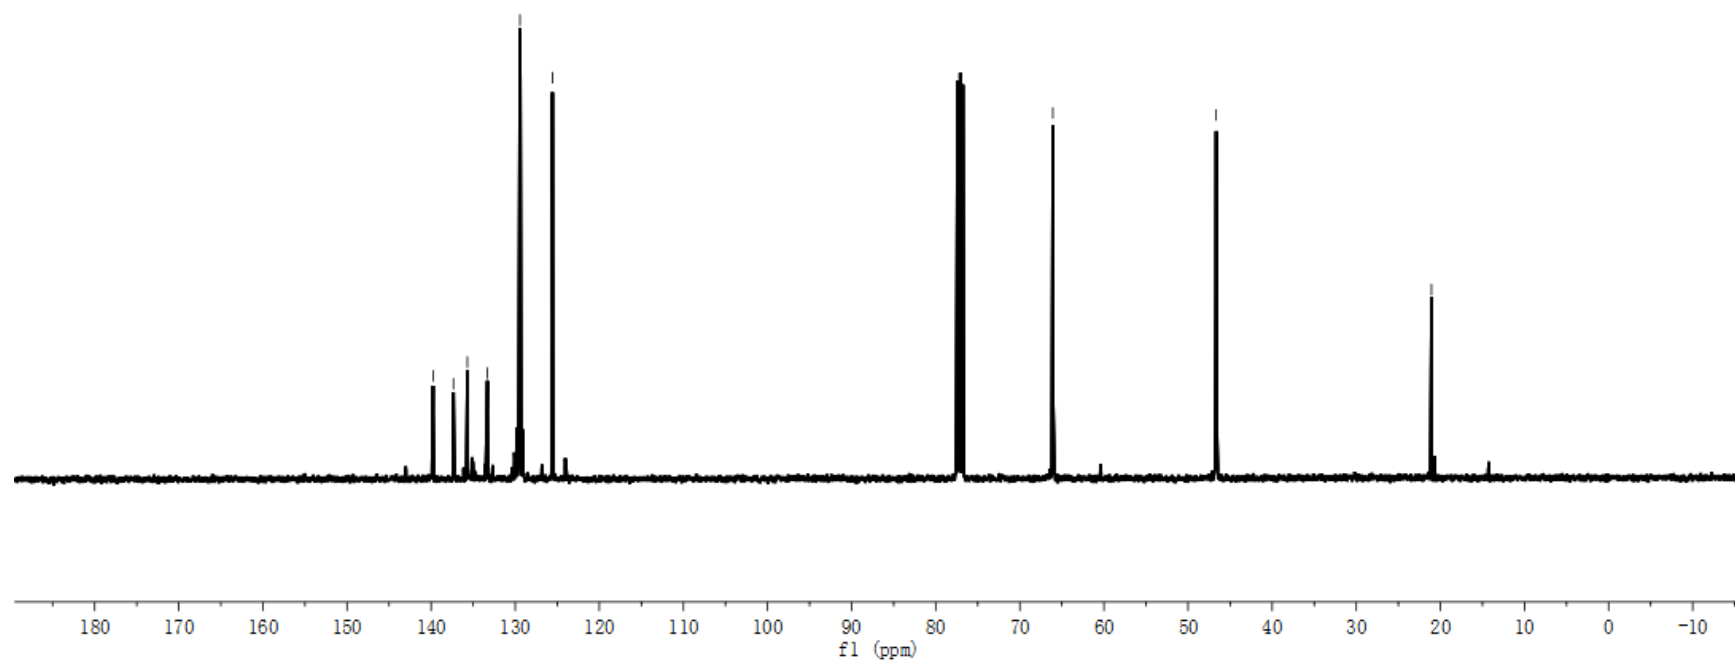

<sup>1</sup>H NMR spectra of compound **3zg** (400 MHz, CDCl<sub>3</sub>)

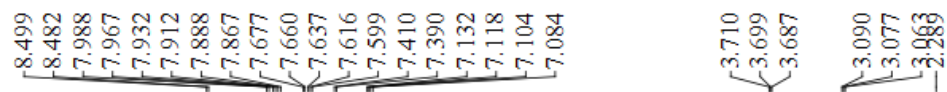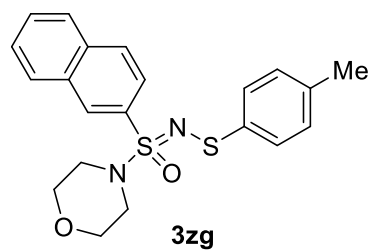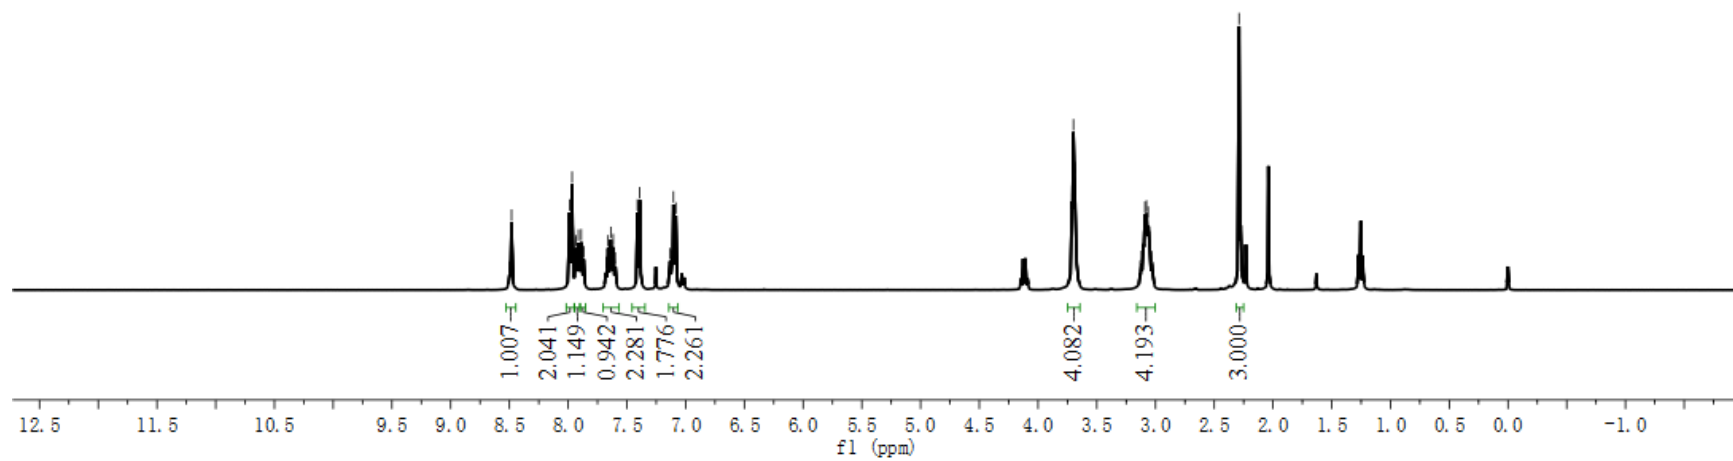

<sup>13</sup>C NMR spectra of compound **3zg** (101 MHz, CDCl<sub>3</sub>)

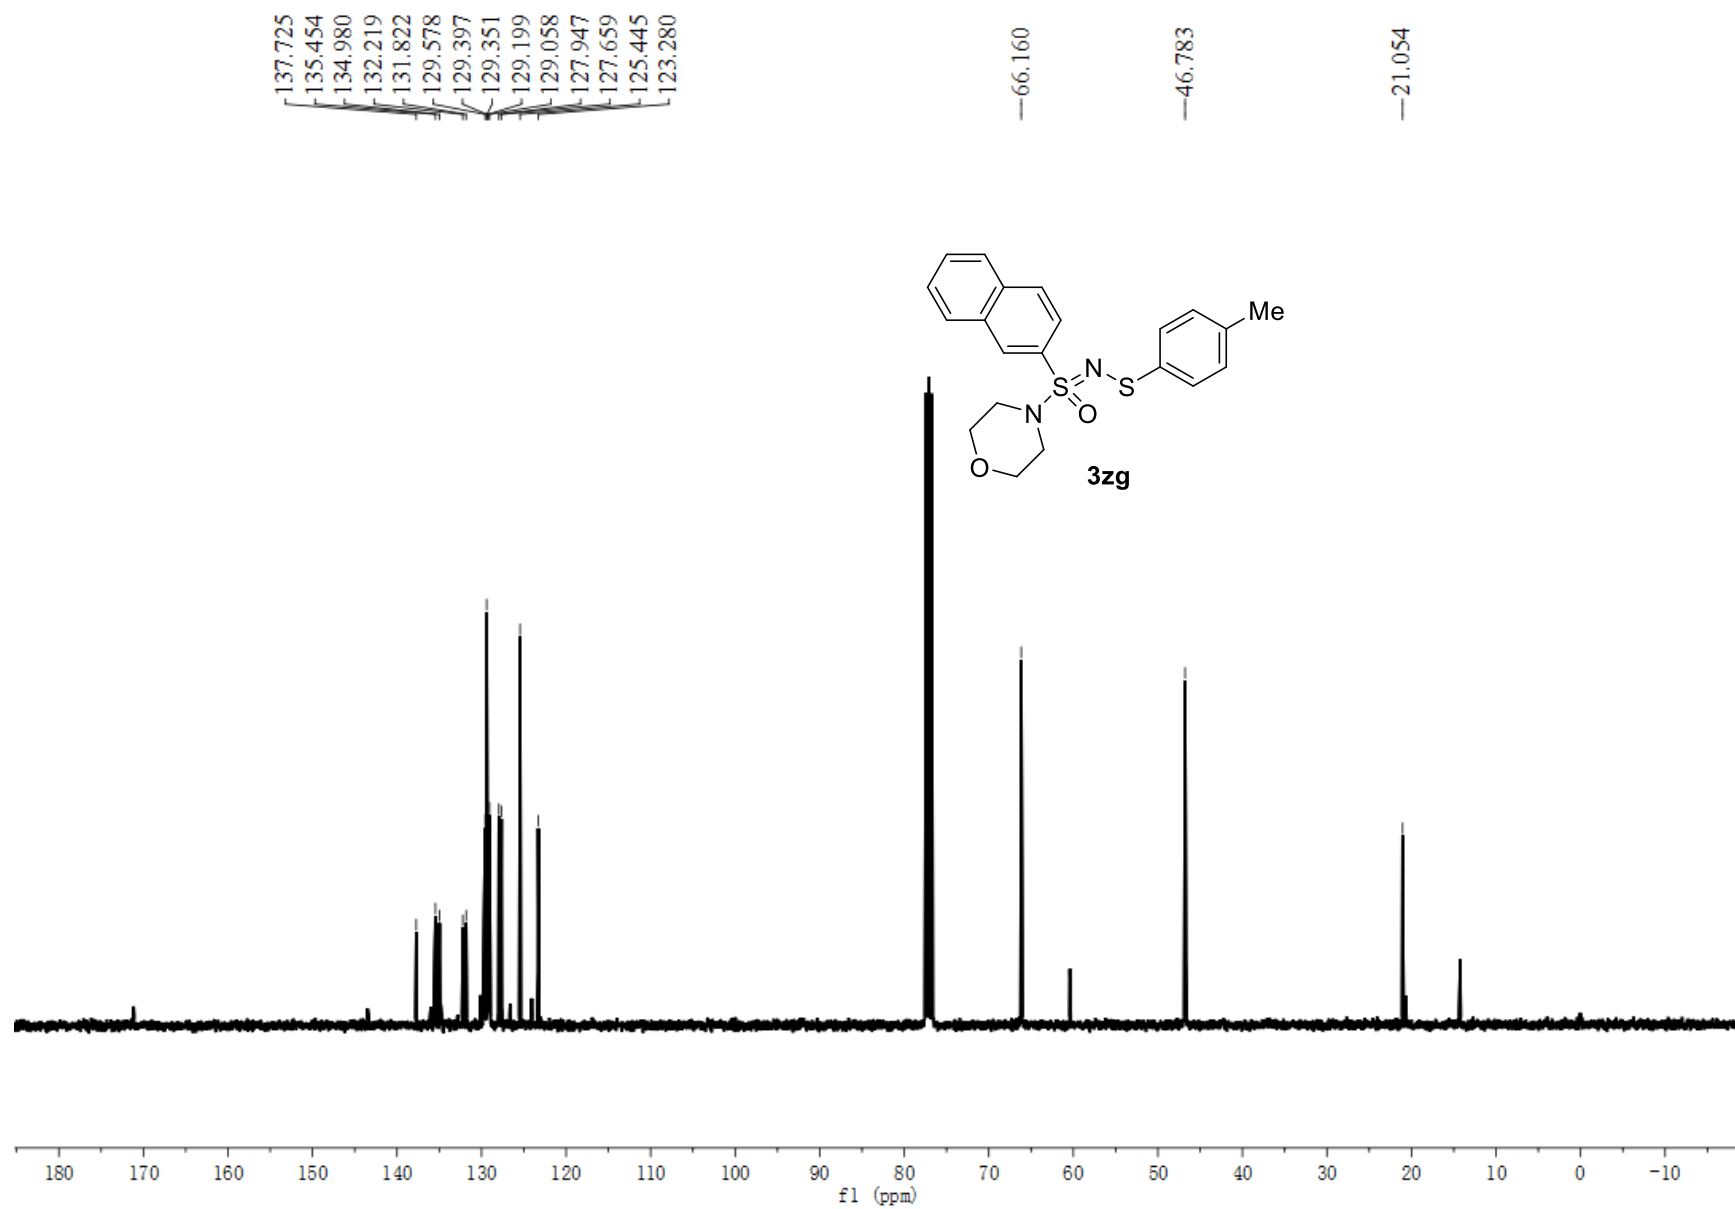

<sup>1</sup>H NMR spectra of compound **3zh** (400 MHz, CDCl<sub>3</sub>)

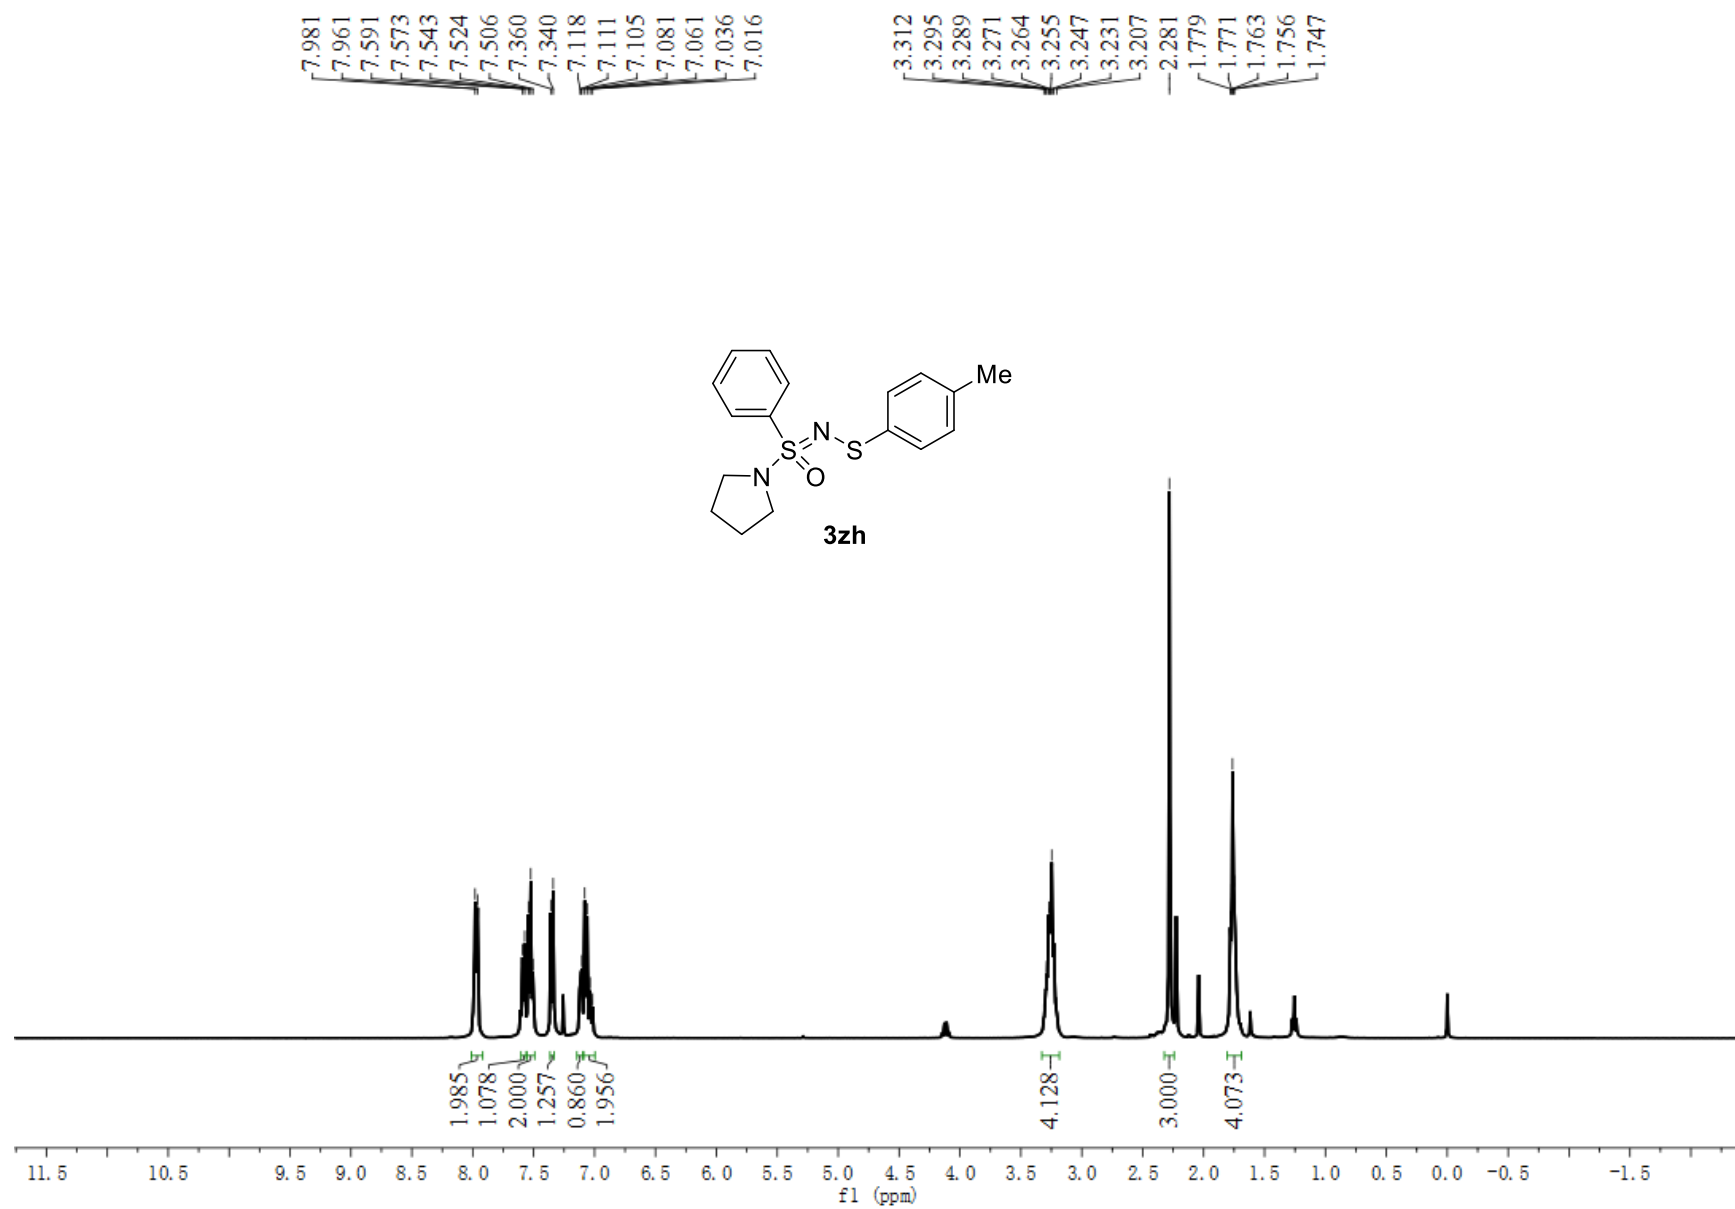

<sup>13</sup>C NMR spectra of compound **3zh** (101 MHz, CDCl<sub>3</sub>)

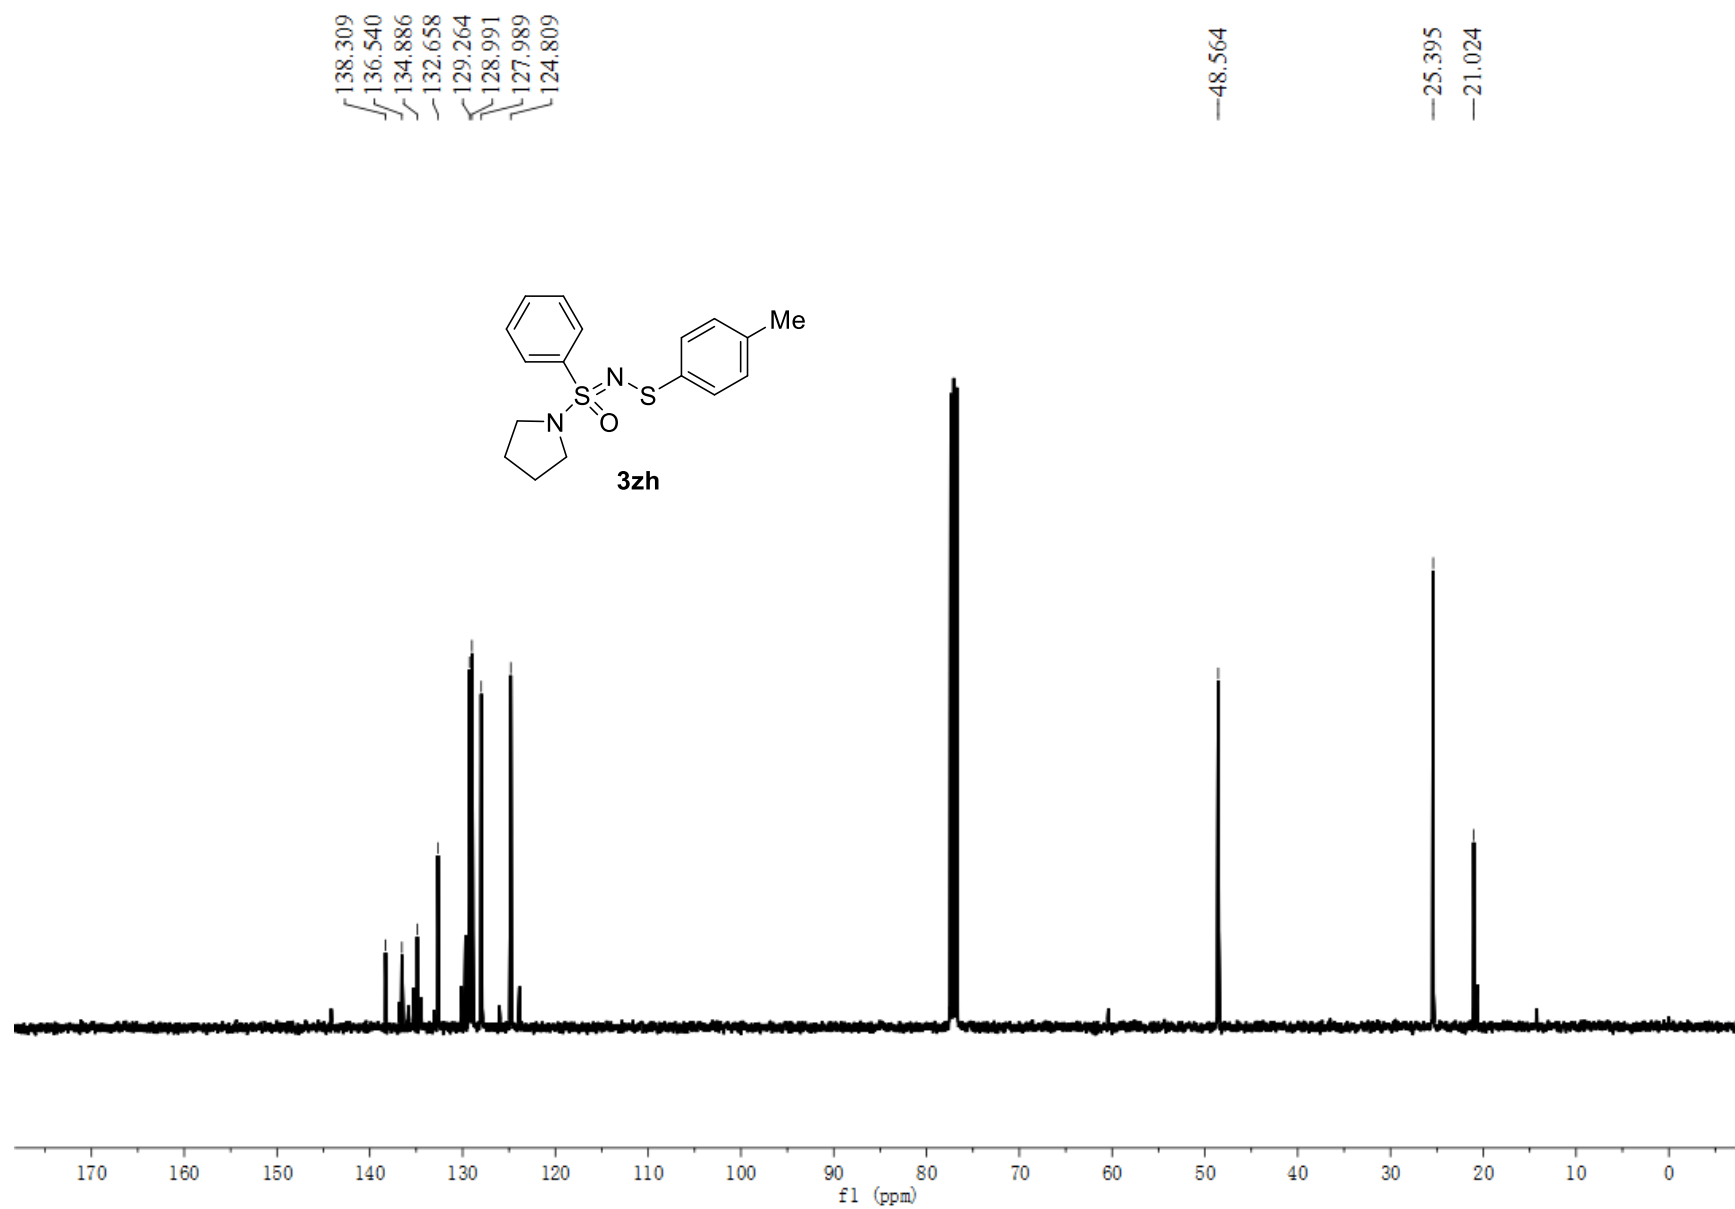

<sup>1</sup>H NMR spectra of compound **6a** (400 MHz, CDCl<sub>3</sub>)

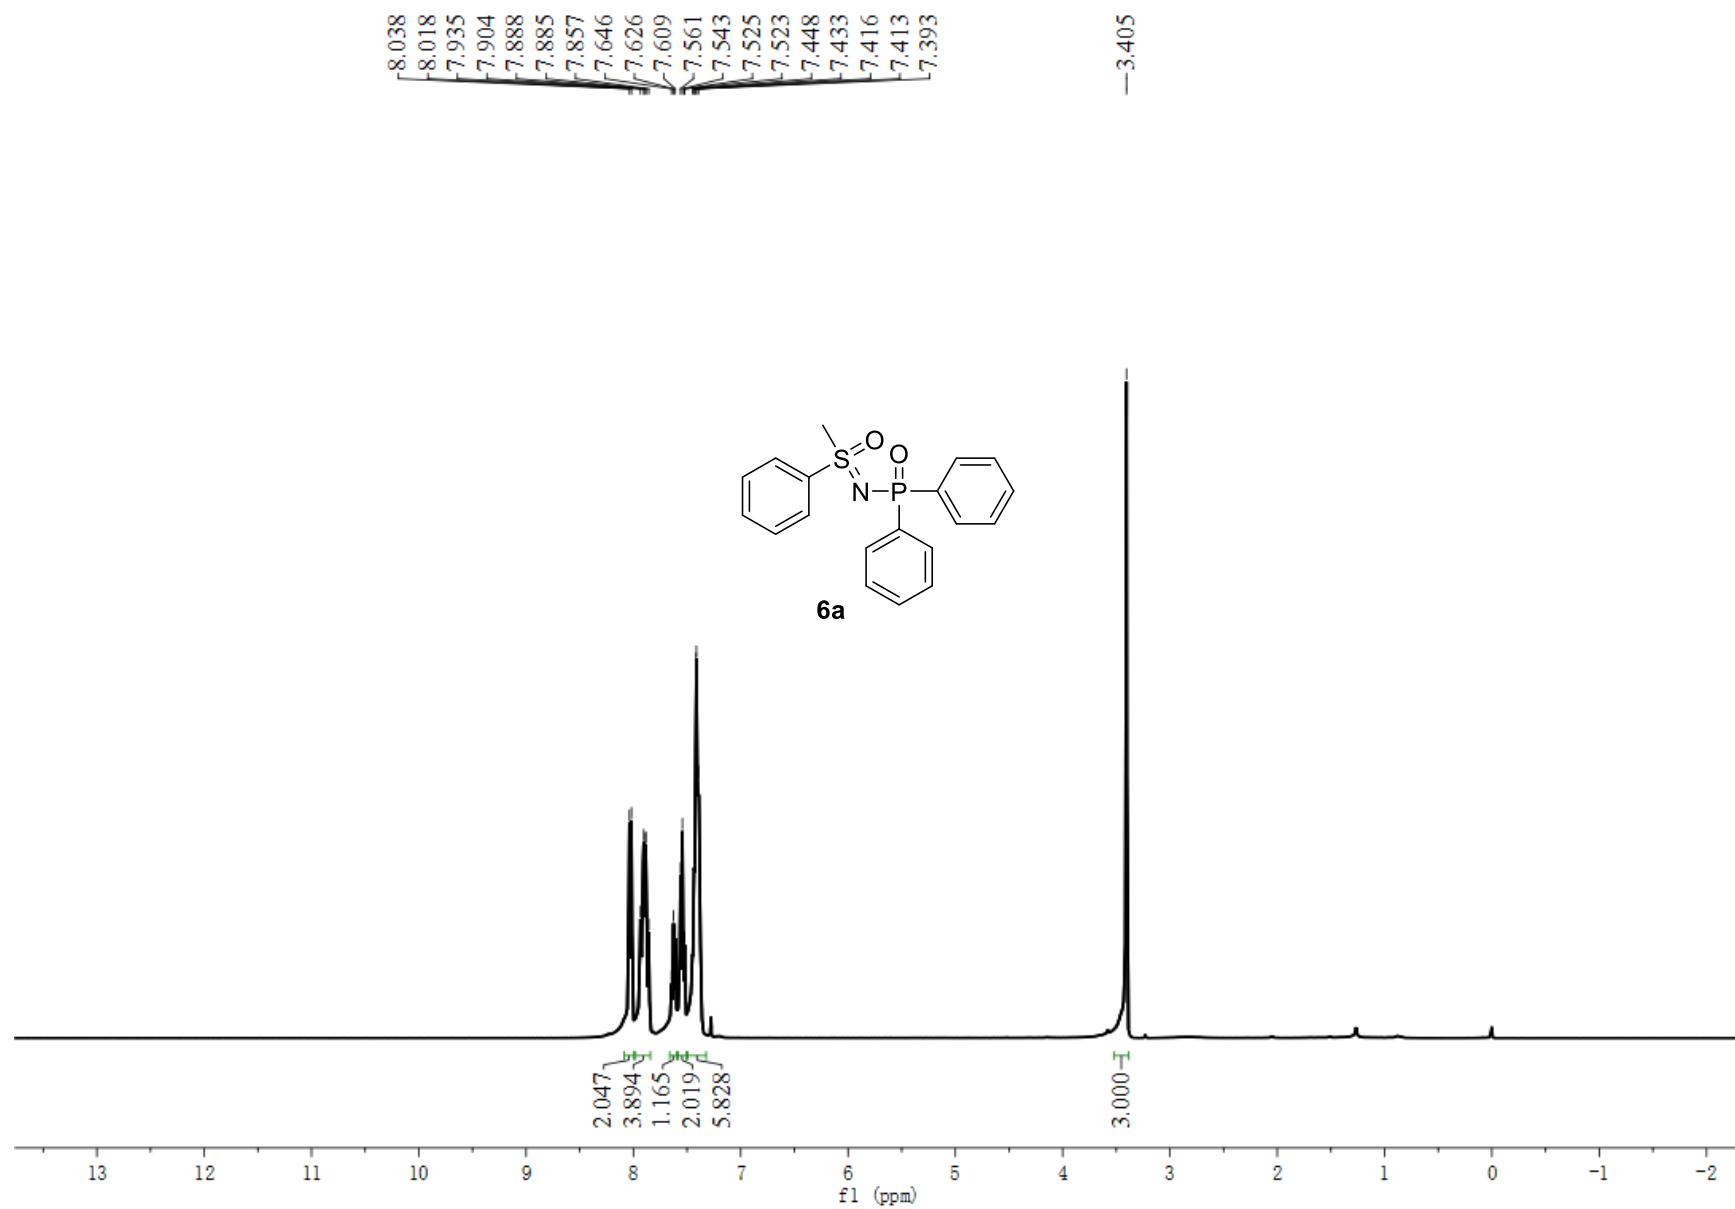

$^{13}\text{C}$  NMR spectra of compound **6a** (101 MHz,  $\text{CDCl}_3$ )

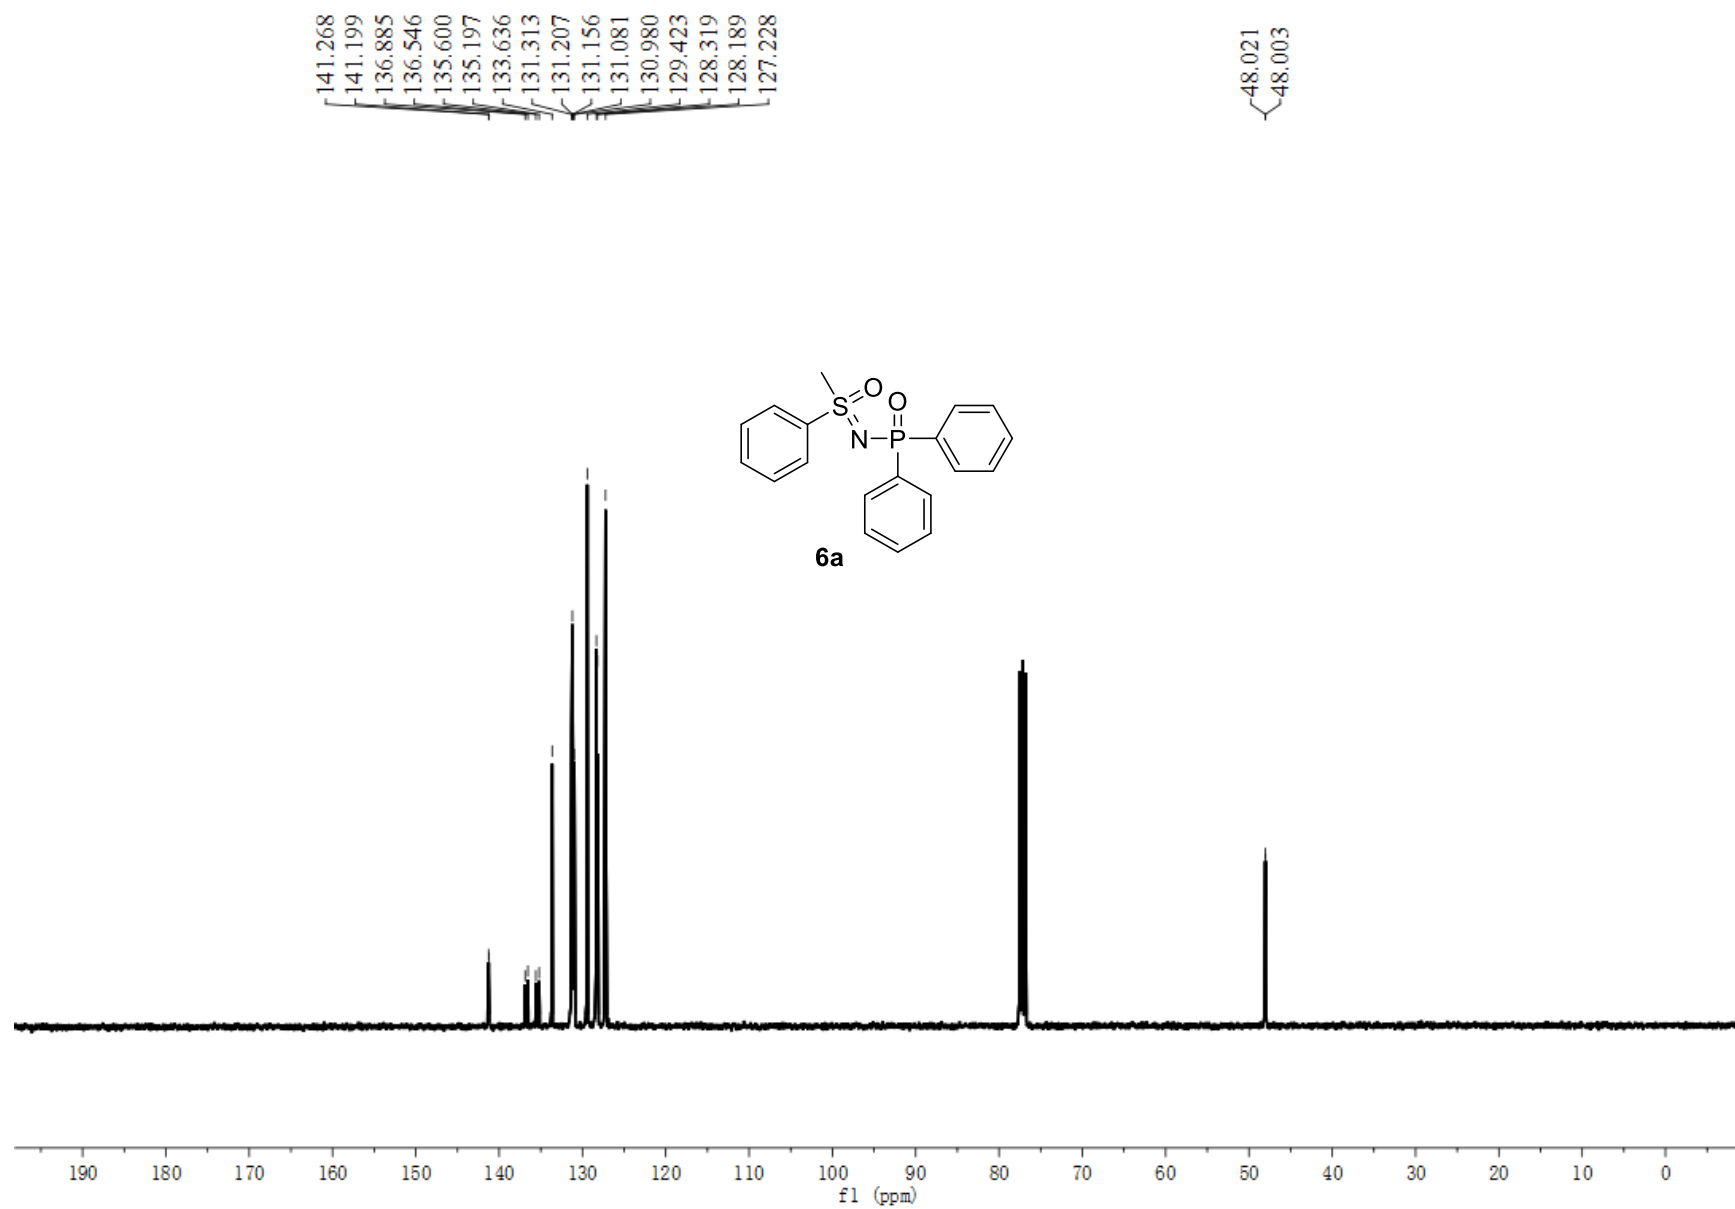

$^{31}\text{P}$  NMR spectra of compound **6a** (162 MHz,  $\text{CDCl}_3$ )

—18.205

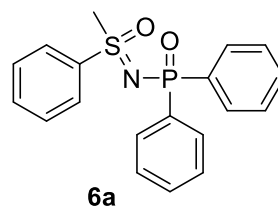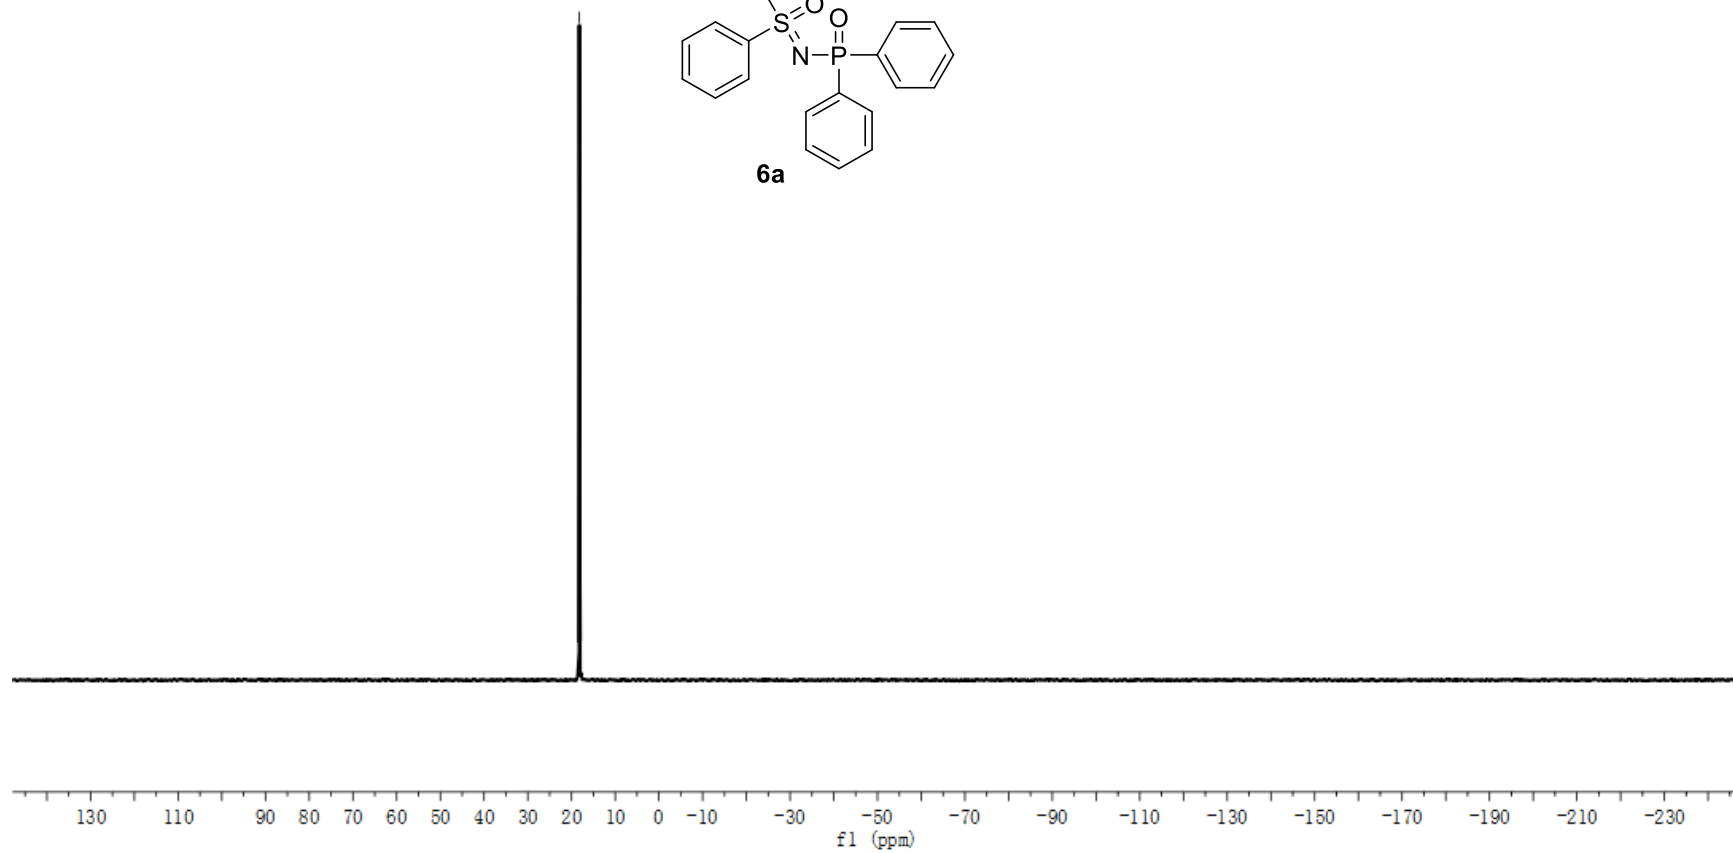

<sup>1</sup>H NMR spectra of compound **6b** (400 MHz, CDCl<sub>3</sub>)

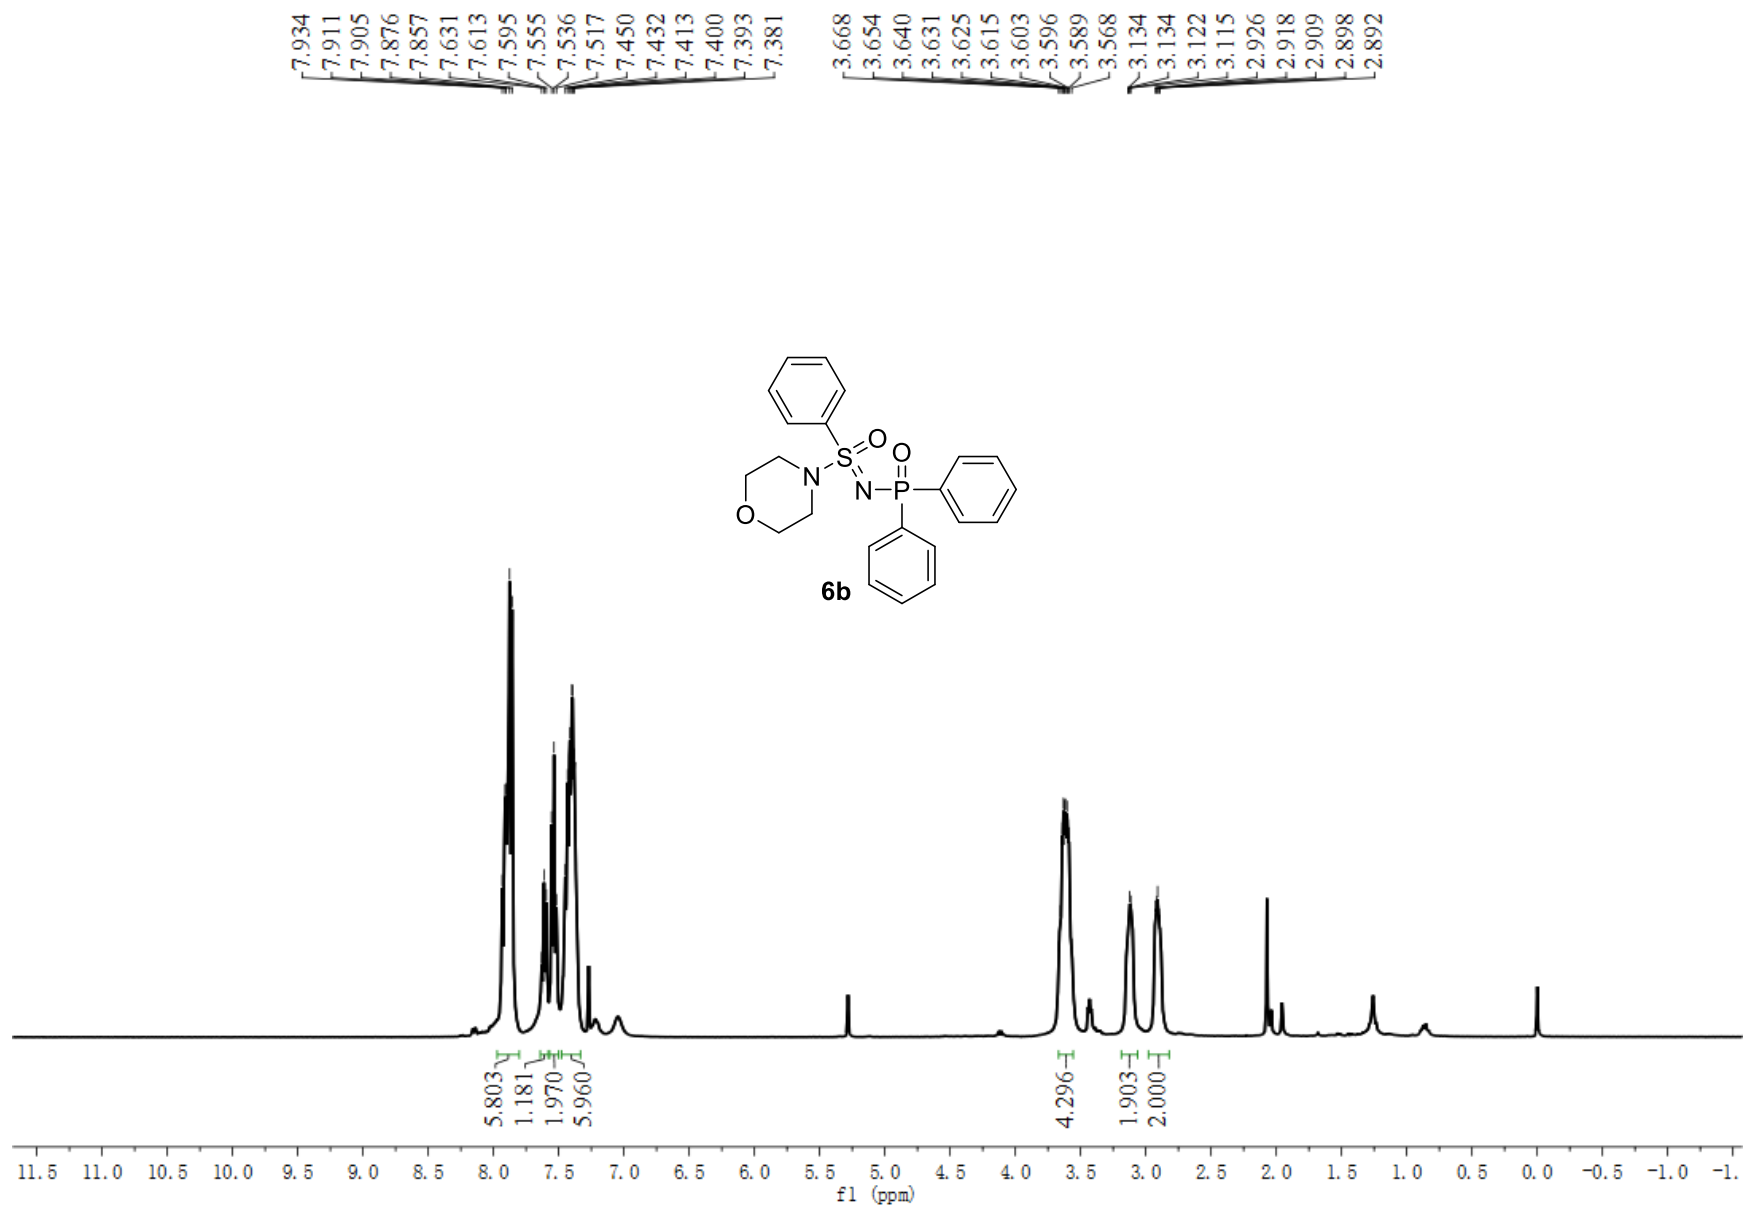

$^{13}\text{C}$  NMR spectra of compound **6b** (101 MHz,  $\text{CDCl}_3$ )

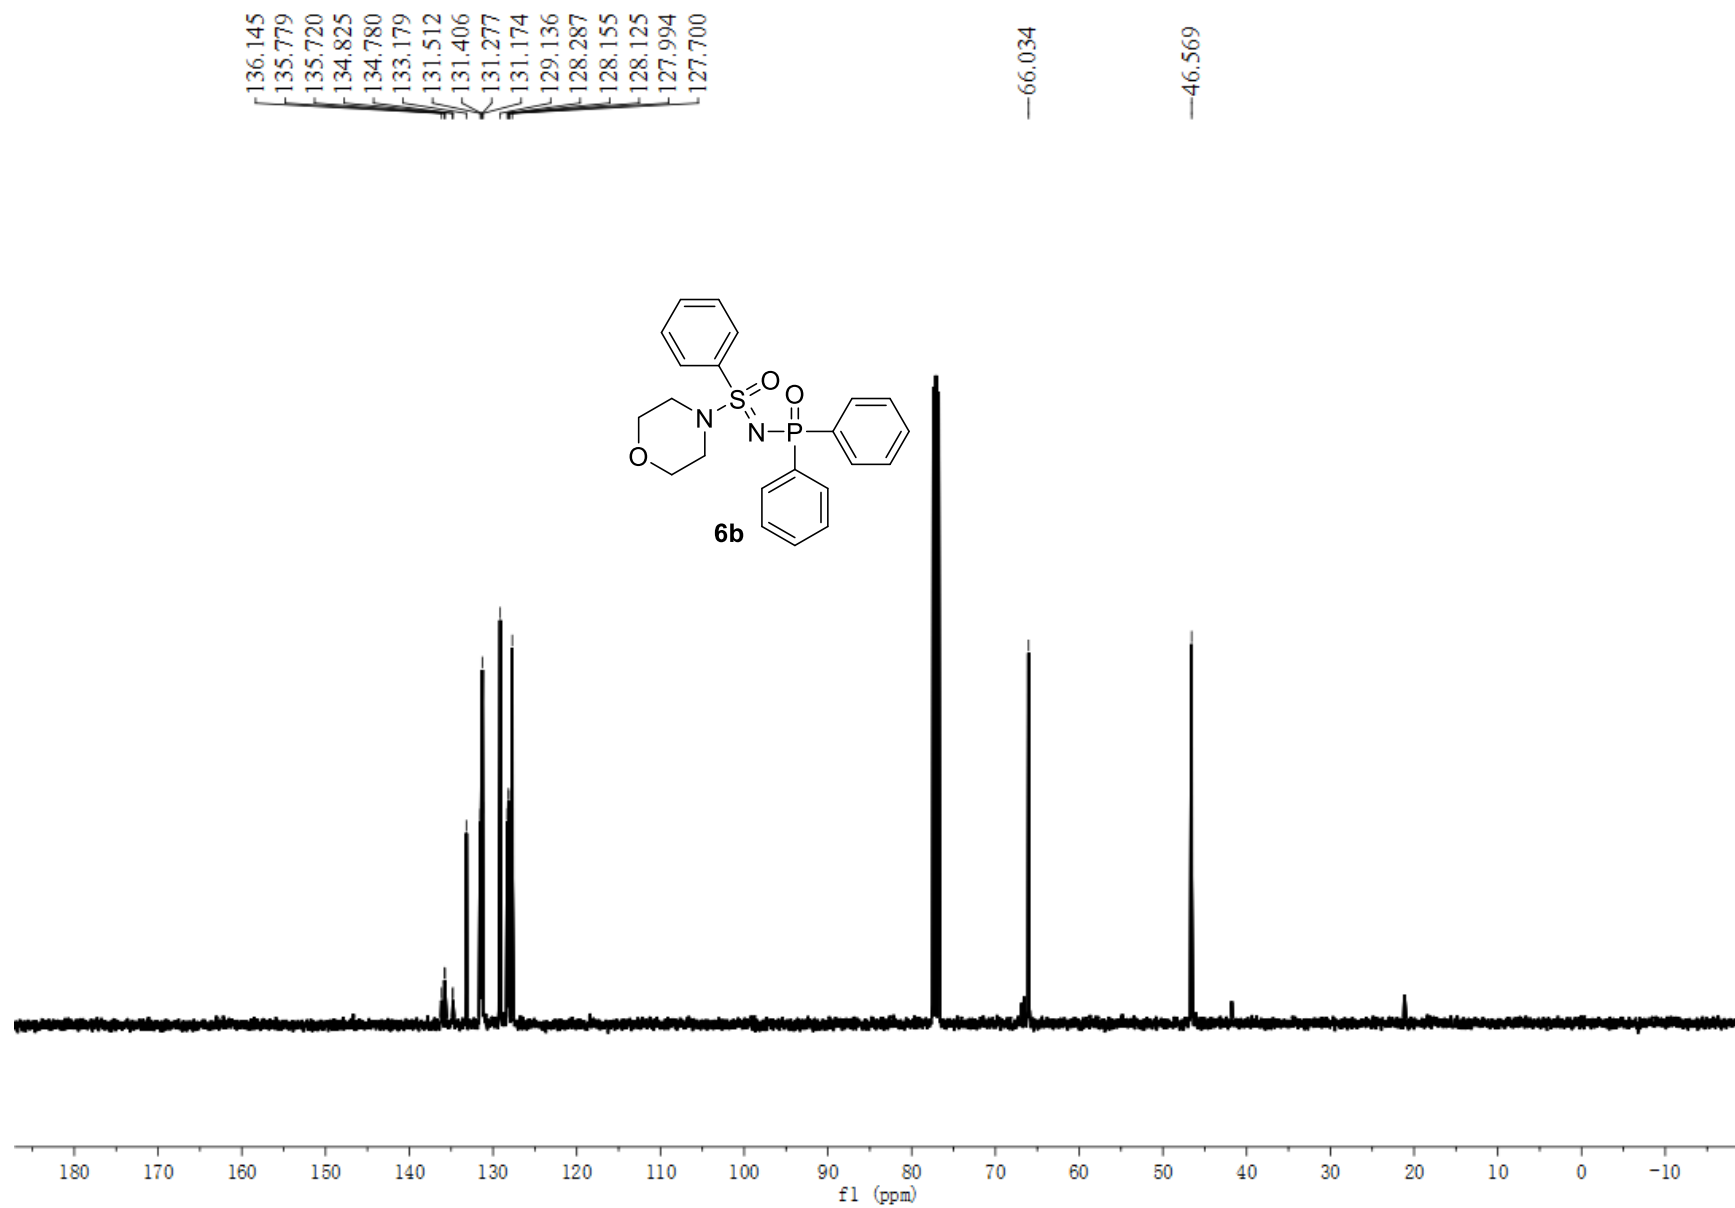

$^{31}\text{P}$  NMR spectra of compound **6b** (162 MHz,  $\text{CDCl}_3$ )

— 14.477

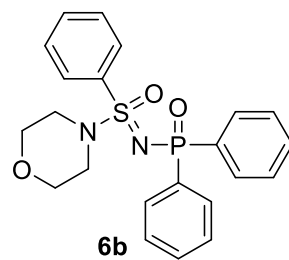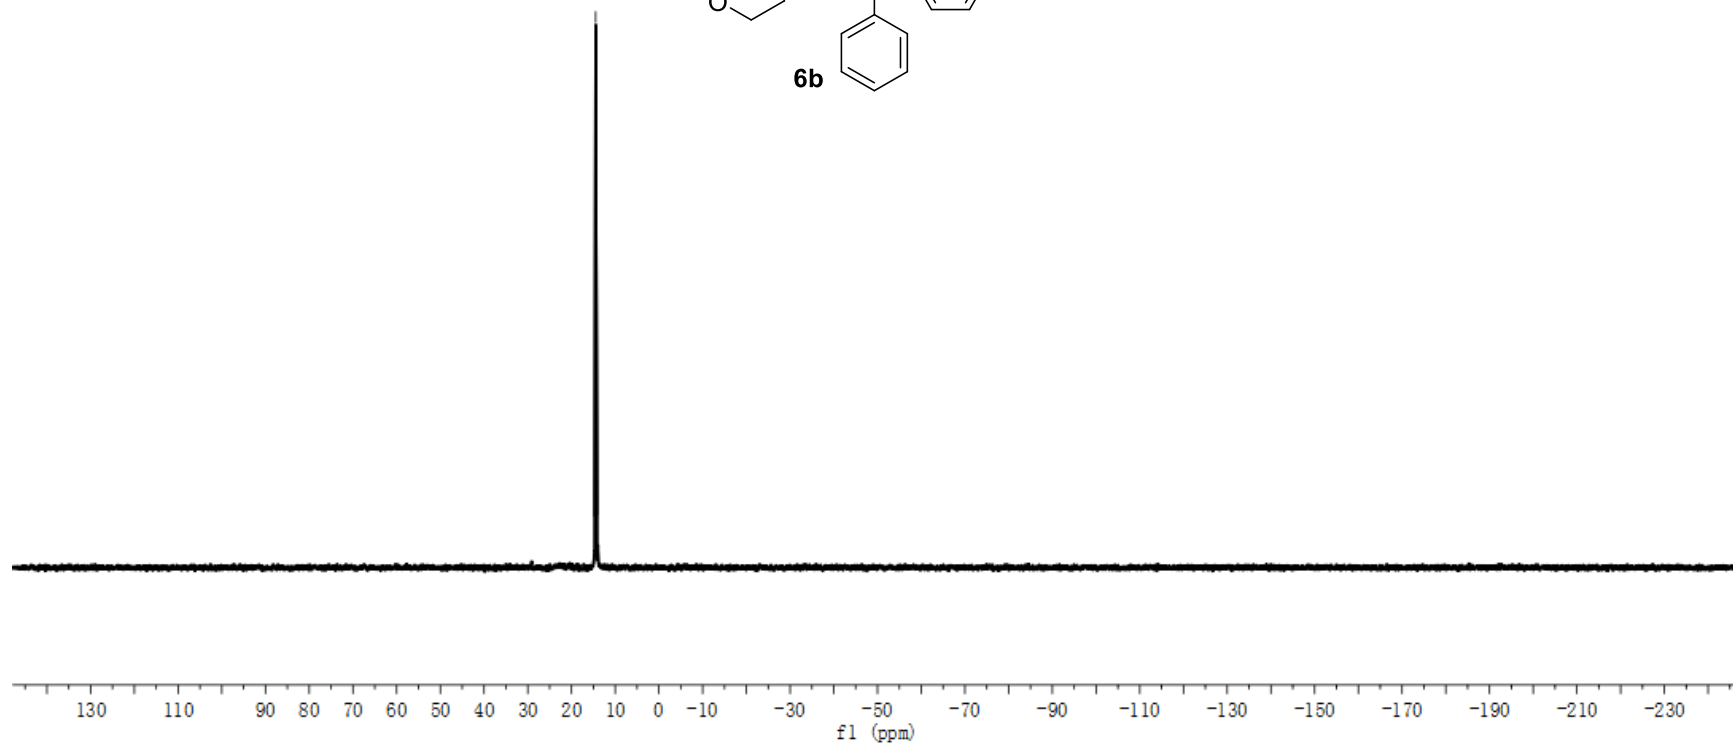

<sup>1</sup>H NMR spectra of compound **6c** (400 MHz, CDCl<sub>3</sub>)

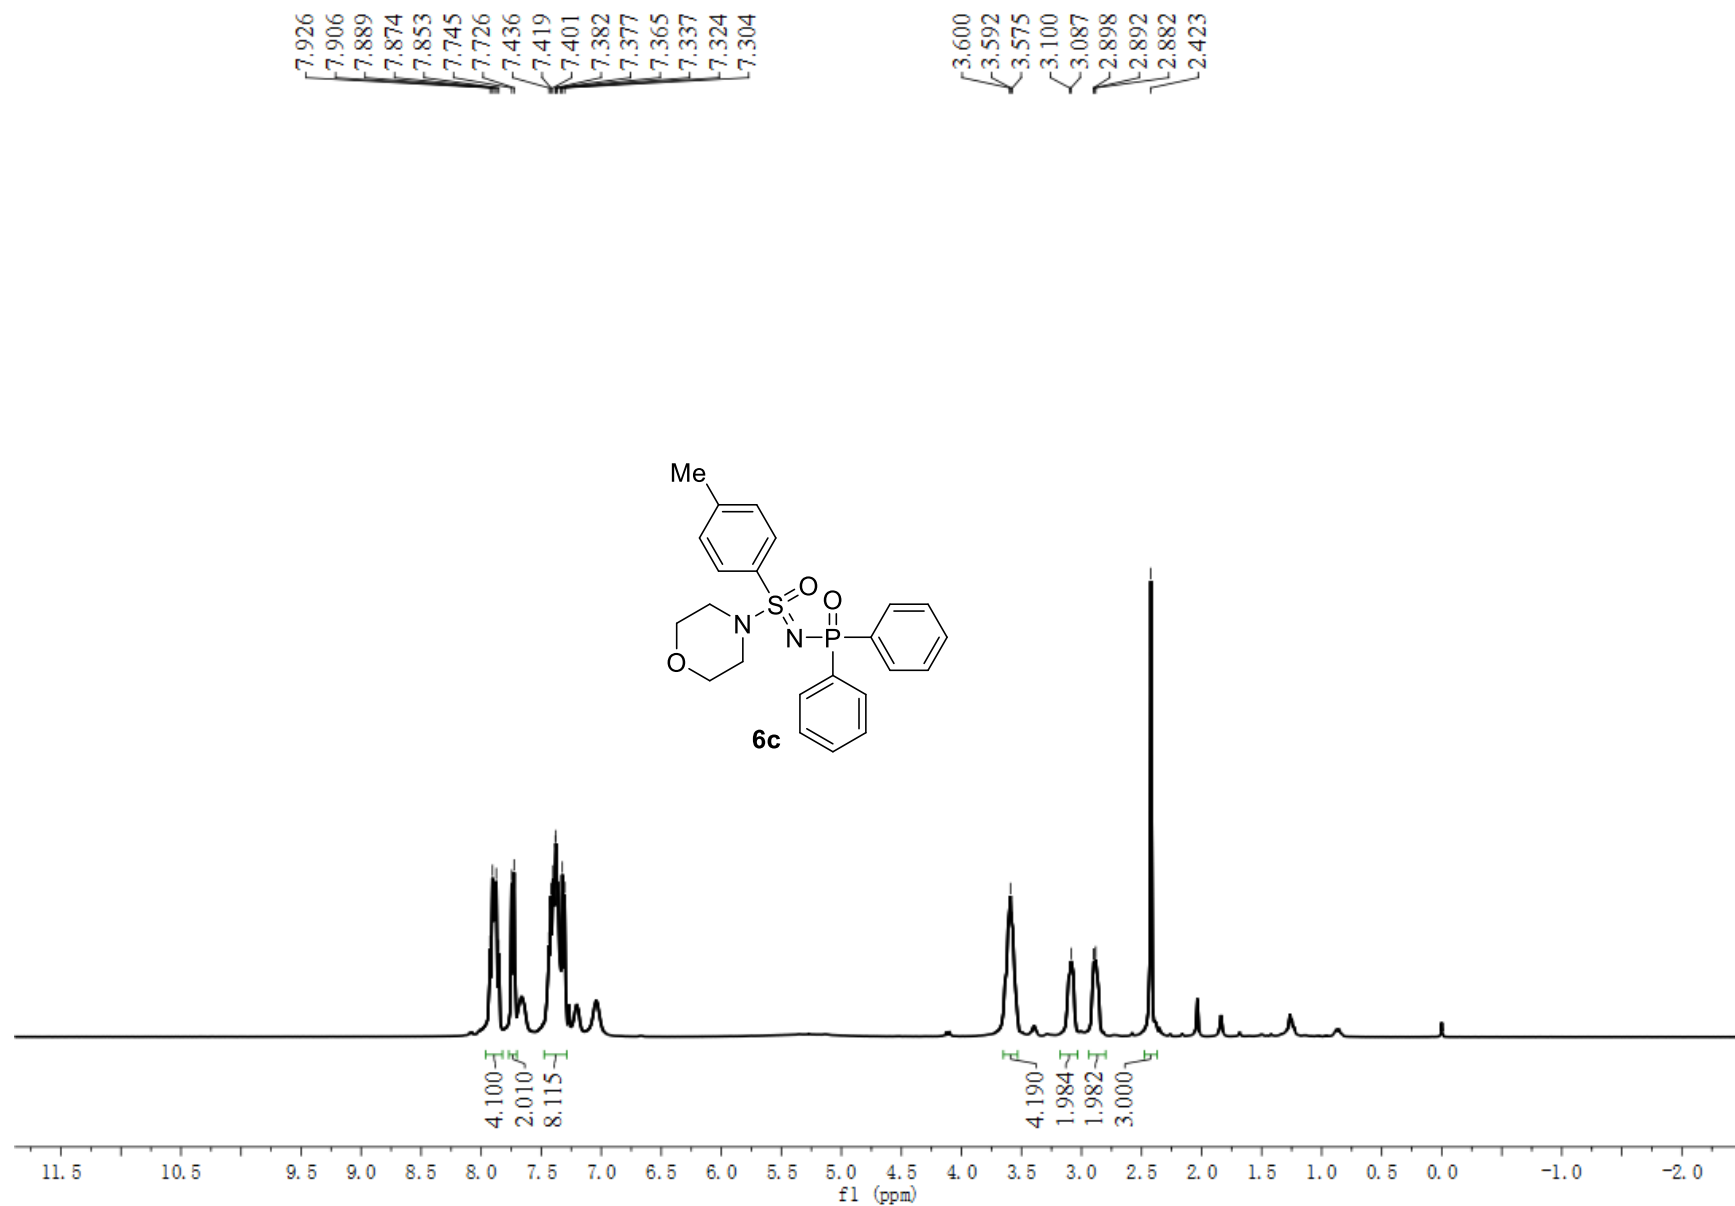

$^{13}\text{C}$  NMR spectra of compound **6c** (101 MHz,  $\text{CDCl}_3$ )

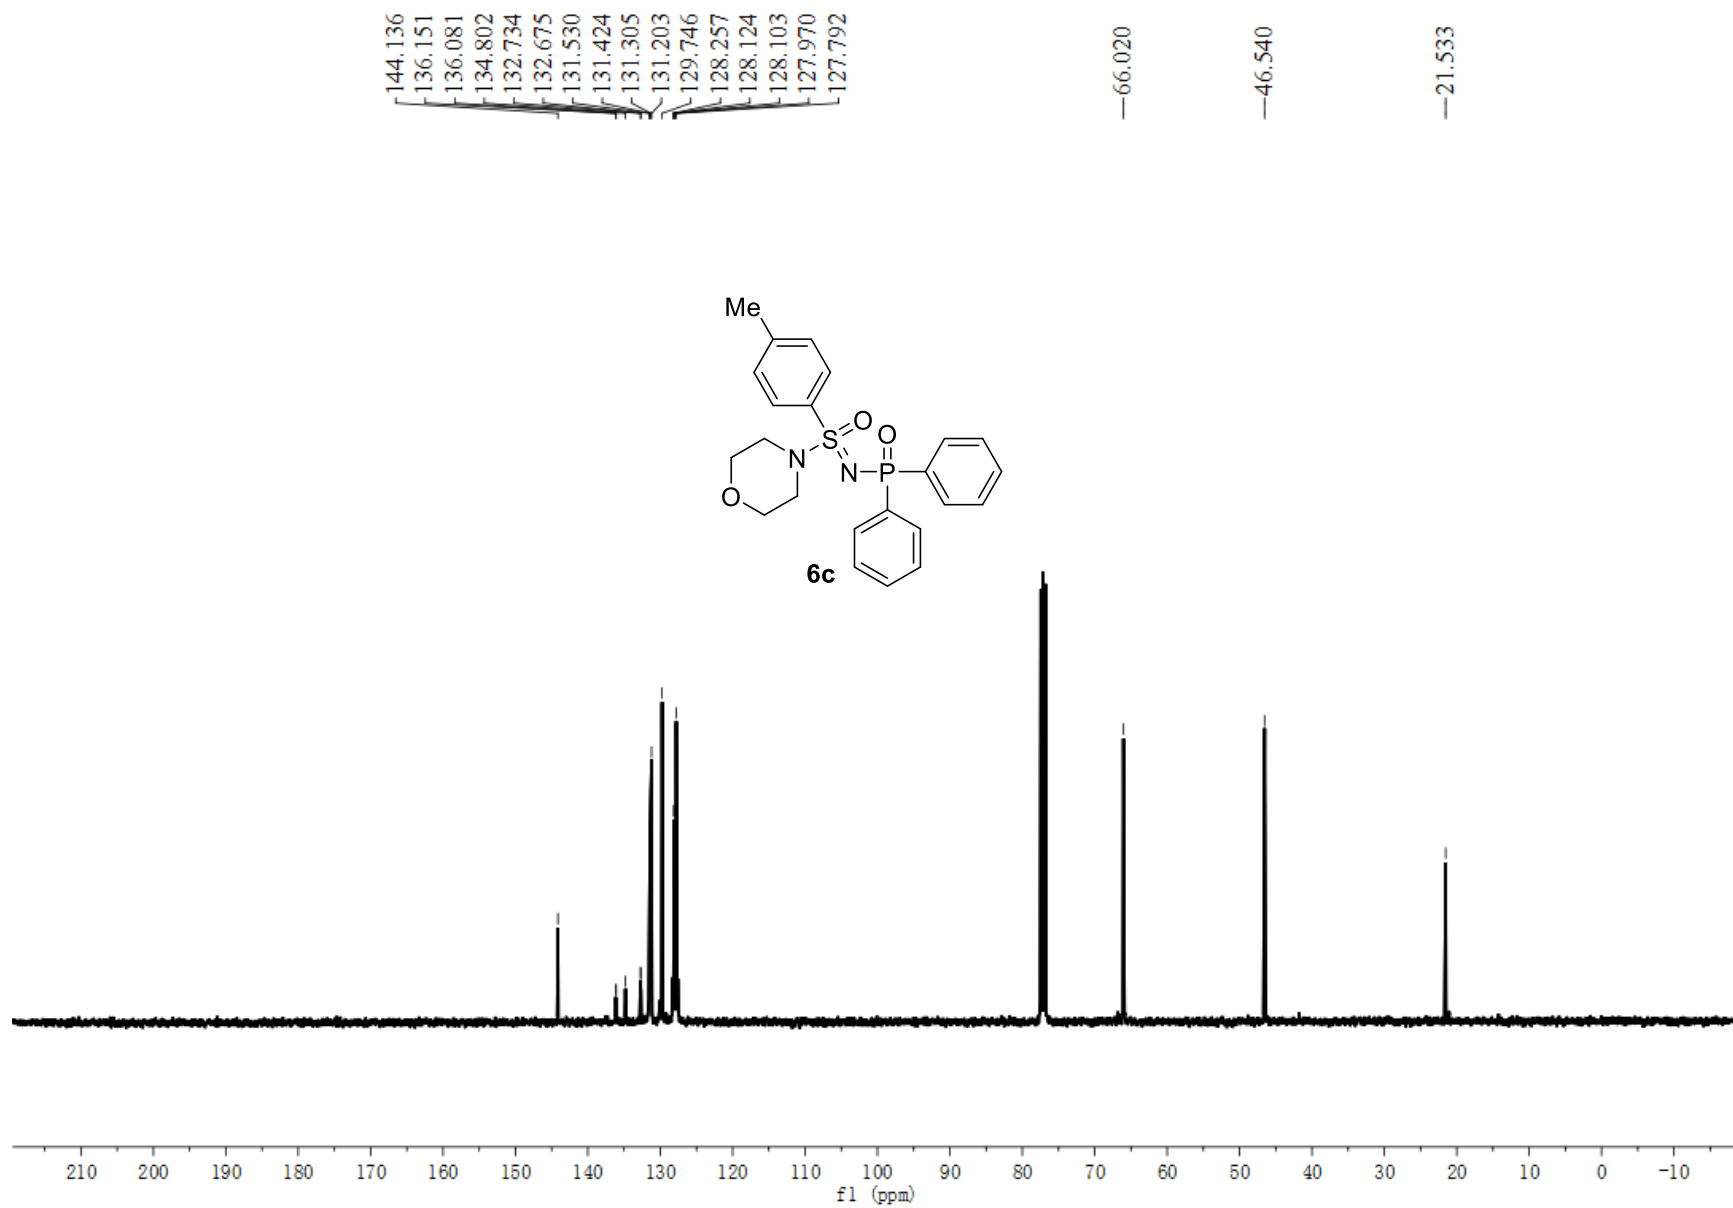

$^{31}\text{P}$  NMR spectra of compound **6c** (162 MHz,  $\text{CDCl}_3$ )

— 14.424

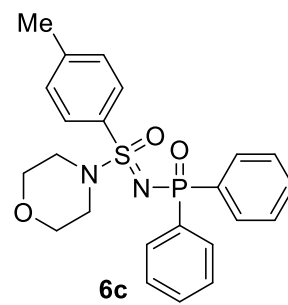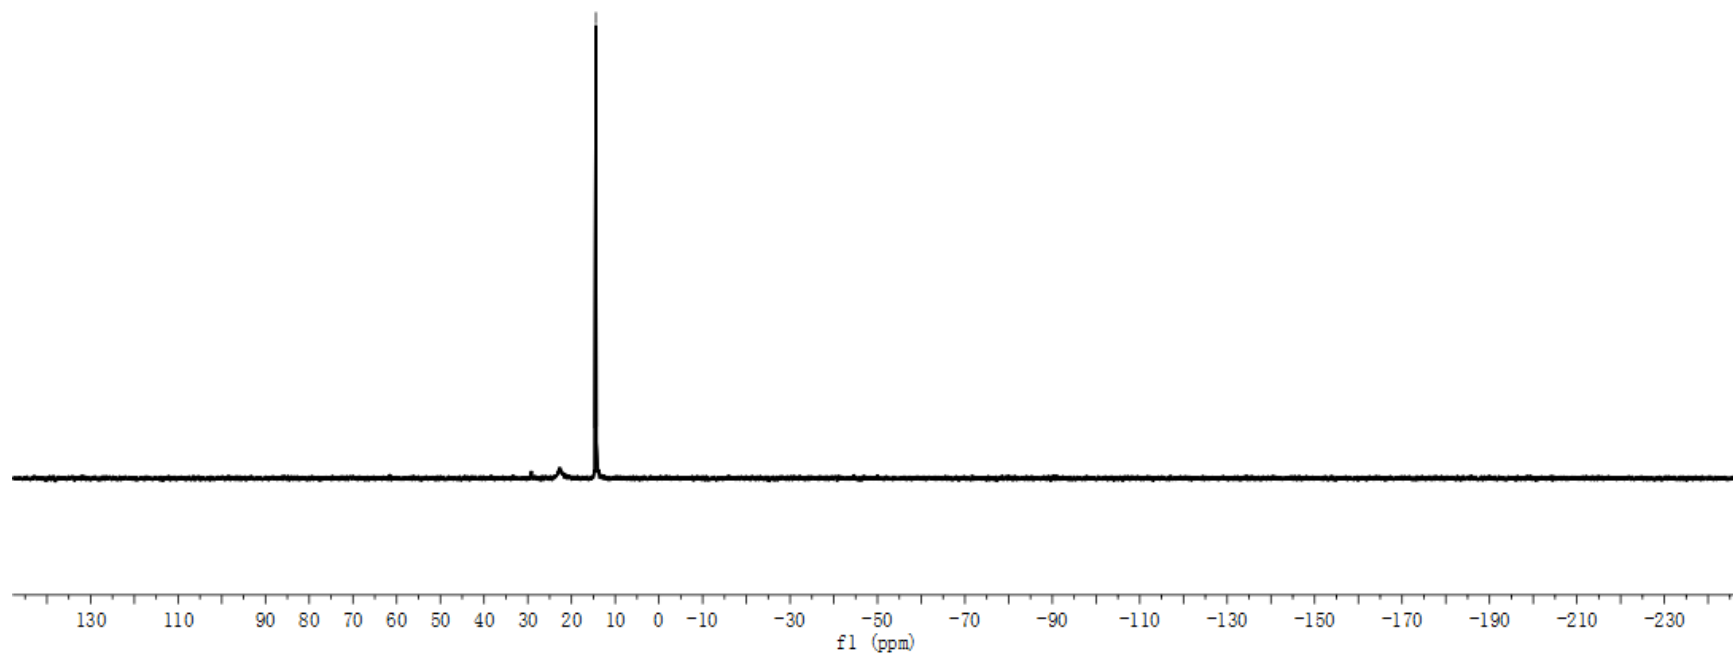

<sup>1</sup>H NMR spectra of compound **6d** (400 MHz, CDCl<sub>3</sub>)

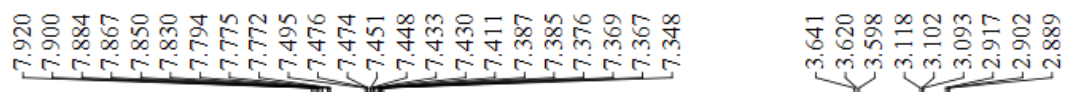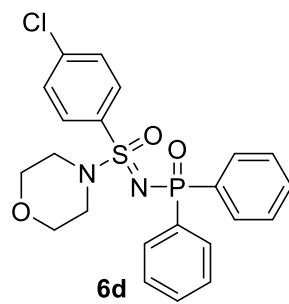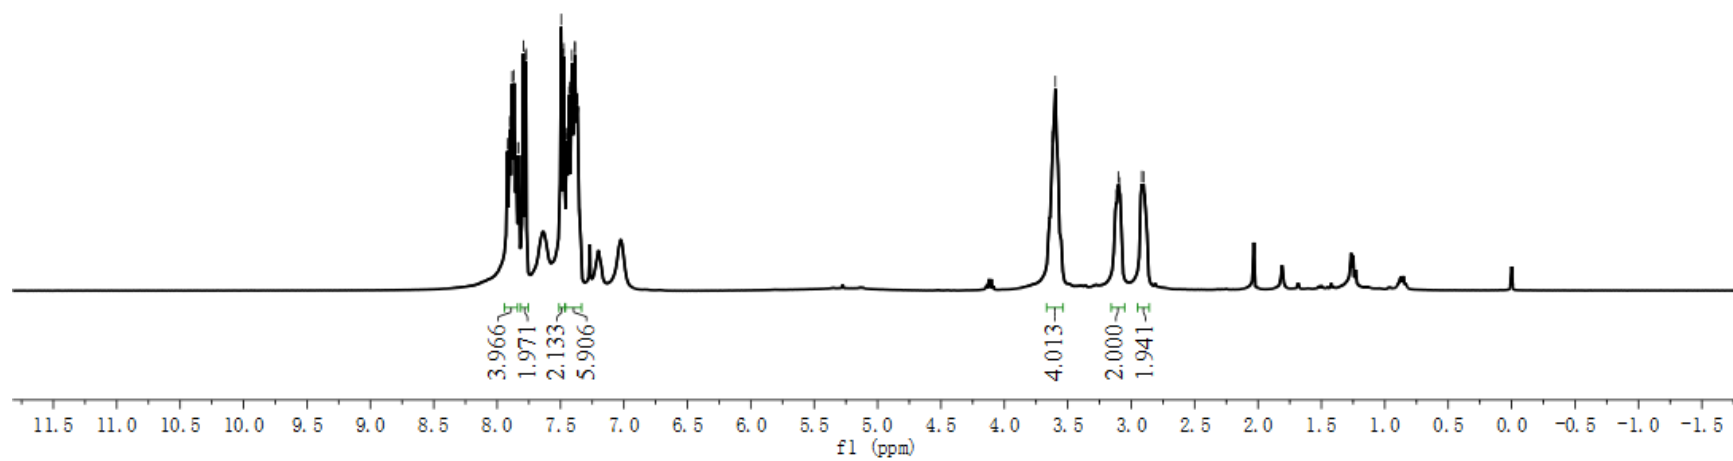

$^{13}\text{C}$  NMR spectra of compound **6d** (101 MHz,  $\text{CDCl}_3$ )

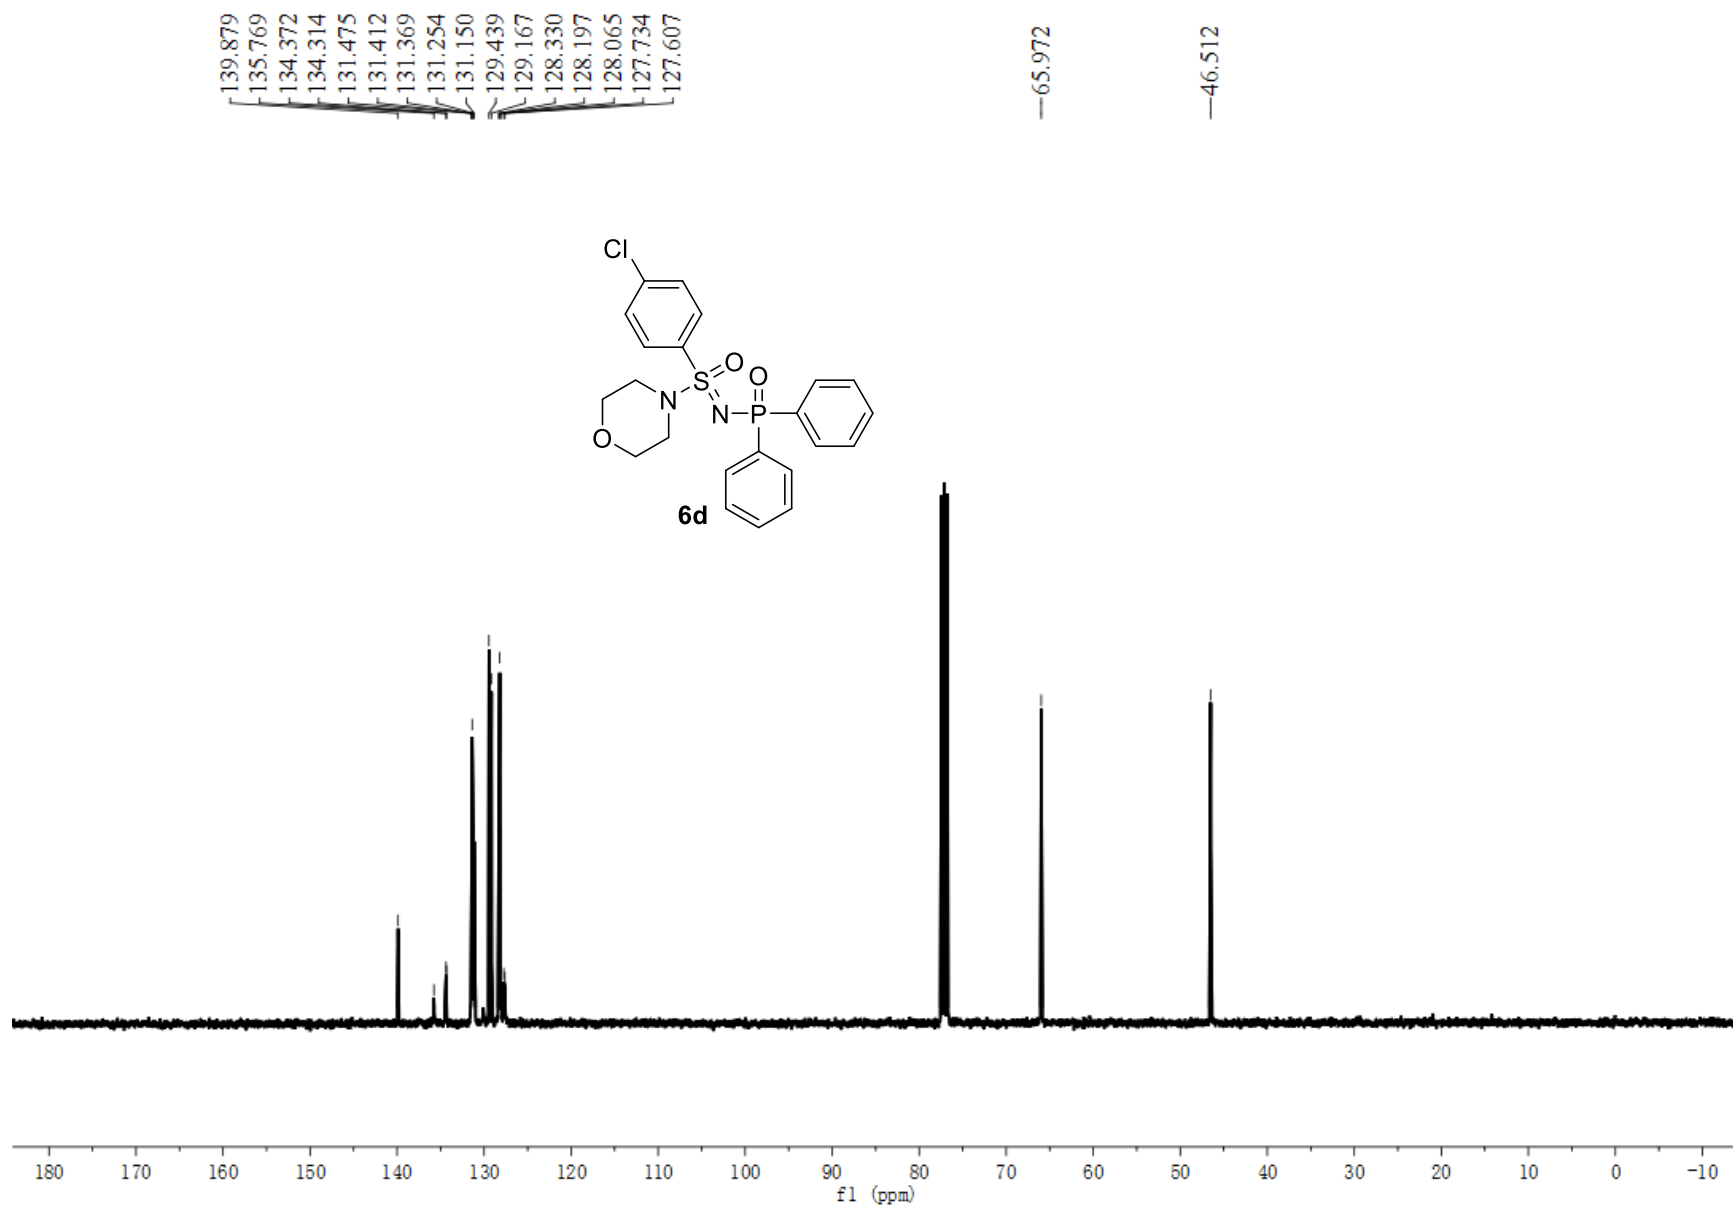

$^{31}\text{P}$  NMR spectra of compound **6d** (162 MHz,  $\text{CDCl}_3$ )

— 14.713

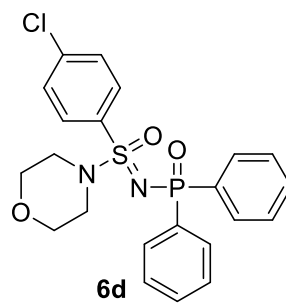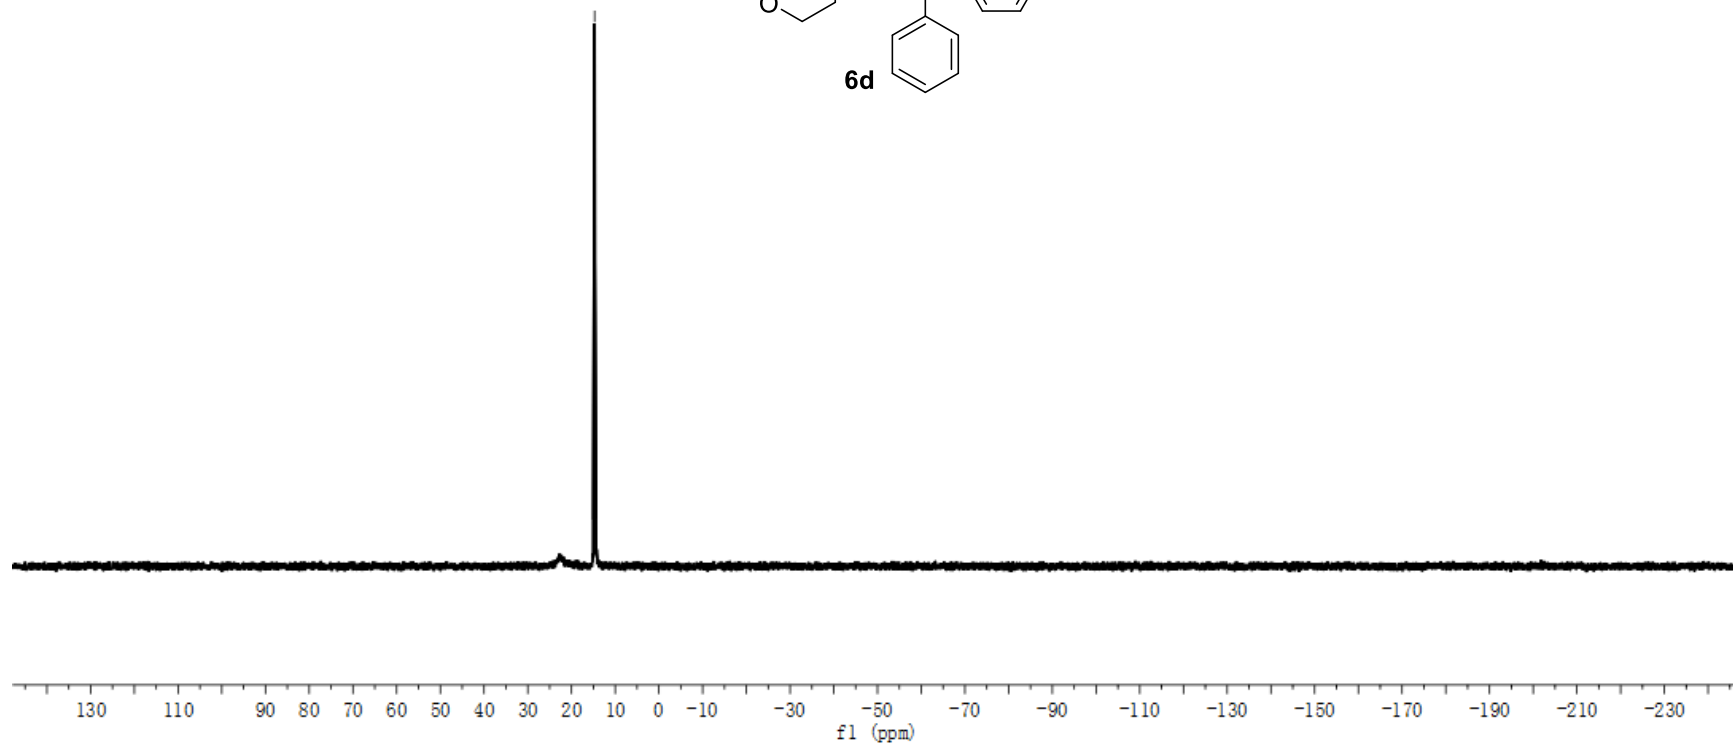

<sup>1</sup>H NMR spectra of compound **6e** (400 MHz, CDCl<sub>3</sub>)

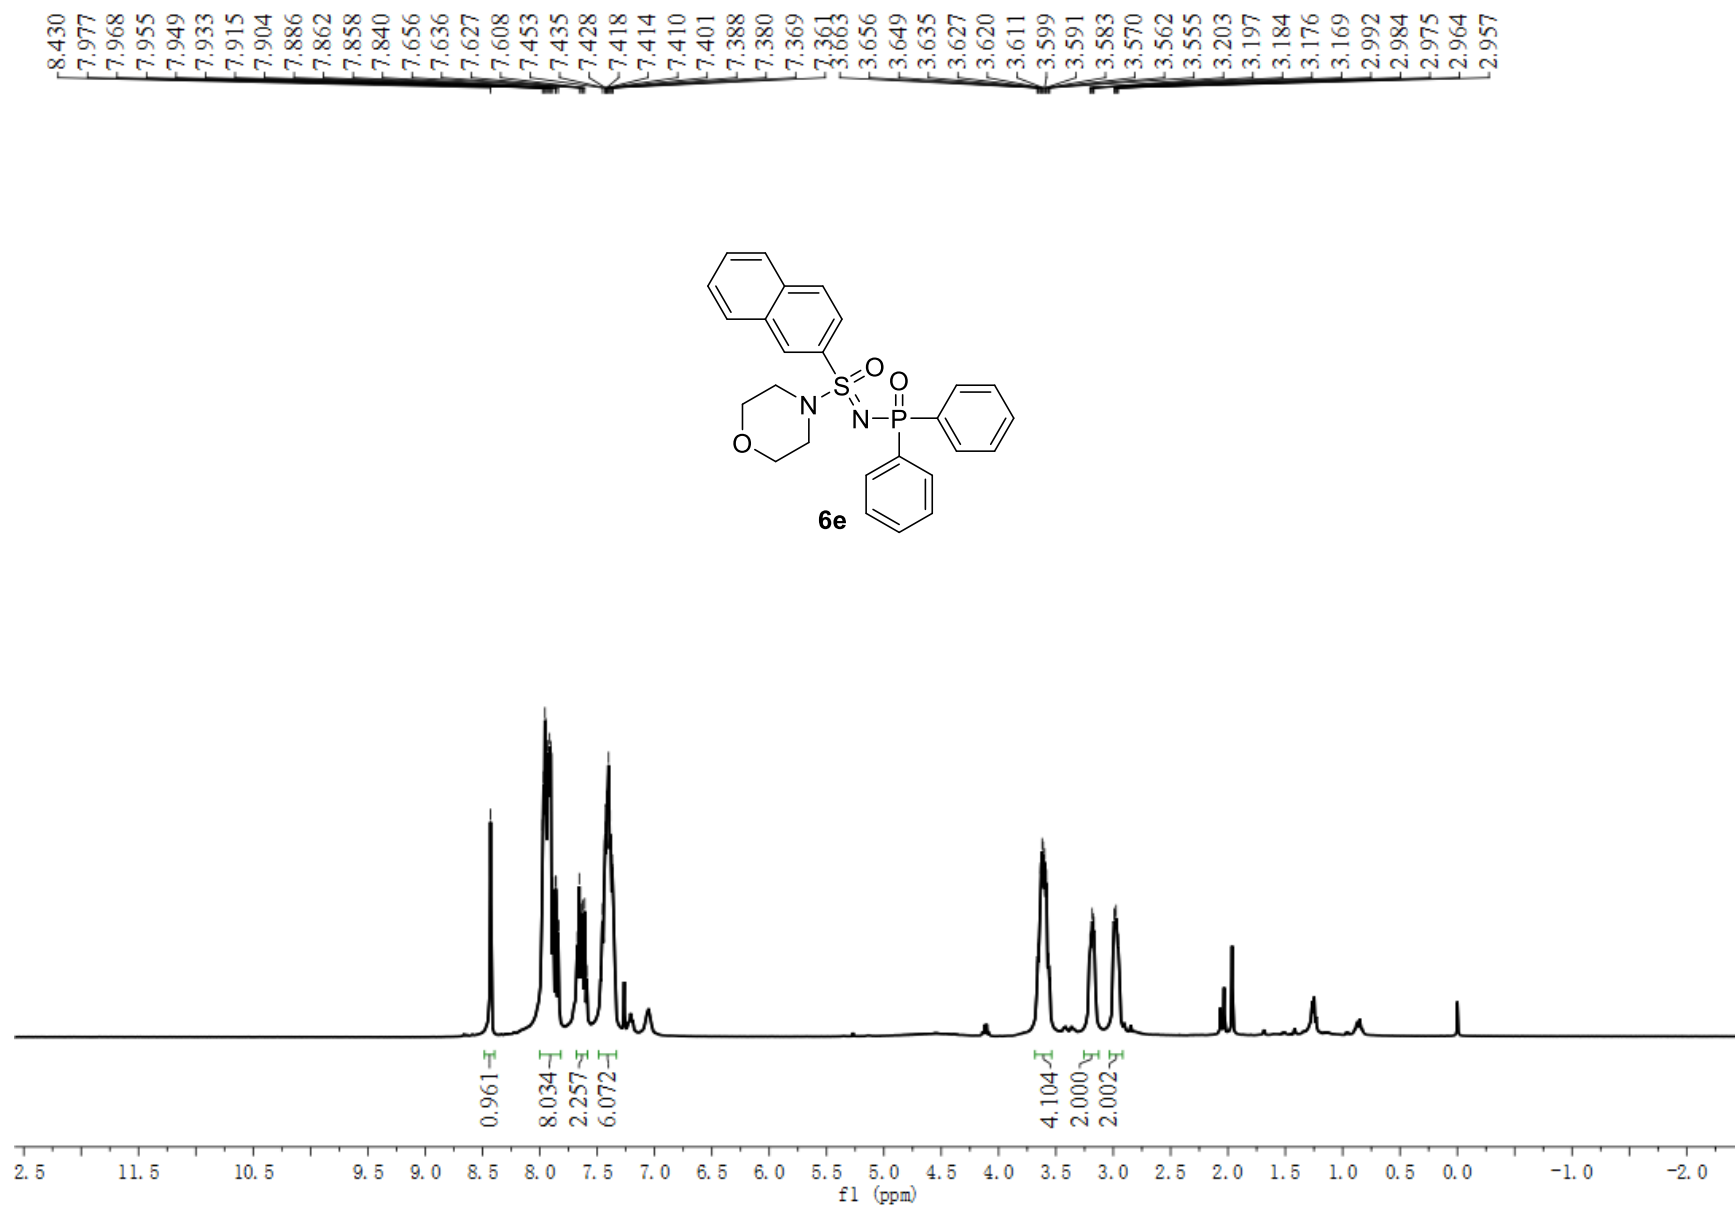

<sup>13</sup>C NMR spectra of compound **6e** (101 MHz, CDCl<sub>3</sub>)

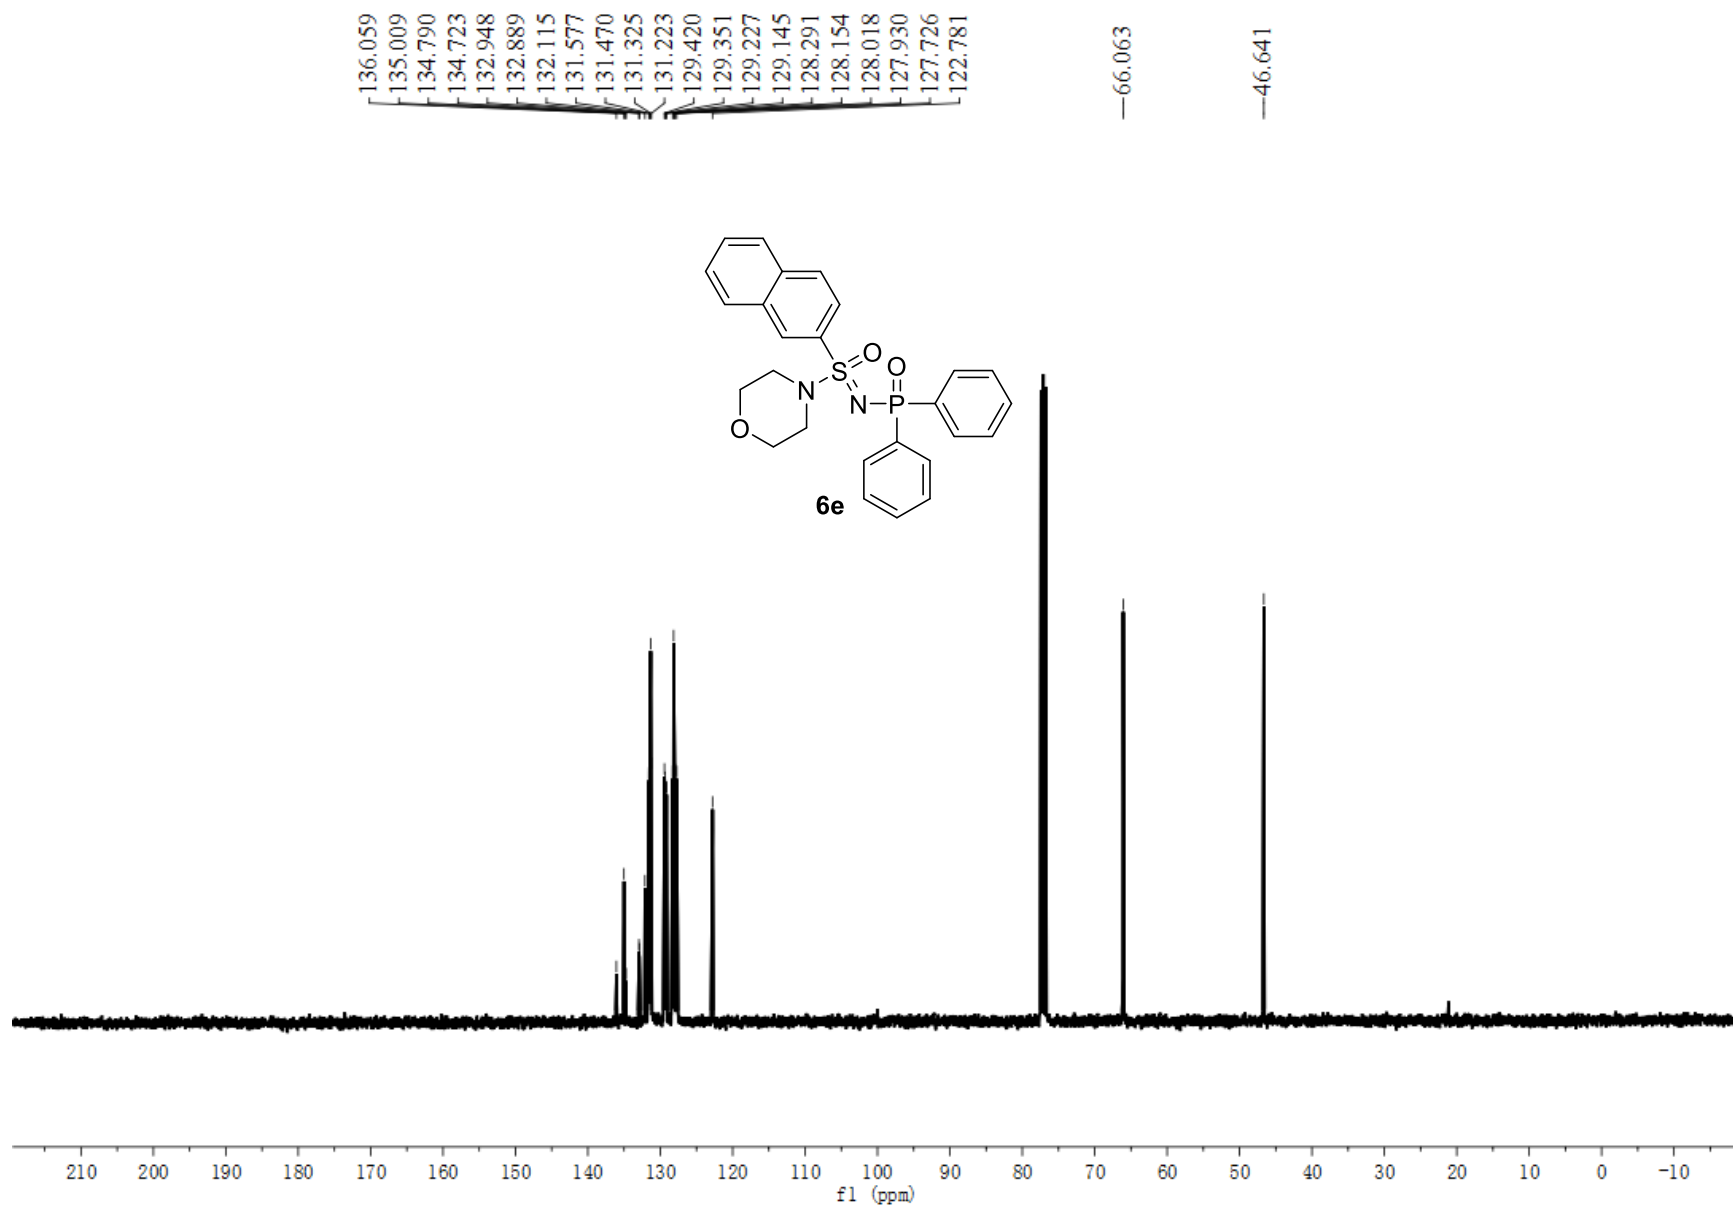

$^{31}\text{P}$  NMR spectra of compound **6e** (162 MHz,  $\text{CDCl}_3$ )

— 14,560

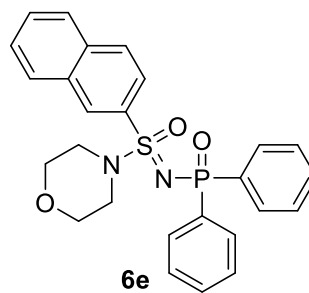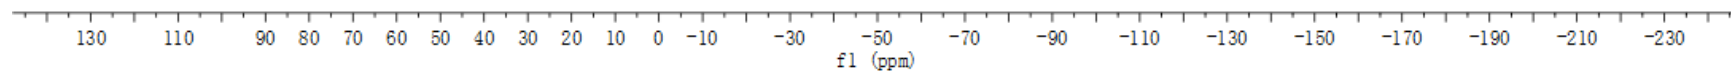

<sup>1</sup>H NMR spectra of compound **6f** (400 MHz, CDCl<sub>3</sub>)

7.945  
7.925  
7.898  
7.882  
7.867  
7.847  
7.581  
7.563  
7.546  
7.510  
7.492  
7.473  
7.409  
7.392  
7.376  
7.360  
3.324  
3.308  
3.188  
3.173  
—1.679

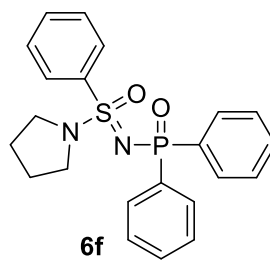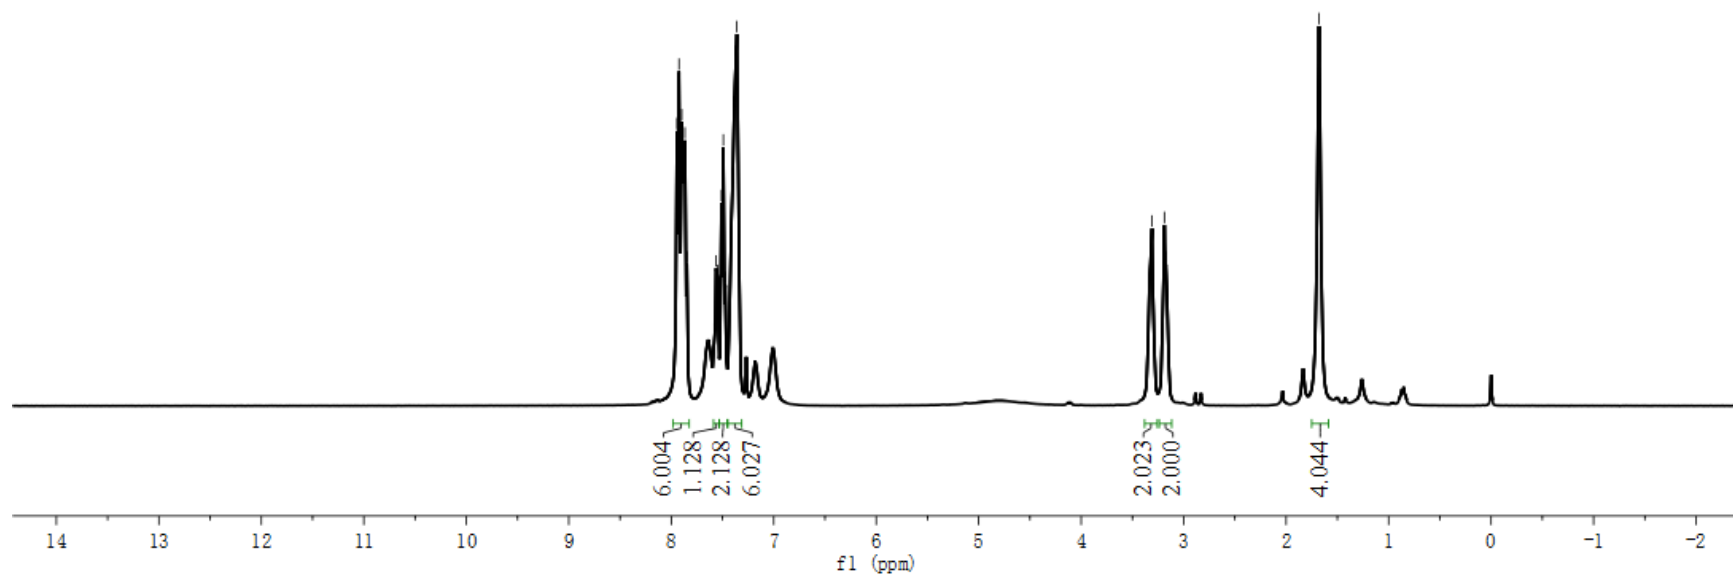

$^{13}\text{C}$  NMR spectra of compound **6f** (101 MHz,  $\text{CDCl}_3$ )

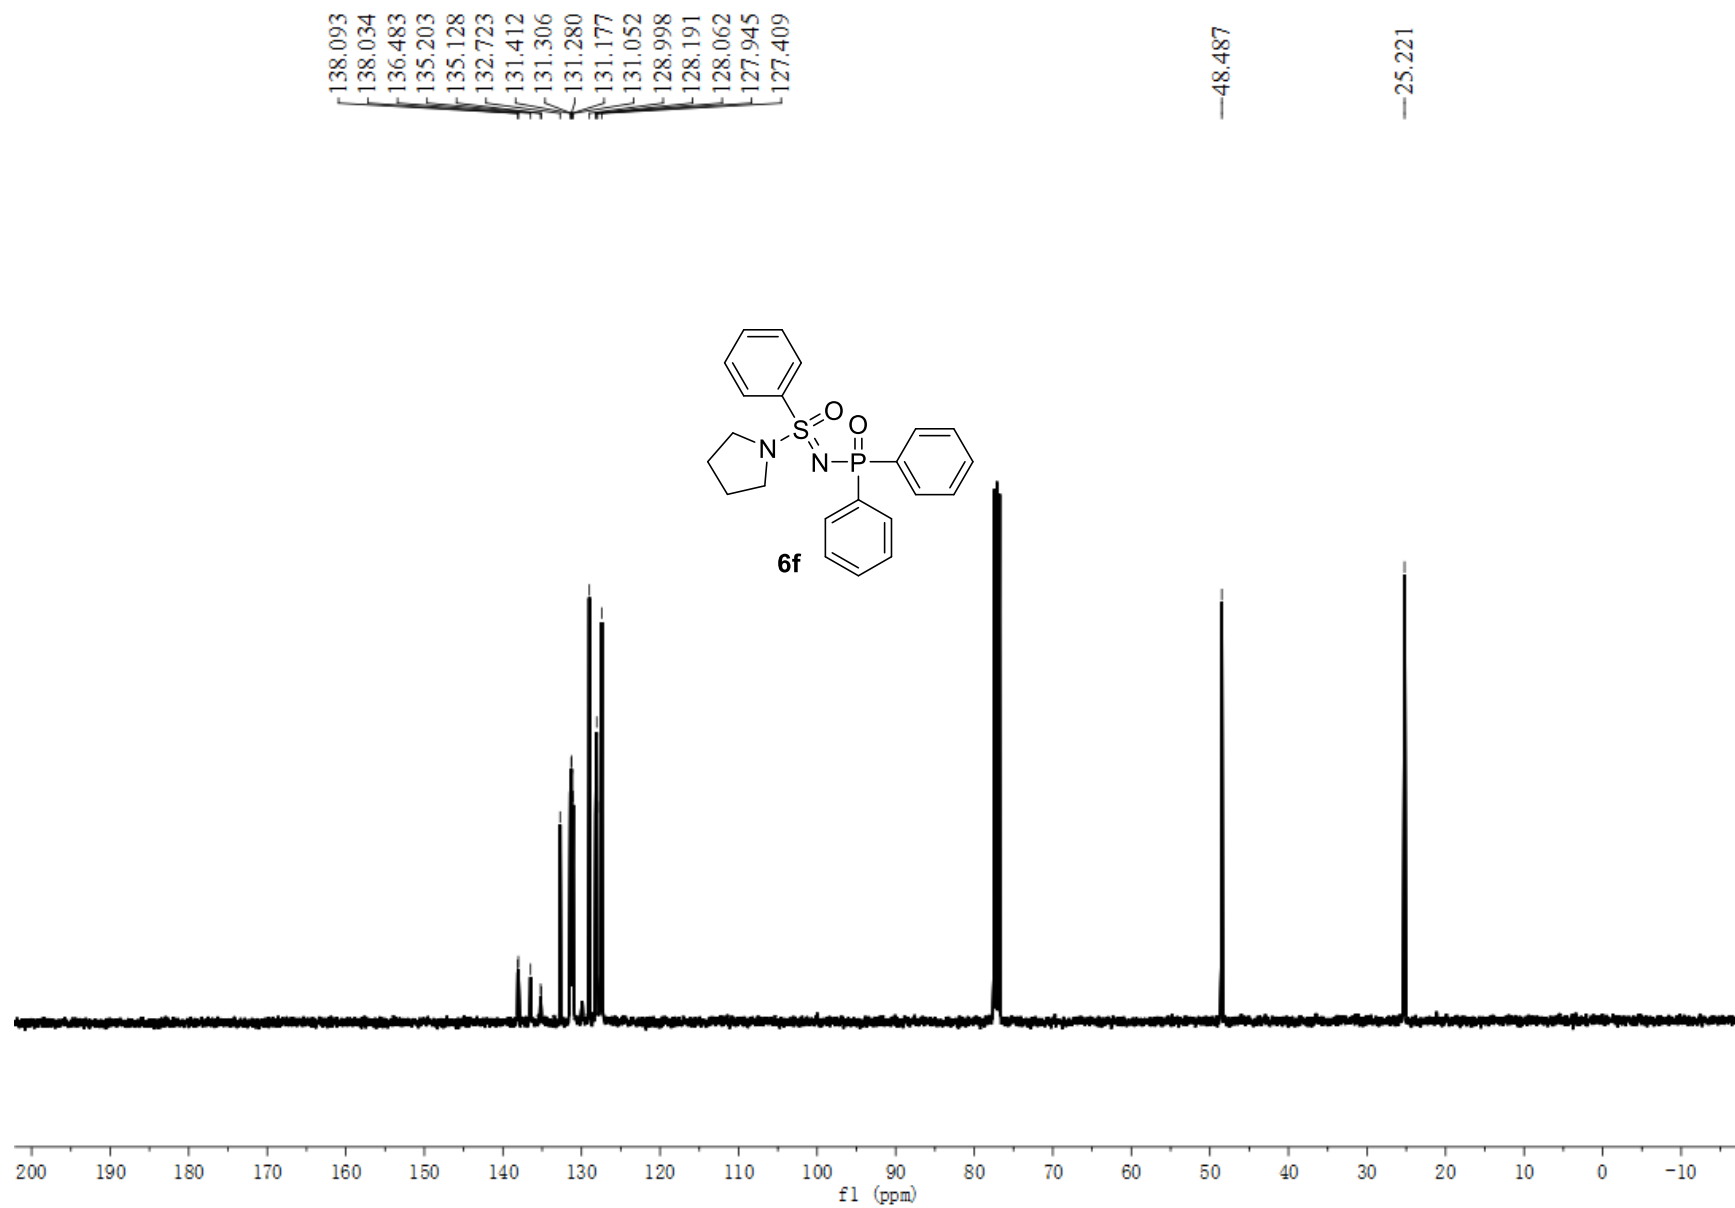

$^{31}\text{P}$  NMR spectra of compound **6f** (162 MHz,  $\text{CDCl}_3$ )

—14.193

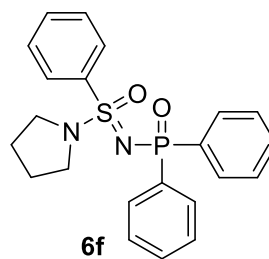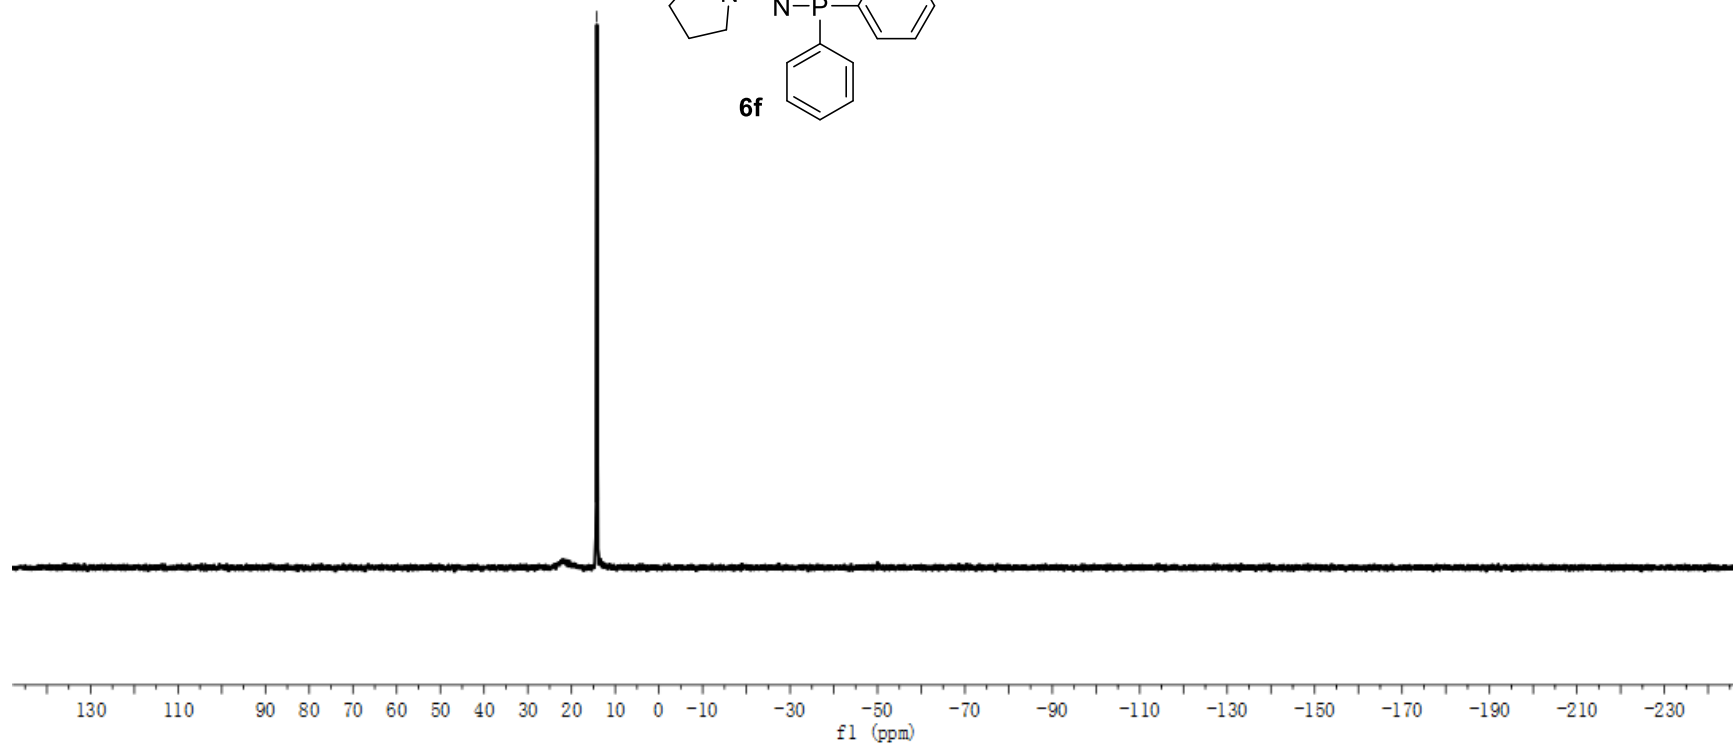

<sup>1</sup>H NMR spectra of compound **6g** (400 MHz, CDCl<sub>3</sub>)

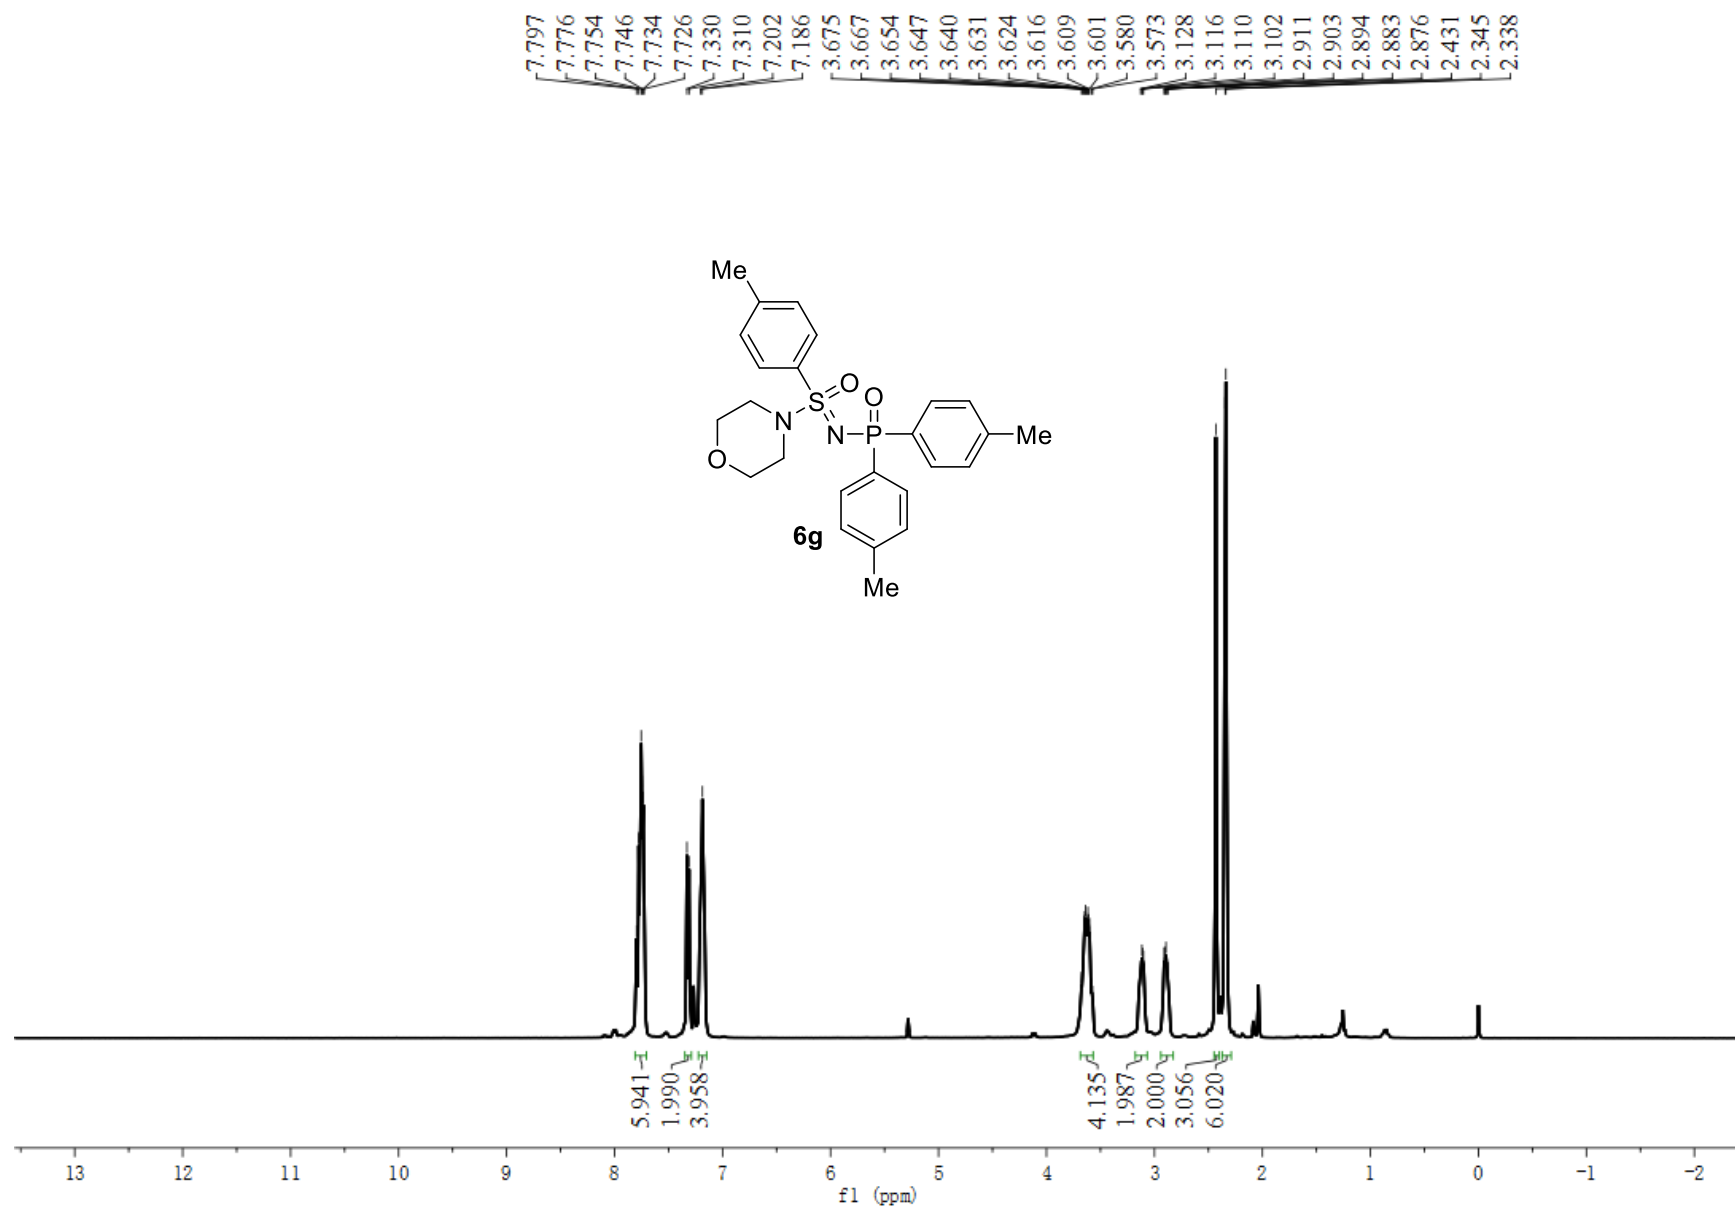

$^{13}\text{C}$  NMR spectra of compound **6g** (101 MHz,  $\text{CDCl}_3$ )

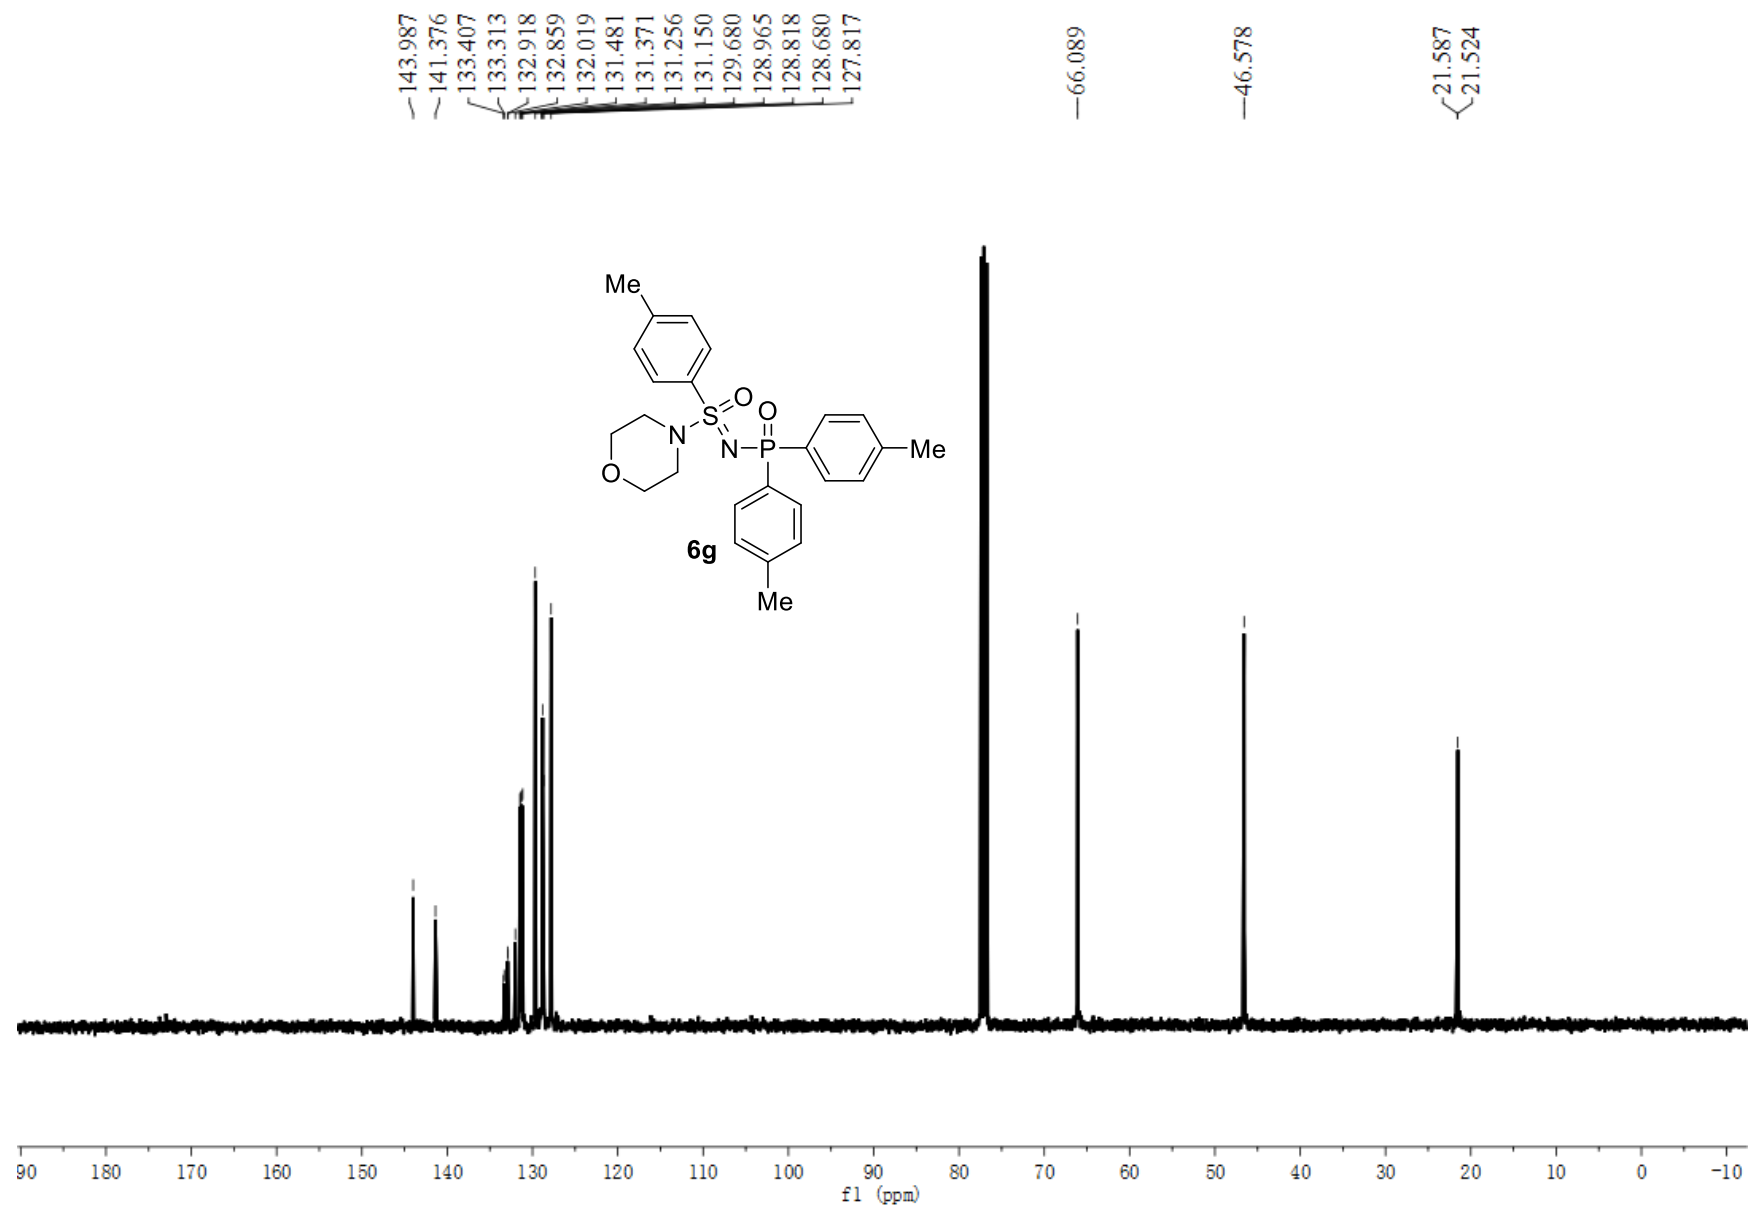

$^{31}\text{P}$  NMR spectra of compound **6g** (162 MHz,  $\text{CDCl}_3$ )

— 14.933

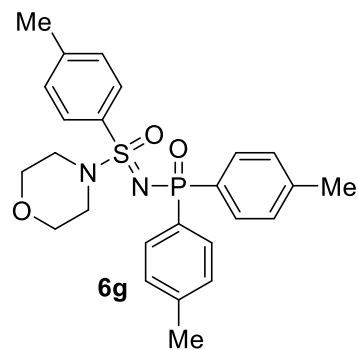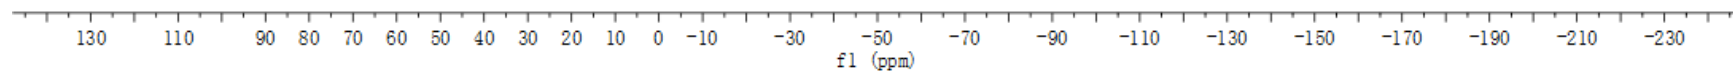

<sup>1</sup>H NMR spectra of compound **6h** (400 MHz, CDCl<sub>3</sub>)

7.837, 7.809, 7.787, 7.756, 7.753, 7.732, 7.334, 7.315, 6.919, 6.897, 6.875, 3.801, 3.790, 3.680, 3.659, 3.651, 3.643, 3.635, 3.624, 3.617, 3.595, 3.588, 3.135, 3.118, 2.914, 2.907, 2.898, 2.886, 2.432

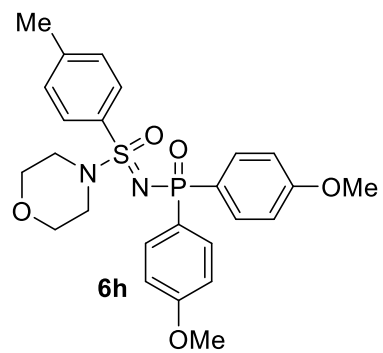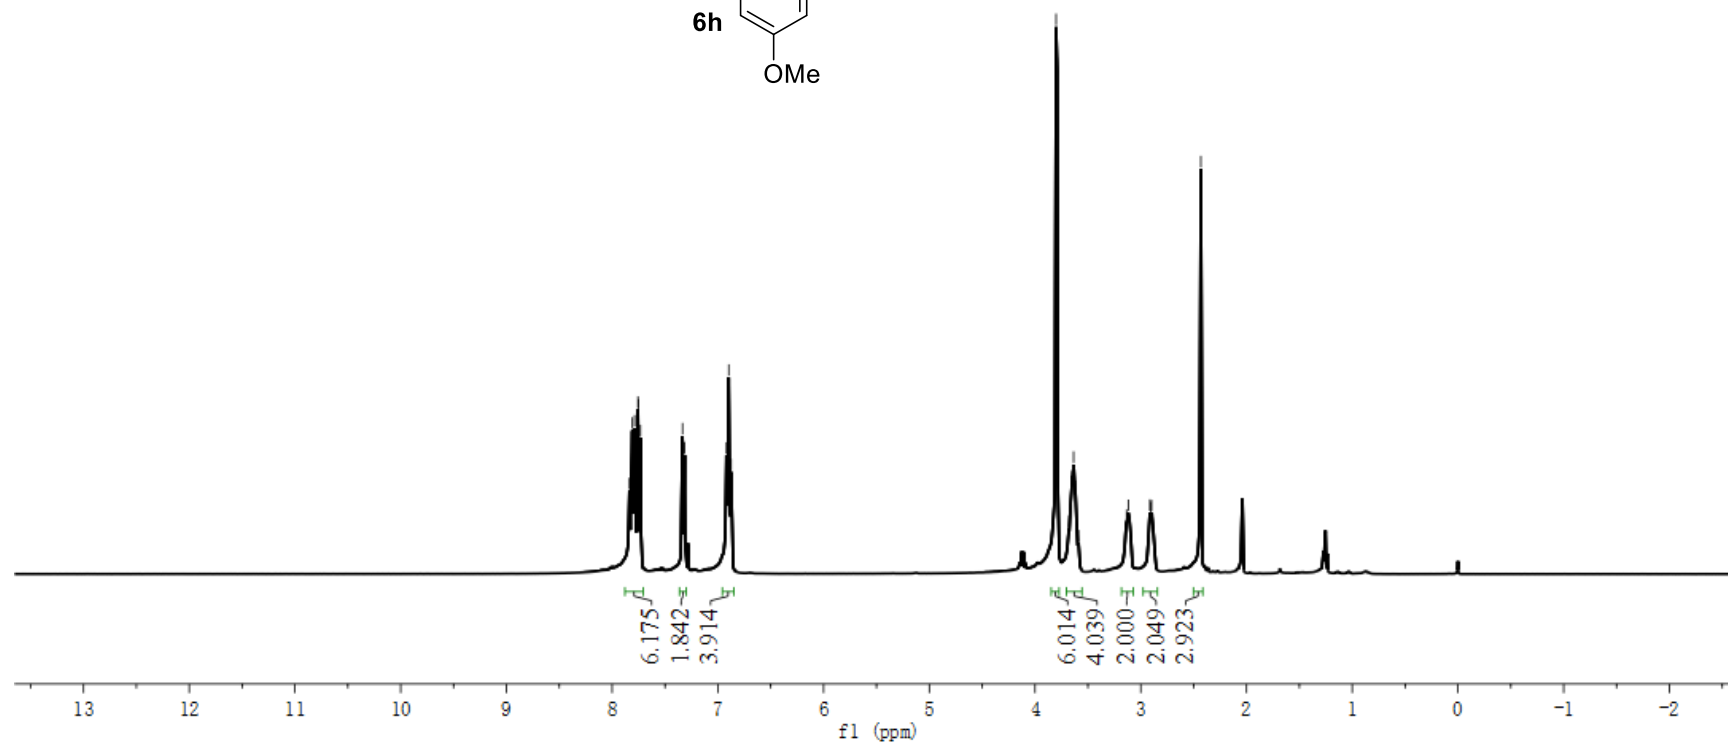

<sup>13</sup>C NMR spectra of compound **6h** (101 MHz, CDCl<sub>3</sub>)

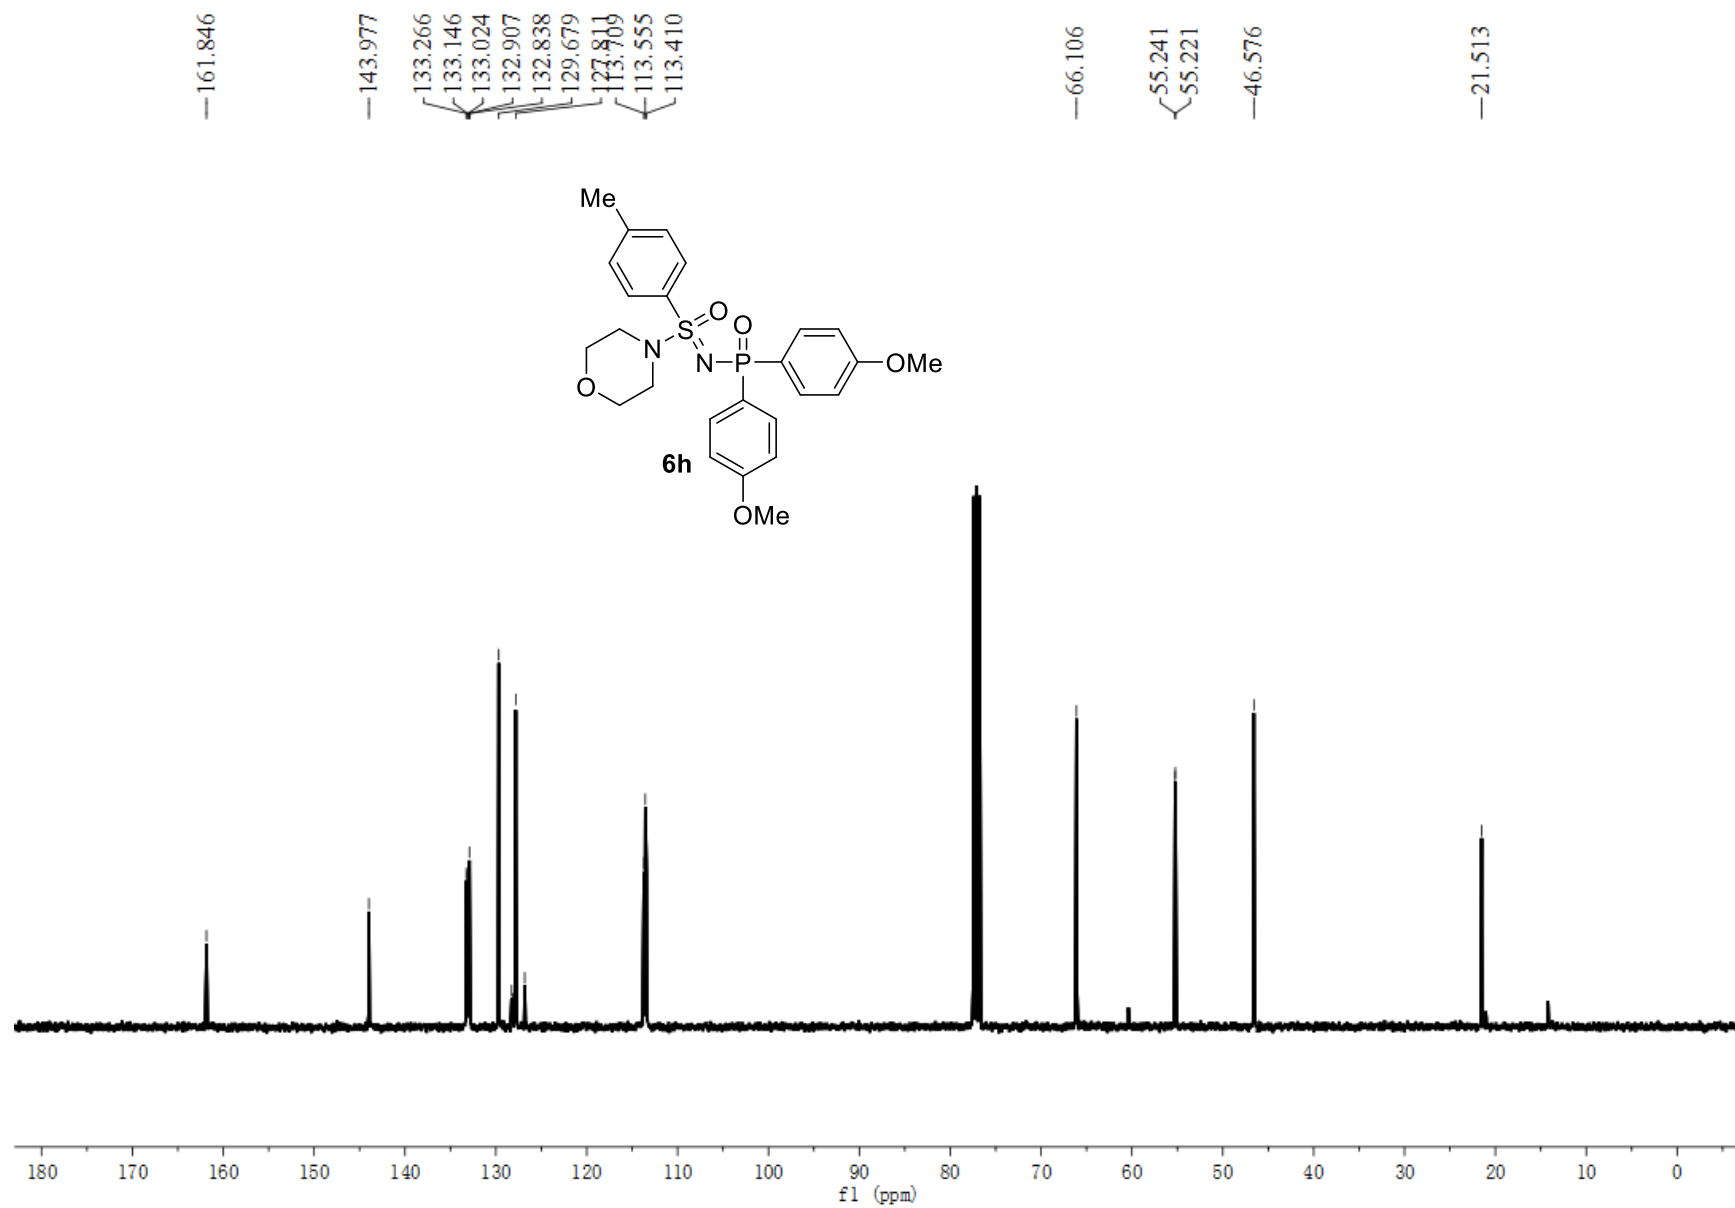

$^{31}\text{P}$  NMR spectra of compound **6h** (162 MHz,  $\text{CDCl}_3$ )

— 14.592

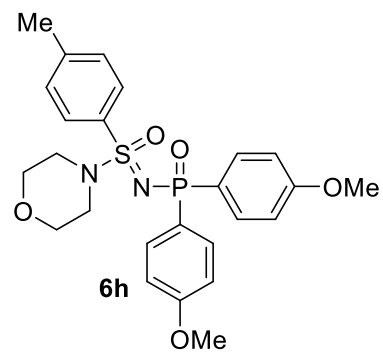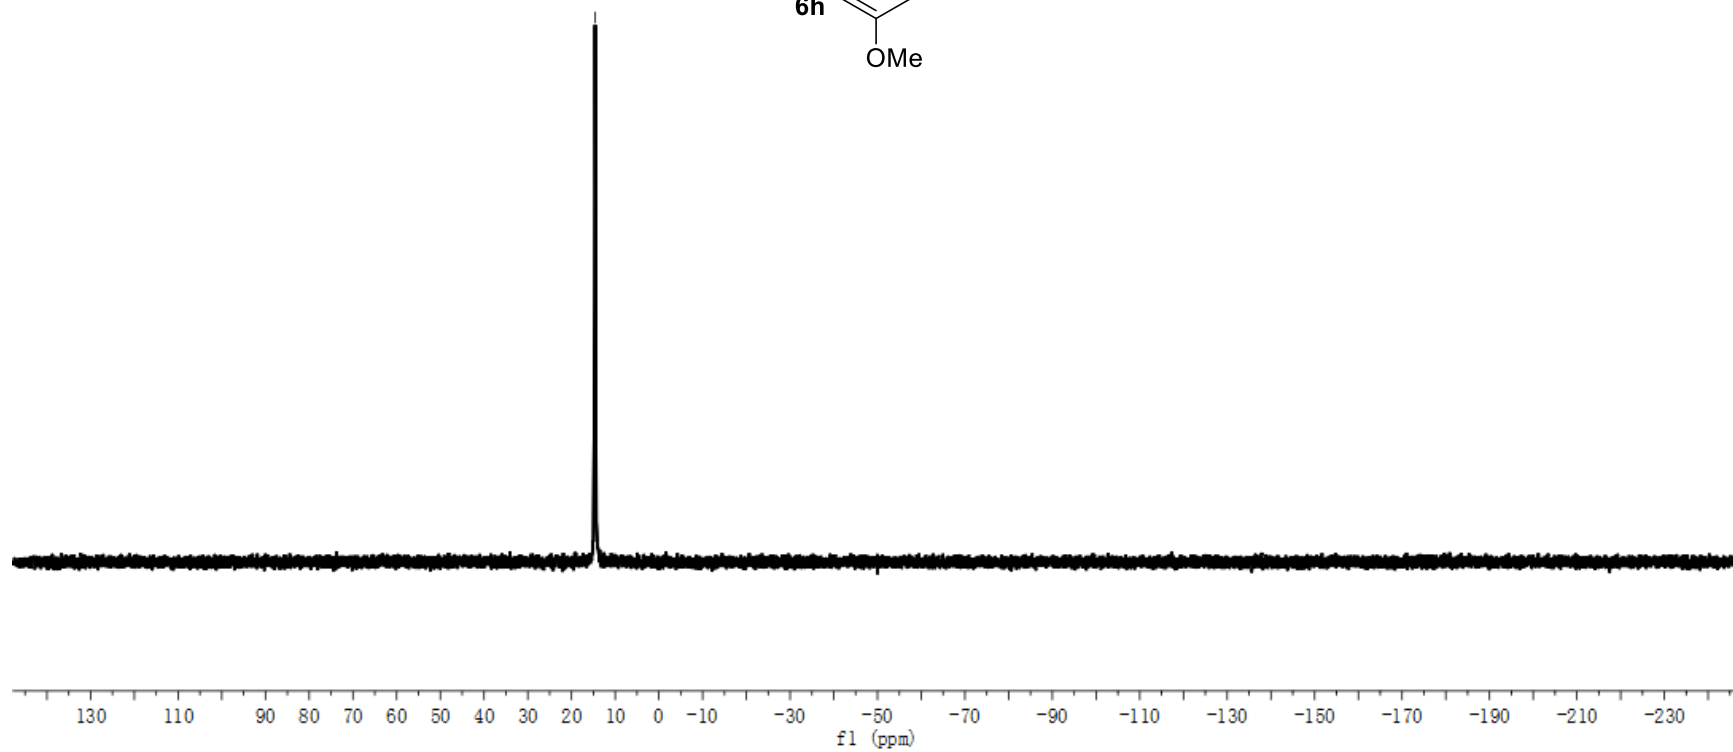

<sup>1</sup>H NMR spectra of compound **6i** (400 MHz, CDCl<sub>3</sub>)

7.750 7.732 7.528 7.492 7.456 7.328 7.309 7.063 7.043 3.653 3.616 3.577 3.111 3.094 2.920 2.906 2.892 2.431 2.306 2.287

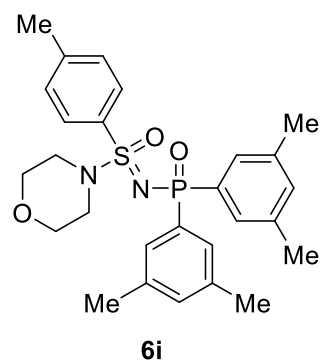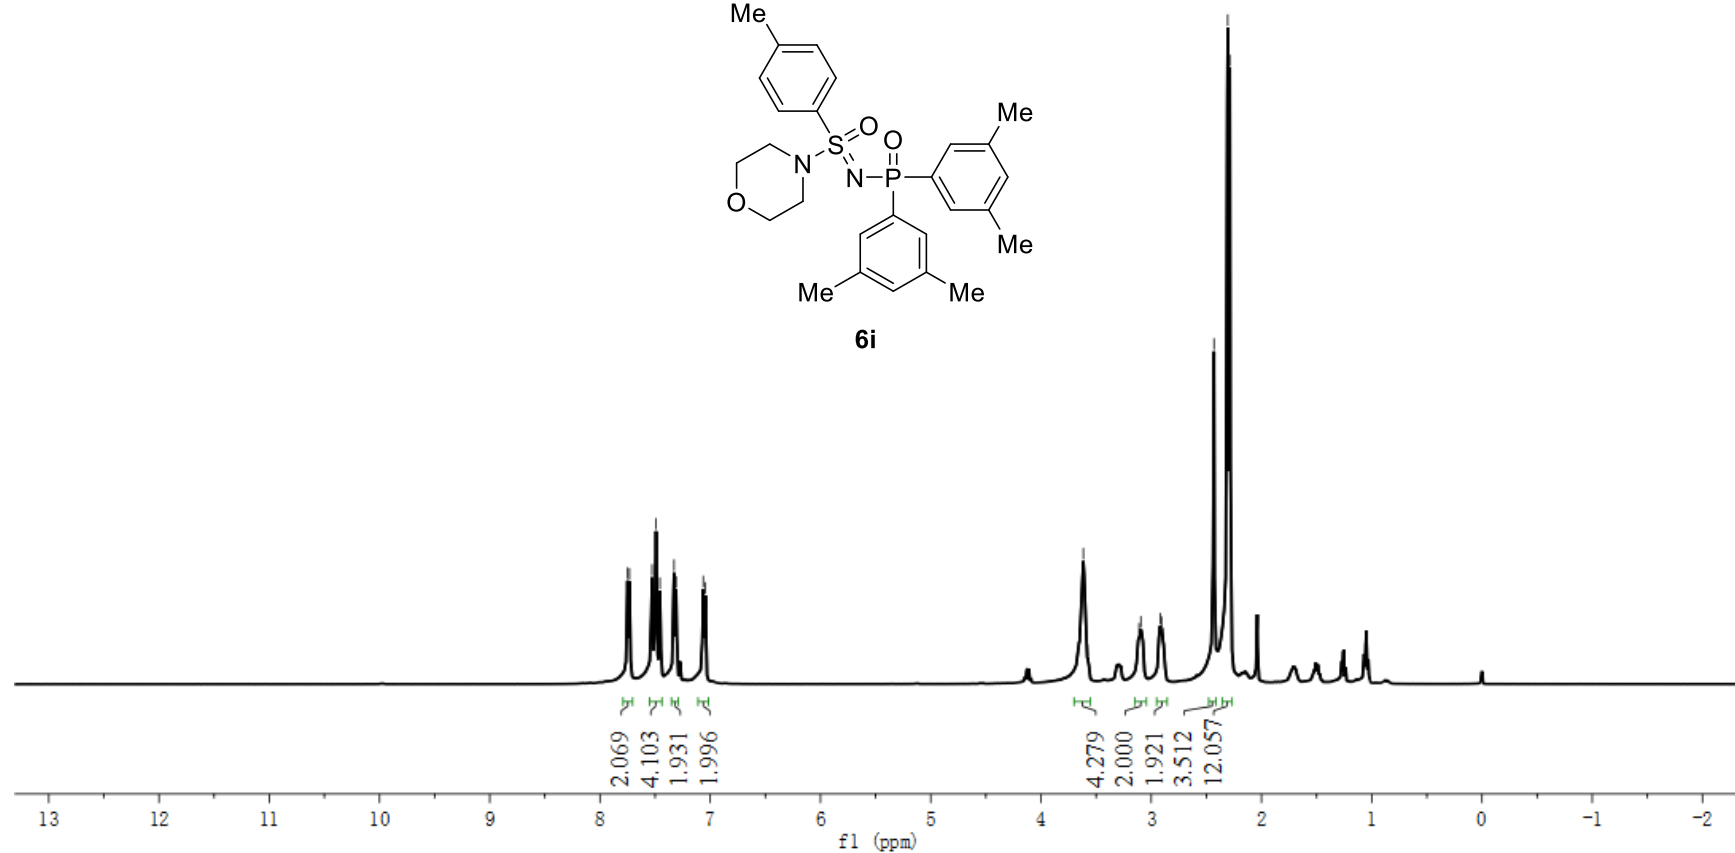

$^{13}\text{C}$  NMR spectra of compound **6i** (101 MHz,  $\text{CDCl}_3$ )

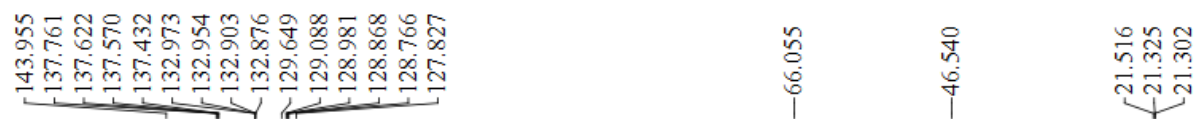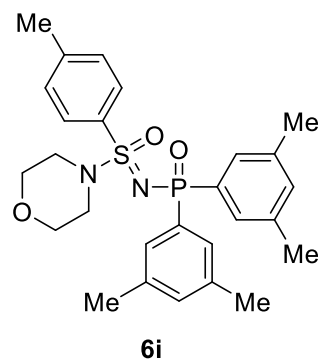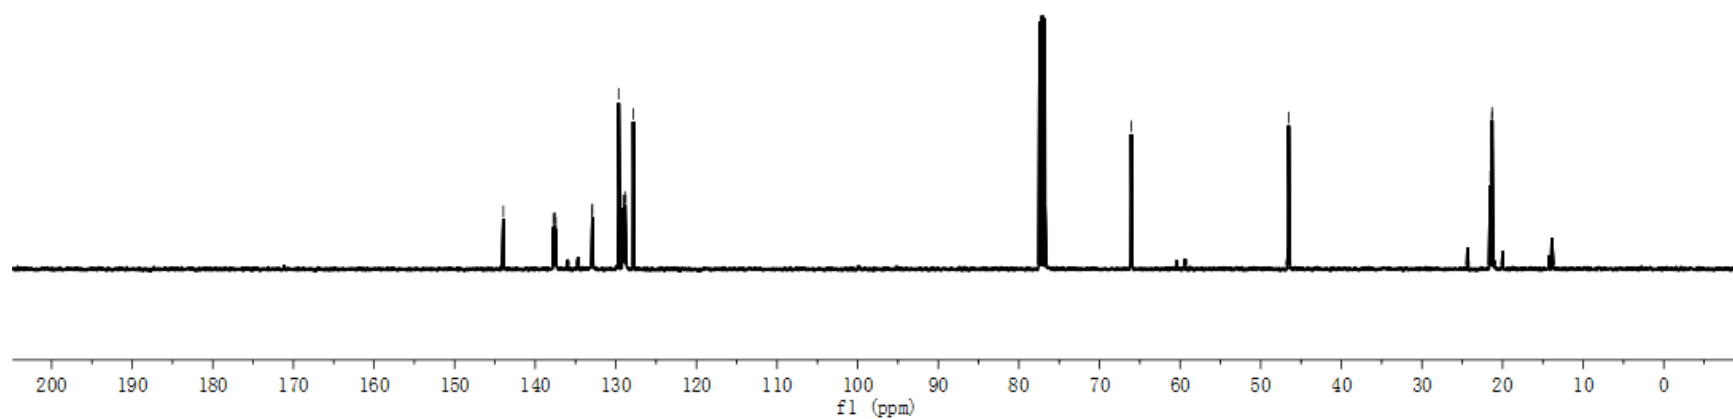

$^{31}\text{P}$  NMR spectra of compound **6i** (162 MHz,  $\text{CDCl}_3$ )

—15.487

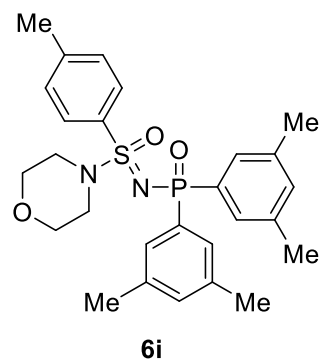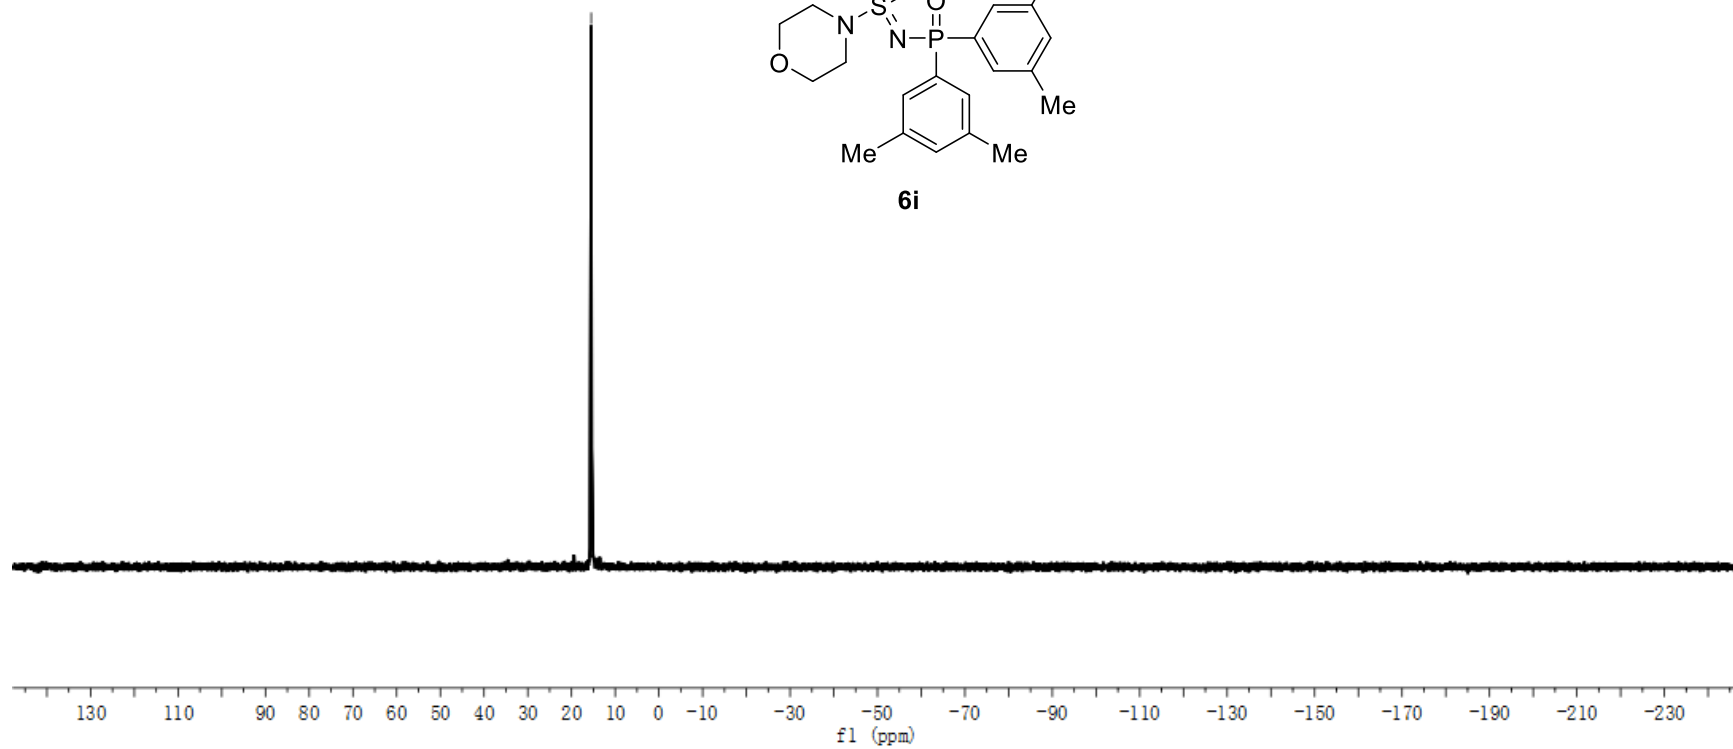

<sup>1</sup>H NMR spectra of compound **6j** (400 MHz, CDCl<sub>3</sub>)

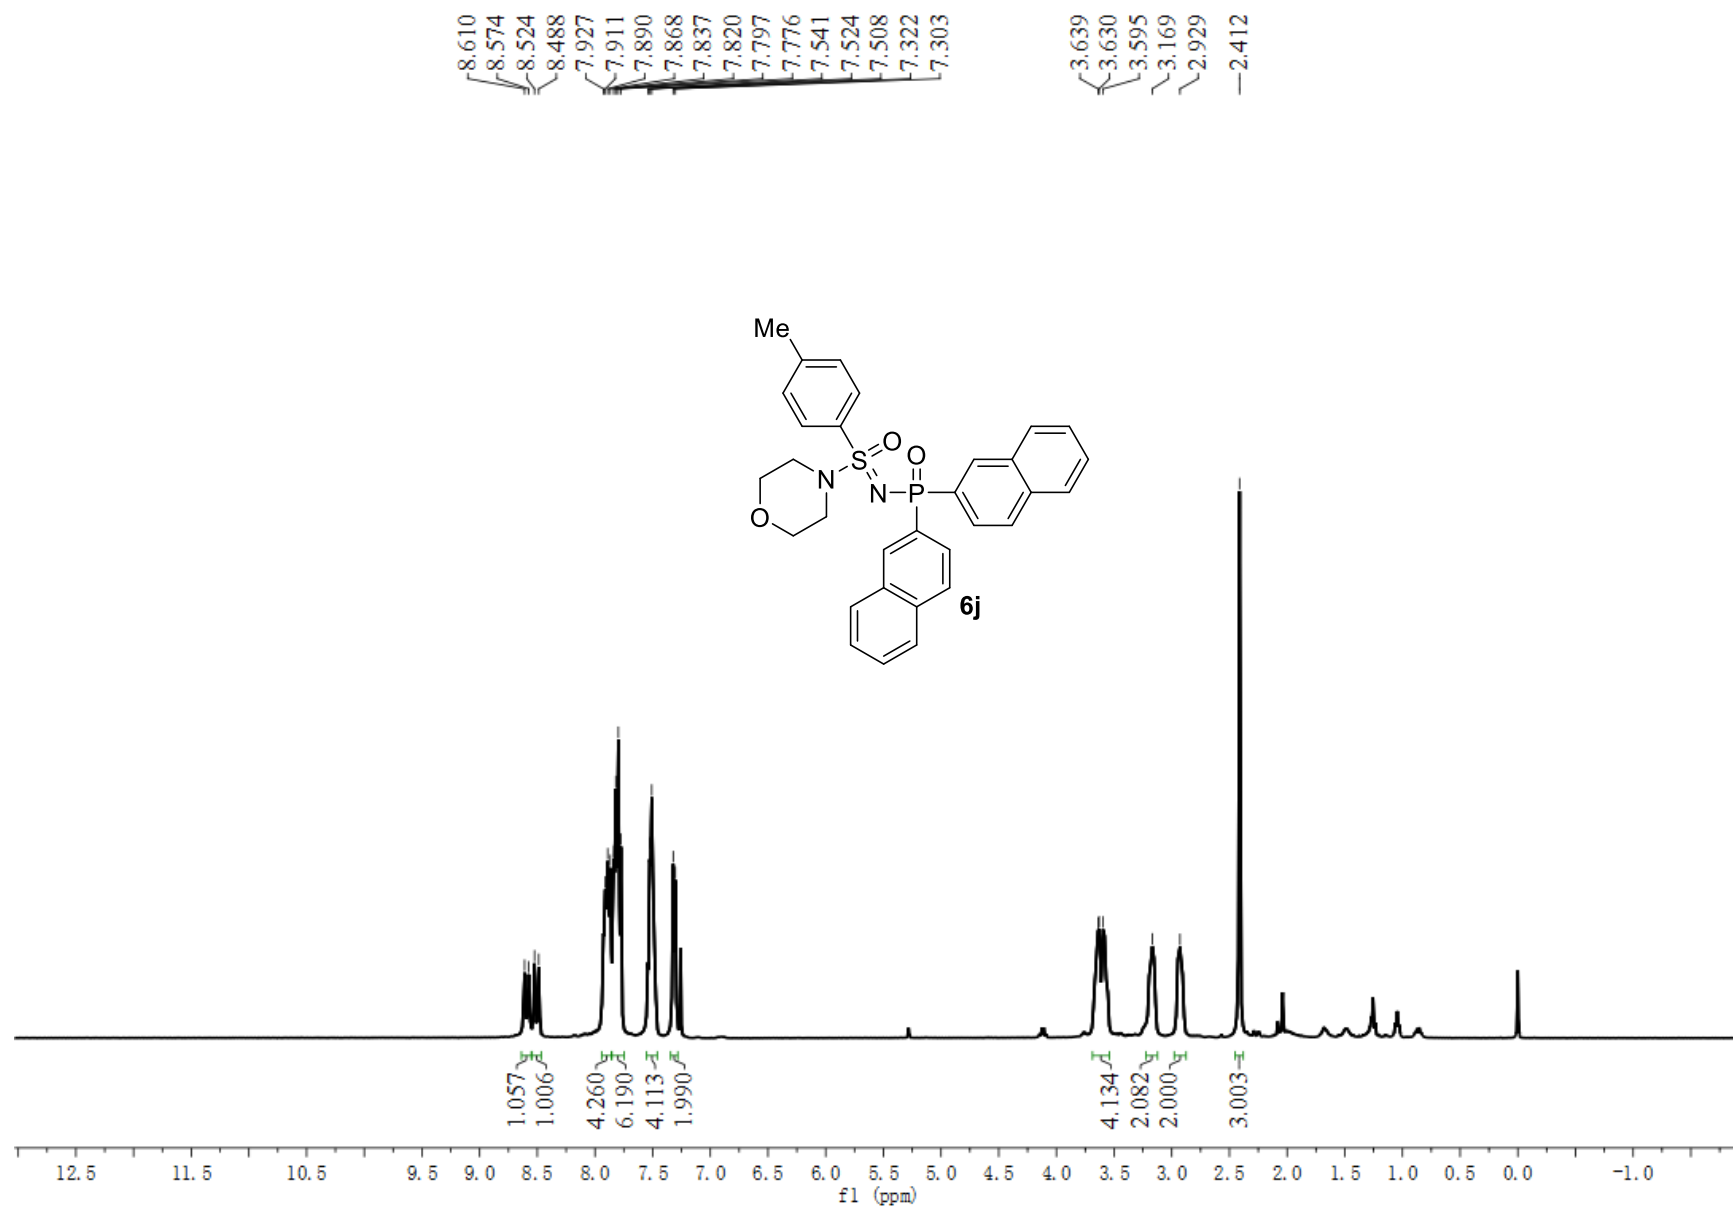

$^{13}\text{C}$  NMR spectra of compound **6j** (101 MHz,  $\text{CDCl}_3$ )

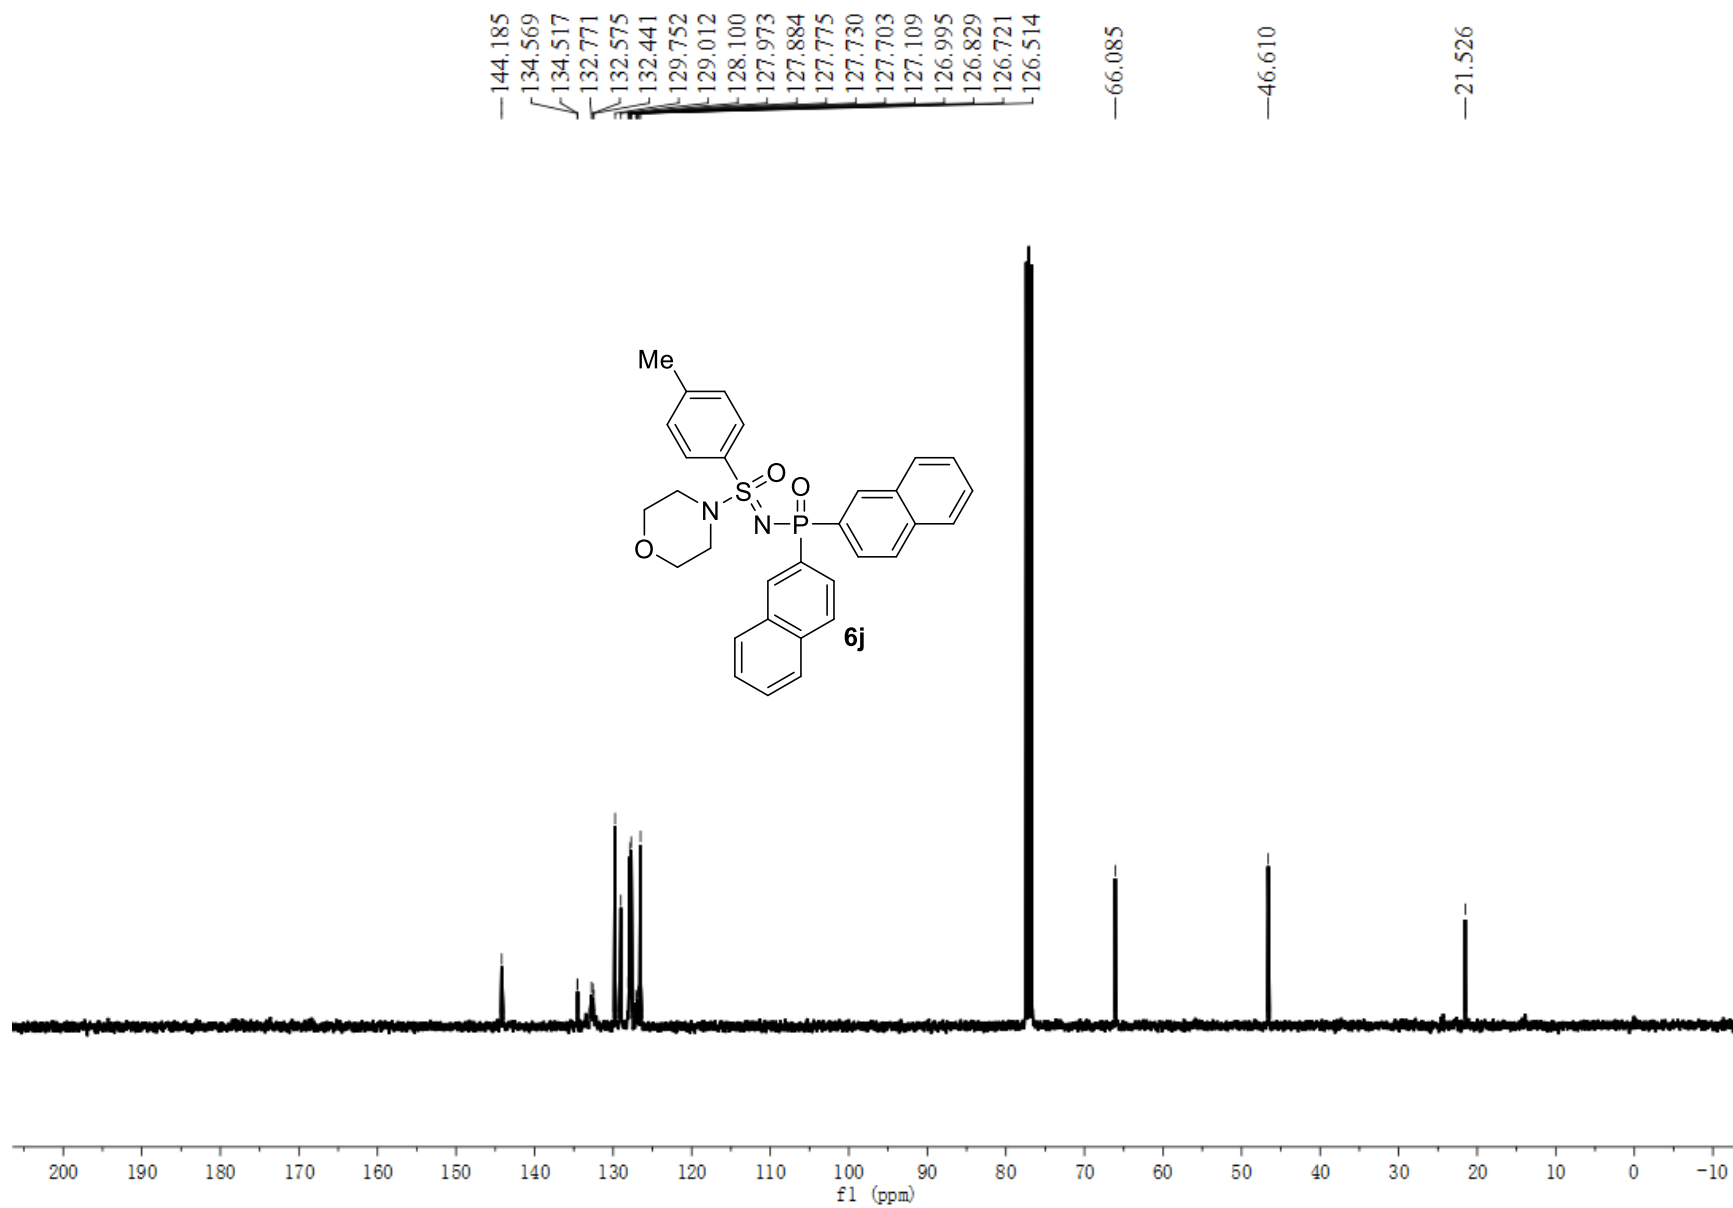

$^{31}\text{P}$  NMR spectra of compound **6j** (162 MHz,  $\text{CDCl}_3$ )

—14.203

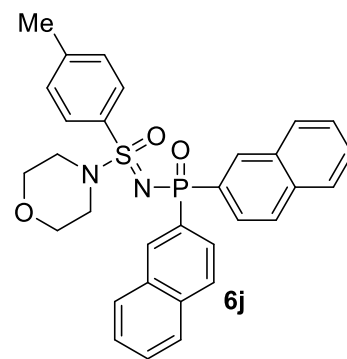

<sup>1</sup>H NMR spectra of compound **3aa** (400 MHz, CDCl<sub>3</sub>)

8.185  
7.553  
7.534  
7.332  
7.312  
7.214  
7.210  
7.195  
7.178  
7.159  
7.130  
7.111  
7.102  
7.093  
6.954

2.504  
2.235

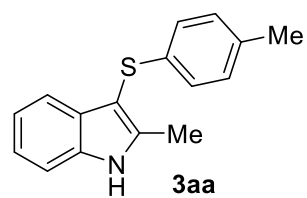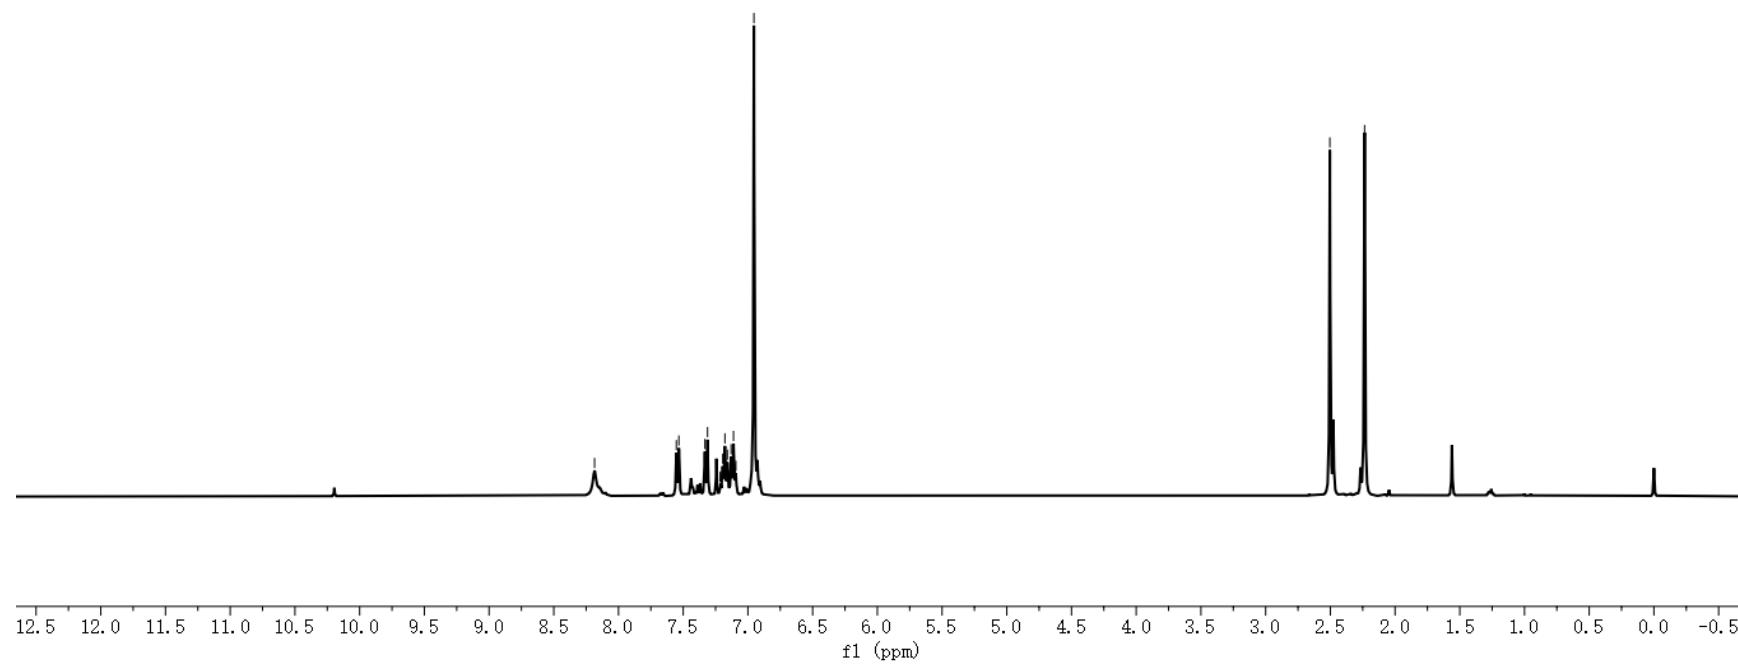

<sup>13</sup>C NMR spectra of compound **3aa** (101 MHz, CDCl<sub>3</sub>)

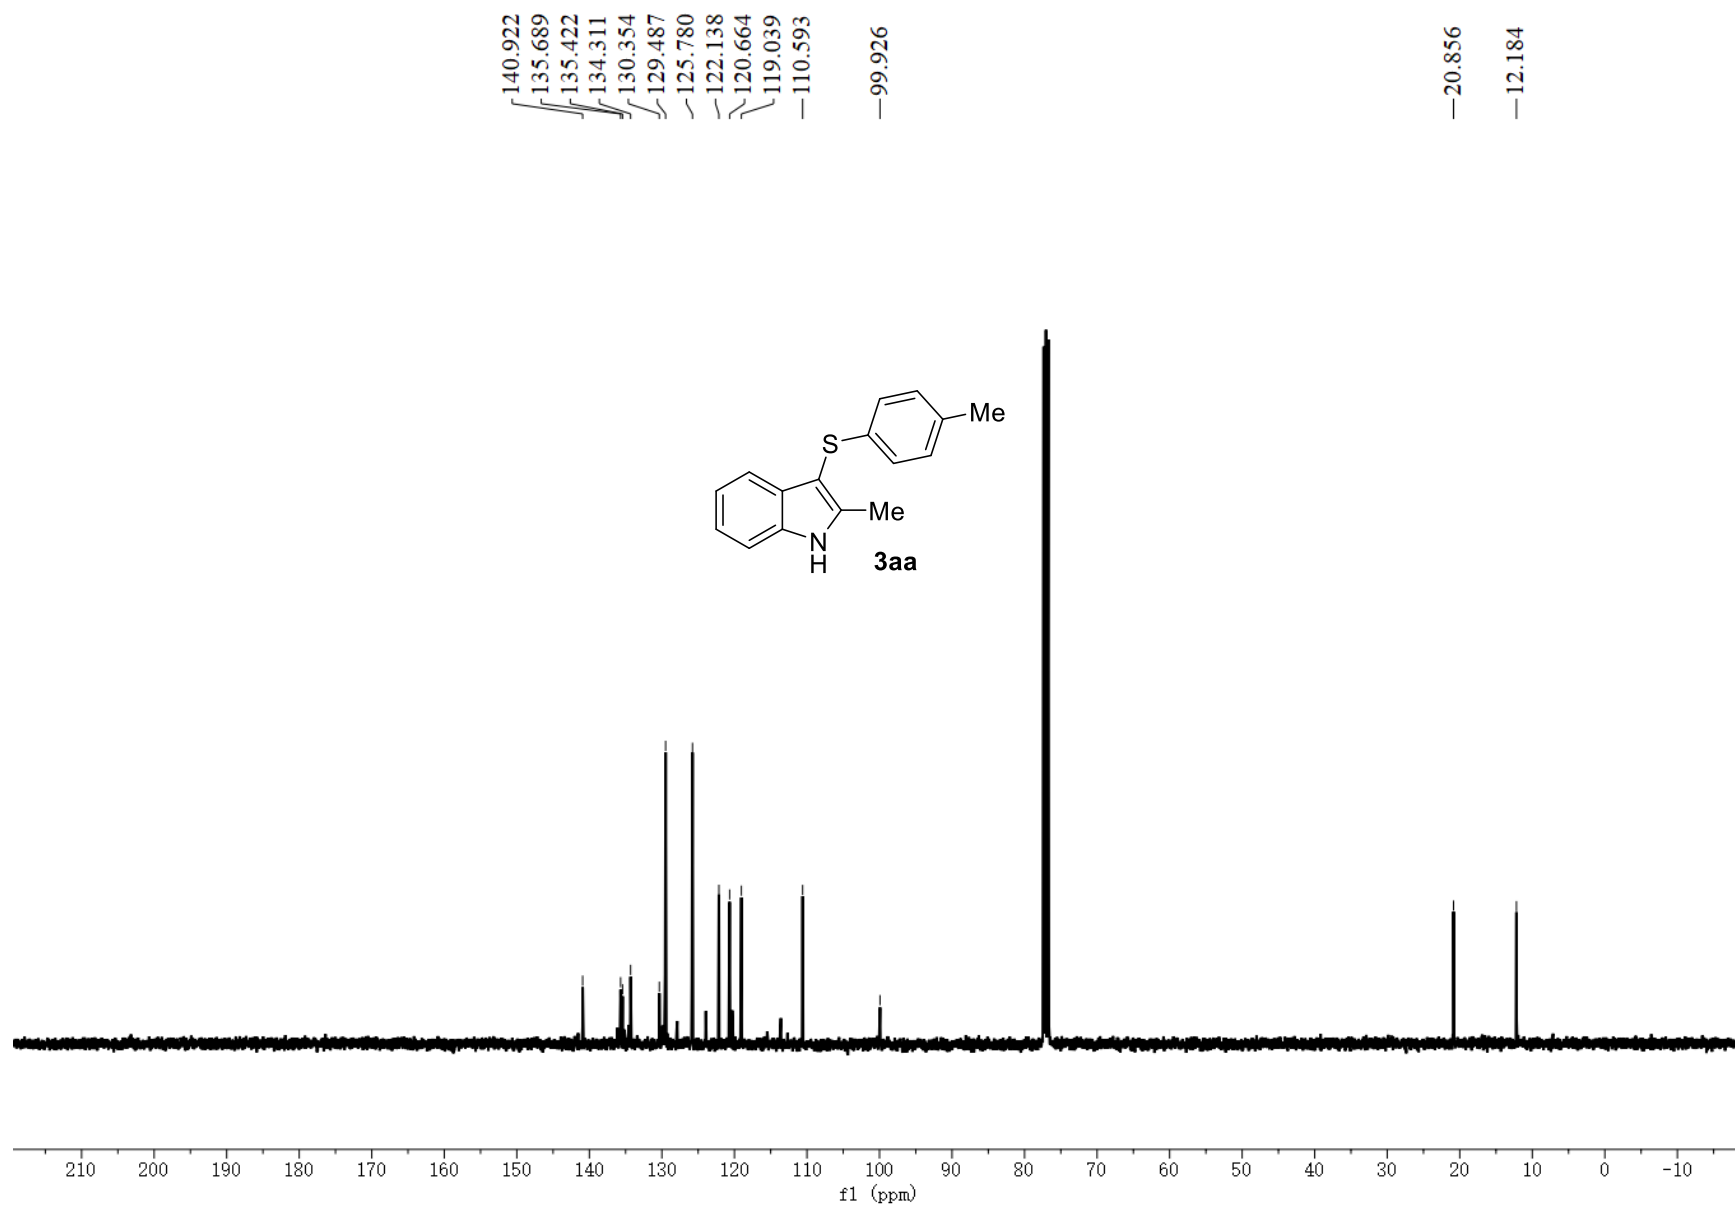

Supplement: d3cc04351g1.pdf [file d3cc04351g1.pdf]
